# Supplementary material for: Identifying Alternative Hyper-Splicing Signatures in MG-Thymoma by Exon Arrays
Source: PLoS One. 2008 Jun 11;3(6):e2392. doi: 10.1371/journal.pone.0002392 (PMC2409220; doi:10.1371/journal.pone.0002392)
Supplement: DataSet S1 — 1D-Gel Mass Spectrometry Proteomic Analysis Results on the MG-Thymoma and Healthy Thymus Samples. All the identified peptides are given, with the corresponding proteins identified by clustering analysis and NCBI database [4] (1.72 MB XLS) [file pone.0002392.s013.xls]

## Sheet: Sheet1
Dataset S1
1D-gel mass spectrometry (MS) identification results
Serial#	Gi	Protein Name	Comment	# identified peptides	Sources						A	B	C	D
1	52001697	serum albumin precursor [Homo sapiens]		37	D,C,B,A					Sequest
					> Score >	Mass	Sequence	Sources	charge	xCorr	26	28	36	29
				1	95 95	927.494	YLYEIAR	A,B,C,D	2	2.547
				2	86	933.497	LC(+57)TVATLR	A,B,C,D	2	2.2364
				3	80	940.448	DDNPNLPR	A,B,C,D	2	1.817
				4	80	951.442	DLGEENFK	A,B,D	2	2.1272
				5	91	960.563	FQNALLVR	A,B,C,D	2	2.8761
				6	97	1013.6	LVAASQAALGL	A,B,C,D	2	3.898
				7	90	1013.6	LVAASQAALGL	C	2	3.898
				8	93 93	1017.54	SLHTLFGDK	A,B,C,D	2	2.2462
				9	82	1055.59	KYLYEIAR	A,B,C	2	2.6236
				10	90	1074.54	LDELRDEGK	C,D	2	2.1531
				11	75	1074.54	LDELRDEGK	A	2	2.1531
				12	86 82	1075.48	NEC(+57)FLQHK	B,D	2	2.6857
				13	96	1128.7	KQTALVELVK	A,B,C,D	2	2.9604
				14	89	1141.69	KLVAASQAALGL	C	2	3.0824
				15	97 90	1149.62	LVNEVTEFAK	A,B,C,D	2	3.4916
				16	99	1742.89	HPYFYAPELLFFAK	B,C,D	3	4.9691
				17	94 89	1226.61	FKDLGEENFK	A,B,C,D	2	3.3459
				18	84	1996.91	NEC(+57)FLQHKDDNPNLPR	C	3	3.3296
				19	84	1996.91	NEC(+57)FLQHKDDNPNLPR	C	3	3.3296
				20	97	1342.63	AVMDDFAAFVEK	B,C,D	2	4.2236
				21	85	1342.63	AVMDDFAAFVEK	B	2	4.2236
				22	88	1342.63	AVMDDFAAFVEK	A	2	4.2236
				23	83	1342.63	AVMDDFAAFVEK	A	2	4.2236
				24	96	1358.63	AVM(+16)DDFAAFVEK	A,B,C,D	2	4.2236
				25	81	1358.63	AVM(+16)DDFAAFVEK	B	2	4.2236
				26	93	2045.1	VFDEFKPLVEEPQNLIK	A,C,D	2	5.2077
				27	97	1371.52	AAFTEC(+57)C(+57)QAADK	A,B,C,D	2	3.8986
				28	90	2086.77	VHTEC(+57)C(+57)HGDLLEC(+57)ADDR	B,C,D	3	3.9793
				29	71	2086.77	VHTEC(+57)C(+57)HGDLLEC(+57)ADDR	A	3	3.9793
				30	95	1443.62	YIC(+57)ENQDSISSK	A,B,C,D	2	3.7009
				31	92	1499.61	ADDKETC(+57)FAEEGK	B,C,D	2	3.4159
				32	87	2260	EFNAETFTFHADIC(+57)TLSEK	A,B,C,D	2	3.2775
				33	95	1511.84	VPQVSTPTLVEVSR	A,B,C,D	2	3.4935
				34	84	1546.75	LKEC(+57)C(+57)EKPLLEK	C	2	4.3546
				35	82 82	789.472	LVTDLTK	A,B,C,D	1	2.1417
				36	99	1623.79	DVFLGMFLYEYAR	A,B,C,D	2	4.5171
				37	81	1623.79	DVFLGMFLYEYAR	B	2	4.5171
				38	93	1627.71	ADDKETC(+57)FAEEGKK	C	2	3.917
				39	99	1639.79	DVFLGM(+16)FLYEYAR	A,B,C,D	2	4.5171
				40	94 93	1639.94	KVPQVSTPTLVEVSR	A,B,C,D	2	3.9311
				41	94	1657.73	QNC(+57)ELFEQLGEYK	A,B,C,D	2	4.3684
				42	81	1657.73	QNC(+57)ELFEQLGEYK	C	2	4.3684
				43	95	2490.26	ALVLIAFAQYLQQC(+57)PFEDHVK	A,B,C,D	2	4.4211
				44	75	2518.17	MPC(+57)AEDYLSVVLNQLC(+57)VLHEK	C	2	4.9625
				45	83	2518.17	MPC(+57)AEDYLSVVLNQLC(+57)VLHEK	A,C	2	4.9625
				46	91	2534.17	M(+16)PC(+57)AEDYLSVVLNQLC(+57)VLHEK	A,B,C,D	2	4.9625
				47	91	2650.24	LVRPEVDVMC(+57)TAFHDNEETFLK	C	3	6.4295
				48	89	2690.27	RM(+16)PC(+57)AEDYLSVVLNQLC(+57)VLHEK	C	3	5.5687
				49	94	2778.34	LVRPEVDVMC(+57)TAFHDNEETFLKK	C	3	5.4007
				50	76	940.448	DDNPNLPR	A,B,C,D	2	1.817
				51	95	951.442	DLGEENFK	A,B,C,D	2	2.1272
				52	97	1910.91	RPC(+57)FSALEVDETYVPK	A,B,C,D	2	4.6701
				53	80 80	1017.54	SLHTLFGDK	C	2	2.2462
				54	78 78	1017.54	SLHTLFGDK	B	2	2.2462
				55	71	2045.1	VFDEFKPLVEEPQNLIK	D	2	5.2077
				56	96	2045.1	VFDEFKPLVEEPQNLIK	A,B,C,D	2	5.2077
				57	75	2045.1	VFDEFKPLVEEPQNLIK	A	2	5.2077
				58	77	2260	EFNAETFTFHADIC(+57)TLSEK	B	2	3.2775
				59	82	2260	EFNAETFTFHADIC(+57)TLSEK	C	2	3.2775
				60	75	2260	EFNAETFTFHADIC(+57)TLSEK	C	2	3.2775
				61	86	2490.26	ALVLIAFAQYLQQC(+57)PFEDHVK	C	2	4.4211
				62	90	2518.17	MPC(+57)AEDYLSVVLNQLC(+57)VLHEK	C	2	4.9625
				63	80	2534.17	M(+16)PC(+57)AEDYLSVVLNQLC(+57)VLHEK	A,C,D	2	4.9625
				64	87	1342.63	AVMDDFAAFVEK	A,C	2	4.2236
				65	95	2974.32	SHC(+57)IAEVENDEMPADLPSLAADFVESK	C	2	5.2423
				66	78	2990.32	SHC(+57)IAEVENDEM(+16)PADLPSLAADFVESK	C,D	2	5.2423
Serial#	Gi	Protein Name	Comment	# identified peptides	Sources
2	75773571	Heat shock 70 kDa protein 8 [Bos taurus]		14	D,C,B,A
	16741727	Heat shock 70kDa protein 8, isoform 1 [Homo sapiens]
	62897129	heat shock 70kDa protein 8 isoform 1 variant [Homo sapiens]			> Score >	Mass	Sequence	Sources	charge	xCorr	12	12	3	7
				1	70	1481.81	SQIHDIVLVGGSTR	A,B,C,D	2	5.173
				2	82	993.525	EIAEAYLGK	A,B,D	2	2.2805
				3	97 91	1199.67	DAGTIAGLNVLR	A,B,D	2	4.27
				4	88 88	1228.63	VEIIANDQGNR	A	2	2.547
				5	94	1253.62	FEELNADLFR	A,B,D	2	4.1511
				6	93	1254.57	FDDAVVQSDMK	A,B	2	3.504
				7	91	1304.61	C(+57)NEIINWLDK	A	2	3.1279
				8	96	1319.6	NSLESYAFNM(+16)K	A,B	2	3.9398
				9	99	1481.81	SQIHDIVLVGGSTR	A,B,C,D	2	5.173
				10	86	1487.7	TTPSYVAFTDTER	A,B,C,D	2	2.9093
				11	70	2260.15	SINPDEAVAYGAAVQAAILSGDK	B	3	4.0526
				12	94	1616.79	SFYPEEVSSMVLTK	A,B,D	2	4.3856
				13	94	1632.79	SFYPEEVSSM(+16)VLTK	A,B,D	2	4.3856
				14	95	1649.8	NQVAMNPTNTVFDAK	A,B,D	2	4.9764
				15	95	1665.8	NQVAM(+16)NPTNTVFDAK	A,B,C,D	2	4.9764
				16	97	1691.73	STAGDTHLGGEDFDNR	A,B	2	4.3034
				17	73	2774.33	QTQTFTTYSDNQPGVLIQVYEGER	B	2	3.4942
Serial#	Gi	Protein Name	Comment	# identified peptides	Sources
3	32364480	heat-shock 70-kilodalton protein 1A [Bos taurus]		11	D,C,B,A
	32364478	heat-shock 70-kilodalton protein 1B [Bos taurus]
	39645782	Heat shock 70kDa protein 1B [Homo sapiens]
	40254806	heat shock 70 kD protein 1 [Bos taurus]
	62089222	heat shock 70kDa protein 1A variant [Homo sapiens]
	4529893	HSP70-1 [Homo sapiens]
	4529892	HSP70-2 [Homo sapiens]			> Score >	Mass	Sequence	Sources	charge	xCorr	11	4	2	2
				1	77 77	1465.81	AQIHDLVLVGGSTR	A	3	2.8491
				2	90	1197.69	DAGVIAGLNVLR	A	2	2.7817
				3	88 88	1228.63	VEIIANDQGNR	A	2	2.547
				4	91	1261.66	LVNHFVEEFK	A,B	2	3.4987
				5	93	1303.6	NALESYAFNM(+16)K	A	2	3.357
				6	90	1315.58	FEELC(+57)SDLFR	A	2	2.484
				7	86	1487.7	TTPSYVAFTDTER	A,B,C,D	2	2.9093
				8	87	1614.81	AFYPEEISSMVLTK	A	2	3.0828
				9	91	1658.85	NQVALNPQNTVFDAK	A,B,C,D	2	5.1946
				10	95	1687.9	IINEPTAAAIAYGLDR	A,B	2	5.3474
				11	94	2981.46	TLSSSTQASLEIDSLFEGIDFYTSITR	A	2	4.4735
Serial#	Gi	Protein Name	Comment	# identified peptides	Sources
4	2598562	BiP [Mus musculus]		11	D,C,B,A
	74198293	unnamed protein product [Mus musculus]
	74198974	unnamed protein product [Mus musculus]
	38303969	Heat shock 70kD protein 5 [Rattus norvegicus]
	16507237	heat shock 70kDa protein 5 (glucose-regulated protein, 78kDa) [Homo sapiens]
	86577744	Unknown (protein for MGC:132411) [Homo sapiens]
	6470150	BiP protein [Homo sapiens]
	31981722	heat shock 70kD protein 5 (glucose-regulated protein) [Mus musculus]			> Score >	Mass	Sequence	Sources	charge	xCorr	7	9	1	2
				1	71	1604.87	TKPYIQVDIGGGQTK	B	3	2.8431
				2	88 88	1228.63	VEIIANDQGNR	A	2	2.547
				3	94	1233.63	DAGTIAGLNVM(+16)R	A,B	2	3.6144
				4	80	1233.63	DAGTIAGLNVM(+16)R	B	2	3.6144
				5	81	1887.97	VTHAVVTVPAYFNDAQR	A	3	2.2616
				6	83 79	1316.64	NELESYAYSLK	B	2	3.1981
				7	89	1397.79	ELEEIVQPIISK	B	2	2.8011
				8	97 88	1430.69	TWNDPSVQQDIK	A,B	2	3.8696
				9	99	1460.76	SDIDEIVLVGGSTR	A,B	2	3.8904
				10	88	1552.8	TFAPEEISAM(+16)VLTK	B	2	3.0398
				11	95	1677.81	NQLTSNPENTVFDAK	A,B,D	2	4.7971
				12	99	1836.93	SQIFSTASDNQPTVTIK	A,B,C,D	2	5.2378
Serial#	Gi	Protein Name	Comment	# identified peptides	Sources
5	55743098	alpha 3 type VI collagen isoform 1 precursor [Homo sapiens]		30	D,C,B,A
	55743102	alpha 3 type VI collagen isoform 3 precursor [Homo sapiens]
	55743106	alpha 3 type VI collagen isoform 5 precursor [Homo sapiens]
	55743104	alpha 3 type VI collagen isoform 4 precursor [Homo sapiens]
	62988748	unknown [Homo sapiens]			> Score >	Mass	Sequence	Sources	charge	xCorr	27	20	10	13
				1	91 85	983.625	ALILVGLER	A	2	3.1173
				2	80	1483.81	IIDELNVKPEGTR	A	2	3.5703
				3	96	993.5	DSFQEVLR	A,B	2	2.7912
				4	72	999.511	ELPNIEER	A	2	2.2486
				5	76	1613.85	SLDEISQPAQELKR	A,B	3	1.6675
				6	97	1673.96	IEDGVPQHLVLVLGGK	A	2	2.5857
				7	81	1679.86	IAVAQYSDDVKVESR	D	2	1.4741
				8	97	1146.61	SSGIVSLGVGDR	A,B	2	3.4603
				9	80	1154.59	SSIM(+16)AFAIGNK	A	2	2.8115
				10	80	1218.64	VAVIQFSDDPK	B	2	2.641
				11	88	1218.64	VAVIQFSDDPK	A	2	2.641
				12	88	1229.72	VPQIAFVITGGK	B	2	2.7487
				13	84	1229.59	NNLFTSSAGYR	D	2	2.7317
				14	90	1238.65	VAVFFSNTPTR	A	2	2.7861
				15	80	1238.65	VAVFFSNTPTR	B	2	2.7861
				16	76	1320.73	QSGVVPFIFQAK	A	2	2.1476
				17	95	1403.79	LSDAGITPLFLTR	A,B,C,D	2	3.6972
				18	98	1431.65	SDDEVDDPAVELK	A,B,C,D	2	3.997
				19	92 83	1457.75	SLDEISQPAQELK	A,C	2	2.9875
				20	93	1462.77	QINVGNALEYVSR	A,B	2	3.5948
				21	89	1467.76	ALNLGYALDYAQR	A	2	3.9261
				22	86	1483.81	IIDELNVKPEGTR	B	2	3.5703
				23	84	1483.81	IIDELNVKPEGTR	A,C	2	3.5703
				24	95	1513.75	LVDYLDVGFDTTR	A,B,D	2	4.2846
				25	97	1586.93	LQPVLQPLPSPGVGGK	A,B,C,D	2	4.2468
				26	94	1617.95	AAPLQGMLPGLLAPLR	A,B	2	4.0675
				27	97	1631.82	SVEDAQDVSLALTQR	A,B,C,D	2	4.9531
				28	89	1633.95	AAPLQGM(+16)LPGLLAPLR	A,B,D	2	4.0675
				29	75	1673.96	IEDGVPQHLVLVLGGK	A	2	2.5857
				30	99	1685.97	LLTPITTLTSEQIQK	A,B,C,D	2	4.7978
				31	86	1707.89	VAVVTYNNEVTTEIR	B	2	4.748
				32	84	1707.89	VAVVTYNNEVTTEIR	A	2	4.748
				33	82	1707.89	VAVVTYNNEVTTEIR	D	2	4.748
				34	88	1707.89	VAVVTYNNEVTTEIR	C	2	4.748
				35	90	1715.96	IEEGVPQFLVLISSGK	A,B,C,D	2	4.2949
				36	93	1731.89	ISLSPEYVFSVSTFR	A,B,C,D	2	3.8601
				37	79	1738.01	ITEGVPQLLIVLTADR	A,B	2	3.1589
				38	91	2636.42	NADPAELEQIVLSPAFILAAESLPK	A,B,D	2	4.4508
				39	71	3014.4	VSVVANTPSGPVEAFDFDEYQPEM(+16)LEK	A	2	3.8802
Serial#	Gi	Protein Name	Comment	# identified peptides	Sources
6	3169000	OTTHUMP00000028706 [Homo sapiens]		23	D,C,B,A
					> Score >	Mass	Sequence	Sources	charge	xCorr	19	16	4	11
				1	85	924.494	VVFQEFR	A,D	2	2.9019
				2	95	1193.62	ALELDSNLYR	A,B	2	3.0471
				3	92	1205.64	TDLLLEPYNK	A,B	2	3.8624
				4	71	1220.65	KFDQLLAEEK	D	2	3.3588
				5	94 86	1220.65	KFDQLLAEEK	A,B	2	3.3588
				6	80	1220.65	KFDQLLAEEK	D	2	3.3588
				7	81	1274.7	YEILTPNSIPK	B	2	1.8147
				8	86	1949.99	LQQELDDLLVDLDHQR	A,B,D	2	4.8983
				9	83	1980.91	KMEDSVGC(+57)LETAEEVKR	A	3	2.4105
				10	90	1996.01	HSQAVEELAEQLEQTKR	A,B	3	5.1992
				11	81	1348.62	DELADEIANSSGK	A	2	3.8357
				12	88	1348.62	DELADEIANSSGK	B	2	3.8357
				13	90	2088.98	QAQQERDELADEIANSSGK	A	3	3.8969
				14	95	1486.9	VISGVLQLGNIVFK	B	2	3.8891
				15	94	1530.77	IAQLEEQLDNETK	A,B,C,D	2	4.8065
				16	88	1530.77	IAQLEEQLDNETK	B	2	4.8065
				17	81	1530.77	IAQLEEQLDNETK	B	2	4.8065
				18	83	1530.77	IAQLEEQLDNETK	B	2	4.8065
				19	89	1565.67	ELEDATETADAMNR	D	2	3.5893
				20	76	1565.67	ELEDATETADAMNR	D	2	3.5893
				21	97	1653.79	IAEFTTNLTEEEEK	A,B,C,D	2	4.7195
				22	70	2493.17	DFSALESQLQDTQELLQEENR	B	2	3.8294
				23	90	1672.84	NFINNPLAQADWAAK	A,B	2	4.7666
				24	98	1726.95	QLLQANPILEAFGNAK	A,B,C,D	2	4.7337
				25	85	2615.34	KLEGDSTDLSDQIAELQAQIAELK	B	3	4.3559
				26	92	1743.86	NLPIYSEEIVEM(+16)YK	A	2	4.0011
				27	88	2615.34	KLEGDSTDLSDQIAELQAQIAELK	A	3	4.3559
				28	91 91	1869.97	ANLQIDQINTDLNLER	C	2	6.0773
				29	94 94	1869.97	ANLQIDQINTDLNLER	A,B,D	2	6.0773
				30	96	1946.01	LQVELDNVTGLLSQSDSK	A,B,D	2	6.5871
				31	84	1949.99	LQQELDDLLVDLDHQR	A,D	2	4.8983
				32	90	1961.92	TQLEELEDELQATEDAK	A	2	5.6531
				33	73	2487.25	LEGDSTDLSDQIAELQAQIAELK	D	2	2.869
				34	96	2493.17	DFSALESQLQDTQELLQEENR	D	2	3.8294
				35	82	2493.17	DFSALESQLQDTQELLQEENR	A	2	3.8294
Serial#	Gi	Protein Name	Comment	# identified peptides	Sources
7	22165384	tubulin, beta, 2 [Mus musculus]		15	D,C,B,A
	13542680	Tubulin, beta, 2 [Mus musculus]
	23958133	Tubulin, beta, 2 [Homo sapiens]			> Score >	Mass	Sequence	Sources	charge	xCorr	14	14	8	8
				1	80 79	1028.5	TAVC(+57)DIPPR	B	2	2.4169
				2	94	1130.6	FPGQLNADLR	A,B,C,D	2	2.8724
				3	91 85	1159.63	LAVNM(+16)VPFPR	A,B,D	2	3.3004
				4	85 85	1822.9	EIVHLQAGQC(+57)GNQIGAK	A	2	3.4981
				5	97	1229.6	ISEQFTAMFR	A,C,D	2	3.6256
				6	88	1245.6	ISEQFTAM(+16)FR	A,B,C,D	2	3.6256
				7	94	1958.98	GHYTEGAELVDSVLDVVR	A,B	2	7.2887
				8	91 82	1958.98	GHYTEGAELVDSVLDVVR	C	2	7.2887
				9	94	1319.7	IMNTFSVVPSPK	A,B,D	2	4.5831
				10	86	1328.65	INVYYNEATGGK	A,B	2	2.7692
				11	96	1335.7	IM(+16)NTFSVVPSPK	A,B,C,D	2	4.5831
				12	95	1446.69	EVDEQMLNVQNK	A,B,C,D	2	4.7082
				13	76	1617.82	AVLVDLEPGTM(+16)DSVR	A,B,C,D	2	4.1684
				14	91	1691.87	ALTVPELTQQMFDAK	A,B,D	2	3.776
				15	99	1696.83	NSSYFVEWIPNNVK	A,B,C,D	2	3.8034
				16	75	2708.32	LTTPTYGDLNHLVSATMSGVTTC(+57)LR	A	3	3.8816
				17	83	2708.32	LTTPTYGDLNHLVSATMSGVTTC(+57)LR	B	3	3.8816
				18	85	2708.32	LTTPTYGDLNHLVSATMSGVTTC(+57)LR	C	3	3.8816
				19	96 96	1822.9	EIVHLQAGQC(+57)GNQIGAK	A	2	3.4981
				20	85 85	1822.9	EIVHLQAGQC(+57)GNQIGAK	B	2	3.4981
				21	93 93	1857.94	MSATFIGNSTAIQELFK	A,B	2	5.2825
				22	96	2798.34	SGPFGQIFRPDNFVFGQSGAGNNWAK	A	3	4.1758
				23	88	1958.98	GHYTEGAELVDSVLDVVR	A,B	2	7.2887
Serial#	Gi	Protein Name	Comment	# identified peptides	Sources
8	809561	gamma-actin [Mus musculus]		12	D,C,B,A
	62657474	PREDICTED: similar to Actin, cytoplasmic 2 (Gamma-actin) [Rattus norvegicus]
	74213524	unnamed protein product [Mus musculus]
	74187644	unnamed protein product [Mus musculus]
	74151948	unnamed protein product [Mus musculus]
	74191564	unnamed protein product [Mus musculus]
	74191566	unnamed protein product [Mus musculus]
	94373495	PREDICTED: actin, gamma, cytoplasmic 1 [Mus musculus]
	15928803	Beta actin [Homo sapiens]
	54696574	actin, gamma 1 [Homo sapiens]
	62897409	beta actin variant [Homo sapiens]
	62897625	beta actin variant [Homo sapiens]
	62897671	beta actin variant [Homo sapiens]
	14250401	actin, beta [Homo sapiens]
	16924319	Unknown (protein for IMAGE:3538275) [Homo sapiens]
	15277503	ACTB protein [Homo sapiens]			> Score >	Mass	Sequence	Sources	charge	xCorr	9	10	7	9
				1	94	976.448	AGFAGDDAPR	A,B,C	2	2.7314
				2	86	976.448	AGFAGDDAPR	A,B	2	2.7314
				3	80 72	976.448	AGFAGDDAPR	B	2	2.7314
				4	94	998.486	DLTDYLMK	A,B,C,D	2	2.5963
				5	92	1516.7	QEYDESGPSIVHR	A,B,D	2	2.686
				6	87 82	1515.75	IWHHTFYNELR	B	3	3.4273
				7	80	1516.7	QEYDESGPSIVHR	B	2	2.686
				8	82	1516.7	QEYDESGPSIVHR	A,B	2	2.686
				9	95	1014.49	DLTDYLM(+16)K	A,B,C,D	2	2.5963
				10	90	1132.53	GYSFTTTAER	A,B,C,D	2	2.9965
				11	75	1132.53	GYSFTTTAER	B	2	2.9965
				12	96	1161.62	EITALAPSTMK	A,B,C,D	2	2.9792
				13	90	1171.57	HQGVMVGMGQK	A,D	2	3.3148
				14	93	1177.62	EITALAPSTM(+16)K	A,B,C,D	2	2.9792
				15	72	1187.57	HQGVMVGM(+16)GQK	A,B	2	3.3148
				16	80	1198.52	DSYVGDEAQSK	A	2	2.92
				17	73	1198.52	DSYVGDEAQSK	A	2	2.92
				18	92	1198.52	DSYVGDEAQSK	A	2	2.92
				19	71	1198.52	DSYVGDEAQSK	A	2	2.92
				20	71	1954.07	VAPEEHPVLLTEAPLNPK	A,B,C,D	2	4.0646
				21	91	1516.7	QEYDESGPSIVHR	A,D	2	2.686
				22	78 78	2359.16	KDLYANTVLSGGTTM(+16)YPGIADR	D	3	4.8888
				23	70	2550.15	LC(+57)YVALDFEQEMATAASSSSLEK	D	2	5.5878
				24	99	1790.89	SYELPDGQVITIGNER	A,B,C,D	2	5.3125
				25	89	1790.89	SYELPDGQVITIGNER	B,D	2	5.3125
				26	93	1954.07	VAPEEHPVLLTEAPLNPK	A,B,C,D	2	4.0646
				27	91 82	998.486	DLTDYLMK	A,B,D	2	2.5963
				28	80	1161.62	EITALAPSTMK	B	2	2.9792
				29	85	2550.15	LC(+57)YVALDFEQEMATAASSSSLEK	D	2	5.5878
				30	78	2550.15	LC(+57)YVALDFEQEMATAASSSSLEK	C	2	5.5878
				31	72	2550.15	LC(+57)YVALDFEQEMATAASSSSLEK	B	2	5.5878
				32	90	2566.15	LC(+57)YVALDFEQEM(+16)ATAASSSSLEK	D	2	5.5878
				33	77	2566.15	LC(+57)YVALDFEQEM(+16)ATAASSSSLEK	D	2	5.5878
Serial#	Gi	Protein Name	Comment	# identified peptides	Sources
9	91234898	84 kDa heat shock protein [Rattus norvegicus]		9	D,C,B,A
	74147026	unnamed protein product [Mus musculus]
	15680260	Heat shock 90kDa protein 1, beta [Homo sapiens]
	33317937	heat shock protein 84b [Mus musculus]
	6807647	hypothetical protein [Homo sapiens]
	51859516	Unknown (protein for MGC:94263) [Rattus norvegicus]			> Score >	Mass	Sequence	Sources	charge	xCorr	5	8	5	5
				1	80	1160.58	SIYYITGESK	B	2	2.5091
				2	70	1194.65	IDIIPNPQER	B	2	2.6879
				3	87 80	1194.65	IDIIPNPQER	A,B,D	2	2.6879
				4	89	1242.7	ADLINNLGTIAK	A,B,C,D	2	4.182
				5	76	1275.64	ELISNASDALDK	B	2	3.7693
				6	97	1275.64	ELISNASDALDK	A,D	2	3.7693
				7	72	1275.64	ELISNASDALDK	D	2	3.7693
				8	80 80	1349.73	TLTLVDTGIGMTK	B	2	4.1576
				9	77 77	1365.73	TLTLVDTGIGM(+16)TK	B	2	4.1576
				10	94 94	1365.73	TLTLVDTGIGM(+16)TK	B	2	4.1576
				11	74 71	2116.01	C(+57)LELFSELAEDKENYKK	C	3	1.5876
				12	83 80	1416.64	EGLELPEDEEEK	B,C	2	2.7705
				13	95 95	1513.79	GVVDSEDLPLNISR	A,B,C,D	2	5.2668
				14	95	1847.8	NPDDITQEEYGEFYK	A,B,C,D	2	5.6051
Serial#	Gi	Protein Name	Comment	# identified peptides	Sources
10	83699649	heat shock 90kDa protein 1, alpha [Homo sapiens]		8	D,C,B,A
	61656605	Heat shock protein HSP 90-alpha 4 [Homo sapiens]
	40254816	heat shock protein 90kDa alpha (cytosolic), class A member 1 isoform 2 [Homo sapiens]
	60592792	heat shock 90kD protein 1, alpha [Bos taurus]			> Score >	Mass	Sequence	Sources	charge	xCorr	6	5	4	4
				1	76	1589.88	ELHINLIPNKQDR	A	3	1.8878
				2	88	1786.94	HLEINPDHSIIETLR	A	3	3.5786
				3	86	1224.63	HIYYITGETK	A,D	2	2.8057
				4	89	1242.7	ADLINNLGTIAK	A,B,C,D	2	4.182
				5	80 80	1349.73	TLTIVDTGIGMTK	B	2	4.1576
				6	77 77	1365.73	TLTIVDTGIGM(+16)TK	B	2	4.1576
				7	94 94	1365.73	TLTIVDTGIGM(+16)TK	B	2	4.1576
				8	83 80	1416.64	EGLELPEDEEEK	B,C	2	2.7705
				9	95 95	1513.79	GVVDSEDLPLNISR	A,B,C,D	2	5.2668
				10	99	1833.78	NPDDITNEEYGEFYK	A,B,C,D	2	5.3117
Serial#	Gi	Protein Name	Comment	# identified peptides	Sources
11	15010550	heat shock protein gp96 precursor [Homo sapiens]		6	D,C,B,A
					> Score >	Mass	Sequence	Sources	charge	xCorr	3	4	2	1
				1	76	1275.64	ELISNASDALDK	B	2	3.7693
				2	97	1275.64	ELISNASDALDK	A,D	2	3.7693
				3	72	1275.64	ELISNASDALDK	D	2	3.7693
				4	79	1485.75	GVVDSDDLPLNVSR	A	2	4.8874
				5	93	1485.75	GVVDSDDLPLNVSR	A,B,C	2	4.8874
				6	84	2260.06	FQSSHHPTDITSLDQYVER	C	3	3.0018
				7	79	1525.73	EEASDYLELDTIK	B	2	2.6947
				8	85	1734.76	DDEVDVDGTVEEDLGK	B	2	4.282
				9	93	1878.94	YSQFINFPIYVWSSK	A	2	3.6662
Serial#	Gi	Protein Name	Comment	# identified peptides	Sources
12	15021381	transferin [Homo sapiens]		16	D,C,B,A
	62897069	transferrin variant [Homo sapiens]			> Score >	Mass	Sequence	Sources	charge	xCorr	3	11	11	7
				1	84	978.489	DGAGDVAFVK	B	2	2.7688
				2	82	1491.76	SKEFQLFSSPHGK	C	3	3.7078
				3	90	997.456	ASYLDC(+57)IR	B,D	2	2.6395
				4	96 89	1249.61	SASDLTWDNLK	B,C,D	2	3.9805
				5	87 78	1881.86	ADRDQYELLC(+57)LDNTR	C	3	3.8392
				6	94	1273.65	HSTIFENLANK	A,B,C,D	2	4.071
				7	88	1273.65	HSTIFENLANK	D	2	4.071
				8	91 86	1276.63	EFQLFSSPHGK	A,B,C	2	3.7043
				9	94	1283.57	EGYYGYTGAFR	B,C	2	3.1307
				10	87	1354.61	DYELLC(+57)LDGTR	B	2	2.8937
				11	70	1415.7	SVIPSDGPSVAC(+57)VK	B,C,D	2	3.008
				12	85	1494.73	M(+16)YLGYEYVTAIR	B	2	4.1648
				13	92	1531.64	C(+57)STSSLLEAC(+57)TFR	C	2	2.8731
				14	98	1577.64	FDEFFSEGC(+57)APGSK	A,B,C,D	2	5.0908
				15	75	1593.82	TAGWNIPM(+16)GLLYNK	C	2	3.2544
				16	96	1629.82	EDPQTFYYAVAVVK	B,C,D	2	4.9107
				17	87	1725.72	IEC(+57)VSAETTEDC(+57)IAK	D	2	3.4879
Serial#	Gi	Protein Name	Comment	# identified peptides	Sources
13	37852	vimentin [Homo sapiens]		15	D,C,B,A
	21040384	Vimentin [Homo sapiens]			> Score >	Mass	Sequence	Sources	charge	xCorr	14	14	12	10
				1	87	1495.79	TYSLGSALRPSTSR	A,B,C,D	3	2.325
				2	79	1115.57	VELQELNDR	B	2	3.1416
				3	95 86	1115.57	VELQELNDR	A,B,C,D	2	3.1416
				4	98 89	1169.71	ILLAELEQLK	A,B,C	2	4.1688
				5	83	1254.57	LGDLYEEEMR	C	2	3.794
				6	80	1254.57	LGDLYEEEMR	B	2	3.794
				7	85	1270.57	LGDLYEEEM(+16)R	A,C	2	3.794
				8	93	1309.61	NLQEAEEWYK	A,B,C,D	2	4.1736
				9	94 91	1311.67	M(+16)ALDIEIATYR	A,C	2	4.2466
				10	99	1323.62	EEAENTLQSFR	A,B,C,D	2	3.4602
				11	96	1405.76	VESLQEEIAFLK	A,B,D	2	4.8631
				12	82	1405.76	VESLQEEIAFLK	B	2	4.8631
				13	90	1428.71	SLYASSPGGVYATR	A,B,C,D	2	3.9289
				14	93	1490.73	QVQSLTC(+57)EVDALK	A,B,C,D	2	4.7988
				15	97	1533.85	KVESLQEEIAFLK	A,B,C,D	2	5.4045
				16	97	1570.89	ISLPLPNFSSLNLR	A,B,C,D	2	3.6131
				17	96	1587.8	TNEKVELQELNDR	B	2	4.1115
				18	80	1668.84	ETNLDSLPLVDTHSK	A,B,C,D	2	4.2025
				19	93	1836.8	DGQVINETSQHHDDLE	A,B	2	3.9746
Serial#	Gi	Protein Name	Comment	# identified peptides	Sources
14	4378804	hemoglobin beta chain [Homo sapiens]		10	D,C,B
	6003534	hemoglobin beta subunit variant [Homo sapiens]
	71727271	beta globin [Homo sapiens]
	55635219	PREDICTED: similar to beta globin; hemoglobin beta chain; beta globin mutant; beta globin chain [Pan ...			> Score >	Mass	Sequence	Sources	charge	xCorr	0	10	10	9
				1	96	932.52	SAVTALWGK	B,C,D	2	3.3028
				2	82	1449.8	VVAGVANALAHKYH	B,C	3	1.9779
				3	80 72	1478.67	GTFATLSELHC(+57)DK	B,C,D	2	3.7507
				4	96	1126.56	LHVDPENFR	B,C,D	2	2.5882
				5	97	1149.67	VVAGVANALAHK	B,C,D	2	3.7145
				6	84	1149.67	VVAGVANALAHK	D	2	3.7145
				7	82	1149.67	VVAGVANALAHK	C	2	3.7145
				8	86	1149.67	VVAGVANALAHK	D	2	3.7145
				9	93 90	1797.99	KVLGAFSDGLAHLDNLK	B,C,D	2	1.8372
				10	73 73	1797.99	KVLGAFSDGLAHLDNLK	C	2	1.8372
				11	95	1274.73	LLVVYPWTQR	B,C,D	2	3.9098
				12	93	1314.66	VNVDEVGGEALGR	B,C,D	2	4.7339
				13	81	1314.66	VNVDEVGGEALGR	C	2	4.7339
				14	81	1314.66	VNVDEVGGEALGR	B	2	4.7339
				15	83	1314.66	VNVDEVGGEALGR	B	2	4.7339
				16	80	1314.66	VNVDEVGGEALGR	C	2	4.7339
				17	83	1314.66	VNVDEVGGEALGR	C	2	4.7339
				18	86	1314.66	VNVDEVGGEALGR	C	2	4.7339
				19	83	1314.66	VNVDEVGGEALGR	C	2	4.7339
				20	80	1314.66	VNVDEVGGEALGR	C	2	4.7339
				21	84	1314.66	VNVDEVGGEALGR	C	2	4.7339
				22	80	1314.66	VNVDEVGGEALGR	B,C,D	2	4.7339
				23	96 86	1378.7	EFTPPVQAAYQK	B,C,D	2	3.1154
				24	99	1478.67	GTFATLSELHC(+57)DK	B,C,D	2	3.7507
				25	76	1478.67	GTFATLSELHC(+57)DK	C	2	3.7507
				26	99	1669.89	VLGAFSDGLAHLDNLK	B,C,D	2	5.5631
				27	72	1669.89	VLGAFSDGLAHLDNLK	C	2	5.5631
				28	86	932.52	SAVTALWGK	B,C,D	2	3.3028
Serial#	Gi	Protein Name	Comment	# identified peptides	Sources
15	16306978	Annexin A2, isoform 2 [Homo sapiens]		14	D,C,B,A
	73909156	ANXA2 protein [Homo sapiens]
	50845388	annexin A2 isoform 1 [Homo sapiens]
	30962842	Annexin A2, isoform 2 [Homo sapiens]
	18645167	ANXA2 protein [Homo sapiens]
	62896643	annexin A2 isoform 2 variant [Homo sapiens]			> Score >	Mass	Sequence	Sources	charge	xCorr	11	10	1	4
				1	96	1222.6	TPAQYDASELK	B	2	3.9126
				2	93	1844.9	LSLEGDHSTPPSAYGSVK	A,B,D	3	3.1359
				3	96	1939.96	TDLEKDIISDTSGDFRK	A,B	3	6.0607
				4	73	2012.96	SLYYYIQQDTKGDYQK	A	3	1.9521
				5	81	1353.66	DIISDTSGDFRK	B	2	3.6159
				6	95	1353.66	DIISDTSGDFRK	A	2	3.6159
				7	94	2064.98	RAEDGSVIDYELIDQDAR	B	3	4.0814
				8	76	1421.69	SLYYYIQQDTK	A	2	4.0983
				9	95	1421.69	SLYYYIQQDTK	A,B,C,D	2	4.0983
				10	77	2155.07	AYTNFDAERDALNIETAIK	A	3	2.8275
				11	80	1476.67	SYSPYDM(+16)LESIR	B	2	1.8148
				12	99	1542.85	GVDEVTIVNILTNR	A,B,D	2	5.1488
				13	96	1777.84	GLGTDEDSLIEIIC(+57)SR	A,B	2	4.3998
				14	87	1811.87	TDLEKDIISDTSGDFR	A	2	4.075
				15	89	2770.3	AEDGSVIDYELIDQDARDLYDAGVK	A
				16	97	1908.88	AEDGSVIDYELIDQDAR	A,B,D	2	4.8279
Serial#	Gi	Protein Name	Comment	# identified peptides	Sources
16	62663604	PREDICTED: similar to Histone H2B 291B [Rattus norvegicus]		11	D,C,B,A
					> Score >	Mass	Sequence	Sources	charge	xCorr	4	11	7	10
				1	90 90	953.603	LLLPGELAK	A,B,C,D	2	2.3234
				2	85	1438.8	KTVTAMDVVYALK	B	2	4.3656
				3	92	989.578	VFLENVIR	A,B,C,D	2	3.4474
				4	94	1134.54	DAVTYTEHAK	B,D	2	2.9067
				5	77	1134.54	DAVTYTEHAK	B	2	2.9067
				6	78	1134.54	DAVTYTEHAK	D	2	2.9067
				7	97 89	1180.62	ISGLIYEETR	A,B,C,D	2	3.6373
				8	97	1265.64	KESYSVYVYK	B,C,D	2	3.4192
				9	70	1265.64	KESYSVYVYK	B	2	3.4192
				10	99	1310.7	TVTAMDVVYALK	B,C,D	2	3.7663
				11	97	1325.75	DNIQGITKPAIR	B,C,D	2	3.1816
				12	87	1325.75	DNIQGITKPAIR	D	2	3.1816
				13	82	1326.7	TVTAM(+16)DVVYALK	C	2	3.7663
				14	95	1326.7	TVTAM(+16)DVVYALK	B,D	2	3.7663
				15	81	714.346	TLYGFGG	B,D	1	1.84
				16	89 89	1438.8	KTVTAMDVVYALK	B	2	4.3656
				17	84	1438.8	KTVTAMDVVYALK	B	2	4.3656
				18	90	1466.8	TVTAMDVVYALKR	B	2	3.0965
				19	97	1466.8	TVTAMDVVYALKR	B,D	2	3.0965
				20	97 89	1743.82	AMGIMNSFVNDIFER	A,B,C,D	2	5.4678
				21	85	1759.82	AM(+16)GIMNSFVNDIFER	B	2	5.4678
				22	97 95	1759.82	AM(+16)GIMNSFVNDIFER	A,B,C,D	2	5.4678
				23	82	1759.82	AM(+16)GIMNSFVNDIFER	B	2	5.4678
				24	80	1775.82	AM(+16)GIM(+16)NSFVNDIFER	D	2	5.4678
				25	93 89	1775.82	AM(+16)GIM(+16)NSFVNDIFER	A,B,C,D	2	5.4678
				26	71	1775.82	AM(+16)GIM(+16)NSFVNDIFER	D	2	5.4678
				27	77 74	953.603	LLLPGELAK	B,C,D	2	2.3234
Serial#	Gi	Protein Name	Comment	# identified peptides	Sources
17	13325287	Enolase 1 [Homo sapiens]		10	D,C,B,A
	62896593	enolase 1 variant [Homo sapiens]
	62897945	enolase 1 variant [Homo sapiens]			> Score >	Mass	Sequence	Sources	charge	xCorr	7	9	7	6
				1	95	1143.62	IGAEVYHNLK	B	2	2.8631
				2	72	1296.59	LM(+16)IEMDGTENK	B	2	2.2253
				3	95 91	1406.72	GNPTVEVDLFTSK	A,B,C,D	2	4.1935
				4	82 79	1406.72	GNPTVEVDLFTSK	D	2	4.1935
				5	90	1425.73	YISPDQLADLYK	A,B,C,D	2	4.1291
				6	94	1556.78	VVIGM(+16)DVAASEFFR	A,B,C	2	4.129
				7	99 99	1633.8	VNQIGSVTESLQAC(+57)K	A,B,C,D	2	5.0011
				8	96	1804.94	AAVPSGASTGIYEALELR	A,B,C,D	2	5.5798
				9	82	1923.99	LAM(+16)QEFMILPVGAANFR	B	2	4.155
				10	78	1939.99	LAM(+16)QEFM(+16)ILPVGAANFR	A,B,D	2	4.155
				11	95	1960.92	DATNVGDEGGFAPNILENK	A,B,C,D	2	5.4109
				12	90	2510.11	DYPVVSIEDPFDQDDWGAWQK	C	2	4.2438
Serial#	Gi	Protein Name	Comment	# identified peptides	Sources
18	57165052	thyroid autoantigen 70kDa (Ku antigen) [Homo sapiens]		11	D,C,B,A
					> Score >	Mass	Sequence	Sources	charge	xCorr	10	10	2	6
				1	93 90	1005.56	ILELDQFK	A,C	2	2.9509
				2	88	1007.54	LGSLVDEFK	B,D	2	3.629
				3	74	1172.69	KQELLEALTK	D	2	3.5874
				4	87 86	1172.69	KQELLEALTK	A,B	2	3.5874
				5	91	1207.66	DSLIFLVDASK	A,B	2	3.2788
				6	84 80	1902.87	IMLFTNEDNPHGNDSAK	A,B	3	2.8276
				7	89 89	1918.87	IM(+16)LFTNEDNPHGNDSAK	A,B,D	3	2.8276
				8	92	1354.72	DLLAVVFYGTEK	A,B	2	4.5316
				9	97	1388.69	DIISIAEDEDLR	A,B	2	3.9654
				10	95	1520.73	ELVYPPDYNPEGK	A,B,D	2	3.8104
				11	99	1573.82	NIYVLQELDNPGAK	A,B	2	5.3539
				12	87	1651.85	TFNTSTGGLLLPSDTK	A,B,C,D	2	4.6438
				13	84	2501	TEGDEEAEEEQEENLEASGDYK	A	2	5.5728
				14	88	2501	TEGDEEAEEEQEENLEASGDYK	A	2	5.5728
				15	84	2501	TEGDEEAEEEQEENLEASGDYK	B	2	5.5728
				16	87	2501	TEGDEEAEEEQEENLEASGDYK	D	2	5.5728
Serial#	Gi	Protein Name	Comment	# identified peptides	Sources
19	48145549	PGK1 [Homo sapiens]		11	D,C,B,A
	41350401	migration-inducing gene 10 protein [Homo sapiens]			> Score >	Mass	Sequence	Sources	charge	xCorr	8	5	1	4
				1	78	965.481	VDFNVPM(+16)K	A	2	2.1135
				2	86	1740.91	VSHVSTGGGASLELLEGK	A	2	4.5454
				3	92	1769	ALESPERPFLAILGGAK	A,B	3	3.8086
				4	92 90	1201.66	IQLINNMLDK	A,D	2	3.3229
				5	89 85	1217.66	IQLINNM(+16)LDK	A,D	2	3.3229
				6	95	1247.69	YSLEPVAVELK	A,B,C,D	2	3.4219
				7	87	1318.72	ITLPVDFVTADK	A,B	2	3.0807
				8	89	2035.05	SVVLMSHLGRPDGVPMPDK	D	3	2.6536
				9	86 86	1367.71	AHSSMVGVNLPQK	A	2	2.6654
				10	94	1634.79	LGDVYVNDAFGTAHR	B	2	4.2842
				11	95	1740.91	VSHVSTGGGASLELLEGK	D	2	4.5454
				12	76	1759.89	VNEM(+16)IIGGGM(+16)AFTFLK	A	2	2.1711
				13	86	2023.04	ITLPVDFVTADKFDENAK	B	2	2.903
Serial#	Gi	Protein Name	Comment	# identified peptides	Sources
20	16554039	unnamed protein product [Homo sapiens]		5	D,C,B,A
					> Score >	Mass	Sequence	Sources	charge	xCorr	5	4	5	5
				1	92	1677.8	FNWYVDGVEVHNAK	A,C,D	2	5.5559
				2	92	1186.65	GPSVFPLAPSSK	A,B,C,D	2	3.1743
				3	98	1321.66	STSGGTAALGC(+57)LVK	A,B,C,D	2	3.8711
				4	88	1321.66	STSGGTAALGC(+57)LVK	A	2	3.8711
				5	80	1321.66	STSGGTAALGC(+57)LVK	D	2	3.8711
				6	85	1321.66	STSGGTAALGC(+57)LVK	C	2	3.8711
				7	90	1321.66	STSGGTAALGC(+57)LVK	A	2	3.8711
				8	90	2139.01	TPEVTC(+57)VVVDVSHEDPEVK	A,C,D	3	4.7512
				9	77	2139.01	TPEVTC(+57)VVVDVSHEDPEVK	B	3	4.7512
				10	94	1677.8	FNWYVDGVEVHNAK	A,C,D	2	5.5559
				11	95	1743.86	YAASSYLSLTPEQWK	A,B,C,D	2	4.6276
Serial#	Gi	Protein Name	Comment	# identified peptides	Sources
21	14043359	L-plastin [Homo sapiens]		10	D,C,B,A
	62898171	L-plastin variant [Homo sapiens]
	8217500	lymphocyte cytosolic protein 1 (L-plastin) [Homo sapiens]			> Score >	Mass	Sequence	Sources	charge	xCorr	7	7	4	7
				1	85	994.52	IGNFSTDIK	B,D	2	3.2316
				2	81	1518.75	M(+16)INLSVPDTIDER	A,B	2	3.088
				3	92	1534.81	YTLNILEEIGGGQK	A	2	3.8952
				4	96	1585.85	VYALPEDLVEVNPK	A,B,C,D	2	4.6326
				5	90	1675.84	FSLVGIGGQDLNEGNR	C,D	2	4.3982
				6	77	1743.86	GDEEGVPAVVIDMSGLR	A,B,D	2	4.2888
				7	93	1799.93	VNDDIIVNWVNETLR	A,B,C,D	2	5.1179
				8	95	2770.19	EGIC(+57)AIGGTSEQSSVGTQHSYSEEEK	A,B	3	4.3249
				9	79	1877.86	EITENLMATGDLDQDGR	B,D	2	3.8985
				10	83	2698.49	ISTSLPVLDLIDAIQPGSINYDLLK	A,C,D	2	4.5031
Serial#	Gi	Protein Name	Comment	# identified peptides	Sources
22	29244126	H2A histone family, member J [Mus musculus]		5	D,C,B,A
	62663594	PREDICTED: similar to Histone H2A.1 [Rattus norvegicus]
	62663598	PREDICTED: similar to H2A histone family, member E [Rattus norvegicus]
	62663600	PREDICTED: similar to Histone H2A.1 [Rattus norvegicus]
	76689692	PREDICTED: similar to histone 1, H2ad [Bos taurus]
	55589502	PREDICTED: similar to Histone H2A.1 [Pan troglodytes]
	55625972	PREDICTED: similar to Histone H2A.l (H2A/l) [Pan troglodytes]
	76651181	PREDICTED: similar to Histone H2A.1 [Bos taurus]
	32111	unnamed protein product [Homo sapiens]
	74004250	PREDICTED: similar to Histone H2A.l (H2A/l) [Canis familiaris]
	56205275	OTTMUSP00000000536 [Mus musculus]
	56237952	RP23-9O16.9 [Mus musculus]
	56205266	OTTMUSP00000000456 [Mus musculus]
	51304	unnamed protein product [Mus musculus]			> Score >	Mass	Sequence	Sources	charge	xCorr	2	5	3	2
				1	96 87	944.531	AGLQFPVGR	A,B,C,D	2	3.1243
				2	92 92	1692.9	HLQLAIRNDEELNK	B	3	3.4877
				3	85	1300.69	NDEELNKLLGR	B,C	2	3.9131
				4	87	1931.17	VTIAQGGVLPNIQAVLLPK	A,B,C,D	2	4.6374
				5	80	2915.59	VGAGAPVYLAAVLEYLTAEILELAGNAAR	B	2	4.3223
				6	82	2915.59	VGAGAPVYLAAVLEYLTAEILELAGNAAR	B	2	4.3223
Serial#	Gi	Protein Name	Comment	# identified peptides	Sources
23	20799907	histone 2, H2aa1 [Mus musculus]		5	D,C,B,A
	62643918	PREDICTED: similar to histone H2a(A)-613 [Rattus norvegicus]
	62643920	PREDICTED: similar to Hist2h2aa1 protein [Rattus norvegicus]
	62644028	PREDICTED: similar to Hist2h2aa1 protein [Rattus norvegicus]
	94394993	PREDICTED: similar to H2A histone family, member O [Mus musculus]
	94395136	PREDICTED: similar to H2A histone family, member O [Mus musculus]
	94396055	PREDICTED: similar to H2A histone family, member O [Mus musculus]
	37994721	H2A histone family, member Q [Homo sapiens]
	817939	histone H2A [Mus musculus domesticus]
	28174908	Hist2h2aa1 protein [Mus musculus]			> Score >	Mass	Sequence	Sources	charge	xCorr	2	4	3	4
				1	96 87	944.531	AGLQFPVGR	A,B,C,D	2	3.1243
				2	92 92	1692.9	HLQLAIRNDEELNK	B	3	3.4877
				3	93	1272.68	NDEELNKLLGK	B,C,D	2	3.7542
				4	85	1272.68	NDEELNKLLGK	B	2	3.7542
				5	87	1931.17	VTIAQGGVLPNIQAVLLPK	A,B,C,D	2	4.6374
				6	87	2949.54	VGAGAPVYM(+16)AAVLEYLTAEILELAGNAAR	D	2	5.0011
Serial#	Gi	Protein Name	Comment	# identified peptides	Sources
24	54035059	Lamin A/C, isoform 1 precursor [Homo sapiens]		10	D,C,B,A
	74148166	unnamed protein product [Mus musculus]
	15929761	Lamin A, isoform A [Mus musculus]
	50355692	lamin A isoform A [Mus musculus]
	57014043	lamin A/C transcript variant 1 [Homo sapiens]			> Score >	Mass	Sequence	Sources	charge	xCorr	9	9	2	2
				1	95	1002.55	DLEALLNSK	A	2	2.7775
				2	96	1028.57	LADALQELR	A,B	2	4.0006
				3	90	1119.59	EAALSTALSEK	A,B,C	2	2.6122
				4	83	1752.86	NSNLVGAAHEELQQSR	A,B	2	5.1415
				5	94	1182.61	TLEGELHDLR	A,B	2	3.2287
				6	73	1187.64	LRDLEDSLAR	B	2	2.5482
				7	94	1430.79	IDSLSAQLSQLQK	A,B	2	4.1965
				8	84	1430.79	IDSLSAQLSQLQK	A	2	4.1965
				9	92	1491.75	TALINSTGEEVAMR	A,B	2	4.732
				10	93	1491.75	TALINSTGEEVAMR	B	2	4.732
				11	83	1507.75	TALINSTGEEVAM(+16)R	A	2	4.732
				12	96	1566.75	SVGGSGGGSFGDNLVTR	A,B	2	4.222
				13	74	1566.75	SVGGSGGGSFGDNLVTR	C	2	4.222
				14	83	1566.75	SVGGSGGGSFGDNLVTR	B	2	4.222
				15	92	1752.86	NSNLVGAAHEELQQSR	A,B,D	2	5.1415
				16	95	1893.93	MQQQLDEYQELLDIK	A,B	2	6.1953
				17	96	1909.93	M(+16)QQQLDEYQELLDIK	A,B,D	2	6.1953
Serial#	Gi	Protein Name	Comment	# identified peptides	Sources
25	4557385	complement component 3 precursor [Homo sapiens]		9	D,C,B
	89062820	PREDICTED: similar to Complement C3 precursor [Homo sapiens]
	40786791	complement component 3 [Homo sapiens]			> Score >	Mass	Sequence	Sources	charge	xCorr	0	1	9	3
				1	94	1345.7	EVVADSVWVDVK	C	2	3.643
				2	72	1370.73	TIYTPGSTVLYR	C	2	1.3032
				3	71	1401.84	SSLSVPYVIVPLK	C	2	1.8928
				4	97	1470.78	IPIEDGSGEVVLSR	B,C,D	2	4.4037
				5	95	1655.87	TVM(+16)VNIENPEGIPVK	C,D	2	3.9415
				6	95	1657.77	AGDFLEANYM(+16)NLQR	C	2	4.4729
				7	92	1789.84	DIC(+57)EEQVNSLPGSITK	C	2	2.9134
				8	97	1816.89	SNLDEDIIAEENIVSR	C,D	2	4.7249
				9	82 82	1878.97	EYVLPSFEVIVEPTEK	C	2	4.4085
Serial#	Gi	Protein Name	Comment	# identified peptides	Sources
26	38201710	DEAD box polypeptide 17 isoform p82 [Homo sapiens]		6	D,B,A
	76616885	PREDICTED: similar to Probable RNA-dependent helicase p72 (DEAD-box protein p72) (DEAD-box protein 1 ...
	76616887	PREDICTED: similar to DEAD box polypeptide 17 isoform 1 isoform 8 [Bos taurus]
	76616889	PREDICTED: similar to DEAD box polypeptide 17 isoform 1 isoform 9 [Bos taurus]
	76616891	PREDICTED: similar to Probable RNA-dependent helicase p72 (DEAD-box protein p72) (DEAD-box protein 1 ...
	93587673	DEAD box polypeptide 17 isoform 4 [Mus musculus]
	40068493	DEAD box polypeptide 17 isoform 1 [Mus musculus]
	62088770	DEAD box polypeptide 17 isoform p82 variant [Homo sapiens]
	12653635	DDX17 protein [Homo sapiens]
	47678395	DDX17 [Homo sapiens]
	52545677	hypothetical protein [Homo sapiens]			> Score >	Mass	Sequence	Sources	charge	xCorr	3	6	0	1
				1	77	1021.56	LIDFLESGK	B	2	2.6128
				2	97	1226.71	APILIATDVASR	A,B,D	2	3.9858
				3	75	1368.64	M(+16)LDM(+16)GFEPQIR	A,B	2	3.3986
				4	80	2117.96	FVINYDYPNSSEDYVHR	B	3	2.6692
				5	92	1479.75	LIQLM(+16)EEIM(+16)AEK	B	2	3.369
				6	99	1691.82	ELAQQVQQVADDYGK	A,B	2	4.7874
Serial#	Gi	Protein Name	Comment	# identified peptides	Sources
27	1835122	dead-box RNA helicase [Mus musculus]		5	B,A
	62659916	PREDICTED: similar to probable ATP-dependent RNA helicase - mouse [Rattus norvegicus]
	62666532	PREDICTED: similar to RNA helicase [Rattus norvegicus]
	76659559	PREDICTED: similar to DEAD-box protein 3, X-chromosomal (Helicase-like protein 2) (HLP2) (DEAD-box, ...
	76659561	PREDICTED: similar to DEAD-box protein 3, X-chromosomal (Helicase-like protein 2) (HLP2) (DEAD-box, ...
	76659563	PREDICTED: similar to DEAD/H (Asp-Glu-Ala-Asp/His) box polypeptide 3 isoform 1 [Bos taurus]
	76659565	PREDICTED: similar to DEAD-box protein 3, X-chromosomal (Helicase-like protein 2) (HLP2) (DEAD-box, ...
	76659567	PREDICTED: similar to DEAD-box protein 3, X-chromosomal (Helicase-like protein 2) (HLP2) (DEAD-box, ...
	14861844	PL10 protein [Mus musculus]
	62087546	DEAD/H (Asp-Glu-Ala-Asp/His) box polypeptide 3 variant [Homo sapiens]
	87196351	DEAD/H (Asp-Glu-Ala-Asp/His) box polypeptide 3 [Homo sapiens]
	2580552	dead box, X isoform [Homo sapiens]
	2580556	dead box, Y isoform [Homo sapiens]
	13514809	DEAD (Asp-Glu-Ala-Asp) box polypeptide 3, Y-linked [Homo sapiens]			> Score >	Mass	Sequence	Sources	charge	xCorr	3	4	0	0
				1	92 88	1128.65	DLLDLLVEAK	B	2	3.7607
				2	90	1168.7	SPILVATAVAAR	B	2	3.8688
				3	83	1320.68	ELAVQIYEEAR	B	2	2.311
				4	80	1320.68	ELAVQIYEEAR	A	2	2.311
				5	75	1368.64	M(+16)LDM(+16)GFEPQIR	A,B	2	3.3986
				6	85	1882.92	LEQELFSGGNTGINFEK	A	2	4.4531
Serial#	Gi	Protein Name	Comment	# identified peptides	Sources
28	33286420	pyruvate kinase 3 isoform 2 [Homo sapiens]		10	D,C,B,A
	33873708	Unknown (protein for IMAGE:4299213) [Homo sapiens]
	33875497	Unknown (protein for IMAGE:2964687) [Homo sapiens]
	33870117	Unknown (protein for IMAGE:2958817) [Homo sapiens]
	14043291	Pyruvate kinase 3, isoform 1 [Homo sapiens]
	62897413	pyruvate kinase 3 isoform 1 variant [Homo sapiens]
	35505	pyruvate kinase [Homo sapiens]			> Score >	Mass	Sequence	Sources	charge	xCorr	8	8	1	4
				1	81	1019.52	GDYPLEAVR	A	2	2.2581
				2	96 90	1141.61	GDLGIEIPAEK	A,B	2	3.5715
				3	92	1197.65	LDIDSPPITAR	A,D	2	3.7165
				4	85	1197.65	LDIDSPPITAR	B	2	3.7165
				5	77	1197.58	ITLDNAYMEK	A	2	2.1645
				6	94	1359.68	NTGIIC(+57)TIGPASR	A,B	2	4.2903
				7	81	1359.68	NTGIIC(+57)TIGPASR	C	2	4.2903
				8	89	1462.82	IYVDDGLISLQVK	A,B	2	4.8731
				9	99	1636.89	GVNLPGAAVDLPAVSEK	B,D	2	4.5861
				10	81	2465.29	TATESFASDPILYRPVAVALDTK	A,B,D	3	3.8402
				11	82	1779.88	GADFLVTEVENGGSLGSK	B	2	4.971
				12	89	1779.88	GADFLVTEVENGGSLGSK	A	2	4.971
				13	92	1779.88	GADFLVTEVENGGSLGSK	D	2	4.971
				14	84	1875.9	FGVEQDVDM(+16)VFASFIR	B	2	3.2336
Serial#	Gi	Protein Name	Comment	# identified peptides	Sources
29	4757810	ATP synthase, H+ transporting, mitochondrial F1 complex, alpha subunit precursor [Homo sapiens]		9	D,C,B,A
	74139457	unnamed protein product [Mus musculus]
	74211977	unnamed protein product [Mus musculus]
	74211072	unnamed protein product [Mus musculus]
	74146998	unnamed protein product [Mus musculus]
	6680748	ATP synthase, H+ transporting, mitochondrial F1 complex, alpha subunit, isoform 1 [Mus musculus]
	15030240	ATP synthase, H+ transporting, mitochondrial F1 complex, alpha subunit, precursor [Homo sapiens]
	24660110	ATP synthase, H+ transporting, mitochondrial F1 complex, alpha subunit, precursor [Homo sapiens]			> Score >	Mass	Sequence	Sources	charge	xCorr	5	8	4	7
				1	95 91	1000.58	VLSIGDGIAR	A,B	2	2.9131
				2	90	1026.59	AVDSLVPIGR	A,B,C,D	2	2.9138
				3	81	1553.74	EAYPGDVFYLHSR	B,D	3	1.3991
				4	92	1171.63	VVDALGNAIDGK	A,D	2	3.8405
				5	89	1287.69	HALIIYDDLSK	B,D	2	3.7985
				6	97	1423.67	TGTAEMSSILEER	B,C,D	2	4.1887
				7	99	1575.79	ILGADTSVDLEETGR	A,B,C,D	2	4.8227
				8	96	1624.89	TGAIVDVPVGEELLGR	A,B,C,D	2	4.7194
				9	86 81	1683.8	NVQAEEM(+16)VEFSSGLK	B	2	2.6476
Serial#	Gi	Protein Name	Comment	# identified peptides	Sources
30	15215412	Annexin 5 [Homo sapiens]		9	C,B,A
					> Score >	Mass	Sequence	Sources	charge	xCorr	6	4	2	0
				1	91	1001.6	VLTEIIASR	A,B	2	2.7628
				2	99 89	1106.58	SEIDLFNIR	B,C	2	3.4956
				3	95	1290.64	NFATSLYSM(+16)IK	A	2	3.3638
				4	78	1340.61	GTVTDFPGFDER	C	2	2.2396
				5	89	1613.91	ETSGNLEQLLLAVVK	A	2	4.1007
				6	82	1613.91	ETSGNLEQLLLAVVK	B	2	4.1007
				7	84	1704.9	GLGTDEESILTLLTSR	B	2	3.9348
				8	79	1749.88	SIPAYLAETLYYAM(+16)K	A	2	3.1769
				9	95	2658.25	DPDAGIDEAQVEQDAQALFQAGELK	A	2	4.1162
				10	90	2888.24	QVYEEEYGSSLEDDVVGDTSGYYQR	A	2	5.0093
Serial#	Gi	Protein Name	Comment	# identified peptides	Sources
31	21748542	FLJ00343 protein [Homo sapiens]		9	B,A
	4503745	filamin 1 (actin-binding protein-280) [Homo sapiens]
	57284201	filamin A, alpha (actin binding protein 280) [Homo sapiens]
	53791219	filamin A [Homo sapiens]
	53791221	filamin A [Homo sapiens]
	57284202	filamin A, alpha (actin binding protein 280) [Homo sapiens]
	57284203	filamin A, alpha (actin binding protein 280) [Homo sapiens]			> Score >	Mass	Sequence	Sources	charge	xCorr	7	2	0	0
				1	88	1415.75	IANLQTDLSDGLR	B	2	3.1403
				2	77	1426.75	EAGAGGLAIAVEGPSK	A	2	2.602
				3	86	1434.72	ANLPQSFQVDTSK	A	2	2.7016
				4	84	1500.75	DAGEGGLSLAIEGPSK	B	2	3.4209
				5	83	1533.82	SPFSVAVSPSLDLSK	A	2	2.9408
				6	95	1570.81	GAGTGGLGLAVEGPSEAK	A	2	4.1623
				7	91	1763.86	VANPSGNLTETYVQDR	A	2	4.5123
				8	80	1909.92	EGPYSISVLYGDEEVPR	A	2	3.1087
				9	71	2544.26	GLVEPVDVVDNADGTQTVNYVPSR	A	2	4.6898
Serial#	Gi	Protein Name	Comment	# identified peptides	Sources
32	54695780	serine (or cysteine) proteinase inhibitor, clade A (alpha-1 antiproteinase, antitrypsin), member 1 [ ...		8	D,C,B,A
					> Score >	Mass	Sequence	Sources	charge	xCorr	4	3	7	1
				1	97	1015.62	SVLGQLGITK	C	2	3.4384
				2	86	1803.96	LQHLENELTHDIITK	A,C	3	4.3968
				3	82 72	1863.82	DTEEEDFHVDQATTVK	C	2	5.2092
				4	72	1863.82	DTEEEDFHVDQATTVK	B	2	5.2092
				5	88	1576.84	DTVFALVNYIFFK	C	2	3.203
				6	86	1641.86	ITPNLAEFAFSLYR	A	2	3.458
				7	85 75	888.504	AVLTIDEK	C	1	1.9183
				8	94	1833.92	VFSNGADLSGVTEEAPLK	A,B,C,D	2	5.1136
				9	80	1863.82	DTEEEDFHVDQATTVK	C	2	5.2092
				10	96	1863.82	DTEEEDFHVDQATTVK	B,C	2	5.2092
				11	84	2574.34	TLNQPDSQLQLTTGNGLFLSEGLK	C	2	5.5267
				12	99	2574.34	TLNQPDSQLQLTTGNGLFLSEGLK	A,C	2	5.5267
				13	82	2574.34	TLNQPDSQLQLTTGNGLFLSEGLK	B	2	5.5267
Serial#	Gi	Protein Name	Comment	# identified peptides	Sources
33	2644968	hnRNP-K protein [Oryctolagus cuniculus]		7	D,C,B,A
	26353476	unnamed protein product [Mus musculus]
	74195705	unnamed protein product [Mus musculus]
	74144445	unnamed protein product [Mus musculus]
	74177637	unnamed protein product [Mus musculus]
	74198765	unnamed protein product [Mus musculus]
	74225344	unnamed protein product [Mus musculus]
	15929044	Heterogeneous nuclear ribonucleoprotein K, isoform b [Homo sapiens]
	62088704	heterogeneous nuclear ribonucleoprotein K isoform a variant [Homo sapiens]
	460789	transformation upregulated nuclear protein [Homo sapiens]
	74354615	Heterogeneous nuclear ribonucleoprotein K [Bos taurus]
	38197650	Hnrpk protein [Rattus norvegicus]
	59381084	heterogeneous nuclear ribonucleoprotein K transcript variant [Homo sapiens]
	55958544	heterogeneous nuclear ribonucleoprotein K [Homo sapiens]			> Score >	Mass	Sequence	Sources	charge	xCorr	6	6	4	3
				1	92 90	1053.64	VVLIGGKPDR	B	2	2.6882
				2	94	1194.7	NLPLPPPPPPR	A,B	2	1.9675
				3	72	1194.7	NLPLPPPPPPR	B	2	1.9675
				4	76	1194.7	NLPLPPPPPPR	A	2	1.9675
				5	85	1259.58	IDEPLEGSEDR	A	2	3.4444
				6	95	1340.8	IILDLISESPIK	B,C,D	2	4.7547
				7	81	1340.8	IILDLISESPIK	A	2	4.7547
				8	89	2589.39	IITITGTQDQIQNAQYLLQNSVK	B	2	4.2387
				9	89	2589.39	IITITGTQDQIQNAQYLLQNSVK	A	2	4.2387
				10	91	1780.8	TDYNASVSVPDSSGPER	A,B,C,D	2	3.5565
				11	96	1917.03	GSYGDLGGPIITTQVTIPK	A,B,C,D	2	4.9034
				12	77	2589.39	IITITGTQDQIQNAQYLLQNSVK	A	2	4.2387
				13	91	2589.39	IITITGTQDQIQNAQYLLQNSVK	C	2	4.2387
Serial#	Gi	Protein Name	Comment	# identified peptides	Sources
34	34234	laminin-binding protein [Homo sapiens]		2	B,A
	34272	unnamed protein product [Homo sapiens]
	38014840	Laminin receptor 1 [Rattus norvegicus]
	51770420	PREDICTED: similar to 40S ribosomal protein SA (p40) (34/67 kDa laminin receptor) [Mus musculus]
	82994829	PREDICTED: similar to 40S ribosomal protein SA (p40) (34/67 kDa laminin receptor) [Mus musculus]
	68534141	Laminin receptor 1 (ribosomal protein SA) [Mus musculus]
	31419811	Ribosomal protein SA [Homo sapiens]
	28189773	similar to 40S ribosomal protein SA (P40) [Bos taurus]
	62024907	Rpsa protein [Mus musculus]
	47125390	Ribosomal protein SA [Homo sapiens]
	12846904	unnamed protein product [Mus musculus]
	31560560	laminin receptor 1 (ribosomal protein SA) [Mus musculus]
	14583014	laminin receptor-like protein LAMRL5 [Homo sapiens]
	73587277	Laminin receptor 1 (ribosomal protein SA, 67 kDA) [Bos taurus]
	250127	67 kda laminin receptor [Homo sapiens]
	44890755	Ribosomal protein SA [Homo sapiens]
	94391424	PREDICTED: similar to 40S ribosomal protein SA (p40) (34/67 kDa laminin receptor) [Mus musculus]			> Score >	Mass	Sequence	Sources	charge	xCorr	2	1	0	0
				1	74	1698.86	FTPGTFTNQIQAAFR	A,B	2	3.6929
				2	86	1740.95	AIVAIENPADVSVISSR	A	2	4.2397
Serial#	Gi	Protein Name	Comment	# identified peptides	Sources
35	15126742	Lamin B1 [Homo sapiens]		9	D,C,B,A
	74354337	Lamin B1 [Homo sapiens]			> Score >	Mass	Sequence	Sources	charge	xCorr	5	8	3	4
				1	87 84	1414.73	AEHDQLLLNYAK	A,B	3	3.1325
				2	90	1045.55	DAALATALGDK	D	2	3.3604
				3	89 79	1171.66	IQELEDLLAK	B	2	2.7778
				4	87	1251.62	ALYETELADAR	B	2	2.6177
				5	79	1251.62	ALYETELADAR	A	2	2.6177
				6	92	1297.65	LALDM(+16)EISAYR	B	2	3.7002
				7	90	1397.62	C(+57)QSLTEDLEFR	B	2	3.0362
				8	97	1446.78	IESLSSQLSNLQK	A,B,C,D	2	4.4466
				9	71	2528.31	SLEGDLEDLKDQIAQLEASLAAAK	C	2	4.4861
				10	92	2528.31	SLEGDLEDLKDQIAQLEASLAAAK	A,B,D	2	4.4861
				11	99	1817.92	SLETENSALQLQVTER	A,B,C,D	2	5.5156
				12	82	2528.31	SLEGDLEDLKDQIAQLEASLAAAK	A	2	4.4861
Serial#	Gi	Protein Name	Comment	# identified peptides	Sources
36	54696396	lactate dehydrogenase B [Homo sapiens]		5	D,C,B,A
					> Score >	Mass	Sequence	Sources	charge	xCorr	3	4	2	2
				1	92 82	1176.59	SADTLWDIQK	A,B	2	2.6264
				2	80	1176.59	SADTLWDIQK	C	2	2.6264
				3	92	1267.66	MVVESAYEVIK	B	2	3.9472
				4	81	1283.66	M(+16)VVESAYEVIK	A,B	2	3.9472
				5	82 81	1947.94	GEM(+16)MDLQHGSLFLQTPK	B	3	2.5837
				6	93	1629.86	SLADELALVDVLEDK	D	2	4.1503
				7	92	1694.9	LIAPVAEEEATVPNNK	A,B,C,D	2	3.6877
Serial#	Gi	Protein Name	Comment	# identified peptides	Sources
37	8393706	lactate dehydrogenase A [Rattus norvegicus]		3	D,B,A
	62653460	PREDICTED: similar to L-lactate dehydrogenase A chain (LDH-A) (LDH muscle subunit) (LDH-M) [Rattus n ...			> Score >	Mass	Sequence	Sources	charge	xCorr	1	2	0	1
				1	81	1118.58	SADTLWGIQK	B	2	2.9449
				2	82 81	1947.97	GEM(+16)MDLQHGSLFLKTPK	B	3	2.5893
				3	96	1657.85	DLADELALVDVIEDK	A,D	2	4.8709
Serial#	Gi	Protein Name	Comment	# identified peptides	Sources
38	55959887	peroxiredoxin 1 [Homo sapiens]		6	D,C,B,A
	54696346	peroxiredoxin 1 [Homo sapiens]			> Score >	Mass	Sequence	Sources	charge	xCorr	6	5	2	3
				1	97 89	920.509	GLFIIDDK	A,B	2	3.3721
				2	89 89	940.462	DISLSDYK	A	2	2.0021
				3	88	1164.57	ATAVMPDGQFK	A,B	2	2.8667
				4	96	1196.63	LVQAFQFTDK	A,B,D	2	3.9179
				5	80	1211.67	QITVNDLPVGR	A,B,C,D	2	3.6711
				6	95	1622.86	QGGLGPMNIPLVSDPK	B	2	4.2718
				7	88	1638.86	QGGLGPM(+16)NIPLVSDPK	A,B,C,D	2	4.2718
Serial#	Gi	Protein Name	Comment	# identified peptides	Sources
39	1617118	TSA [Homo sapiens]		3	D,C,B,A
	33188452	peroxiredoxin 2 isoform b [Homo sapiens]
	438069	thiol-specific antioxidant protein [Homo sapiens]
	77744389	peroxiredoxin 2 [Homo sapiens]			> Score >	Mass	Sequence	Sources	charge	xCorr	3	3	3	3
				1	96	1023.54	LSEDYGVLK	A,B,C,D	2	3.2575
				2	80	1211.67	QITVNDLPVGR	A,B,C,D	2	3.6711
				3	93	1734.97	EGGLGPLNIPLLADVTR	A,B,C,D	2	4.9038
Serial#	Gi	Protein Name	Comment	# identified peptides	Sources
40	15278386	Ubiquitin-activating enzyme E1 [Homo sapiens]		8	D,B,A
	24485	unnamed protein product [Homo sapiens]
	35830	ubiquitin activating enzyme E1 [Homo sapiens]			> Score >	Mass	Sequence	Sources	charge	xCorr	5	6	0	5
				1	78	1243.73	KPLLESGTLGTK	A	2	2.7823
				2	80	1623.91	LAGTQPLEVLEAVQR	A,B,D	2	3.2775
				3	85	1655.79	YDGQVAVFGSDLQEK	B,D	2	4.5484
				4	91	1808.95	ALPAVQQNNLDEDLIR	B	2	3.946
				5	93	1883.95	NEEDAAELVALAQAVNAR	B	2	5.1526
				6	83	1908.99	SLVASLAEPDFVVTDFAK	A,B,D	2	4.4873
				7	86	1933.04	AAVATFLQSVQVPEFTPK	A,B,D	2	3.9995
				8	99	2600.19	IYDDDFFQNLDGVANALDNVDAR	A,D	2	5.6881
Serial#	Gi	Protein Name	Comment	# identified peptides	Sources
41	54792127	ATP synthase, H+ transporting, mitochondrial F1 complex, beta subunit [Rattus norvegicus]		8	D,C,B,A
	28940	unnamed protein product [Homo sapiens]
	94574271	ATP synthase, H+ transporting, mitochondrial F1 complex, beta polypeptide [Bos taurus]
	16741373	ATP synthase, H+ transporting, mitochondrial F1 complex, beta polypeptide [Homo sapiens]			> Score >	Mass	Sequence	Sources	charge	xCorr	2	5	6	3
				1	92	975.562	IGLFGGAGVGK	B	2	3.0987
				2	81	1038.59	IPVGPETLGR	B,C,D	2	2.3564
				3	77	1831.87	IM(+16)DPNIVGSEHYDVAR	B,C,D	3	3.2263
				4	93	1262.64	TIAMDGTEGLVR	C	2	3.7712
				5	87 78	1385.71	IMNVIGEPIDER	A,B,C	2	4.7678
				6	95	1401.71	IM(+16)NVIGEPIDER	A,B,C,D	2	4.7678
				7	95	1439.79	VALTGLTVAEYFR	A,C	2	4.8713
				8	92	1457.84	TVLIMELINNVAK	B	2	4.1198
				9	95	1921.97	DQEGQDVLLFIDNIFR	C	2	5.0814
Serial#	Gi	Protein Name	Comment	# identified peptides	Sources
42	14625824	moesin/anaplastic lymphoma kinase fusion protein [Homo sapiens]		5	D,B,A
	16878176	Moesin [Homo sapiens]			> Score >	Mass	Sequence	Sources	charge	xCorr	3	5	0	1
				1	92	1104.58	IGFPWSEIR	B	2	2.465
				2	94	1182.59	APDFVFYAPR	A,B	2	4.0796
				3	88	2082	FYPEDVSEELIQDITQR	A,B	3	4.0823
				4	89	1660.8	EVWFFGLQYQDTK	B	2	4.2576
				5	94	1703.86	TQEQLALEMAELTAR	D	2	5.668
				6	99	1719.86	TQEQLALEM(+16)AELTAR	A,B,D	2	5.668
Serial#	Gi	Protein Name	Comment	# identified peptides	Sources
43	28436809	Radixin [Homo sapiens]		4	B,A
	74214200	unnamed protein product [Mus musculus]
	74224118	unnamed protein product [Mus musculus]
	81673083	Unknown (protein for MGC:128776) [Bos taurus]
	4506467	radixin [Homo sapiens]
	56799432	radixin [Rattus norvegicus]
	74189566	unnamed protein product [Mus musculus]
	6677699	radixin [Mus musculus]
	40804379	radixin [Rattus norvegicus]			> Score >	Mass	Sequence	Sources	charge	xCorr	3	4	0	0
				1	92	1104.58	IGFPWSEIR	B	2	2.465
				2	94	1182.59	APDFVFYAPR	A,B	2	4.0796
				3	95	1414.77	QLQALSSELAQAR	B	2	4.1775
				4	76	1414.77	QLQALSSELAQAR	A	2	4.1775
				5	99	1662.83	NQEQLAAELAEFTAK	A,B	2	5.8538
Serial#	Gi	Protein Name	Comment	# identified peptides	Sources
44	17902245	EZRIN [Rattus norvegicus]		3	B,A
	11276938	hypothetical protein DKFZp762H157.1 - human (fragment)
	12832989	unnamed protein product [Mus musculus]
	74215414	unnamed protein product [Mus musculus]
	74216983	unnamed protein product [Mus musculus]
	74179741	unnamed protein product [Mus musculus]
	22770984	ezrin [Oryctolagus cuniculus]
	52138521	ezrin [Rattus norvegicus]
	40804381	ezrin [Rattus norvegicus]
	119717	Ezrin (p81) (Cytovillin) (Villin-2)
	83921618	villin 2 [Mus musculus]
	26330558	unnamed protein product [Mus musculus]
	50881	ezrin [Mus musculus]
	15530243	Villin 2 [Homo sapiens]
	46249758	Villin 2 [Homo sapiens]			> Score >	Mass	Sequence	Sources	charge	xCorr	2	3	0	0
				1	92	1104.58	IGFPWSEIR	B	2	2.465
				2	94	1182.59	APDFVFYAPR	A,B	2	4.0796
				3	97	1651.82	SQEQLAAELAEYTAK	A,B	2	5.3315
Serial#	Gi	Protein Name	Comment	# identified peptides	Sources
45	30354619	YWHAZ protein [Homo sapiens]		4	D,C,B,A
	68085578	Tyrosine 3/tryptophan 5 -monooxygenase activation protein, zeta polypeptide [Homo sapiens]
	49119653	YWHAZ protein [Homo sapiens]
	80477445	Tyrosine 3/tryptophan 5 -monooxygenase activation protein, zeta polypeptide [Homo sapiens]			> Score >	Mass	Sequence	Sources	charge	xCorr	3	3	1	2
				1	89	1205.66	DSTLIM(+16)QLLR	D	2	2.9727
				2	91 89	1304.68	FLIPNASQAESK	A,B,C,D	2	2.5585
				3	94	1418.7	DIC(+57)NDVLSLLEK	A,B	2	3.63
				4	72	2169.08	GIVDQSQQAYQEAFEISKK	B	3	2.1916
				5	82	2169.08	GIVDQSQQAYQEAFEISKK	A	3	2.1916
Serial#	Gi	Protein Name	Comment	# identified peptides	Sources
46	13928824	tyrosine 3-monooxygenase/tryptophan 5-monooxygenase activation protein [Rattus norvegicus]		3	D,B,A
	55644755	PREDICTED: similar to epsilon isoform of 14-3-3 protein [Pan troglodytes]
	31981925	tyrosine 3-monooxygenase/tryptophan 5-monooxygenase activation protein, epsilon polypeptide [Mus mus ...
	62131678	14-3-3 protein epsilon isoform transcript variant 1 [Homo sapiens]			> Score >	Mass	Sequence	Sources	charge	xCorr	2	1	0	1
				1	89	1205.66	DSTLIM(+16)QLLR	D	2	2.9727
				2	80	1835.94	AASDIAM(+16)TELPPTHPIR	A	3	1.8313
				3	91	1463.71	VAGM(+16)DVELTVEER	A	2	4.2479
				4	94	1463.71	VAGM(+16)DVELTVEER	A,B	2	4.2479
Serial#	Gi	Protein Name	Comment	# identified peptides	Sources
47	9507245	tyrosine 3-monooxgenase/tryptophan 5-monooxgenase activation protein, gamma polypeptide [Rattus norv ...		2	D,A
	74215924	unnamed protein product [Mus musculus]
	27807401	tyrosine 3-monooxygenase/tryptophan 5-monooxygenase activation protein, gamma polypeptide [Bos tauru ...
	3065929	14-3-3 protein gamma [Mus musculus]
	5726310	14-3-3 gamma protein [Homo sapiens]			> Score >	Mass	Sequence	Sources	charge	xCorr	1	0	0	2
				1	89	1205.66	DSTLIM(+16)QLLR	D	2	2.9727
				2	90	1643.79	NVTELNEPLSNEER	A	2	4.2944
				3	72	1643.79	NVTELNEPLSNEER	D	2	4.2944
Serial#	Gi	Protein Name	Comment	# identified peptides	Sources
48	1335076	alpha-2-globin [Homo sapiens]		6	D,C,B
					> Score >	Mass	Sequence	Sources	charge	xCorr	0	4	6	5
				1	95 95	1529.73	VGAHAGEYGAEALER	C,D	2	5.0218
				2	80 80	1529.73	VGAHAGEYGAEALER	C	2	5.0218
				3	75 74	1529.73	VGAHAGEYGAEALER	B	2	5.0218
				4	82 82	1529.73	VGAHAGEYGAEALER	C	2	5.0218
				5	94	1071.55	MFLSFPTTK	B,C,D	2	2.9983
				6	83 77	1171.67	VLSPADKTNVK	D
				7	95	1171.67	VLSPADKTNVK	C
				8	79	1833.89	TYFPHFDLSHGSAQVK	B,C,D	2	5.0841
				9	95 95	1252.71	FLASVSTVLTSK	B,C,D	2	3.4903
				10	72	729.414	VLSPADK	C
				11	98	1529.73	VGAHAGEYGAEALER	B,C,D	2	5.0218
				12	84	1529.73	VGAHAGEYGAEALER	C	2	5.0218
				13	96	1833.89	TYFPHFDLSHGSAQVK	C,D	2	5.0841
				14	82	1071.55	MFLSFPTTK	C	2	2.9983
Serial#	Gi	Protein Name	Comment	# identified peptides	Sources
49	80478451	Tubulin, alpha 2 [Mus musculus]		8	D,C,B,A
	74186501	unnamed protein product [Mus musculus]
	74198980	unnamed protein product [Mus musculus]
	74181454	unnamed protein product [Mus musculus]
	76618145	PREDICTED: similar to Tubulin alpha-2 chain (Alpha-tubulin 2) isoform 8 [Bos taurus]
	76618147	PREDICTED: similar to Tubulin alpha-2 chain (Alpha-tubulin 2) isoform 9 [Bos taurus]
	76618151	PREDICTED: similar to Tubulin alpha-2 chain (Alpha-tubulin 2) isoform 11 [Bos taurus]
	76618159	PREDICTED: similar to Tubulin alpha-2 chain (Alpha-tubulin 2) isoform 14 [Bos taurus]
	76618161	PREDICTED: similar to Tubulin alpha-2 chain (Alpha-tubulin 2) isoform 15 [Bos taurus]
	76618168	PREDICTED: similar to tubulin, alpha 2 isoform 2 isoform 18 [Bos taurus]
	62653035	PREDICTED: similar to Tubulin alpha-2 chain (Alpha-tubulin 2) [Rattus norvegicus]
	18204869	K-ALPHA-1 protein [Homo sapiens]			> Score >	Mass	Sequence	Sources	charge	xCorr	6	7	6	4
				1	86	1015.58	DVNAAIATIK	B	2	3.3489
				2	96	1015.58	DVNAAIATIK	A,B,C,D	2	3.3489
				3	99	1487.88	LISQIVSSITASLR	A,B,C	2	4.7633
				4	97	1584.73	SIQFVDWC(+57)PTGFK	A,B,C,D	2	4.7739
				5	96	1701.91	AVFVDLEPTVIDEVR	A,B,C,D	2	5.1107
				6	92	1756.96	IHFPLATYAPVISAEK	A,B	2	4.6214
				7	80 72	1824.99	VGINYQPPTVVPGGDLAK	A,B,C,D	2	4.2945
				8	83	2750.27	AYHEQLSVAEITNAC(+57)FEPANQMVK	B	3	3.7104
				9	72	2766.27	AYHEQLSVAEITNAC(+57)FEPANQM(+16)VK	B	3	3.7104
				10	71	1880.88	AVC(+57)M(+16)LSNTTAIAEAWAR	C	2	3.7862
Serial#	Gi	Protein Name	Comment	# identified peptides	Sources
50	56676330	HP1-BP74 [Homo sapiens]		8	D,B,A
					> Score >	Mass	Sequence	Sources	charge	xCorr	5	8	0	1
				1	74	938.494	EASYSLIR	B	2	1.7138
				2	86 84	1006.52	YPSLELER	A,B	2	2.6086
				3	89	1104.6	MDAILTEAIK	B	2	3.6996
				4	93	1120.6	M(+16)DAILTEAIK	A,B	2	3.6996
				5	88 78	1156.59	SSAVDPEPQVK	B	2	1.992
				6	95	1273.71	LEDVLPLAFTR	B	2	3.7124
				7	92	1558.93	ALPLIVGAQLIHADK	A,B	2	4.9063
				8	93	1601.87	TIPSWATLSASQLAR	A,B	2	4.6203
				9	73	4442.98	LAEGEEEKPEPDISSEESVSTVEEQENETPPATSSEAEQPK	A,B,D	3	5.1467
Serial#	Gi	Protein Name	Comment	# identified peptides	Sources
51	62990189	heterogeneous nuclear ribonucleoprotein R [Rattus norvegicus]		7	D,B,A
	74194838	unnamed protein product [Mus musculus]
	74219109	unnamed protein product [Mus musculus]
	74228775	unnamed protein product [Mus musculus]			> Score >	Mass	Sequence	Sources	charge	xCorr	6	4	0	2
				1	86	927.505	AGPIWDLR	A,B	2	2.9845
				2	71	1440.75	MPPPM(+16)RGRGRGGR	D
				3	71	1108.55	ENILEEFSK	A,D	2	2.6204
				4	86	1758.78	STAYEDYYYHPPPR	A,B	3	3.4481
				5	70	1311.65	TGYTLDVTTGQR	A	2	3.3046
				6	79	1311.65	TGYTLDVTTGQR	B	2	3.3046
				7	94	1311.65	TGYTLDVTTGQR	A,B	2	3.3046
				8	94 84	1460.79	NLATTVTEEILEK	A,B	2	4.9234
				9	95	1738.87	EFNEEGALSVLQQFK	A	2	3.8599
Serial#	Gi	Protein Name	Comment	# identified peptides	Sources
52	13937981	Peptidylprolyl isomerase A, isoform 1 [Homo sapiens]		6	D,C,B
	89058333	PREDICTED: similar to peptidylprolyl isomerase A isoform 1 [Homo sapiens]
	51895760	peptidylprolyl isomerase A (cyclophilin A) [Homo sapiens]			> Score >	Mass	Sequence	Sources	charge	xCorr	0	6	4	4
				1	86 80	1505.74	VKEGMNIVEAMER	B	3	3.1271
				2	92	1055.54	VSFELFADK	B,C,D	2	3.695
				3	95 95	1154.57	FEDENFILK	B,C,D	2	3.8893
				4	91	1247.61	KITIADC(+57)GQLE	B	2	3.1219
				5	93	1278.58	EGMNIVEAMER	B,C,D	2	3.6129
				6	87	1294.58	EGM(+16)NIVEAMER	B,D	2	3.6129
				7	86	1294.58	EGMNIVEAM(+16)ER	B	2	3.6129
				8	92 92	1379.76	VSFELFADKVPK	B,C,D	2	3.9232
Serial#	Gi	Protein Name	Comment	# identified peptides	Sources
53	66932947	alpha-2-macroglobulin precursor [Homo sapiens]		7	C
	51476396	hypothetical protein [Homo sapiens]
	46812315	alpha 2 macroglobulin [Homo sapiens]
	25303946	Alpha-2-macroglobulin, precursor [Homo sapiens]
	62088808	Alpha 2 macroglobulin variant [Homo sapiens]			> Score >	Mass	Sequence	Sources	charge	xCorr	0	0	7	0
				1	88	1103.61	SSGSLLNNAIK	C	2	3.0114
				2	85	1672.86	TEHPFTVEEFVLPK	C	3	3.8386
				3	84	1134.58	SASNMAIVDVK	C	2	2.7116
				4	92	1255.64	AIGYLNTGYQR	C	2	3.3811
				5	95	1394.68	NEDSLVFVQTDK	C	2	3.7181
				6	91	2387.2	QQNAQGGFSSTQDTVVALHALSK	C	3	4.5678
				7	86	1848.88	QFSFPLSSEPFQGSYK	C	2	2.8106
Serial#	Gi	Protein Name	Comment	# identified peptides	Sources
54	12653227	Interleukin enhancer binding factor 2 [Homo sapiens]		7	D,C,B,A
	74183311	unnamed protein product [Mus musculus]
	83405442	Unknown (protein for MGC:134524) [Bos taurus]
	62898213	interleukin enhancer binding factor 2 variant [Homo sapiens]			> Score >	Mass	Sequence	Sources	charge	xCorr	6	4	1	5
				1	97	1041.64	VLQSALAAIR	A,B,C,D	2	3.9877
				2	88	1144.65	QPLALNVAYR	A,B	2	2.2333
				3	89	1731.92	VKPAPDETSFSEALLK	A,B,D	2	3.1191
				4	86	1236.77	ILITTVPPNLR	A	2	2.2457
				5	94	1409.84	ILPTLEAVAALGNK	A,B,D	2	4.1904
				6	86	1425.66	WFEENASQSTVK	A,D	2	4.3258
				7	87	1731.92	VKPAPDETSFSEALLK	A,B	2	3.1191
				8	84	2870.36	AQDPSEVLTMLTNETGFEISSSDATVK	D	2	4.0485
Serial#	Gi	Protein Name	Comment	# identified peptides	Sources
55	55637711	PREDICTED: glyceraldehyde-3-phosphate dehydrogenase [Pan troglodytes]		7	D,C,B,A
	31645	glyceraldehyde-3-phosphate dehydrogenase [Homo sapiens]			> Score >	Mass	Sequence	Sources	charge	xCorr	6	7	3	6
				1	84	1411.79	GALQNIIPASTGAAK	A,B,C,D	2	3.9868
				2	79 74	2213.11	VIISAPSADAPMFVMGVNHEK	B	3	1.9838
				3	96	1530.77	VPTANVSVVDLTC(+57)R	A,B,D	2	4.1801
				4	88	2385.21	RVIISAPSADAPMFVM(+16)GVNHEK	A,B,D	3	4.9315
				5	77	2401.21	RVIISAPSADAPM(+16)FVM(+16)GVNHEK	A	3	4.9315
				6	93 92	1613.9	LVINGNPITIFQER	A,B,C,D	2	4.3054
				7	97 89	1763.8	LISWYDNEFGYSNR	A,B,C,D	2	4.7801
				8	97	1833.88	IISNASC(+57)TTNC(+57)LAPLAK	A,B,D	2	4.7293
Serial#	Gi	Protein Name	Comment	# identified peptides	Sources
56	14249959	HNRPC protein [Homo sapiens]		6	D,B,A
	13937888	HNRPC protein [Homo sapiens]
	14250048	HNRPC protein [Homo sapiens]
	14110428	heterogeneous nuclear ribonucleoprotein C isoform a [Homo sapiens]
	4758544	heterogeneous nuclear ribonucleoprotein C isoform b [Homo sapiens]
	62088634	Heterogeneous nuclear ribonucleoproteins C1/C2 variant [Homo sapiens]
	58476967	HNRPC protein [Homo sapiens]
	80476704	HNRPC protein [Homo sapiens]			> Score >	Mass	Sequence	Sources	charge	xCorr	6	6	0	3
				1	94	1123.6	KSDVEAIFSK	A,B	2	3.2947
				2	94	1159.62	VDSLLENLEK	A,B	2	3.8079
				3	99	1316.79	VFIGNLNTLVVK	A,B	2	3.7082
				4	94	1329.66	GFAFVQYVNER	A,B,D	2	4.1849
				5	84	1415.77	QKVDSLLENLEK	A,B,D	2	3.1302
				6	97	1682.91	MIAGQVLDINLAAEPK	A	2	5.462
				7	95	1698.91	M(+16)IAGQVLDINLAAEPK	A,B,D	2	5.462
Serial#	Gi	Protein Name	Comment	# identified peptides	Sources
57	17402875	alpha 2 type VI collagen isoform 2C2 precursor [Homo sapiens]		6	D,C,B,A
	13603394	type VI collagen alpha 2 chain precursor [Homo sapiens]
	41350923	Alpha 2 type VI collagen, isoform 2C2 precursor [Homo sapiens]			> Score >	Mass	Sequence	Sources	charge	xCorr	4	3	2	2
				1	82 73	1021.54	NLQGISSFR	C	2	2.6097
				2	93	1074.61	NFVINVVNR	A	2	3.1786
				3	90 81	1214.69	LFAVAPNQNLK	A,B,D	2	3.1803
				4	94 85	1301.65	DIASTPHELYR	A,D	2	3.1244
				5	96	1530.69	DYDSLAQPGFFDR	A,B,C	2	3.1762
				6	90	1743.91	NLEWIAGGTWTPSALK	B	2	4.539
Serial#	Gi	Protein Name	Comment	# identified peptides	Sources
58	77702086	heat shock protein 60 [Homo sapiens]		6	C,B,A
	49522865	Chaperonin [Homo sapiens]			> Score >	Mass	Sequence	Sources	charge	xCorr	2	4	1	0
				1	88	1215.66	NAGVEGSLIVEK	B	2	2.9279
				2	88	1919.07	ISSIQSIVPALEIANAHR	A	3	3.785
				3	90	1919.07	ISSIQSIVPALEIANAHR	B	3	3.785
				4	87	2129.14	ALMLQGVDLLADAVAVTM(+16)GPK	B	3	4.1286
				5	83	1520.76	TLNDELEIIEGM(+16)K	B	2	4.0656
				6	87	2868.58	TALLDAAGVASLLTTAEVVVTEIPKEEK	C	3	4.2703
				7	89	2560.25	LVQDVANNTNEEAGDGTTTATVLAR	A	2	5.4676
Serial#	Gi	Protein Name	Comment	# identified peptides	Sources
59	3282771	actin-binding protein homolog ABP-278 [Homo sapiens]		6	D,B,A
	4503747	filamin B, beta (actin binding protein 278) [Homo sapiens]
	53791217	filamin B [Homo sapiens]
	51491176	hypothetical protein [Homo sapiens]
	34365016	hypothetical protein [Homo sapiens]			> Score >	Mass	Sequence	Sources	charge	xCorr	5	1	0	1
				1	81	1210.63	VLQSFTVDSSK	A	2	2.1251
				2	82	1250.63	TGEEVGFVVDAK	A	2	3.001
				3	73	1501.83	SPFTVGVAAPLDLSK	B	2	3.0945
				4	82	2387.18	EATTDFTVDSRPLTQVGGDHIK	A	3	2.2619
				5	70 70	2581.26	FNDEHIPESPYLVPVIAPSDDAR	A	3	2.4118
				6	77	2547.31	VTASGPGLSSYGVPASLPVDFAIDAR	A,D	2	3.6392
Serial#	Gi	Protein Name	Comment	# identified peptides	Sources
60	86827651	EEF1A1 protein [Bos taurus]		6	D,C,B,A
	26345590	unnamed protein product [Mus musculus]
	74204203	unnamed protein product [Mus musculus]
	74195737	unnamed protein product [Mus musculus]
	31092	unnamed protein product [Homo sapiens]
	51873060	eukaryotic translation elongation factor 1 alpha 1 [Mus musculus]
	13278382	Eukaryotic translation elongation factor 1 alpha 1 [Mus musculus]
	23468343	Eukaryotic translation elongation factor 1 alpha 1 [Homo sapiens]
	80478711	Eukaryotic translation elongation factor 1 alpha 1 [Mus musculus]
	15805031	eukaryotic translation elongation factor 1 alpha 2 [Rattus norvegicus]
	48734733	Eukaryotic translation elongation factor 1 alpha 1 [Homo sapiens]
	48734966	Eukaryotic translation elongation factor 1 alpha 1 [Homo sapiens]
	62896589	eukaryotic translation elongation factor 1 alpha 1 variant [Homo sapiens]
	62896605	eukaryotic translation elongation factor 1 alpha 1 variant [Homo sapiens]
	62896661	eukaryotic translation elongation factor 1 alpha 1 variant [Homo sapiens]
	62897525	eukaryotic translation elongation factor 1 alpha 1 variant [Homo sapiens]
	62897653	eukaryotic translation elongation factor 1 alpha 1 variant [Homo sapiens]
	55665593	eukaryotic translation elongation factor 1 alpha-like 3 [Homo sapiens]			> Score >	Mass	Sequence	Sources	charge	xCorr	6	5	3	4
				1	90	1404.73	YYVTIIDAPGHR	A,B	2	3.3681
				2	92	975.551	LPLQDVYK	A,B,C,D	2	2.5781
				3	93	1025.61	IGGIGTVPVGR	A,B,C,D	2	4.1425
				4	95	1120.6	STTTGHLIYK	A,D	2	2.1581
				5	84	1314.74	EHALLAYTLGVK	D	2	3.0548
				6	97	1314.74	EHALLAYTLGVK	A,B	2	3.0548
				7	94	1404.73	YYVTIIDAPGHR	A,B	2	3.3681
				8	90	2531.38	VETGVLKPGM(+16)VVTFAPVNVTTEVK	A,B,C	3	5.902
Serial#	Gi	Protein Name	Comment	# identified peptides	Sources
61	12804929	Mitochondrial malate dehydrogenase, precursor [Homo sapiens]		5	C,B,A
	49168580	MDH2 [Homo sapiens]
	21735621	mitochondrial malate dehydrogenase precursor [Homo sapiens]
	41472053	unknown [Homo sapiens]			> Score >	Mass	Sequence	Sources	charge	xCorr	3	2	1	0
				1	82 76	1132.6	M(+16)ISDAIPELK	C	2	2.5367
				2	92	1233.72	IFGVTTLDIVR	A	2	2.8239
				3	96 92	1560.8	VDFPQDQLTALTGR	A,B	2	3.9987
				4	90	2365.24	LTLYDIAHTPGVAADLSHIETK	B	3	5.3964
				5	94	1793.09	VAVLGASGGIGQPLSLLLK	A	2	5.7442
Serial#	Gi	Protein Name	Comment	# identified peptides	Sources
62	1208427	ER-60 protease [Homo sapiens]		5	B,A
	21361657	protein disulfide isomerase-associated 3 precursor [Homo sapiens]
	860986	protein disulfide isomerase [Homo sapiens]
	303618	phospholipase C-alpha [Homo sapiens]
	2245365	ER-60 protein [Homo sapiens]			> Score >	Mass	Sequence	Sources	charge	xCorr	3	3	0	0
				1	83	1341.68	GFPTIYFSPANK	B	2	2.6773
				2	88 88	1370.69	ELSDFISYLQR	A,B	2	3.3388
				3	76	2348.07	DASIVGFFDDSFSEAHSEFLK	A	3	2.0344
				4	84	1680.76	M(+16)DATANDVPSPYEVR	B	2	3.7723
				5	94	1832.9	VVVAENFDEIVNNENK	A	2	4.4985
Serial#	Gi	Protein Name	Comment	# identified peptides	Sources
63	20380766	CA1 protein [Homo sapiens]		6	D,C,B
					> Score >	Mass	Sequence	Sources	charge	xCorr	0	5	6	6
				1	93 87	970.593	VLDALQAIK	B,C,D	2	3.3904
				2	91 81	1186.69	ADGLAVIGVLMK	C,D	2	4.3234
				3	89	1186.69	ADGLAVIGVLMK	B	2	4.3234
				4	86 76	1186.69	ADGLAVIGVLMK	D	2	4.3234
				5	96	1202.69	ADGLAVIGVLM(+16)K	C,D	2	4.3234
				6	98	1929.01	HDTSLKPISVSYNPATAK	B,C,D	3	4.4871
				7	83	1580.79	ESISVSSEQLAQFR	D	2	3.8023
				8	92	1580.79	ESISVSSEQLAQFR	C,D	2	3.8023
				9	86	1580.79	ESISVSSEQLAQFR	B	2	3.8023
				10	78	1742.91	LYPIANGNNQSPVDIK	B,C,D	2	4.8833
				11	73	2759.39	SLLSNVEGDNAVPMQHNNRPTQPLK	C,D	3	2.8738
				12	71	2775.39	SLLSNVEGDNAVPM(+16)QHNNRPTQPLK	C,D	3	2.8738
Serial#	Gi	Protein Name	Comment	# identified peptides	Sources
64	71773415	annexin VI isoform 2 [Homo sapiens]		6	D,C,B,A
	71773329	annexin VI isoform 1 [Homo sapiens]
	35218	unnamed protein product [Homo sapiens]			> Score >	Mass	Sequence	Sources	charge	xCorr	3	5	2	2
				1	93	1130.64	EAILDIITSR	B	2	3.1642
				2	70	1717.84	SLHQAIEGDTSGDFLK	A	3	3.0073
				3	92 86	1621.74	SLEDALSSDTSGHFR	B	2	3.7308
				4	87	2524.14	GSIHDFPGFDPNQDAEALYTAMK	B	3	3.2808
				5	77	2540.14	GSIHDFPGFDPNQDAEALYTAM(+16)K	B	3	3.2808
				6	99	1745.83	DLEADIIGDTSGHFQK	A,B,C,D	2	5.7088
				7	97	2865.32	EEDDVVSEDLVQQDVQDLYEAGELK	A,B,C,D	2	5.7541
Serial#	Gi	Protein Name	Comment	# identified peptides	Sources
65	4176418	IgG kappa chain [Homo sapiens]		5	D,C,B,A
					> Score >	Mass	Sequence	Sources	charge	xCorr	4	1	4	2
				1	85	1875.91	VYAC(+57)EVTHQGLSSPVTK	A	3	3.2741
				2	92	1502.76	DSTYSLSSTLTLSK	A,C,D	2	3.5561
				3	99	1797.87	SGTASVVC(+57)LLNNFYPR	A	2	5.2652
				4	80	1875.91	VYAC(+57)EVTHQGLSSPVTK	C	3	3.2741
				5	95 90	1895.87	DIEM(+16)TQSPSSLSASVGDR	C	2	5.211
				6	74	1946.03	TVAAPSVFIFPPSDEQLK	A,B,C,D	2	3.906
Serial#	Gi	Protein Name	Comment	# identified peptides	Sources
66	459813	haptoglobin alpha(2FS)-beta precursor [Homo sapiens]		5	C,B
	1212947	haptoglobin [Homo sapiens]			> Score >	Mass	Sequence	Sources	charge	xCorr	0	1	5	0
				1	78 75	920.463	GSFPWQAK	C
				2	99	1203.64	VTSIQDWVQK	B,C	2	3.5445
				3	92	1290.73	DIAPTLTLYVGK	C	2	3.3803
				4	83	1311.61	TEGDGVYTLNDK	C	2	3.0688
				5	76	3874.65	YQEDTC(+57)YGDAGSAFAVHDLEEDTWYATGILSFDK	C	3	2.7232
Serial#	Gi	Protein Name	Comment	# identified peptides	Sources
67	4960030	Rab GDP dissociation inhibitor beta [Homo sapiens]		5	B,A
	285975	human rab GDI [Homo sapiens]
	13477339	GDP dissociation inhibitor 2 [Homo sapiens]			> Score >	Mass	Sequence	Sources	charge	xCorr	2	5	0	0
				1	90 86	1141.6	M(+16)LLYTEVTR	B	2	2.8796
				2	90	1324.74	YIAIVSTTVETK	B	2	2.9909
				3	92 82	1365.7	DLGTESQIFISR	B	2	3.8328
				4	90 81	1365.7	DLGTESQIFISR	A	2	3.8328
				5	99	1902.8	TDDYLDQPC(+57)YETINR	A,B	2	4.7948
				6	77	2141.11	SPYLYPLYGLGELPQGFAR	B	2	1.7804
Serial#	Gi	Protein Name	Comment	# identified peptides	Sources
68	4758304	protein disulfide isomerase-associated 4 [Homo sapiens]		5	B,A
					> Score >	Mass	Sequence	Sources	charge	xCorr	3	3	0	0
				1	93 93	1126.58	FDVSGYPTIK	A	2	3.0256
				2	93 93	1126.58	FDVSGYPTLK	A	2	3.0256
				3	87	1168.56	TFDSIVM(+16)DPK	B	2	2.6166
				4	86	1702.73	FAM(+16)EPEEFDSDTLR	B	2	2.8124
				5	80	1799.86	YGIVDYM(+16)IEQSGPPSK	B	2	4.1051
				6	92	1799.86	YGIVDYM(+16)IEQSGPPSK	A	2	4.1051
Serial#	Gi	Protein Name	Comment	# identified peptides	Sources
69	7949053	heterogeneous nuclear ribonucleoprotein A2/B1 isoform 1 [Mus musculus]		5	D,B,A
	76662749	PREDICTED: similar to Heterogeneous nuclear ribonucleoproteins A2/B1 (hnRNP A2 / hnRNP B1) isoform 7 ...
	76662751	PREDICTED: similar to heterogeneous nuclear ribonucleoprotein A2/B1 isoform 2 isoform 8 [Bos taurus]
	76662753	PREDICTED: similar to heterogeneous nuclear ribonucleoprotein A2/B1 isoform 2 isoform 2 [Bos taurus]
	76662755	PREDICTED: similar to heterogeneous nuclear ribonucleoprotein A2/B1 isoform 2 isoform 9 [Bos taurus]
	76662769	PREDICTED: similar to heterogeneous nuclear ribonucleoprotein A2/B1 isoform 2 isoform 16 [Bos taurus ...
	76662773	PREDICTED: similar to heterogeneous nuclear ribonucleoprotein A2/B1 isoform 2 isoform 18 [Bos taurus ...
	76662777	PREDICTED: similar to heterogeneous nuclear ribonucleoprotein A2/B1 isoform 2 isoform 20 [Bos taurus ...
	76662783	PREDICTED: similar to heterogeneous nuclear ribonucleoprotein A2/B1 isoform 2 isoform 22 [Bos taurus ...
	76662781	PREDICTED: similar to Heterogeneous nuclear ribonucleoproteins A2/B1 (hnRNP A2 / hnRNP B1) isoform 2 ...
	32880197	heterogeneous nuclear ribonucleoprotein A2/B1 isoform 2 [Mus musculus]
	21071091	heterogeneous nuclear ribonucleoprotein A2/B1 [Mus musculus]
	23266713	heterogeneous nuclear ribonucleoprotein A2/B1/B0 [Mus musculus]			> Score >	Mass	Sequence	Sources	charge	xCorr	3	5	0	1
				1	92	1188.65	IDTIEIITDR	A,B,D	2	3.2855
				2	85 85	1879.97	LFVGGIKEDTEEHHLR	B	3	2.2669
				3	92 83	1377.63	GGGGNFGPGPGSNFR	B	2	2.9354
				4	88 88	2277.16	GFGFVTFDDHDPVDKIVLQK	A,B	3	3.3238
				5	96	1798.92	LFIGGLSFETTEESLR	A,B	2	5.0008
Serial#	Gi	Protein Name	Comment	# identified peptides	Sources
70	30030	alpha-1 collagen VI (AA 574-1009) [Homo sapiens]		5	D,C,B,A
	18490111	Unknown (protein for IMAGE:4178997) [Homo sapiens]
	87196339	collagen, type VI, alpha 1 precursor [Homo sapiens]
	38197044	COL6A1 protein [Homo sapiens]			> Score >	Mass	Sequence	Sources	charge	xCorr	4	4	2	1
				1	89	957.573	IALVITDGR	A	2	2.9052
				2	83	1046.6	VPSYQALLR	B	2	2.806
				3	94	1757.81	TAEYDVAYGESHLFR	A,B,C	2	3.7206
				4	97	1554.77	ENYAELLEDAFLK	A,B	2	3.5775
				5	78	1757.81	TAEYDVAYGESHLFR	A	2	3.7206
				6	99	1932.01	LLLFSDGNSQGATPAAIEK	A,B,C,D	2	6.1236
Serial#	Gi	Protein Name	Comment	# identified peptides	Sources
71	31417921	TKT protein [Homo sapiens]		5	D,C,B,A
	14250367	Similar to transketolase (Wernicke-Korsakoff syndrome) [Homo sapiens]
	38013966	TKT protein [Homo sapiens]
	4507521	transketolase [Homo sapiens]
	62898960	transketolase variant [Homo sapiens]
	37267	transketolase [Homo sapiens]			> Score >	Mass	Sequence	Sources	charge	xCorr	4	4	1	2
				1	79 75	922.471	MPSLPSYK	A	2	1.4642
				2	95	2023.02	NMAEQIIQEIYSQIQSK	B	3	4.7047
				3	91	2039.02	NM(+16)AEQIIQEIYSQIQSK	A	3	4.7047
				4	71	2508.21	TSRPENAIIYNNNEDFQVGQAK	B	3	4.8394
				5	84	2508.21	TSRPENAIIYNNNEDFQVGQAK	D	3	4.8394
				6	83	2508.21	TSRPENAIIYNNNEDFQVGQAK	D	3	4.8394
				7	87	2508.21	TSRPENAIIYNNNEDFQVGQAK	A	3	4.8394
				8	70	2508.21	TSRPENAIIYNNNEDFQVGQAK	A	3	4.8394
				9	85	2649.45	SKDDQVTVIGAGVTLHEALAAAELLK	B	3	5.057
				10	90	1884.92	SVPTSTVFYPSDGVATEK	A,B,C,D	2	3.8756
Serial#	Gi	Protein Name	Comment	# identified peptides	Sources
72	1708182	Hemopexin precursor (Beta-1B-glycoprotein)		5	D,C,B,A
	1335098	unnamed protein product [Homo sapiens]			> Score >	Mass	Sequence	Sources	charge	xCorr	4	3	3	4
				1	76 70	1141.59	GGYTLVSGYPK	A,B	2	3.7114
				2	96	1141.59	GGYTLVSGYPK	A,C,D	2	3.7114
				3	93	1141.59	GGYTLVSGYPK	A	2	3.7114
				4	81	1142.45	DYFMPC(+57)PGR	A	2	1.9821
				5	89 89	1220.61	NFPSPVDAAFR	A,C,D	2	2.2372
				6	71	2364.14	LLQDEFPGIPSPLDAAVEC(+57)HR	A,B,C,D	3	3.6225
				7	77	2498.21	EVGTPHGIILDSVDAAFIC(+57)PGSSR	B,D
Serial#	Gi	Protein Name	Comment	# identified peptides	Sources
73	39645240	HNRPU protein [Homo sapiens]		5	D,C,B,A
	74136883	heterogeneous nuclear ribonucleoprotein U isoform a [Homo sapiens]
	32358	hnRNP U protein [Homo sapiens]
	13177673	Heterogeneous nuclear ribonucleoprotein U, isoform b [Homo sapiens]
	6226894	Heterogenous nuclear ribonucleoprotein U (hnRNP U) (Scaffold attachment factor A) (SAF-A) (p120) (pp ...
	55859528	heterogeneous nuclear ribonucleoprotein U (scaffold attachment factor A) [Homo sapiens]
	16041796	HNRPU protein [Homo sapiens]			> Score >	Mass	Sequence	Sources	charge	xCorr	3	4	3	4
				1	80 79	1021.57	DLPEHAVLK	D	2	1.8334
				2	76	1382.7	YNILGTNTIMDK	B	2	4.1181
				3	88	1398.7	YNILGTNTIM(+16)DK	B	2	4.1181
				4	95	1647.85	NFILDQTNVSAAAQR	A,B,C,D	2	5.229
				5	77	1714.91	SSGPTSLFAVTVAPPGAR	A,B,C,D	2	3.0125
				6	95	2724.36	EKPYFPIPEEYTFIQNVPLEDR	A,B,C,D	3	5.4966
Serial#	Gi	Protein Name	Comment	# identified peptides	Sources
74	5174539	cytosolic malate dehydrogenase [Homo sapiens]		5	D,C,B,A
					> Score >	Mass	Sequence	Sources	charge	xCorr	3	5	2	2
				1	80	1393.71	FVEGLPINDFSR	A,B,C,D	2	3.2467
				2	71	1450.74	DVIATDKEDVAFK	C	2	3.668
				3	82	1450.74	DVIATDKEDVAFK	B	2	3.668
				4	89	2280.12	NVIIWGNHSSTQYPDVNHAK	B,D	3	3.6619
				5	93	1757.9	VIVVGNPANTNC(+57)LTASK	A,B	2	4.6118
				6	93	1816.85	ELTEEKESAFEFLSSA	B	2	3.835
				7	95	1816.85	ELTEEKESAFEFLSSA	A	2	3.835
Serial#	Gi	Protein Name	Comment	# identified peptides	Sources
75	55956788	nucleolin [Homo sapiens]		5	D,B,A
	21750187	unnamed protein product [Homo sapiens]
	34534595	unnamed protein product [Homo sapiens]			> Score >	Mass	Sequence	Sources	charge	xCorr	4	4	0	1
				1	75	937.499	TGISDVFAK	A,D	2	2.4383
				2	86 85	1000.54	NDLAVVDVR	A,B	2	2.6453
				3	91 85	1160.58	SISLYYTGEK	B	2	2.2782
				4	88	1178.57	EVFEDAAEIR	A,B	2	2.6297
				5	87	1178.57	EVFEDAAEIR	B	2	2.6297
				6	75	1178.57	EVFEDAAEIR	A	2	2.6297
				7	95	1648.74	FGYVDFESAEDLEK	A,B	2	4.4571
Serial#	Gi	Protein Name	Comment	# identified peptides	Sources
76	49522232	Ribosomal protein L7a [Homo sapiens]		4	D,B,A
	62647332	PREDICTED: similar to 60S ribosomal protein L7a [Rattus norvegicus]
	94378536	PREDICTED: similar to 60S ribosomal protein L7a [Mus musculus]
	94381073	PREDICTED: similar to 60S ribosomal protein L7a (Surfeit locus protein 3) [Mus musculus]
	94386296	PREDICTED: similar to 60S ribosomal protein L7a (Surfeit locus protein 3) [Mus musculus]
	94387458	PREDICTED: similar to 60S ribosomal protein L7a (Surfeit locus protein 3) [Mus musculus]
	94387462	PREDICTED: similar to 60S ribosomal protein L7a (Surfeit locus protein 3) [Mus musculus]
	94403046	PREDICTED: similar to 60S ribosomal protein L7a (Surfeit locus protein 3) [Mus musculus]
	61886865	PREDICTED: similar to 60S ribosomal protein L7a [Bos taurus]
	54261683	Ribosomal protein L7a [Mus musculus]
	62896627	ribosomal protein L7a variant [Homo sapiens]
	62642554	PREDICTED: similar to Rpl7a protein [Rattus norvegicus]
	59808713	Ribosomal protein L7a [Mus musculus]
	89047383	PREDICTED: similar to 60S ribosomal protein L7a isoform 3 [Homo sapiens]
	55958183	ribosomal protein L7a [Homo sapiens]
	30410942	Rpl7a protein [Mus musculus]
	94387502	PREDICTED: similar to 60S ribosomal protein L7a (Surfeit locus protein 3) [Mus musculus]
	82956897	PREDICTED: similar to 60S ribosomal protein L7a (Surfeit locus protein 3) isoform 3 [Mus musculus]
	94403976	PREDICTED: similar to 60S ribosomal protein L7a (Surfeit locus protein 3) [Mus musculus]
	40796182	Ribosomal protein L7a [Mus musculus]			> Score >	Mass	Sequence	Sources	charge	xCorr	4	3	0	1
				1	86	1473.83	AGVNTVTTLVENKK	A	3	1.8752
				2	90	1216.63	NFGIGQDIQPK	A,B	2	3.2471
				3	85	1345.73	AGVNTVTTLVENK	B	2	3.2872
				4	91	1345.73	AGVNTVTTLVENK	A,D	2	3.2872
				5	73	1569.84	VPPAINQFTQALDR	A,B	2	3.0061
Serial#	Gi	Protein Name	Comment	# identified peptides	Sources
77	62662783	PREDICTED: similar to 40S ribosomal protein S25 [Rattus norvegicus]		4	B,A
	94376879	PREDICTED: similar to 40S ribosomal protein S25 [Mus musculus]
	94393570	PREDICTED: similar to 40S ribosomal protein S25 [Mus musculus]			> Score >	Mass	Sequence	Sources	charge	xCorr	4	4	0	0
				1	95 87	972.573	AALQELLSK	A,B	2	3.4147
				2	94 91	1075.62	LNNLVLFDK	A,B	2	3.5767
				3	94	1084.64	LITPAVVSER	A,B	2	2.3044
				4	92	1318.74	DKLNNLVLFDK	A,B	2	3.9766
Serial#	Gi	Protein Name	Comment	# identified peptides	Sources
78	287652	H1d-Histone [Rattus norvegicus]		4	D,B,A
	74206882	unnamed protein product [Mus musculus]
	76631260	PREDICTED: similar to Histone H1.2 (H1d) [Bos taurus]
	76651042	PREDICTED: similar to Histone H1.4 (H1 VAR.2) (H1e), partial [Bos taurus]
	76651175	PREDICTED: similar to Histone H1.2 (H1d) [Bos taurus]
	2292940	Histone H1.2 [Mus musculus]
	22770675	histone H1 [Homo sapiens]
	55626046	PREDICTED: similar to Histone H1.4 (Histone H1b) [Pan troglodytes]
	558679	histone H1 [Mus musculus]
	4885375	H1 histone family, member 2 [Homo sapiens]
	66365795	H1 histone family, member 4 [Homo sapiens]			> Score >	Mass	Sequence	Sources	charge	xCorr	3	3	0	4
				1	92	1107.57	ALAAAGYDVEK	A,B,D	2	3.9698
				2	94	1198.67	ASGPPVSELITK	A,B,D	2	2.9018
				3	81	1198.67	ASGPPVSELITK	D	2	2.9018
				4	85	1198.67	ASGPPVSELITK	A	2	2.9018
				5	78	1198.67	ASGPPVSELITK	A	2	2.9018
				6	98	1326.76	KASGPPVSELITK	A,B,D	2	4.1859
				7	73	845.509	SGVSLAALK	D	1	1.6554
Serial#	Gi	Protein Name	Comment	# identified peptides	Sources
79	182440	fibrinogen gamma-prime chain [Homo sapiens]		4	D,C
	182439	fibrinogen gamma chain [Homo sapiens]
	70906439	fibrinogen, gamma chain isoform gamma-B precursor [Homo sapiens]
	70906437	fibrinogen, gamma chain isoform gamma-A precursor [Homo sapiens]			> Score >	Mass	Sequence	Sources	charge	xCorr	0	0	4	2
				1	89	1491.74	YEASILTHDSSIR	C	2	2.8598
				2	92 87	1513.73	YLQEIYNSNNQK	C	2	4.6708
				3	90 85	1513.73	YLQEIYNSNNQK	D	2	4.6708
				4	79	2536.26	AIQLTYNPDESSKPNM(+16)IDAATLK	C,D	3	2.5888
				5	93	2834.17	LTYAYFAGGDAGDAFDGFDFGDDPSDK	C	2	5.9656
Serial#	Gi	Protein Name	Comment	# identified peptides	Sources
80	4503483	eukaryotic translation elongation factor 2 [Homo sapiens]		4	D,B,A
	74353984	Unknown (protein for MGC:127305) [Bos taurus]			> Score >	Mass	Sequence	Sources	charge	xCorr	1	2	0	1
				1	87	1107.64	VFSGLVSTGLK	B	2	2.8721
				2	88	2143.08	ARPFPDGLAEDIDKGEVSAR	B	3	5.4726
				3	90	1444.77	EGIPALDNFLDKL	A	2	2.6202
				4	96	1494.78	TFC(+57)QLILDPIFK	D	2	4.133
Serial#	Gi	Protein Name	Comment	# identified peptides	Sources
81	50593093	transglutaminase 2 [Homo sapiens]		4	B,A
					> Score >	Mass	Sequence	Sources	charge	xCorr	2	3	0	0
				1	80 80	1233.64	DLYLENPEIK	B	2	2.2855
				2	89	1579.84	YLLNLNLEPFSEK	A	2	4.0872
				3	85 81	1611.81	TVEIPDPVEAGEEVK	A,B	2	3.1612
				4	71	2655.28	NYEASVDSLTFSVVTGPAPSQEAGTK	B	2	2.2269
Serial#	Gi	Protein Name	Comment	# identified peptides	Sources
82	16905456	ribonucleoprotein [Homo sapiens]		4	D,B,A
	74204715	unnamed protein product [Mus musculus]
	74177661	unnamed protein product [Mus musculus]
	16124253	M4 protein [Rattus norvegicus]
	14141154	heterogeneous nuclear ribonucleoprotein M isoform b [Homo sapiens]
	21313308	heterogeneous nuclear ribonucleoprotein M [Mus musculus]
	40796184	Hnrpm protein [Mus musculus]
	18044562	Heterogeneous nuclear ribonucleoprotein M, isoform a [Homo sapiens]
	60360010	mKIAA4193 protein [Mus musculus]
	37747452	Unknown (protein for MGC:64929) [Homo sapiens]			> Score >	Mass	Sequence	Sources	charge	xCorr	3	3	0	1
				1	85	1209.63	EVFSM(+16)AGVVVR	B	2	2.289
				2	85	1264.69	AFITNIPFDVK	A	2	1.899
				3	88	1427.71	MGPAMGPALGAGIER	B	2	3.4469
				4	87	1443.71	M(+16)GPAMGPALGAGIER	A	2	3.4469
				5	81	1459.71	M(+16)GPAM(+16)GPALGAGIER	A,B	2	3.4469
				6	95	1752.87	VGEVTYVELLMDAEGK	B	2	5.3719
				7	97	1768.87	VGEVTYVELLM(+16)DAEGK	A,B,D	2	5.3719
Serial#	Gi	Protein Name	Comment	# identified peptides	Sources
83	862457	enoyl-CoA hydratase/3-hydroxyacyl-CoA dehydrogenase alpha-subunit of trifunctional protein [Homo sap ...		4	B,A
	20127408	hydroxyacyl dehydrogenase, subunit A [Homo sapiens]
	62702215	unknown [Homo sapiens]			> Score >	Mass	Sequence	Sources	charge	xCorr	4	3	0	0
				1	89	1040.54	FVDLYGAQK	A,B	2	2.7109
				2	88	1203.61	GFYIYQEGVK	A,B	2	3.0901
				3	80	1411.63	SEVSSDEDIQFR	B	2	3.4157
				4	83	1411.63	SEVSSDEDIQFR	A	2	3.4157
				5	85	1593.8	FGGGNPELLTQM(+16)VSK	A	2	3.2134
Serial#	Gi	Protein Name	Comment	# identified peptides	Sources
84	55637005	PREDICTED: similar to Apolipoprotein A-I precursor (Apo-AI) [Pan troglodytes]		4	D,C,B
					> Score >	Mass	Sequence	Sources	charge	xCorr	0	2	2	4
				1	84	1230.71	QGLLPVLESFK	B,C,D	2	2.6079
				2	95	1386.71	VSFLSALEEYTK	B,D	2	4.0777
				3	81	1400.67	DYVSQFEGSALGK	D	2	3.2802
				4	92	1612.79	LLDNWDSVTSTFSK	C,D	2	4.7211
Serial#	Gi	Protein Name	Comment	# identified peptides	Sources
85	86373534	histone H2A.1 [Rattus norvegicus]		4	B,A
	87578157	Similar to H2A histone family, member Y isoform 2 [Bos taurus]
	94395007	PREDICTED: similar to H2A histone family, member Y isoform 5 [Mus musculus]
	94396065	PREDICTED: similar to H2A histone family, member Y isoform 3 [Mus musculus]
	94396067	PREDICTED: similar to H2A histone family, member Y isoform 4 [Mus musculus]
	76623103	PREDICTED: similar to H2A histone family, member Y isoform 2 isoform 6 [Bos taurus]
	76623105	PREDICTED: similar to H2A histone family, member Y isoform 2 isoform 7 [Bos taurus]
	76623107	PREDICTED: similar to H2A histone family, member Y isoform 2 isoform 8 [Bos taurus]
	76623109	PREDICTED: similar to H2A histone family, member Y isoform 2 isoform 2 [Bos taurus]
	8393519	H2A histone family, member Y [Rattus norvegicus]
	3493529	histone macroH2A1.2 [Homo sapiens]
	20336746	H2A histone family, member Y isoform 1 [Homo sapiens]
	41152517	H2A histone family, member Y [Mus musculus]
	93141018	H2A histone family, member Y isoform 3 [Homo sapiens]
	10435335	unnamed protein product [Homo sapiens]
	4758496	H2A histone family, member Y isoform 2 [Homo sapiens]
	63100748	H2A histone family, member Y, isoform 3 [Homo sapiens]
	32492946	medulloblastoma antigen MU-MB-50.205 [Homo sapiens]
	94396063	PREDICTED: similar to H2A histone family, member Y isoform 1 isoform 2 [Mus musculus]			> Score >	Mass	Sequence	Sources	charge	xCorr	3	2	0	0
				1	70	985.604	QTAAQLILK	A,B	2	2.2407
				2	91	1986.14	GVTIASGGVLPNIHPELLAK	A	3	3.4075
				3	85	1334.8	GKLEAIITPPPAK	A	2	3.3152
				4	84	1623.8	AISSYFVSTM(+16)SSSIK	B	2	3.6215
Serial#	Gi	Protein Name	Comment	# identified peptides	Sources
86	2804273	alpha actinin 4 [Homo sapiens]		4	B,A
	74211830	unnamed protein product [Mus musculus]
	76641255	PREDICTED: similar to actinin, alpha 4 isoform 2 [Bos taurus]
	76641257	PREDICTED: similar to actinin, alpha 4 isoform 3 [Bos taurus]
	76641261	PREDICTED: similar to actinin, alpha 4 isoform 1 [Bos taurus]
	76641263	PREDICTED: similar to actinin, alpha 4 isoform 5 [Bos taurus]
	76641265	PREDICTED: similar to actinin, alpha 4 isoform 6 [Bos taurus]
	76641267	PREDICTED: similar to actinin, alpha 4 isoform 7 [Bos taurus]
	76641269	PREDICTED: similar to actinin, alpha 4 isoform 8 [Bos taurus]
	76641271	PREDICTED: similar to actinin, alpha 4 isoform 9 [Bos taurus]
	76641273	PREDICTED: similar to actinin, alpha 4 isoform 10 [Bos taurus]
	76641275	PREDICTED: similar to actinin, alpha 4 isoform 11 [Bos taurus]
	13477151	Actinin, alpha 4 [Homo sapiens]
	15488987	Actinin alpha 4 [Mus musculus]
	38197444	Alpha actinin 4 [Rattus norvegicus]			> Score >	Mass	Sequence	Sources	charge	xCorr	3	1	0	0
				1	90	1386.77	VGWEQLLTTIAR	A	2	3.7908
				2	83	1429.77	TINEVENQILTR	B	2	2.9279
				3	91	1537.78	FAIQDISVEETSAK	A
				4	83	1741.81	ETTDTDTADQVIASFK	A	2	4.3253
Serial#	Gi	Protein Name	Comment	# identified peptides	Sources
87	38014694	Valosin-containing protein [Rattus norvegicus]		4	D,C,B,A
	74139564	unnamed protein product [Mus musculus]
	74198702	unnamed protein product [Mus musculus]
	74192715	unnamed protein product [Mus musculus]
	77735541	hypothetical protein LOC507345 [Bos taurus]
	55217	murine valosin-containing protein [Mus musculus]
	29144989	Valosin containing protein [Mus musculus]
	26326751	unnamed protein product [Mus musculus]
	30023842	valosin containing protein [Mus musculus]
	26350783	unnamed protein product [Mus musculus]
	48257098	VCP protein [Homo sapiens]			> Score >	Mass	Sequence	Sources	charge	xCorr	2	2	1	1
				1	86	1329.69	WALSQSNPSALR	B	2	3.2359
				2	80	1556.86	LDQLIYIPLPDEK	C	2	2.58
				3	92	1810.99	NAPAIIFIDELDAIAPK	A,D	2	5.2124
				4	89	1923.93	QAAPC(+57)VLFFDELDSIAK	A,B	2	3.8786
Serial#	Gi	Protein Name	Comment	# identified peptides	Sources
88	40849890	plectin 3 [Rattus norvegicus]		3	D,B
					> Score >	Mass	Sequence	Sources	charge	xCorr	0	2	0	1
				1	75	1711.88	MDPSRAIQHEISSLK	B
				2	77 73	1284.73	QRALQALDELK	D
				3	81	1538.85	LLDAQLATGGIVDPR	B	2	3.3835
Serial#	Gi	Protein Name	Comment	# identified peptides	Sources
89	1477646	plectin [Homo sapiens]		2	B,A
	40849944	plectin 11 [Homo sapiens]
	40849940	plectin 8 [Homo sapiens]
	40849942	plectin 10 [Homo sapiens]
	40849938	plectin 7 [Homo sapiens]
	40849936	plectin 6 [Homo sapiens]
	40849934	plectin 3 [Homo sapiens]
	40849932	plectin 2 [Homo sapiens]
	40849930	plectin 1 [Homo sapiens]			> Score >	Mass	Sequence	Sources	charge	xCorr	1	1	0	0
				1	81	1538.85	LLDAQLATGGIVDPR	B	2	3.3835
				2	92	1566.88	APVPASELLASGVLSR	A	2	4.6133
Serial#	Gi	Protein Name	Comment	# identified peptides	Sources
90	38541053	Ppib protein [Rattus norvegicus]		4	D,C,B,A
	27806469	peptidylprolyl isomerase B [Bos taurus]
	11968126	peptidylprolyl isomerase B [Rattus norvegicus]
	4758950	peptidylprolyl isomerase B precursor [Homo sapiens]
	53035	cyclophilin CyP-S1 [Mus musculus]
	15341788	Peptidylprolyl isomerase B [Mus musculus]
	74268324	PPIB protein [Bos taurus]
	48145775	PPIB [Homo sapiens]			> Score >	Mass	Sequence	Sources	charge	xCorr	4	4	2	4
				1	94	1244.72	IEVEKPFAIAK	A,B,D	2	3.8709
				2	92	1286.58	DFMIQGGDFTR	A,B	2	3.6541
				3	80	1286.58	DFMIQGGDFTR	C	2	3.6541
				4	94	1302.58	DFM(+16)IQGGDFTR	A,B,D	2	3.6541
				5	95	1364.71	TVDNFVALATGEK	A,B,C,D	2	4.0411
				6	85	1457.73	DTNGSQFFITTVK	A,B,D	2	4.3234
Serial#	Gi	Protein Name	Comment	# identified peptides	Sources
91	71051290	Eif4a1 protein [Mus musculus]		3	C,B,A
	74139596	unnamed protein product [Mus musculus]
	74187323	unnamed protein product [Mus musculus]
	50820	unnamed protein product [Mus musculus]
	4503529	eukaryotic translation initiation factor 4A, isoform 1 [Homo sapiens]
	73966207	PREDICTED: similar to eukaryotic translation initiation factor 4A, isoform 1 isoform 1 [Canis famili ...			> Score >	Mass	Sequence	Sources	charge	xCorr	1	3	2	0
				1	84 84	1605.83	KGVAINM(+16)VTEEDKR	B	2	1.2619
				2	92 88	1140.67	ATQALVLAPTR	B,C	2	2.8915
				3	95	1394.69	GYDVIAQAQSGTGK	A,B,C	2	4.8353
Serial#	Gi	Protein Name	Comment	# identified peptides	Sources
92	885684	thymopoietin beta [Homo sapiens]		4	D,B,A
	885683	thymopoietin alpha [Homo sapiens]
	62088174	Lamina-associated polypeptide 2, isoforms beta/gamma variant [Homo sapiens]
	4507555	thymopoietin isoform alpha [Homo sapiens]
	73760405	thymopoietin isoform beta [Homo sapiens]
	73760401	thymopoietin isoform gamma [Homo sapiens]
	913174	TRPP [Homo sapiens]			> Score >	Mass	Sequence	Sources	charge	xCorr	2	3	0	2
				1	83	1330.71	YGVNPGPIVGTTR	A	2	2.6087
				2	89	1330.71	YGVNPGPIVGTTR	B,D	2	2.6087
				3	90	1647.82	SSTPLPTISSSAENTR	B	2	2.164
				4	76	1697.88	SELVANNVTLPAGEQR	A,D	2	3.7743
				5	80	2570.21	GPPDFSSDEEREPTPVLGSGAAAAGR	B	3	3.0131
Serial#	Gi	Protein Name	Comment	# identified peptides	Sources
93	48146259	CCT2 [Homo sapiens]		4	C,B,A
	54696794	chaperonin containing TCP1, subunit 2 (beta) [Homo sapiens]			> Score >	Mass	Sequence	Sources	charge	xCorr	2	4	1	0
				1	83	1251.71	GSGNLEAIHIIK	B	2	2.8067
				2	80	1330.66	GATQQILDEAER	A	2	3.5814
				3	84	1330.66	GATQQILDEAER	C	2	3.5814
				4	89 82	1330.66	GATQQILDEAER	B	2	3.5814
				5	90	2097.12	LALVTGGEIASTFDHPELVK	B	3	2.0314
				6	82	1517.89	LTSFIGAIAIGDLVK	A	2	3.8349
				7	90	1517.89	LTSFIGAIAIGDLVK	B	2	3.8349
Serial#	Gi	Protein Name	Comment	# identified peptides	Sources
94	4505047	lumican precursor [Homo sapiens]		4	D,C,B,A
					> Score >	Mass	Sequence	Sources	charge	xCorr	4	1	3	1
				1	99	1297.67	SLEDLQLTHNK	A,C	2	3.7498
				2	90	1668.86	SLEYLDLSFNQIAR	A	2	4.0829
				3	88	1957.1	LPSGLPVSLLTLYLDNNK	A,B,C	2	5.1428
				4	89	2536.26	NIPTVNENLENYYLEVNQLEK	A,C,D	2	4.8624
Serial#	Gi	Protein Name	Comment	# identified peptides	Sources
95	48256839	mitochondrial aldehyde dehydrogenase 2 [Homo sapiens]		3	B,A
	48146099	ALDH2 [Homo sapiens]
	25777732	mitochondrial aldehyde dehydrogenase 2 precursor [Homo sapiens]
	62898307	mitochondrial aldehyde dehydrogenase 2 precursor variant [Homo sapiens]			> Score >	Mass	Sequence	Sources	charge	xCorr	1	3	0	0
				1	96	1599.79	ELGEYGLQAYTEVK	A,B	2	4.0366
				2	88	1789.83	TFVQEDIYDEFVER	B	2	5.3481
				3	96	1844.05	VAEQTPLTALYVANLIK	B	2	4.4462
Serial#	Gi	Protein Name	Comment	# identified peptides	Sources
96	89057283	PREDICTED: similar to actin-related protein 2 [Homo sapiens]		2	B,A
					> Score >	Mass	Sequence	Sources	charge	xCorr	1	2	0	0
				1	85	1350.63	DLM(+16)VGDEASELR	B	2	2.6794
				2	86 86	1369.78	ILLTEPLMNPTK	A,B	2	3.1983
Serial#	Gi	Protein Name	Comment	# identified peptides	Sources
97	4826898	profilin 1 [Homo sapiens]		3	D,C,B
					> Score >	Mass	Sequence	Sources	charge	xCorr	0	2	2	3
				1	84	1213.62	DSPSVWAAVPGK	C	2	2.0979
				2	91	1213.62	DSPSVWAAVPGK	B,D	2	2.0979
				3	99	1625.75	DSLLQDGEFSMDLR	B,D	2	5.3591
				4	99	1641.75	DSLLQDGEFSM(+16)DLR	B,D	2	5.3591
				5	79	1643.94	TFVNITPAEVGVLVGK	C,D	2	4.3952
Serial#	Gi	Protein Name	Comment	# identified peptides	Sources
98	30823	diacylglycerol kinase [Homo sapiens]		3	B,A
	41872500	diacylglycerol kinase, alpha 80kDa [Homo sapiens]
	21618887	DGKA protein [Homo sapiens]			> Score >	Mass	Sequence	Sources	charge	xCorr	2	3	0	0
				1	84 74	1013.59	VITDPDILK	A,B	2	1.9177
				2	88	1217.65	IYLEVDNVPR	B	2	3.101
				3	90	1581.75	TM(+16)DDLNLSTSEALR	B	2	4.7369
				4	94 86	1581.75	TM(+16)DDLNLSTSEALR	A	2	4.7369
Serial#	Gi	Protein Name	Comment	# identified peptides	Sources
99	83320094	far upstream element (FUSE) binding protein 1 [Rattus norvegicus]		3	B,A
	26325406	unnamed protein product [Mus musculus]
	74198585	unnamed protein product [Mus musculus]
	74206095	unnamed protein product [Mus musculus]
	84662730	far upstream element (FUSE) binding protein 1 [Mus musculus]
	16878077	FUBP1 protein [Homo sapiens]
	76662850	PREDICTED: similar to Far upstream element binding protein 1 (FUSE binding protein 1) (FBP) (DNA hel ...
	15928578	Fubp1 protein [Mus musculus]
	17402900	far upstream element-binding protein [Homo sapiens]
	40225729	FUBP1 protein [Homo sapiens]			> Score >	Mass	Sequence	Sources	charge	xCorr	3	2	0	0
				1	81	957.562	LLDQIVEK	A	2	2.1564
				2	93	1336.72	IGGNEGIDVPIPR	A,B	2	4.1053
				3	84	1352.72	IQIAPDSGGLPER	A,B	2	3.1592
Serial#	Gi	Protein Name	Comment	# identified peptides	Sources
100	12843097	unnamed protein product [Mus musculus]		2	D,C,B
	74178135	unnamed protein product [Mus musculus]
	74152890	unnamed protein product [Mus musculus]			> Score >	Mass	Sequence	Sources	charge	xCorr	0	2	2	1
				1	88	1071.64	LLLIGDSGVGK	B,C,D	2	3.2016
				2	95 95	1316.66	LQIWDTAGQER	B,C	2	3.4371
Serial#	Gi	Protein Name	Comment	# identified peptides	Sources
101	12653507	Aspartate aminotransferase 2, precursor [Homo sapiens]		3	B,A
	62898103	aspartate aminotransferase 2 precursor variant [Homo sapiens]
	73486658	aspartate aminotransferase 2 precursor [Homo sapiens]			> Score >	Mass	Sequence	Sources	charge	xCorr	3	2	0	0
				1	92	1267.74	IAAAILNTPDLR	A	2	2.4245
				2	88	1267.74	IAAAILNTPDLR	B	2	2.4245
				3	94	1449.81	FVTVQTISGTGALR	A	2	4.3533
				4	93	1530.8	ASAELALGENSEVLK	A,B	2	4.0974
Serial#	Gi	Protein Name	Comment	# identified peptides	Sources
102	55743096	collagen, type XIV, alpha 1 [Homo sapiens]		3	B,A
					> Score >	Mass	Sequence	Sources	charge	xCorr	3	1	0	0
				1	93	1390.72	NLVVGDETTSSLR	A	2	3.3304
				2	94	1497.79	NSDPLVGVILDNGGK	A	2	3.5974
				3	79	2791.4	IVYNNADGTEINEVEVDPITTFPLK	B	2	4.6034
				4	95	2791.4	IVYNNADGTEINEVEVDPITTFPLK	A	2	4.6034
Serial#	Gi	Protein Name	Comment	# identified peptides	Sources
103	12803567	TAGLN2 protein [Homo sapiens]		3	B,A
	9910901	Transgelin-2
	61888874	transgelin 2 [Bos taurus]
	74204347	unnamed protein product [Mus musculus]
	40788953	KIAA0120 [Homo sapiens]
	55960374	transgelin 2 [Homo sapiens]
	94365804	PREDICTED: similar to transgelin 2 [Mus musculus]
	54038641	Transgelin 2 (predicted) [Rattus norvegicus]
	55960373	transgelin 2 [Homo sapiens]
	50510369	mKIAA0120 protein [Mus musculus]
	55960375	transgelin 2 [Homo sapiens]
	14290595	Transgelin 2 [Mus musculus]			> Score >	Mass	Sequence	Sources	charge	xCorr	3	2	0	0
				1	97	1215.69	TLMNLGGLAVAR	A	2	3.5672
				2	78	1231.69	TLM(+16)NLGGLAVAR	A	2	3.5672
				3	94	1594.72	DDGLFSGDPNWFPK	A,B	2	4.9107
				4	95 95	1678.82	QMEQISQFLQAAER	A,B	2	4.6282
Serial#	Gi	Protein Name	Comment	# identified peptides	Sources
104	4505621	prostatic binding protein [Homo sapiens]		3	D,C,B,A
	4261934	neuropolypeptide h3 [Homo sapiens]			> Score >	Mass	Sequence	Sources	charge	xCorr	2	3	2	2
				1	97	1560.83	LYTLVLTDPDAPSR	A,B,C,D	2	5.6358
				2	72	1632.8	NRPTSISWDGLDSGK	B	2	4.3456
				3	97	1949.94	GNDISSGTVLSDYVGSGPPK	A,B,C,D	2	6.033
Serial#	Gi	Protein Name	Comment	# identified peptides	Sources
105	54696696	annexin A1 [Homo sapiens]		3	D,C,B,A
					> Score >	Mass	Sequence	Sources	charge	xCorr	2	2	1	1
				1	97	1550.82	GTDVNVFNTILTTR	A,D	2	4.0281
				2	79	2356.16	GGPGSAVSPYPTFNPSSDVAALHK	B,C	3	3.8477
				3	92	1702.89	GLGTDEDTLIEILASR	A	2	4.5708
				4	83	1702.89	GLGTDEDTLIEILASR	B	2	4.5708
Serial#	Gi	Protein Name	Comment	# identified peptides	Sources
106	38328242	Stmn1 protein [Rattus norvegicus]		3	D,C,B,A
	55586549	PREDICTED: hypothetical protein XP_513222 [Pan troglodytes]
	62088144	stathmin 1 variant [Homo sapiens]			> Score >	Mass	Sequence	Sources	charge	xCorr	3	3	2	1
				1	93 92	1074.57	DLSLEEIQK	A,B,C	2	2.8936
				2	92	1326.69	ESVPEFPLSPPK	A,B,C,D	2	2.5791
				3	81	1326.69	ESVPEFPLSPPK	A	2	2.5791
				4	96	1388.75	ASGQAFELILSPR	A,B	2	4.0965
Serial#	Gi	Protein Name	Comment	# identified peptides	Sources
107	18204442	Ribosomal protein L18 [Homo sapiens]		3	D,B,A
	55649555	PREDICTED: similar to ribosomal protein L18; 60S ribosomal protein L18 [Pan troglodytes]
	62752012	ribosomal protein L18 [Bos taurus]			> Score >	Mass	Sequence	Sources	charge	xCorr	3	2	0	2
				1	88	1250.67	TNSTFNQVVLK	A	2	3.1249
				2	99	1345.73	TAVVVGTITDDVR	A,B,D	2	4.6263
				3	99	1460.8	ILTFDQLALDSPK	A,B,D	2	4.7109
Serial#	Gi	Protein Name	Comment	# identified peptides	Sources
108	32425722	VAT1 protein [Homo sapiens]		3	C,B,A
	74192960	unnamed protein product [Mus musculus]
	74193292	unnamed protein product [Mus musculus]
	76671278	PREDICTED: similar to vesicle amine transport protein 1 isoform 1 [Bos taurus]
	76671280	PREDICTED: similar to vesicle amine transport protein 1 homolog (T californica) isoform 3 [Bos tauru ...
	71119312	Vesicle amine transport protein 1 homolog (T californica) [Mus musculus]
	75516467	Vesicle amine transport protein 1 homolog (T californica) [Rattus norvegicus]
	38014018	Vesicle amine transport protein 1 [Homo sapiens]
	1698401	VatI [Homo sapiens]
	55715891	Vat1 protein [Mus musculus]			> Score >	Mass	Sequence	Sources	charge	xCorr	1	2	1	0
				1	72	1479.79	VVTYGM(+16)ANLLTGPK	A	2	1.9796
				2	87	1510.78	TVENVTVFGTASASK	B	2	3.192
				3	82	1510.78	TVENVTVFGTASASK	B,C	2	3.192
				4	85	1574.77	GVDIVMDPLGGSDTAK	B	2	4.0215
				5	91	1590.77	GVDIVM(+16)DPLGGSDTAK	B	2	4.0215
Serial#	Gi	Protein Name	Comment	# identified peptides	Sources
109	78395029	Fibrinogen, beta chain, preproprotein [Homo sapiens]		3	D,C,A
	76826840	Fibrinogen, beta chain, preproprotein [Homo sapiens]			> Score >	Mass	Sequence	Sources	charge	xCorr	1	0	3	1
				1	86	1275.56	DNDGWLTSDPR	C	2	2.535
				2	87	1951	EEAPSLRPAPPPISGGGYR	C	3	2.5033
				3	95	1768.79	DNENVVNEYSSELEK	A,C,D	2	4.5603
Serial#	Gi	Protein Name	Comment	# identified peptides	Sources
110	895845	p64 CLCP [Homo sapiens]		3	D,C,B,A
	4588526	nuclear chloride channel [Homo sapiens]
	4337097	CLIC1 [Homo sapiens]
	62898319	chloride intracellular channel 1 variant [Homo sapiens]
	55961616	chloride intracellular channel 1 [Homo sapiens]
	55961617	chloride intracellular channel 1 [Homo sapiens]			> Score >	Mass	Sequence	Sources	charge	xCorr	3	1	1	1
				1	87 80	1037.54	GFTIPEAFR	A	2	1.4103
				2	91	1844.97	LAALNPESNTAGLDIFAK	A,B,C,D	2	5.4719
				3	74	2573.1	EEFASTC(+57)PDDEEIELAYEQVAK	A	2	3.1724
Serial#	Gi	Protein Name	Comment	# identified peptides	Sources
111	184749	immunoglobulin alpha-1 heavy chain constant region [Homo sapiens]		3	C,B,A
	34526163	unnamed protein product [Homo sapiens]
	34526199	unnamed protein product [Homo sapiens]
	34527233	unnamed protein product [Homo sapiens]
	34527259	unnamed protein product [Homo sapiens]
	34527275	unnamed protein product [Homo sapiens]
	34527280	unnamed protein product [Homo sapiens]
	34527290	unnamed protein product [Homo sapiens]
	34527351	unnamed protein product [Homo sapiens]
	34527679	unnamed protein product [Homo sapiens]
	12054070	immunoglobulin heavy chain constant region alpha 1 [Homo sapiens]
	34531264	unnamed protein product [Homo sapiens]
	34532724	unnamed protein product [Homo sapiens]
	34533060	unnamed protein product [Homo sapiens]
	34535864	unnamed protein product [Homo sapiens]
	34536000	unnamed protein product [Homo sapiens]
	34536154	unnamed protein product [Homo sapiens]
	34535045	unnamed protein product [Homo sapiens]
	89037933	PREDICTED: similar to Ig alpha-1 chain C region isoform 1 [Homo sapiens]
	56789800	IGHA1 protein [Homo sapiens]
	50301689	immunoglobulin alpha 1 heavy chain constant region [Homo sapiens]
	3201900	SNC73 protein [Homo sapiens]
	16554028	unnamed protein product [Homo sapiens]
	14042015	unnamed protein product [Homo sapiens]
	22760231	unnamed protein product [Homo sapiens]
	34529119	unnamed protein product [Homo sapiens]
	17224464	SNC66 protein [Homo sapiens]
	34364645	hypothetical protein [Homo sapiens]
	34364649	hypothetical protein [Homo sapiens]
	34365128	hypothetical protein [Homo sapiens]
	16741036	IGHA1 protein [Homo sapiens]
	21619010	IGHA1 protein [Homo sapiens]
	13543597	IGHA1 protein [Homo sapiens]
	49257464	IGHA1 protein [Homo sapiens]
	62204992	IGHA1 protein [Homo sapiens]			> Score >	Mass	Sequence	Sources	charge	xCorr	1	2	3	0
				1	96 90	1213.63	WLQGSQELPR	A,B,C	2	3.7336
				2	97	1540.73	DASGVTFTWTPSSGK	B,C	2	4.0514
				3	89	1835.95	QEPSQGTTTFAVTSILR	C	2	3.8699
Serial#	Gi	Protein Name	Comment	# identified peptides	Sources
112	21903394	Chromobox protein homolog 3 (Heterochromatin protein 1 homolog gamma) (HP1 gamma) (Modifier 2 protei ...		3	B,A
	82951729	PREDICTED: similar to chromobox homolog 3 [Mus musculus]
	83014973	PREDICTED: similar to chromobox homolog 3 [Mus musculus]
	83699396	chromobox homolog 3 (Drosophila HP1 gamma) [Mus musculus]
	83699408	chromobox homolog 3 (Drosophila HP1 gamma) [Mus musculus]
	20544151	chromobox homolog 3 [Homo sapiens]
	7416937	heterochromatin-like protein 1 [Homo sapiens]
	53165	modifier 2 [Mus musculus]
	82913885	PREDICTED: similar to chromobox homolog 3 isoform 2 [Mus musculus]			> Score >	Mass	Sequence	Sources	charge	xCorr	2	3	0	0
				1	81	1533.73	VEEAEPEEFVVEK	A,B	2	3.7637
				2	96	1661.83	KVEEAEPEEFVVEK	A,B	2	4.8709
				3	85	1728.86	IIGATDSSGELM(+16)FLMK	B	2	4.2681
Serial#	Gi	Protein Name	Comment	# identified peptides	Sources
113	28173550	cell division cycle 10 homolog [Mus musculus]		3	B,A
	74184369	unnamed protein product [Mus musculus]
	76879700	predicted protein product of Nbla02942 [Homo sapiens]
	12018296	septin 7 [Rattus norvegicus]
	45595745	CDC10 protein [Homo sapiens]
	62088934	CDC10 protein variant [Homo sapiens]
	37590095	Cell division cycle 10 homolog [Mus musculus]
	560623	CDC10 homolog [Homo sapiens]
	62898011	cell division cycle 10 variant [Homo sapiens]
	62898043	cell division cycle 10 variant [Homo sapiens]
	26354124	unnamed protein product [Mus musculus]
	62739904	SEPT7 protein [Homo sapiens]
	45645169	cell division cycle 10 [Bos taurus]
	60360112	mKIAA4020 protein [Mus musculus]
	34783371	CDC10 protein [Homo sapiens]
	78057661	septin 7 [Homo sapiens]			> Score >	Mass	Sequence	Sources	charge	xCorr	3	2	0	0
				1	96	1243.56	FEDYLNAESR	A,B	2	3.7894
				2	70	1566.69	ADTLTPEEC(+57)QQFK	A	2	1.7692
				3	81	1757.74	IYEFPETDDEEENK	A,B	2	3.2624
Serial#	Gi	Protein Name	Comment	# identified peptides	Sources
114	15030150	Phosphogluconate dehydrogenase [Mus musculus]		3	B,A
	74207349	unnamed protein product [Mus musculus]
	94372948	PREDICTED: similar to 6-phosphogluconate dehydrogenase, decarboxylating isoform 9 [Mus musculus]
	94374016	PREDICTED: similar to 6-phosphogluconate dehydrogenase, decarboxylating isoform 3 [Mus musculus]
	12653201	Phosphogluconate dehydrogenase [Homo sapiens]
	82896232	PREDICTED: similar to 6-phosphogluconate dehydrogenase, decarboxylating isoform 6 [Mus musculus]
	984325	phosphogluconate dehydrogenase [Homo sapiens]
	94374014	PREDICTED: similar to 6-phosphogluconate dehydrogenase, decarboxylating isoform 4 [Mus musculus]			> Score >	Mass	Sequence	Sources	charge	xCorr	1	2	0	0
				1	88	1121.55	VDDFLANEAK	B	2	3.3088
				2	87	1192.59	AGQAVDDFIEK	A	2	2.4959
				3	97	1705.88	NPELQNLLLDDFFK	B	2	5.2706
Serial#	Gi	Protein Name	Comment	# identified peptides	Sources
115	1304128	polyubiquitin [Homo sapiens]		3	D,C,B,A
	2627129	polyubiquitin [Homo sapiens]
	73695428	Ubc protein [Rattus norvegicus]
	12849189	unnamed protein product [Mus musculus]			> Score >	Mass	Sequence	Sources	charge	xCorr	3	3	2	3
				1	99	1067.62	ESTLHLVLR	A,B,C,D	2	2.9129
				2	93	1081.55	TLSDYNIQK	A,B,D	2	2.9491
				3	85 85	1787.93	TITLEVEPSDTIENVK	A,B,C,D	2	4.4715
				4	72 72	1787.93	TITLEVEPSDTIENVK	D	2	4.4715
Serial#	Gi	Protein Name	Comment	# identified peptides	Sources
116	17389815	Triosephosphate isomerase 1 [Homo sapiens]		3	D,B,A
	47682755	TPI1 protein [Homo sapiens]
	13937950	TPI1 protein [Homo sapiens]
	62896835	triosephosphate isomerase 1 variant [Homo sapiens]			> Score >	Mass	Sequence	Sources	charge	xCorr	2	2	0	2
				1	73 70	1414.79	QSLGELIGTLNAAK	B,D	2	2.9481
				2	87	1602.89	VVLAYEPVWAIGTGK	A,B,D	2	3.7053
				3	75	1637.83	VTNGAFTGEISPGM(+16)IK	A	2	2.5398
Serial#	Gi	Protein Name	Comment	# identified peptides	Sources
117	4092054	GTP binding protein [Homo sapiens]		3	B,A
	12846283	unnamed protein product [Mus musculus]
	74208259	unnamed protein product [Mus musculus]
	20978314	GTP-ase Ran [Rattus norvegicus]
	32425497	RAN protein [Homo sapiens]
	48734884	Ras-related nuclear protein [Homo sapiens]
	50979248	ras-related nuclear protein [Canis familiaris]
	51859530	Hypothetical protein LOC313163 [Rattus norvegicus]
	94373209	PREDICTED: similar to GTP-binding nuclear protein Ran (GTPase Ran) (Ras-like protein TC4) [Mus muscu ...			> Score >	Mass	Sequence	Sources	charge	xCorr	3	2	0	0
				1	87 81	1015.58	LVLVGDGGTGK	A	2	2.079
				2	75	1214.61	NLQYYDISAK	B	2	2.4791
				3	89 80	1214.61	NLQYYDISAK	A	2	2.4791
				4	88	1294.61	FNVWDTAGQEK	A,B	2	4.3966
Serial#	Gi	Protein Name	Comment	# identified peptides	Sources
118	87578213	Phosphoribosylaminoimidazole carboxylase [Bos taurus]		3	B
	16307450	Phosphoribosylaminoimidazole carboxylase [Homo sapiens]
	51491236	hypothetical protein [Homo sapiens]
	37962708	phosphoribosylaminoimidazole carboxylase; phosphoribosylaminoimidazole succinocarboxamide synthetase ...			> Score >	Mass	Sequence	Sources	charge	xCorr	0	3	0	0
				1	87	1050.5	NFEWVAER	B	2	2.9287
				2	72	1230.64	EVTPEGLQMVK	B	2	1.3491
				3	89	1249.63	EVYELLDSPGK	B	2	2.211
Serial#	Gi	Protein Name	Comment	# identified peptides	Sources
119	32891807	biliverdin reductase B (flavin reductase (NADPH)) [Homo sapiens]		3	D,C,B
					> Score >	Mass	Sequence	Sources	charge	xCorr	0	1	3	2
				1	94	1477.69	NDLSPTTVMSEGAR	C,D	2	4.2504
				2	98	1512.88	TVAGQDAVIVLLGTR	C,D	2	5.2746
				3	86	1512.88	TVAGQDAVIVLLGTR	B	2	5.2746
				4	87	2671.36	YVAVMPPHIGDQPLTGAYTVTLDGR	C	3	4.1454
				5	83	2687.36	YVAVM(+16)PPHIGDQPLTGAYTVTLDGR	C	3	4.1454
Serial#	Gi	Protein Name	Comment	# identified peptides	Sources
120	7161769	type II hair keratin 3 [Homo sapiens]		3	B
	15431316	keratin, hair, basic, 4 [Homo sapiens]
	42760016	type II hair keratin 4 [Homo sapiens]			> Score >	Mass	Sequence	Sources	charge	xCorr	0	3	0	0
				1	86	1213.62	SVITFGSYSPR	B	2	1.7936
				2	90 88	1299.71	DLNLDGIIAEVK	B	2	3.5181
				3	95	1793.98	SLLTPLNLEIDPNAQR	B	2	4.6903
Serial#	Gi	Protein Name	Comment	# identified peptides	Sources
121	1173072	60S acidic ribosomal protein P2		3	D,B
	55635097	PREDICTED: similar to 60S acidic ribosomal protein P2 [Pan troglodytes]			> Score >	Mass	Sequence	Sources	charge	xCorr	0	3	0	1
				1	92	1256.68	NIEDVIAQGIGK	D	2	3.4636
				2	73	1256.68	NIEDVIAQGIGK	D	2	3.4636
				3	95	1256.68	NIEDVIAQGIGK	B	2	3.4636
				4	83	2774.43	LASVPAGGAVAVSAAPGSAAPAAGSAPAAAEEK	B	3	4.1391
				5	88	1868.97	YVASYLLAALGGNSSPSAK	B	2	3.9042
Serial#	Gi	Protein Name	Comment	# identified peptides	Sources
122	89513702	solute carrier family 4 anion exchanger member 1 variant [Homo sapiens]		3	D,C
	68563369	Solute carrier family 4, anion exchanger, member 1 (erythrocyte membrane protein band 3, Diego blood ...
	75517725	Solute carrier family 4, anion exchanger, member 1 (erythrocyte membrane protein band 3, Diego blood ...
	28714	unnamed protein product [Homo sapiens]			> Score >	Mass	Sequence	Sources	charge	xCorr	0	0	3	1
				1	77	1466.82	IPPDSEATLVLVGR	C	2	3.5942
				2	89	1490.8	ADFLEQPVLGFVR	C	2	4.0524
				3	97	1877.04	LQEAAELEAVELPVPIR	C,D	2	5.1348
Serial#	Gi	Protein Name	Comment	# identified peptides	Sources
123	9508585	tropomyosin isoform [Homo sapiens]		3	C,B,A
	62643678	PREDICTED: tropomyosin isoform 6 [Rattus norvegicus]
	73961069	PREDICTED: similar to Tropomyosin alpha 3 chain (Tropomyosin 3) (Tropomyosin gamma) (hTM5) isoform 4 ...
	52353308	tropomyosin 3, gamma isoform 1 [Rattus norvegicus]
	20809750	Tropomyosin 3, gamma [Mus musculus]
	73961113	PREDICTED: similar to tropomyosin 3 isoform 2 isoform 24 [Canis familiaris]
	55665784	tropomyosin 3 [Homo sapiens]
	11596387	tropomyosin 3 [Mus musculus]
	54912	unnamed protein product [Mus musculus]
	26341416	unnamed protein product [Mus musculus]
	55593362	PREDICTED: similar to tropomyosin 3 [Pan troglodytes]
	19072649	TPMsk3 [Homo sapiens]
	73961099	PREDICTED: similar to tropomyosin 3 isoform 2 isoform 17 [Canis familiaris]
	29336093	tropomyosin 3, gamma isoform 2 [Rattus norvegicus]
	55665783	tropomyosin 3 [Homo sapiens]			> Score >	Mass	Sequence	Sources	charge	xCorr	1	2	1	0
				1	84 80	1727.89	IQLVEEELDRAQER	A,B	3	1.8538
				2	86	1243.65	IQLVEEELDR	C	2	3.2967
				3	78 78	1961.03	ALKDEEKM(+16)ELQEIQLK	B	3	2.4266
Serial#	Gi	Protein Name	Comment	# identified peptides	Sources
124	1711240	TIS [Mus musculus]		3	D,B,A
	80477437	Unknown (protein for MGC:102957) [Homo sapiens]
	74204146	unnamed protein product [Mus musculus]
	8393547	heterogeneous nuclear ribonucleoprotein A1 [Rattus norvegicus]
	74220381	unnamed protein product [Mus musculus]
	88958985	PREDICTED: similar to Heterogeneous nuclear ribonucleoprotein A1 (Helix-destabilizing protein) (Sing ...
	76617606	PREDICTED: similar to Heterogeneous nuclear ribonucleoprotein A1 (Helix-destabilizing protein) (Sing ...
	76690572	PREDICTED: similar to Heterogeneous nuclear ribonucleoprotein A1 (Helix-destabilizing protein) (Sing ...
	75517570	HNRPA1 protein [Homo sapiens]
	56971262	Hnrpa1 protein [Rattus norvegicus]
	36102	unnamed protein product [Homo sapiens]
	62897249	heterogeneous nuclear ribonucleoprotein A1 isoform a variant [Homo sapiens]
	62531241	Heterogeneous nuclear ribonucleoprotein A1, isoform b [Mus musculus]
	55957261	OTTHUMP00000018460 [Homo sapiens]
	88953883	PREDICTED: similar to Heterogeneous nuclear ribonucleoprotein A1 (Helix-destabilizing protein) (Sing ...
	89040360	PREDICTED: similar to Heterogeneous nuclear ribonucleoprotein A1 (Helix-destabilizing protein) (Sing ...
	47939618	Heterogeneous nuclear ribonucleoprotein A1, isoform a [Homo sapiens]
	38328245	Hnrpa1 protein [Rattus norvegicus]
	94404313	PREDICTED: similar to Heterogeneous nuclear ribonucleoprotein A1 (Helix-destabilizing protein) (Sing ...
	94404315	PREDICTED: similar to Heterogeneous nuclear ribonucleoprotein A1 (Helix-destabilizing protein) (Sing ...
	94404317	PREDICTED: similar to Heterogeneous nuclear ribonucleoprotein A1 (Helix-destabilizing protein) (Sing ...
	14043070	heterogeneous nuclear ribonucleoprotein A1 isoform b [Homo sapiens]			> Score >	Mass	Sequence	Sources	charge	xCorr	2	2	0	1
				1	82	1234.64	IEVIEIM(+16)TDR	B	2	2.8191
				2	89	1234.64	IEVIEIM(+16)TDR	A,B	2	2.8191
				3	82	1234.64	IEVIEIM(+16)TDR	D	2	2.8191
				4	85 85	1879.97	IFVGGIKEDTEEHHLR	B	3	2.2669
				5	93	1784.91	LFIGGLSFETTDESLR	A	2	4.8382
Serial#	Gi	Protein Name	Comment	# identified peptides	Sources
125	21594169	Ribosomal protein S9-like [Mus musculus]		3	D,C,B,A
	55649873	PREDICTED: similar to ribosomal protein S9-like [Pan troglodytes]
	13592067	ribosomal protein S9 [Rattus norvegicus]			> Score >	Mass	Sequence	Sources	charge	xCorr	2	3	1	2
				1	73	920.52	LIGEYGLR	A,B,D	2	2.1453
				2	88	921.468	IEDFLER	A,B,C,D	2	2.6944
				3	81	1271.75	QVVNIPSFIVR	B	2	2.0667
Serial#	Gi	Protein Name	Comment	# identified peptides	Sources
126	6753492	coronin, actin binding protein 1A [Mus musculus]		3	D,C,B,A
	74192405	unnamed protein product [Mus musculus]
	74207056	unnamed protein product [Mus musculus]
	74181442	unnamed protein product [Mus musculus]
	31418362	Coronin, actin binding protein 1A [Mus musculus]
	5902134	coronin, actin binding protein, 1A [Homo sapiens]
	12805335	Coronin, actin binding protein 1A [Mus musculus]
	18426834	coronin, actin binding protein 1A [Rattus norvegicus]			> Score >	Mass	Sequence	Sources	charge	xCorr	2	3	1	2
				1	75	960.515	QVALWDTK	B	2	2.4698
				2	94	1026.62	DAGPLLISLK	A,B,D	2	3.2605
				3	91	1796.81	VSQTTWDSGFC(+57)AVNPK	A,B,C,D	2	4.2276
				4	86	1796.81	VSQTTWDSGFC(+57)AVNPK	D	2	4.2276
Serial#	Gi	Protein Name	Comment	# identified peptides	Sources
127	15680208	Septin 2 [Homo sapiens]		3	B,A
	40788885	KIAA0158 [Homo sapiens]
	1040689	Human Diff6,H5,CDC10 homologue [Homo sapiens]
	23274163	SEPT2 protein [Homo sapiens]
	84708845	MGC133898 protein [Bos taurus]
	51858574	Septin 2 [Rattus norvegicus]
	6754816	septin 2 [Mus musculus]
	56549636	septin 2 [Homo sapiens]
	62822169	unknown [Homo sapiens]			> Score >	Mass	Sequence	Sources	charge	xCorr	2	2	0	0
				1	86 83	952.619	VNIVPVIAK	A,B	2	2.5656
				2	95	1603.82	TVQIEASTVEIEER	B	2	4.7119
				3	87	1759.96	ASIPFSVVGSNQLIEAK	A	2	2.5043
Serial#	Gi	Protein Name	Comment	# identified peptides	Sources
128	62460492	RNA binding motif protein 14 [Bos taurus]		3	D,B,A
	74139976	unnamed protein product [Mus musculus]
	15022507	coactivator activator [Homo sapiens]
	5454064	RNA binding motif protein 14 [Homo sapiens]
	86262142	RNA binding motif protein 14 [Mus musculus]
	62897219	RNA binding motif protein 14 variant [Homo sapiens]
	12836486	unnamed protein product [Mus musculus]
	16307494	Rbm14 protein [Mus musculus]			> Score >	Mass	Sequence	Sources	charge	xCorr	2	2	0	1
				1	96	1608.84	ASYVAPLTAQPATYR	A,B	2	3.7286
				2	88	2465.18	TQSSASLAASYAAQQHPQAAASYR	A,B	3	3.8593
				3	70	1751.85	IFVGNVSAAC(+57)TSQELR	D	2	2.9155
Serial#	Gi	Protein Name	Comment	# identified peptides	Sources
129	1197210	adenosine deaminase [Homo sapiens]		3	D,B
	25955532	Adenosine deaminase [Homo sapiens]
	62898355	adenosine deaminase variant [Homo sapiens]			> Score >	Mass	Sequence	Sources	charge	xCorr	0	2	0	1
				1	77	1382.73	TVHAGEVGSAEVVK	D	3	0.9865
				2	83	1145.56	IAYEFVEM(+16)K	B	2	2.005
				3	84	1232.51	DMGFTEEEFK	B	2	1.939
Serial#	Gi	Protein Name	Comment	# identified peptides	Sources
130	48145843	HMGB1 [Homo sapiens]		3	D,C,B,A
	62647073	PREDICTED: similar to Hmgb1 protein [Rattus norvegicus]
	74181373	unnamed protein product [Mus musculus]
	82952252	PREDICTED: similar to High mobility group protein 1 (HMG-1) (High mobility group protein B1) (Amphot ...
	82952271	PREDICTED: similar to High mobility group protein 1 (HMG-1) (High mobility group protein B1) (Amphot ...
	83014391	PREDICTED: similar to High mobility group protein 1 (HMG-1) (High mobility group protein B1) (Amphot ...
	968888	HMG-1 [Homo sapiens]
	52789475	High mobility group box 1 [Mus musculus]
	62087576	high-mobility group box 1 variant [Homo sapiens]
	50950133	high-mobility group box 1 [Canis familiaris]
	620098	high mobility group protein [Mus musculus]
	41386729	high-mobility group box 1 [Bos taurus]
	26350077	unnamed protein product [Mus musculus]
	26341410	unnamed protein product [Mus musculus]
	26342222	unnamed protein product [Mus musculus]
	62639125	PREDICTED: similar to High mobility group protein 1 (HMG-1) (Amphoterin) (Heparin-binding protein p3 ...
	55958714	high-mobility group box 1 [Homo sapiens]
	55958715	high-mobility group box 1 [Homo sapiens]
	55958716	high-mobility group box 1 [Homo sapiens]
	55958717	high-mobility group box 1 [Homo sapiens]
	55958718	high-mobility group box 1 [Homo sapiens]
	40352857	Hmgb1 protein [Mus musculus]
	94365112	PREDICTED: similar to High mobility group protein 1 (HMG-1) (High mobility group protein B1) (Amphot ...
	94382103	PREDICTED: similar to High mobility group protein 1 (HMG-1) (High mobility group protein B1) (Amphot ...
	82919469	PREDICTED: similar to High mobility group protein 1 (HMG-1) (High mobility group protein B1) (Amphot ...			> Score >	Mass	Sequence	Sources	charge	xCorr	2	3	1	2
				1	97	1520.84	IKGEHPGLSIGDVAK	A,B,C,D	3	3.9842
				2	78	1592.77	KHPDASVNFSEFSK	A	3	3.3054
				3	89	1592.77	KHPDASVNFSEFSK	A,B	3	3.3054
				4	93	1279.66	GEHPGLSIGDVAK	B,D	2	2.7685
Serial#	Gi	Protein Name	Comment	# identified peptides	Sources
131	14595132	Raichu404X [Homo sapiens]		3	C,B,A
	74220172	unnamed protein product [Mus musculus]
	94389706	PREDICTED: similar to RAS related protein 1b [Mus musculus]
	51859269	RAS related protein 1b [Rattus norvegicus]
	7661678	RAP1B, member of RAS oncogene family [Homo sapiens]
	55587752	PREDICTED: similar to RAS-related protein-1a; GTP-binding protein SMG-P21A [Pan troglodytes]
	54696200	RAP1A, member of RAS oncogene family [Homo sapiens]
	94382232	PREDICTED: similar to Ras-related protein Rap-1A precursor (Ras-related protein Krev-1) [Mus musculu ...			> Score >	Mass	Sequence	Sources	charge	xCorr	3	2	1	0
				1	95 95	985.604	LVVLGSGGVGK	A	2	2.5576
				2	92	1258.56	YDPTIEDSYR	A,B,C	2	2.8225
				3	96	1494.8	INVNEIFYDLVR	A,B	2	4.716
Serial#	Gi	Protein Name	Comment	# identified peptides	Sources
132	14043949	Calreticulin, precursor [Homo sapiens]		3	D,C,B,A
	62897681	calreticulin precursor variant [Homo sapiens]			> Score >	Mass	Sequence	Sources	charge	xCorr	2	2	1	2
				1	81	1410.63	EQFLDGDGWTSR	C,D	2	3.157
				2	91	1607.77	FYALSASFEPFSNK	A,B	2	4.8492
				3	91	2519.19	IDNSQVESGSLEDDWDFLPPKK	A,B,D	3	3.9538
Serial#	Gi	Protein Name	Comment	# identified peptides	Sources
133	3953617	SET [Mus musculus]		3	D,B,A
	545265	Set beta isoform [Rattus sp.]
	83638675	Hypothetical protein LOC538444 [Bos taurus]
	94412096	PREDICTED: similar to SET translocation (myeloid leukemia-associated) [Mus musculus]
	75517035	SET translocation [Mus musculus]
	4506891	SET translocation (myeloid leukemia-associated) [Homo sapiens]
	34604766	inhibitor-2 of protein phosphatase-2A [Homo sapiens]
	55663124	SET translocation (myeloid leukemia-associated) [Homo sapiens]
[truncated: 1,409 more rows]
