# Supplementary material for: Identifying Alternative Hyper-Splicing Signatures in MG-Thymoma by Exon Arrays
Source: PLoS One. 2008 Jun 11;3(6):e2392. doi: 10.1371/journal.pone.0002392 (PMC2409220; doi:10.1371/journal.pone.0002392)
Supplement: Table S1 — Ad-hoc Global Functional BP and MF GO Analysis of Exon Array Colon Cancer Data. Results of Affymetrix exon array colon cancer data set [20] are given for MF and BP. The columns of the Excel table are as indicated: the name of GO term, its GO ID, p-values of the continuous method (KS-P high tail test), testing the hypothesis that the tested distribution contains larger values than the global distribution, of Fisher exact test (Fishex INC, the high tail test) using the hypergeometric distriution (i.e, the discrete method), testing the hypothesis that the tested distribution contains larger than expected number of increased (INC) genes (using a 2-fold cutoff), the KS-P (low tail) testing the hypothesis that the distribution contains smaller values than those observed with the global distribution and Fishex (DEC) for testing the hypothesis that the testes distribution contain larger than expected number of decreased (DEC) genes (using a 2-fold cutoff). N is The number of transcripts associated with the GO term, KS accur (KS accuracy) is a number indicating the reliability of the KS test. The p-value is most accurate when KS accur >4. Additionaly, the percent of transcripts changed above the threshold is given for each category (named % changed genes), and the number of genes changed more then the threshold (named #changed genes). The red and blue cells in the tables indicate the GO terms that significantly increased or decreased, respectively (at significance level of p-value <0.05). (0.62 MB XLS) [file pone.0002392.s014.xls]

## Sheet: Exon_CC_GO_analysis
Supporting Table S1
Exon_CC_MF_GO_analysis
name	GO ID	KS-P	Fishex	KS-P	FISHEX	N	KS	% Changed	# changed
		(high)	(INC)	(low)	(DEC)		accur	Genes	Genes
mannosyltransferase activity	30	1	1	1	1	1	0	0	0
tRNA binding	49	0.00322	0.25119	0.99858	1	5	5	20	1
acyl-CoA binding	62	0.63189	0.25119	0.6558	1	5	5	20	1
L-ornithine transporter activity	64	1	1	1	1	1	0	0	0
sulfur amino acid transporter activity	99	0.91065	1	0.27282	0.05092	2	2	50	1
microfilament motor activity	146	0.61343	1	0.06855	1	4	4	0	0
SNARE binding	149	0.49176	1	0.54596	1	6	6	0	0
two-component sensor molecule activity	155	0.99679	1	0.04588	0.09925	4	4	25	1
protein phosphatase type 1 activity	163	1	1	1	1	1	0	0	0
nucleotide binding	166	0.02084	0.00209	0.97605	0.61151	730	706	11	78
3'-5'-exoribonuclease activity	175	0.16473	0.29328	0.86306	1	6	6	17	1
rRNA (adenine-N6\,N6-)-dimethyltransferase activity	179	0.27163	1	0.83173	1	3	3	0	0
rDNA binding	182	1	1	1	1	1	0	0	0
protein degradation tagging activity	211	0.59885	0.20658	0.42056	1	4	4	25	1
tRNA-intron endonuclease activity	213	0.20536	1	0.76171	1	3	3	0	0
C-5 sterol desaturase activity	248	0.03011	1	0.92795	1	2	2	0	0
nitrilase activity	257	1	1	1	1	1	0	0	0
heterotrimeric G-protein GTPase\, alpha-subunit	263	1	1	1	1	1	0	0	0
heterotrimeric G-protein GTPase\, beta-subunit	264	0.19289	1	0.79411	1	2	2	0	0
peroxisome targeting sequence binding	268	1	1	1	1	1	0	0	0
magnesium ion binding	287	0.04467	0.17381	0.98936	0.82682	67	67	10	7
RNA cap binding	339	0.04219	1	0.83878	1	2	2	0	0
oxidized base lesion DNA N-glycosylase activity	702	1	1	1	1	1	0	0	0
translation repressor activity\, nucleic acid binding	900	1	1	1	1	1	0	0	0
legumain activity	1509	0.44122	1	0.6993	1	2	2	0	0
opioid peptide activity	1515	0.652	1	0.41327	1	2	2	0	0
N-acetylglucosamine 6-O-sulfotransferase activity	1517	0.99057	1	0.02811	1	3	3	0	0
lipopolysaccharide binding	1530	0.88791	1	0.46276	1	2	2	0	0
interleukin-21 receptor activity	1532	1	1	1	1	1	0	0	0
N-acetylgalactosamine 4-O-sulfotransferase activity	1537	0.15304	0.10926	0.98626	1	2	2	50	1
beta-amyloid binding	1540	0.99973	1	0.28252	0.09925	4	4	25	1
phorbol ester receptor activity	1565	0.79846	1	0.05108	1	2	2	0	0
rhodopsin-like receptor activity	1584	0.98661	0.99755	0	0.24349	264	261	6	15
dopamine D2 receptor-like receptor activity	1591	1	1	1	1	1	0	0	0
angiotensin receptor activity	1595	0.65605	1	0.11233	0.39146	19	19	5	1
peptide YY receptor activity	1601	0.9851	1	0.01184	1	2	2	0	0
pancreatic polypeptide receptor activity	1602	1	1	1	1	1	0	0	0
vasopressin-like receptor activity	1603	0.33463	1	0.98008	1	2	2	0	0
urotensin II receptor activity	1604	1	1	1	1	1	0	0	0
neuromedin U receptor activity	1607	1	0.05621	1	1	1	0	100	1
nucleotide receptor activity\, G-protein coupled	1608	0.79745	0.24727	0.19204	0.06997	17	17	24	4
adenosine receptor activity\, G-protein coupled	1609	0.15137	0.10926	0.99219	1	2	2	50	1
A1 adenosine receptor activity\, G-protein coupled	1610	1	0.05621	1	1	1	0	100	1
A2A adenosine receptor activity\, G-protein coupled	1611	1	1	1	1	1	0	0	0
purinergic nucleotide receptor activity	1614	0.79745	0.24727	0.19204	0.06997	17	17	24	4
thyrotropin releasing hormone and secretagogue-like receptors activity	1615	1	1	1	1	1	0	0	0
lysosphingolipid and lysophosphatidic acid receptor activity	1619	0.75764	1	0.18846	1	3	3	0	0
secretin-like receptor activity	1633	0.87934	0.47084	0.08193	1	11	11	9	1
corticotrophin-releasing factor gastric inhibitory peptide-like receptor activity	1636	1	1	1	1	1	0	0	0
G-protein chemoattractant receptor activity	1637	0.57822	1	0.28842	0.5996	35	35	3	1
PLC activating metabotropic glutamate receptor activity	1639	1	1	1	1	1	0	0	0
adenylate cyclase inhibiting metabotropic glutamate receptor activity	1640	1	0.05621	1	1	1	0	100	1
group III metabotropic glutamate receptor activity	1642	1	0.05621	1	1	1	0	100	1
peptide receptor activity	1653	0.9327	0.9957	0.00076	0.9147	94	94	2	2
G-protein-coupled receptor binding	1664	0.0499	0.0003	0.18528	0.19945	32	32	31	10
alpha-N-acetylgalactosaminide alpha-2\,6-sialyltransferase activity	1665	1	1	1	1	1	0	0	0
lipid kinase activity	1727	0.7611	1	0.2573	1	8	8	0	0
galactosylceramide sulfotransferase activity	1733	0.47227	1	0.7918	1	2	2	0	0
opsonin binding	1846	0.35667	0.10926	0.33174	1	2	2	50	1
opsonin receptor activity	1847	0.35667	0.10926	0.33174	1	2	2	50	1
complement binding	1848	0.35667	0.10926	0.33174	1	2	2	50	1
complement component C3a binding	1850	0.35667	0.10926	0.33174	1	2	2	50	1
pattern binding	1871	0.55409	0.14179	0.04285	0.22166	63	63	14	9
nucleic acid binding	3676	0.00158	0.27848	0.8992	0.99997	1729	1595	7	125
DNA binding	3677	0.07908	0.15461	0.45863	0.99392	1304	1228	8	103
DNA helicase activity	3678	0.08822	0.5006	0.94076	1	12	12	8	1
chromatin binding	3682	0.50277	0.37361	0.88208	1	23	23	9	2
lamin/chromatin binding	3683	0.17375	1	0.83597	1	2	2	0	0
damaged DNA binding	3684	2e-05	0.04312	0.98509	1	58	58	12	7
DNA repair protein	3685	0.07817	0.07051	0.83279	1	8	8	25	2
DNA repair enzyme	3686	0.14347	0.15932	0.88198	1	3	3	33	1
DNA replication factor	3687	0.09742	0.15932	0.52861	1	3	3	33	1
double-stranded DNA binding	3690	0.1808	1	0.68362	1	5	5	0	0
left-handed Z-DNA binding	3692	1	1	1	1	1	0	0	0
P-element binding	3693	1	1	1	1	1	0	0	0
satellite DNA binding	3696	0.38869	1	0.68647	1	3	3	0	0
single-stranded DNA binding	3697	0.06787	0.43931	0.83129	0.23	10	10	20	2
transcription factor activity	3700	0.65065	0.18265	0.00644	0.82836	497	486	9	43
RNA polymerase I transcription factor activity	3701	0.95576	1	0.17669	1	4	4	0	0
RNA polymerase II transcription factor activity	3702	0.91174	0.88108	0.01299	0.78833	112	111	5	6
specific RNA polymerase II transcription factor activity	3704	0.63111	0.24727	0.57076	1	17	17	12	2
RNA polymerase II transcription factor activity\, enhancer binding	3705	0.32859	0.29328	0.95884	1	6	6	17	1
ligand-regulated transcription factor activity	3706	0.35132	1	0.29727	1	2	2	0	0
steroid hormone receptor activity	3707	0.72859	1	0.18558	1	22	22	0	0
retinoic acid receptor activity	3708	0.92357	1	0.3855	1	7	7	0	0
RNA polymerase III transcription factor activity	3709	0.08766	0.20658	0.97379	1	4	4	25	1
transcriptional elongation regulator activity	3711	0.8561	1	0.26125	1	5	5	0	0
transcription cofactor activity	3712	0.10431	0.83284	0.56892	0.9612	124	123	5	6
transcription coactivator activity	3713	0.2529	0.92553	0.43202	1	74	74	3	2
transcription corepressor activity	3714	0.1227	0.739	0.4749	1	46	46	4	2
transcription termination factor activity	3715	0.41287	1	0.67373	1	2	2	0	0
transcription factor binding\, cytoplasmic sequestering	3719	0.75232	1	0.31563	1	5	5	0	0
RNA binding	3723	0	0.46334	0.84071	0.99802	237	234	6	15
RNA helicase activity	3724	0.35367	1	0.73256	1	15	15	0	0
double-stranded RNA binding	3725	0.55827	1	0.35495	1	13	13	0	0
single-stranded RNA binding	3727	0.06348	1	0.82872	1	9	9	0	0
mRNA binding	3729	0.05126	1	0.88291	1	12	12	0	0
mRNA 3'-UTR binding	3730	0.22293	1	0.75405	1	3	3	0	0
small nuclear ribonucleoprotein	3734	1	1	1	1	1	0	0	0
structural constituent of ribosome	3735	0	0.71788	0.72793	0.96319	126	125	6	7
translation initiation factor activity	3743	3e-05	0.85198	0.87267	1	33	33	3	1
translation elongation factor activity	3746	0.10248	1	0.6515	1	10	10	0	0
translation release factor activity	3747	0.06845	1	0.91413	1	2	2	0	0
cell cycle regulator	3750	1	1	1	1	1	0	0	0
chaperone activity	3754	0.01907	0.43684	0.86224	0.31946	77	77	10	8
peptidyl-prolyl cis-trans isomerase activity	3755	0.06285	1	0.83686	1	9	9	0	0
protein disulfide isomerase activity	3756	0.21294	1	0.66688	1	5	5	0	0
histone-specific chaperone activity	3762	0.01763	0.20658	0.67746	1	4	4	25	1
chaperonin ATPase activity	3763	1	1	1	1	1	0	0	0
co-chaperone activity	3767	0.60127	1	0.35816	1	3	3	0	0
co-chaperonin activity	3772	0.53344	1	0.12381	1	3	3	0	0
heat shock protein activity	3773	0.04886	0.66698	0.743	0.08509	19	19	16	3
motor activity	3774	0.33506	0.02255	0.22775	0.85585	74	74	14	10
muscle motor activity	3776	0.16356	1	0.50278	1	9	9	0	0
microtubule motor activity	3777	0.01346	0.00532	0.92819	1	21	21	24	5
dynactin motor	3778	0.03563	1	0.57679	1	3	3	0	0
actin binding	3779	0.77766	0.19831	0.01874	0.00297	115	114	16	18
actin cross-linking activity	3780	0.78939	1	0.15224	0.09925	4	4	25	1
actin bundling activity	3781	0.10961	1	0.96326	1	3	3	0	0
F-actin capping activity	3782	1	1	1	1	1	0	0	0
actin modulating activity	3790	0.64198	1	0.36579	1	3	3	0	0
defense/immunity protein activity	3793	0.97203	0.95356	0.00703	0.04755	53	53	9	5
acute-phase response protein activity	3794	1	1	1	1	1	0	0	0
antimicrobial peptide activity	3795	0.84856	0.43931	0.35555	0.23	10	10	20	2
lysozyme activity	3796	0.9703	1	0.10306	1	8	8	0	0
antibacterial peptide activity	3797	0.7867	0.52868	0.5725	1	13	13	8	1
antifungal peptide activity	3799	0.93496	1	0.3789	0.18867	8	8	13	1
antiviral response protein activity	3800	0.5215	0.12339	0.19523	0.00221	22	22	32	7
blood coagulation factor activity	3801	0.07238	0.0407	0.99977	1	6	6	33	2
coagulation factor VIIa activity	3802	1	1	1	1	1	0	0	0
coagulation factor IXa activity	3803	0.98065	1	0.06107	1	2	2	0	0
coagulation factor Xa activity	3804	1	1	1	1	1	0	0	0
coagulation factor XIa activity	3805	0.97278	1	0.04254	1	3	3	0	0
coagulation factor XIIa activity	3806	1	1	1	1	1	0	0	0
plasma kallikrein activity	3807	1	1	1	1	1	0	0	0
thrombin activity	3809	0.3217	0.10926	0.55924	1	2	2	50	1
protein-glutamine gamma-glutamyltransferase activity	3810	0.19352	0.29328	0.5751	1	6	6	17	1
complement activity	3811	0.56884	0.10526	0.42916	0.23	10	10	30	3
alternative-complement-pathway C3/C5 convertase activity	3812	0.30916	0.10926	0.65815	1	2	2	50	1
complement component C1s activity	3816	1	1	1	1	1	0	0	0
complement factor D activity	3817	1	1	1	0.02579	1	0	100	1
complement factor I activity	3818	1	0.05621	1	1	1	0	100	1
class I major histocompatibility complex antigen	3820	1	1	1	1	1	0	0	0
class II major histocompatibility complex antigen	3821	1	1	1	1	1	0	0	0
MHC-interacting protein	3822	0.46376	1	0.52835	1	7	7	0	0
antigen binding	3823	0.97943	1	0.04149	0.32436	15	15	7	1
catalytic activity	3824	0.02595	0.01758	0.66191	0.00973	2363	2113	10	235
alpha-ketoacid dehydrogenase activity	3826	1	1	1	1	1	0	0	0
alpha-N-acetylneuraminate alpha-2\,8-sialyltransferase activity	3828	1	1	1	1	1	0	0	0
beta-1\,4-mannosylglycoprotein 4-beta-N-acetylglucosaminyltransferase activity	3830	1	1	1	1	1	0	0	0
beta-N-acetylglucosaminylglycopeptide beta-1\,4-galactosyltransferase activity	3831	1	1	1	1	1	0	0	0
beta-carotene 15\,15'-monooxygenase activity	3834	1	1	1	1	1	0	0	0
beta-galactoside alpha-2\,6-sialyltransferase activity	3835	1	1	1	1	1	0	0	0
gamma-glutamyltransferase activity	3840	0.78175	0.25119	0.49327	1	5	5	20	1
1-acylglycerol-3-phosphate O-acyltransferase activity	3841	1	1	1	1	1	0	0	0
11-beta-hydroxysteroid dehydrogenase activity	3845	1	1	1	0.02579	1	0	100	1
1-alkyl-2-acetylglycerophosphocholine esterase activity	3847	1	1	1	1	1	0	0	0
3-beta-hydroxy-delta5-steroid dehydrogenase activity	3854	0.34869	0.0407	0.13387	0.0093	6	6	67	4
3-hydroxyacyl-CoA dehydrogenase activity	3857	1	1	1	1	1	0	0	0
3-hydroxyisobutyryl-CoA hydrolase activity	3860	1	1	1	1	1	0	0	0
3-methyl-2-oxobutanoate dehydrogenase (2-methylpropanoyl-transferring) activity	3863	1	1	1	1	1	0	0	0
3-oxo-5-alpha-steroid 4-dehydrogenase activity	3865	1	1	1	1	1	0	0	0
4-hydroxyphenylpyruvate dioxygenase activity	3868	1	1	1	1	1	0	0	0
4-nitrophenylphosphatase activity	3869	1	1	1	1	1	0	0	0
5-aminolevulinate synthase activity	3870	1	1	1	1	1	0	0	0
6-phosphofructokinase activity	3872	1	1	1	1	1	0	0	0
6-phosphofructo-2-kinase activity	3873	0.7049	1	0.44357	1	3	3	0	0
ADP-ribosylarginine hydrolase activity	3875	1	1	1	1	1	0	0	0
AMP deaminase activity	3876	0.52748	1	0.305	0.05092	2	2	50	1
ATP citrate synthase activity	3878	1	1	1	1	1	0	0	0
CDP-diacylglycerol-inositol 3-phosphatidyltransferase activity	3881	1	1	1	1	1	0	0	0
D-amino-acid oxidase activity	3884	1	1	1	1	1	0	0	0
DNA (cytosine-5-)-methyltransferase activity	3886	0.00489	1	0.92771	1	3	3	0	0
DNA-directed DNA polymerase activity	3887	0.00287	0.24727	0.99074	1	17	17	12	2
alpha DNA polymerase activity	3889	1	1	1	1	1	0	0	0
delta DNA polymerase activity	3891	0.57405	1	0.29929	1	2	2	0	0
epsilon DNA polymerase activity	3893	0.03265	1	0.53611	1	5	5	0	0
zeta DNA polymerase activity	3894	1	1	1	1	1	0	0	0
DNA-directed RNA polymerase activity	3899	0.16921	0.72008	0.88352	1	22	22	5	1
deoxyribodipyrimidine photo-lyase activity	3904	1	1	1	1	1	0	0	0
DNA-(apurinic or apyrimidinic site) lyase activity	3906	0.19439	1	0.78072	1	3	3	0	0
methylated-DNA-[protein]-cysteine S-methyltransferase activity	3908	1	1	1	1	1	0	0	0
DNA ligase activity	3909	0.20391	1	0.32538	1	6	6	0	0
DNA ligase (ATP) activity	3910	0.20391	1	0.32538	1	6	6	0	0
DNA photolyase activity	3913	0.77618	1	0.44302	1	2	2	0	0
DNA topoisomerase activity	3916	0.02699	0.00912	0.99657	1	3	3	67	2
DNA topoisomerase type I activity	3917	1	1	1	1	1	0	0	0
DNA topoisomerase (ATP-hydrolyzing) activity	3918	0.00841	0.00316	0.99757	1	2	2	100	2
GMP reductase activity	3920	1	1	1	1	1	0	0	0
GPI-anchor transamidase activity	3923	1	1	1	1	1	0	0	0
GTPase activity	3924	0.33144	0.39398	0.44139	1	24	24	8	2
small monomeric GTPase activity	3925	0.80282	0.98268	0.09165	0.54229	70	70	4	3
ARF small monomeric GTPase activity	3926	0.97061	1	0.28185	1	2	2	0	0
heterotrimeric G-protein GTPase activity	3927	0.40114	0.60382	0.81141	1	16	16	6	1
RAB small monomeric GTPase activity	3928	0.89044	1	0.0376	0.5669	32	32	3	1
RAN small monomeric GTPase activity	3929	1	0.05621	1	1	1	0	100	1
RAS small monomeric GTPase activity	3930	0.73731	1	0.45956	1	16	16	0	0
Rho small monomeric GTPase activity	3931	0.61696	1	0.17064	1	17	17	0	0
GTP cyclohydrolase activity	3933	1	1	1	1	1	0	0	0
GTP cyclohydrolase I activity	3934	1	1	1	1	1	0	0	0
hydrogen-transporting two-sector ATPase activity	3936	0.43675	1	0.47005	0.14513	6	6	17	1
IMP cyclohydrolase activity	3937	1	1	1	1	1	0	0	0
L-iditol 2-dehydrogenase activity	3939	1	1	1	1	1	0	0	0
L-iduronidase activity	3940	1	1	1	1	1	0	0	0
N-acetylgalactosamine-4-sulfatase activity	3943	1	1	1	1	1	0	0	0
N-acetylglucosamine-1-phosphodiester alpha-N-acetylglucosaminidase activity	3944	1	1	1	1	1	0	0	0
N-acetyllactosamine synthase activity	3945	0.58631	1	0.79908	1	2	2	0	0
(N-acetylneuraminyl)-galactosylglucosylceramide N-acetylgalactosaminyltransferase activity	3947	1	1	1	1	1	0	0	0
N4-(beta-N-acetylglucosaminyl)-L-asparaginase activity	3948	1	1	1	1	1	0	0	0
NAD+ ADP-ribosyltransferase activity	3950	0.60439	1	0.67343	1	7	7	0	0
NAD+ nucleosidase activity	3953	1	1	1	1	1	0	0	0
NADH dehydrogenase activity	3954	0.22988	1	0.53741	1	19	19	0	0
NAD(P)H dehydrogenase (quinone) activity	3955	1	1	1	1	1	0	0	0
NAD(P)+-protein-arginine ADP-ribosyltransferase activity	3956	0.93896	1	0.07772	1	3	3	0	0
NADPH-hemoprotein reductase activity	3958	1	1	1	1	1	0	0	0
NADPH\:quinone reductase activity	3960	0.25767	1	0.81888	1	2	2	0	0
RNA-3'-phosphate cyclase activity	3963	1	1	1	1	1	0	0	0
RNA-directed DNA polymerase activity	3964	0.45556	1	0.90985	1	2	2	0	0
RNA editase activity	3969	1	1	1	1	1	0	0	0
(S)-2-hydroxy-acid oxidase activity	3973	1	1	1	1	1	0	0	0
UDP-glucose 4-epimerase activity	3978	1	1	1	1	1	0	0	0
UDP-glucose 6-dehydrogenase activity	3979	1	1	1	1	1	0	0	0
acetyl-CoA hydrolase activity	3986	1	1	1	1	1	0	0	0
acetyl-CoA C-acyltransferase activity	3988	1	1	1	1	1	0	0	0
acetyl-CoA carboxylase activity	3989	1	1	1	0.02579	1	0	100	1
acetylcholinesterase activity	3990	1	1	1	1	1	0	0	0
acid phosphatase activity	3993	0.13154	1	0.92348	1	7	7	0	0
acyl-CoA dehydrogenase activity	3995	0.93804	1	0.33911	1	3	3	0	0
acyl-CoA ligase activity	3996	1	1	1	1	1	0	0	0
acylphosphatase activity	3998	0.58564	1	0.88755	1	3	3	0	0
adenine phosphoribosyltransferase activity	3999	1	1	1	1	1	0	0	0
adenosine deaminase activity	4000	0.57066	1	0.82474	1	3	3	0	0
ATP-dependent DNA helicase activity	4003	0.12209	0.25119	0.97335	1	5	5	20	1
ATP-dependent RNA helicase activity	4004	0.35074	1	0.79323	1	11	11	0	0
plasma membrane cation-transporting ATPase	4005	1	1	1	1	1	0	0	0
ATP-binding cassette (ABC) transporter activity	4009	0.98787	0.94144	0.17767	0.36163	49	49	6	3
phospholipid-translocating ATPase activity	4012	0.18578	1	0.32299	1	4	4	0	0
adenosylhomocysteinase activity	4013	1	1	1	1	1	0	0	0
adenosylmethionine decarboxylase activity	4014	1	1	1	1	1	0	0	0
adenylate cyclase activity	4016	0.4511	1	0.57383	1	2	2	0	0
adenylate kinase activity	4017	1	1	1	1	1	0	0	0
adenylosuccinate lyase activity	4018	1	1	1	1	1	0	0	0
adenylosuccinate synthase activity	4019	0.88859	1	0.66085	1	3	3	0	0
alanine transaminase activity	4021	0.98919	1	0.29264	0.05092	2	2	50	1
alcohol dehydrogenase activity	4022	0.60948	1	0.49596	0.01404	20	20	15	3
alcohol dehydrogenase activity\, zinc-dependent	4024	0.69817	1	0.66857	0.05587	15	15	13	2
3-chloroallyl aldehyde dehydrogenase activity	4028	0.55602	0.25119	0.77929	1	5	5	20	1
aldehyde dehydrogenase (NAD) activity	4029	0.55602	0.25119	0.77929	1	5	5	20	1
aldehyde dehydrogenase [NAD(P)+] activity	4030	1	1	1	1	1	0	0	0
aldehyde oxidase activity	4031	1	1	1	1	1	0	0	0
aldehyde reductase activity	4032	1	1	1	1	1	0	0	0
aldo-keto reductase activity	4033	0.90201	1	0.21516	0.12249	5	5	20	1
alkaline phosphatase activity	4035	0.59928	1	0.1625	1	3	3	0	0
amidase activity	4040	1	1	1	1	1	0	0	0
amino-acid N-acetyltransferase activity	4042	1	1	1	1	1	0	0	0
aminoacylase activity	4046	1	1	1	1	1	0	0	0
aminomethyltransferase activity	4047	0.92337	1	0.02191	1	2	2	0	0
apyrase activity	4050	1	1	1	1	1	0	0	0
arachidonate 5-lipoxygenase activity	4051	1	1	1	1	1	0	0	0
arachidonate 12-lipoxygenase activity	4052	1	1	1	1	1	0	0	0
arginase activity	4053	0.47784	1	0.53184	1	2	2	0	0
argininosuccinate lyase activity	4056	1	1	1	1	1	0	0	0
aralkylamine N-acetyltransferase activity	4059	1	1	1	1	1	0	0	0
arylamine N-acetyltransferase activity	4060	0.92549	1	0.06257	1	2	2	0	0
aryl sulfotransferase activity	4062	0.97276	1	0.06089	1	7	7	0	0
aryldialkylphosphatase activity	4063	1	1	1	1	1	0	0	0
arylesterase activity	4064	1	1	1	1	1	0	0	0
arylsulfatase activity	4065	0.32446	0.0407	0.70691	1	6	6	33	2
asparaginase activity	4067	1	1	1	1	1	0	0	0
aspartate carbamoyltransferase activity	4070	1	1	1	1	1	0	0	0
biotin carboxylase activity	4075	0.60262	1	0.49492	0.0754	3	3	33	1
biotin-[acetyl-CoA-carboxylase] ligase activity	4077	1	0.05621	1	1	1	0	100	1
biotin-[methylcrotonoyl-CoA-carboxylase] ligase activity	4078	1	0.05621	1	1	1	0	100	1
biotin-[methylmalonyl-CoA-carboxytransferase] ligase activity	4079	1	0.05621	1	1	1	0	100	1
biotin-[propionyl-CoA-carboxylase (ATP-hydrolyzing)] ligase activity	4080	1	0.05621	1	1	1	0	100	1
bisphosphoglycerate mutase activity	4082	1	1	1	1	1	0	0	0
bisphosphoglycerate phosphatase activity	4083	0.37745	1	0.60086	1	2	2	0	0
branched-chain-amino-acid transaminase activity	4084	0.33053	0.10926	0.86347	1	2	2	50	1
carbamoyl-phosphate synthase activity	4086	1	1	1	1	1	0	0	0
carbamoyl-phosphate synthase (glutamine-hydrolyzing) activity	4088	1	1	1	1	1	0	0	0
carbonate dehydratase activity	4089	0.86096	0.43931	0.03349	8e-05	10	10	50	5
carbonyl reductase (NADPH) activity	4090	0.88863	1	0.19934	1	2	2	0	0
carboxylesterase activity	4091	0.82647	1	0.06219	1	7	7	0	0
carnitine O-acetyltransferase activity	4092	1	1	1	1	1	0	0	0
carnitine O-palmitoyltransferase activity	4095	1	1	1	1	1	0	0	0
cerebroside-sulfatase activity	4098	1	1	1	1	1	0	0	0
choline kinase activity	4103	1	1	1	1	1	0	0	0
cholinesterase activity	4104	1	1	1	1	1	0	0	0
choline-phosphate cytidylyltransferase activity	4105	0.70699	1	0.25103	1	2	2	0	0
citrate (Si)-synthase activity	4108	0.22436	1	0.67148	1	2	2	0	0
coproporphyrinogen oxidase activity	4109	1	1	1	1	1	0	0	0
creatine kinase activity	4111	0.45108	0.15932	0.37874	1	3	3	33	1
cyclic-nucleotide phosphodiesterase activity	4112	0.95726	1	0.00836	1	10	10	0	0
3'\,5'-cyclic-nucleotide phosphodiesterase activity	4114	0.95726	1	0.00836	1	10	10	0	0
cAMP-specific phosphodiesterase activity	4115	0.94558	1	0.13384	1	2	2	0	0
cGMP-specific phosphodiesterase activity	4116	0.78355	1	0.21184	1	5	5	0	0
calmodulin-dependent cyclic-nucleotide phosphodiesterase activity	4117	1	1	1	1	1	0	0	0
cGMP-inhibited cyclic-nucleotide phosphodiesterase activity	4119	1	1	1	1	1	0	0	0
cystathionine gamma-lyase activity	4123	1	1	1	1	1	0	0	0
cytidine deaminase activity	4126	0.78477	1	0.46011	1	3	3	0	0
cytidylate kinase activity	4127	1	1	1	1	1	0	0	0
cytochrome-b5 reductase activity	4128	0.01978	0.20658	0.9817	1	4	4	25	1
cytochrome-c oxidase activity	4129	0.72863	1	0.09707	1	12	12	0	0
glycogen debranching enzyme activity	4133	1	1	1	1	1	0	0	0
4-alpha-glucanotransferase activity	4134	1	1	1	1	1	0	0	0
amylo-alpha-1\,6-glucosidase activity	4135	1	1	1	1	1	0	0	0
deoxycytidine kinase activity	4137	1	1	1	1	1	0	0	0
dephospho-CoA kinase activity	4140	1	1	1	1	1	0	0	0
diacylglycerol kinase activity	4143	0.34209	0.10926	0.95071	1	2	2	50	1
diacylglycerol O-acyltransferase activity	4144	1	1	1	1	1	0	0	0
diamine N-acetyltransferase activity	4145	1	1	1	1	1	0	0	0
dihydrofolate reductase activity	4146	0.33679	1	0.38058	1	2	2	0	0
dihydrolipoyllysine-residue succinyltransferase activity	4149	1	1	1	1	1	0	0	0
dihydroorotase activity	4151	1	1	1	1	1	0	0	0
dihydroorotate dehydrogenase activity	4152	1	1	1	1	1	0	0	0
6\,7-dihydropteridine reductase activity	4155	1	1	1	1	1	0	0	0
dihydropyrimidinase activity	4157	0.37875	1	0.55711	1	2	2	0	0
dihydroorotate oxidase activity	4158	1	1	1	1	1	0	0	0
dimethylallyltranstransferase activity	4161	0.08936	1	0.78941	1	2	2	0	0
diphosphomevalonate decarboxylase activity	4163	1	1	1	1	1	0	0	0
dodecenoyl-CoA delta-isomerase activity	4165	0.957	1	0.40229	1	2	2	0	0
dopachrome isomerase activity	4167	0.2053	1	0.85384	1	2	2	0	0
dolichyl-phosphate-mannose-protein mannosyltransferase activity	4169	1	1	1	1	1	0	0	0
dUTP diphosphatase activity	4170	1	1	1	1	1	0	0	0
deoxyhypusine synthase activity	4171	1	1	1	1	1	0	0	0
electron-transferring-flavoprotein dehydrogenase activity	4174	0.35896	1	0.42296	1	3	3	0	0
endopeptidase activity	4175	0.18153	0.00143	0.16381	0.44576	245	242	13	33
ATP-dependent peptidase activity	4176	0.29673	1	0.70297	1	6	6	0	0
aminopeptidase activity	4177	0.79722	1	0.42109	0.02605	10	10	20	2
membrane alanyl aminopeptidase activity	4179	0.93013	1	0.15959	0.00631	5	5	40	2
carboxypeptidase activity	4180	0.75939	0.39398	0.07914	0.12643	24	24	17	4
metallocarboxypeptidase activity	4181	0.47827	0.24727	0.61617	1	17	17	12	2
carboxypeptidase A activity	4182	0.47827	0.24727	0.61617	1	17	17	12	2
carboxypeptidase E activity	4183	1	1	1	1	1	0	0	0
lysine carboxypeptidase activity	4184	1	1	1	1	1	0	0	0
serine carboxypeptidase activity	4185	0.84475	1	0.30263	0.05092	2	2	50	1
aspartic-type endopeptidase activity	4190	0.92609	1	0.32947	1	10	10	0	0
pepsin A activity	4194	0.96697	1	0.04261	1	5	5	0	0
renin activity	4195	1	1	1	1	1	0	0	0
cysteine-type endopeptidase activity	4197	0.01568	0.96525	0.70243	0.78076	58	58	3	2
calpain activity	4198	0.56234	1	0.37896	1	6	6	0	0
lysosomal cysteine-type endopeptidase	4212	0.75891	1	0.56706	1	2	2	0	0
dipeptidyl-peptidase I activity	4214	1	1	1	1	1	0	0	0
cathepsin L activity	4217	0.08369	1	0.97112	1	2	2	0	0
cathepsin S activity	4218	1	1	1	1	1	0	0	0
pyroglutamyl-peptidase I activity	4219	0.29148	1	0.6897	1	2	2	0	0
ubiquitin thiolesterase activity	4221	0.02346	1	0.74595	1	28	28	0	0
metalloendopeptidase activity	4222	0.05733	0.00015	0.1876	0.39854	53	53	25	13
glutamyl aminopeptidase activity	4230	1	1	1	0.02579	1	0	100	1
interstitial collagenase activity	4232	1	0.05621	1	1	1	0	100	1
macrophage elastase activity	4234	0.28363	0.10926	0.59012	1	2	2	50	1
matrilysin activity	4235	1	0.05621	1	1	1	0	100	1
membrane dipeptidase activity	4237	0.28481	0.10926	0.6273	1	2	2	50	1
meprin A activity	4238	1	1	0.006	0.00066	2	2	100	2
mitochondrial processing peptidase activity	4240	1	1	1	1	1	0	0	0
neprilysin activity	4245	0.98657	1	0.02526	1	2	2	0	0
peptidyl-dipeptidase A activity	4246	0.99298	1	0.01099	1	2	2	0	0
stromelysin 1 activity	4248	1	0.05621	1	1	1	0	100	1
stromelysin 3 activity	4249	1	0.05621	1	1	1	0	100	1
aminopeptidase I activity	4250	1	1	1	1	1	0	0	0
serine-type endopeptidase activity	4252	0.3336	0.0044	0.00013	0.33331	113	112	16	18
cathepsin G activity	4261	1	1	1	1	1	0	0	0
chymotrypsin activity	4263	0.10412	0.00029	0.00077	0.31238	76	76	21	16
enteropeptidase activity	4275	1	1	1	0.02579	1	0	100	1
granzyme A activity	4277	1	1	1	1	1	0	0	0
granzyme B activity	4278	1	1	1	1	1	0	0	0
pancreatic elastase II activity	4281	1	1	1	1	1	0	0	0
plasmin activity	4283	0.3217	0.10926	0.44642	1	2	2	50	1
proprotein convertase 1 activity	4285	1	1	1	1	1	0	0	0
proprotein convertase 2 activity	4286	1	1	1	1	1	0	0	0
subtilase activity	4289	0.99142	1	0.04854	0.3418	16	16	6	1
tissue kallikrein activity	4293	0.44279	0.15932	0.2582	1	3	3	33	1
tripeptidyl-peptidase II activity	4294	1	1	1	1	1	0	0	0
trypsin activity	4295	0.15488	0.00079	0.00058	0.36896	84	84	19	16
proteasome endopeptidase activity	4299	0.37487	1	0.40324	1	5	5	0	0
enoyl-CoA hydratase activity	4300	0.9639	1	0.17503	1	2	2	0	0
epoxide hydrolase activity	4301	0.73709	1	0.61604	1	4	4	0	0
estradiol 17-beta-dehydrogenase activity	4303	0.89618	1	0.39974	1	2	2	0	0
ethanolaminephosphotransferase activity	4307	1	1	1	1	1	0	0	0
exo-alpha-sialidase activity	4308	0.75457	1	0.38919	0.16719	7	7	14	1
farnesyltranstransferase activity	4311	1	1	1	1	1	0	0	0
fatty-acid synthase activity	4312	0.69168	1	0.4495	1	2	2	0	0
[acyl-carrier protein] S-acetyltransferase activity	4313	1	1	1	1	1	0	0	0
[acyl-carrier protein] S-malonyltransferase activity	4314	1	1	1	1	1	0	0	0
3-oxoacyl-[acyl-carrier protein] synthase activity	4315	1	1	1	1	1	0	0	0
3-oxoacyl-[acyl-carrier protein] reductase activity	4316	1	1	1	1	1	0	0	0
3-hydroxypalmitoyl-[acyl-carrier protein] dehydratase activity	4317	1	1	1	1	1	0	0	0
enoyl-[acyl-carrier protein] reductase (NADPH\, B-specific) activity	4319	1	1	1	1	1	0	0	0
oleoyl-[acyl-carrier protein] hydrolase activity	4320	1	1	1	1	1	0	0	0
ferredoxin-NADP+ reductase activity	4324	1	1	1	1	1	0	0	0
formaldehyde dehydrogenase (glutathione) activity	4327	1	1	1	1	1	0	0	0
formate-tetrahydrofolate ligase activity	4329	1	1	1	1	1	0	0	0
fructose-2\,6-bisphosphate 2-phosphatase activity	4331	0.63708	1	0.3839	1	4	4	0	0
fructose-bisphosphate aldolase activity	4332	0.50363	1	0.71949	1	2	2	0	0
fumarylacetoacetase activity	4334	1	1	1	1	1	0	0	0
galactokinase activity	4335	1	1	1	1	1	0	0	0
geranyltranstransferase activity	4337	0.08936	1	0.78941	1	2	2	0	0
glucan 1\,4-alpha-glucosidase activity	4339	0.27877	1	0.44269	0.0754	3	3	33	1
glucokinase activity	4340	1	1	1	1	1	0	0	0
glucosamine-6-phosphate deaminase activity	4342	1	1	1	1	1	0	0	0
glucose-6-phosphatase activity	4346	0.67806	1	0.69399	1	2	2	0	0
glutamate decarboxylase activity	4351	0.79784	1	0.13544	1	2	2	0	0
glutamate-ammonia ligase activity	4356	1	1	1	1	1	0	0	0
glutamate-cysteine ligase activity	4357	1	1	1	1	1	0	0	0
glutaminase activity	4359	0.56321	1	0.22673	1	2	2	0	0
glutamine-fructose-6-phosphate transaminase (isomerizing) activity	4360	1	1	1	1	1	0	0	0
glutathione synthase activity	4363	1	1	1	1	1	0	0	0
glutathione transferase activity	4364	0.99107	1	0.01213	0.37534	18	18	6	1
glyceraldehyde-3-phosphate dehydrogenase (phosphorylating) activity	4365	1	1	1	1	1	0	0	0
glycerol-3-phosphate O-acyltransferase activity	4366	1	1	1	1	1	0	0	0
glycerol-3-phosphate dehydrogenase (NAD+) activity	4367	1	1	1	1	1	0	0	0
glycerol kinase activity	4370	0.5405	1	0.4147	1	2	2	0	0
glycerone kinase activity	4371	1	1	1	1	1	0	0	0
glycine hydroxymethyltransferase activity	4372	0.08119	0.15932	0.81766	1	3	3	33	1
glycogen (starch) synthase activity	4373	0.62252	1	0.2405	1	2	2	0	0
glycine dehydrogenase (decarboxylating) activity	4375	1	1	1	1	1	0	0	0
glycylpeptide N-tetradecanoyltransferase activity	4379	1	1	1	1	1	0	0	0
guanylate cyclase activity	4383	0.66396	1	0.07032	1	6	6	0	0
membrane-associated guanylate kinase	4384	1	1	1	1	1	0	0	0
guanylate kinase activity	4385	0.48046	1	0.81005	1	6	6	0	0
helicase activity	4386	0.11532	0.6847	0.57694	0.02175	62	62	13	8
heme oxygenase (decyclizing) activity	4392	1	1	1	1	1	0	0	0
hexaprenyldihydroxybenzoate methyltransferase activity	4395	1	1	1	1	1	0	0	0
hexokinase activity	4396	0.96484	1	0.06018	1	4	4	0	0
histidine ammonia-lyase activity	4397	1	1	1	1	1	0	0	0
histidine decarboxylase activity	4398	1	1	1	1	1	0	0	0
histone acetyltransferase activity	4402	0.11134	1	0.85418	1	4	4	0	0
H3/H4 histone acetyltransferase activity	4406	0.08024	1	0.91708	1	2	2	0	0
histone deacetylase activity	4407	0.08306	1	0.94375	1	6	6	0	0
holocytochrome-c synthase activity	4408	1	1	1	1	1	0	0	0
homoaconitate hydratase activity	4409	0.19233	1	0.85474	1	2	2	0	0
hyalurononglucosaminidase activity	4415	0.22867	1	0.60041	1	4	4	0	0
hydroxyacylglutathione hydrolase activity	4416	1	1	1	1	1	0	0	0
hydroxymethylbilane synthase activity	4418	1	1	1	1	1	0	0	0
hydroxymethylglutaryl-CoA reductase (NADPH) activity	4420	1	1	1	1	1	0	0	0
hydroxymethylglutaryl-CoA synthase activity	4421	0.9451	1	0.35349	1	2	2	0	0
hypoxanthine phosphoribosyltransferase activity	4422	1	1	1	1	1	0	0	0
indoleamine-pyrrole 2\,3-dioxygenase activity	4426	1	0.05621	1	1	1	0	100	1
inositol or phosphatidylinositol kinase activity	4428	0.76797	1	0.24299	1	15	15	0	0
1-phosphatidylinositol 4-kinase activity	4430	1	1	1	1	1	0	0	0
inositol or phosphatidylinositol phosphodiesterase activity	4434	0.96816	1	0.18917	1	11	11	0	0
phosphoinositide phospholipase C activity	4435	0.96816	1	0.18917	1	11	11	0	0
inositol or phosphatidylinositol phosphatase activity	4437	0.19238	1	0.82799	1	8	8	0	0
phosphoinositide 5-phosphatase activity	4439	0.27877	1	0.94646	1	4	4	0	0
inositol-1\,4-bisphosphate 1-phosphatase activity	4441	1	1	1	1	1	0	0	0
inositol-polyphosphate 5-phosphatase activity	4445	0.43712	1	0.90242	1	5	5	0	0
isocitrate dehydrogenase activity	4448	0.63404	1	0.47225	1	4	4	0	0
isocitrate dehydrogenase (NAD+) activity	4449	0.87289	1	0.28571	1	3	3	0	0
isocitrate dehydrogenase (NADP+) activity	4450	1	1	1	1	1	0	0	0
isopentenyl-diphosphate delta-isomerase activity	4452	0.09902	1	0.9698	1	3	3	0	0
lactate dehydrogenase activity	4457	0.77409	1	0.28625	1	5	5	0	0
L-lactate dehydrogenase activity	4459	0.77409	1	0.28625	1	5	5	0	0
lactose synthase activity	4461	1	1	1	1	1	0	0	0
lactoylglutathione lyase activity	4462	0.05859	0.00912	0.99971	1	3	3	67	2
leukotriene-A4 hydrolase activity	4463	0.73709	1	0.61604	1	4	4	0	0
leukotriene-C4 synthase activity	4464	1	1	1	1	1	0	0	0
lipoprotein lipase activity	4465	0.38193	1	0.24466	1	5	5	0	0
long-chain-acyl-CoA dehydrogenase activity	4466	1	1	1	1	1	0	0	0
long-chain-fatty-acid-CoA ligase activity	4467	0.17637	0.20658	0.99593	1	4	4	25	1
lysine N-acetyltransferase activity	4468	0.11134	1	0.85418	1	4	4	0	0
mannose-6-phosphate isomerase activity	4476	1	1	1	1	1	0	0	0
methenyltetrahydrofolate cyclohydrolase activity	4477	1	1	1	1	1	0	0	0
mRNA (guanine-N7-)-methyltransferase activity	4482	1	1	1	1	1	0	0	0
methylcrotonoyl-CoA carboxylase activity	4485	0.11834	1	0.97442	1	2	2	0	0
methylenetetrahydrofolate dehydrogenase activity	4486	1	1	1	1	1	0	0	0
methylenetetrahydrofolate dehydrogenase (NADP+) activity	4488	1	1	1	1	1	0	0	0
methylenetetrahydrofolate reductase (NADPH) activity	4489	1	1	1	1	1	0	0	0
methylmalonate-semialdehyde dehydrogenase (acylating) activity	4491	1	1	1	1	1	0	0	0
monooxygenase activity	4497	0.22619	0.00373	0.1431	0.31946	77	77	18	14
dimethylaniline monooxygenase (N-oxide-forming) activity	4499	1	1	1	1	1	0	0	0
dopamine beta-monooxygenase activity	4500	0.71087	1	0.48777	1	3	3	0	0
kynurenine 3-monooxygenase activity	4502	1	1	1	1	1	0	0	0
phenylalanine 4-monooxygenase activity	4505	1	0.05621	1	1	1	0	100	1
squalene monooxygenase activity	4506	1	0.05621	1	1	1	0	100	1
steroid 11-beta-monooxygenase activity	4507	0.86824	1	0.53587	1	2	2	0	0
steroid 17-alpha-monooxygenase activity	4508	1	1	1	1	1	0	0	0
steroid 21-monooxygenase activity	4509	1	1	1	1	1	0	0	0
tryptophan 5-monooxygenase activity	4510	0.97837	1	0.04153	1	2	2	0	0
tyrosine 3-monooxygenase activity	4511	1	1	1	1	1	0	0	0
inositol-3-phosphate synthase activity	4512	1	1	1	1	1	0	0	0
nitric-oxide synthase activity	4517	1	1	1	1	1	0	0	0
nuclease activity	4518	0.04885	0.78549	0.77313	1	73	73	4	3
endonuclease activity	4519	0.18675	0.74977	0.76245	1	47	47	4	2
endodeoxyribonuclease activity	4520	0.06244	1	0.8249	1	6	6	0	0
endoribonuclease activity	4521	0.21675	0.39398	0.51851	1	24	24	8	2
pancreatic ribonuclease activity	4522	0.76556	1	0.02653	1	6	6	0	0
ribonuclease H activity	4523	0.52189	1	0.19484	1	4	4	0	0
ribonuclease III activity	4525	0.41811	1	0.68052	1	3	3	0	0
ribonuclease P activity	4526	0.03622	0.07051	0.97005	1	8	8	25	2
exonuclease activity	4527	0.0597	0.75069	0.90323	1	24	24	4	1
exodeoxyribonuclease activity	4529	0.16557	1	0.97659	1	2	2	0	0
deoxyribonuclease II activity	4531	0.34846	1	0.92945	1	2	2	0	0
exoribonuclease activity	4532	0.16473	0.29328	0.86306	1	6	6	17	1
deoxyribonuclease activity	4536	0.00496	1	0.88759	1	12	12	0	0
caspase-activated deoxyribonuclease activity	4537	0.09315	1	0.92139	1	2	2	0	0
ribonuclease activity	4540	0.27513	0.23655	0.60887	1	30	30	10	3
nucleoside diphosphate kinase activity	4550	0.03358	0.02817	0.99995	1	5	5	40	2
hydrolase activity\, hydrolyzing O-glycosyl compounds	4553	0.75397	1	0.28187	0.1564	53	53	6	3
alpha\,alpha-trehalase activity	4555	0.99425	1	0.06456	1	3	3	0	0
alpha-galactosidase activity	4557	1	1	1	1	1	0	0	0
alpha-glucosidase activity	4558	0.86677	1	0.27289	0.05092	2	2	50	1
alpha-mannosidase activity	4559	0.62445	1	0.49176	1	2	2	0	0
alpha-L-fucosidase activity	4560	1	1	1	1	1	0	0	0
alpha-N-acetylglucosaminidase activity	4561	1	1	1	1	1	0	0	0
beta-N-acetylhexosaminidase activity	4563	1	1	1	1	1	0	0	0
beta-galactosidase activity	4565	0.31259	1	0.37322	1	6	6	0	0
beta-glucuronidase activity	4566	0.25884	1	0.80685	1	2	2	0	0
chitinase activity	4568	0.7842	1	0.31188	1	3	3	0	0
mannosyl-oligosaccharide 1\,2-alpha-mannosidase activity	4571	0.06013	1	0.83784	1	2	2	0	0
mannosyl-oligosaccharide 1\,3-1\,6-alpha-mannosidase activity	4572	1	1	1	1	1	0	0	0
oligo-1\,6-glucosidase activity	4574	1	1	1	0.02579	1	0	100	1
sucrose alpha-glucosidase activity	4575	1	1	1	0.02579	1	0	100	1
oligosaccharyl transferase activity	4576	0.02142	1	0.94411	1	2	2	0	0
dolichyl-diphosphooligosaccharide-protein glycotransferase activity	4579	1	1	1	1	1	0	0	0
ornithine carbamoyltransferase activity	4585	1	1	1	1	1	0	0	0
orotate phosphoribosyltransferase activity	4588	1	1	1	1	1	0	0	0
orotidine-5'-phosphate decarboxylase activity	4590	1	1	1	1	1	0	0	0
oxoglutarate dehydrogenase (succinyl-transferring) activity	4591	1	1	1	1	1	0	0	0
pantothenate kinase activity	4594	0.95315	1	0.09236	1	2	2	0	0
pantetheine-phosphate adenylyltransferase activity	4595	1	1	1	1	1	0	0	0
peroxidase activity	4601	0.4237	0.81338	0.84011	0.53153	29	29	7	2
glutathione peroxidase activity	4602	0.73042	1	0.49878	1	8	8	0	0
phenylethanolamine N-methyltransferase activity	4603	1	1	1	1	1	0	0	0
phosphatidylcholine-sterol O-acyltransferase activity	4607	0.02982	0.04449	0.84974	1	35	35	14	5
phosphoenolpyruvate carboxykinase activity	4611	0.99868	1	0.02993	0.05092	2	2	50	1
phosphoenolpyruvate carboxykinase (GTP) activity	4613	0.99868	1	0.02993	0.05092	2	2	50	1
phosphoglucomutase activity	4614	0.85453	1	0.27101	1	2	2	0	0
phosphomannomutase activity	4615	0.40465	1	0.82948	1	2	2	0	0
phosphoglycerate kinase activity	4618	0.69052	1	0.40863	1	2	2	0	0
phosphoglycerate mutase activity	4619	0.37745	1	0.60086	1	2	2	0	0
phospholipase activity	4620	0.96068	1	0.0001	0.5996	35	35	3	1
glycosylphosphatidylinositol phospholipase D activity	4621	1	1	1	1	1	0	0	0
lysophospholipase activity	4622	0.63715	1	0.10474	1	2	2	0	0
phospholipase A2 activity	4623	0.98027	1	0.00013	0.35879	17	17	6	1
calcium-dependent cytosolic phospholipase A2 activity	4627	1	1	1	1	1	0	0	0
phospholipase C activity	4629	0.97196	1	0.09377	1	12	12	0	0
phospholipase D activity	4630	0.3753	1	0.74062	1	3	3	0	0
phosphomevalonate kinase activity	4631	1	1	1	1	1	0	0	0
phosphopyruvate hydratase activity	4634	0.71488	1	0.24185	1	2	2	0	0
phosphoribosylformylglycinamidine synthase activity	4642	1	1	1	1	1	0	0	0
phosphoribosylaminoimidazolecarboxamide formyltransferase activity	4643	1	1	1	1	1	0	0	0
phosphorylase activity	4645	0.94856	1	0.45676	0.0754	3	3	33	1
phosphoserine phosphatase activity	4647	1	0.05621	1	1	1	0	100	1
polynucleotide adenylyltransferase activity	4652	0.88585	1	0.16365	1	4	4	0	0
polypeptide N-acetylgalactosaminyltransferase activity	4653	0.79714	1	0.05087	1	2	2	0	0
porphobilinogen synthase activity	4655	1	1	1	1	1	0	0	0
propionyl-CoA carboxylase activity	4658	0.37539	1	0.27133	1	2	2	0	0
prenyltransferase activity	4659	0.04182	1	0.80428	1	12	12	0	0
protein geranylgeranyltransferase activity	4661	1	1	1	1	1	0	0	0
Rab-protein geranylgeranyltransferase activity	4663	1	1	1	1	1	0	0	0
prostaglandin-endoperoxide synthase activity	4666	1	1	1	1	1	0	0	0
prostaglandin-D synthase activity	4667	0.99795	1	0.15189	0.09925	4	4	25	1
protein-arginine deiminase activity	4668	0.46396	0.15932	0.47238	0.0754	3	3	67	2
protein kinase activity	4672	0.55321	0.09751	0.5667	0.29915	245	242	11	27
protein histidine kinase activity	4673	0.99915	1	0.02307	0.00631	5	5	40	2
protein serine/threonine kinase activity	4674	0.23544	0.03168	0.97606	0.64653	171	170	12	20
transmembrane receptor protein serine/threonine kinase activity	4675	0.93072	1	0.24901	1	4	4	0	0
DNA-dependent protein kinase activity	4677	1	1	1	1	1	0	0	0
AMP-activated protein kinase activity	4679	0.71954	1	0.47591	1	2	2	0	0
casein kinase activity	4680	0.0267	1	0.80201	1	5	5	0	0
casein kinase I activity	4681	0.17035	1	0.59805	1	2	2	0	0
protein kinase CK2 activity	4682	0.10049	1	0.86943	1	3	3	0	0
calmodulin regulated protein kinase activity	4683	0.03853	1	0.79858	1	11	11	0	0
calcium- and calmodulin-dependent protein kinase activity	4685	0.10752	1	0.91544	1	4	4	0	0
myosin light chain kinase activity	4687	1	1	1	1	1	0	0	0
phosphorylase kinase activity	4689	0.17665	1	0.7664	1	5	5	0	0
cyclic nucleotide-dependent protein kinase activity	4690	0.47157	1	0.14776	1	4	4	0	0
cAMP-dependent protein kinase activity	4691	0.47157	1	0.14776	1	4	4	0	0
cyclin-dependent protein kinase activity	4693	0.00367	0.08737	0.99876	1	9	9	22	2
protein kinase C activity	4697	0.79846	1	0.05108	1	2	2	0	0
diacylglycerol-activated phospholipid-dependent protein kinase C activity	4701	1	1	1	1	1	0	0	0
receptor signaling protein serine/threonine kinase activity	4702	0.8065	1	0.00487	1	18	18	0	0
G-protein coupled receptor kinase activity	4703	0.58803	1	0.43543	1	3	3	0	0
NF-kappaB-inducing kinase activity	4704	0.93255	1	0.4537	1	2	2	0	0
MAP kinase activity	4707	0.70822	1	0.00397	1	6	6	0	0
MAP kinase kinase activity	4708	0.02874	1	0.85201	1	3	3	0	0
MAP kinase kinase kinase activity	4709	0.55817	1	0.27062	1	4	4	0	0
ribosomal protein S6 kinase activity	4711	1	1	1	1	1	0	0	0
protein threonine/tyrosine kinase activity	4712	0.15298	1	0.57614	0.09925	4	4	25	1
protein-tyrosine kinase activity	4713	0.5565	0.25357	0.88218	0.93936	107	106	8	9
transmembrane receptor protein tyrosine kinase activity	4714	0.1083	0.22143	0.67883	0.53153	29	29	14	4
non-membrane spanning protein tyrosine kinase activity	4715	0.67571	1	0.39974	1	7	7	0	0
receptor signaling protein tyrosine kinase activity	4716	0.24125	1	0.92112	1	5	5	0	0
focal adhesion kinase activity	4717	1	1	1	1	1	0	0	0
Janus kinase activity	4718	0.35538	1	0.52796	1	2	2	0	0
protein-L-isoaspartate (D-aspartate) O-methyltransferase activity	4719	1	0.05621	1	1	1	0	100	1
protein-lysine 6-oxidase activity	4720	0.13325	1	0.95548	1	3	3	0	0
phosphoprotein phosphatase activity	4721	0.49938	0.55927	0.63732	1	70	70	6	4
protein serine/threonine phosphatase activity	4722	0.44617	0.64713	0.91157	1	18	18	6	1
calcium-dependent protein serine/threonine phosphatase activity	4723	1	1	1	1	1	0	0	0
protein tyrosine phosphatase activity	4725	0.05883	0.28282	0.54912	1	33	33	9	3
non-membrane spanning protein tyrosine phosphatase activity	4726	0.98986	1	0.01892	1	2	2	0	0
prenylated protein tyrosine phosphatase activity	4727	0.3401	0.05489	0.40928	1	7	7	29	2
pseudouridylate synthase activity	4730	0.03768	0.07051	0.99873	1	8	8	25	2
purine-nucleoside phosphorylase activity	4731	1	1	1	1	1	0	0	0
pyrroline-5-carboxylate reductase activity	4735	0.01703	1	0.66614	1	4	4	0	0
pyruvate carboxylase activity	4736	1	1	1	1	1	0	0	0
pyruvate dehydrogenase activity	4738	0.58447	1	0.347	1	2	2	0	0
pyruvate dehydrogenase (acetyl-transferring) activity	4739	0.58447	1	0.347	1	2	2	0	0
[pyruvate dehydrogenase (lipoamide)] kinase activity	4740	1	1	1	0.02579	1	0	100	1
[pyruvate dehydrogenase (lipoamide)] phosphatase activity	4741	0.01025	0.10926	0.99171	1	2	2	50	1
pyruvate kinase activity	4743	0.15677	1	0.69739	1	3	3	0	0
retinol dehydrogenase activity	4745	0.99828	1	0.03514	0.14513	6	6	17	1
ribokinase activity	4747	1	1	1	1	1	0	0	0
ribonucleoside-diphosphate reductase activity	4748	0.04197	0.10926	0.99336	1	2	2	50	1
ribose phosphate diphosphokinase activity	4749	0.00351	0.20658	0.99199	1	4	4	25	1
ribulose-phosphate 3-epimerase activity	4750	1	1	1	1	1	0	0	0
selenide\, water dikinase activity	4756	0.13253	1	0.94314	1	2	2	0	0
sepiapterin reductase activity	4757	1	1	1	1	1	0	0	0
serine C-palmitoyltransferase activity	4758	1	1	1	1	1	0	0	0
serine esterase activity	4759	0.82647	1	0.06219	1	7	7	0	0
serine-pyruvate transaminase activity	4760	1	1	1	1	1	0	0	0
spermidine synthase activity	4766	0.31058	1	0.66384	1	3	3	0	0
sphingomyelin phosphodiesterase activity	4767	1	1	1	1	1	0	0	0
stearoyl-CoA 9-desaturase activity	4768	1	1	1	1	1	0	0	0
steroid delta-isomerase activity	4769	0.99997	1	0.03563	0.05092	2	2	50	1
sterol O-acyltransferase activity	4772	1	1	1	1	1	0	0	0
succinate-CoA ligase activity	4774	1	1	1	1	1	0	0	0
succinate-CoA ligase (GDP-forming) activity	4776	1	1	1	1	1	0	0	0
sulfinoalanine decarboxylase activity	4782	1	1	1	1	1	0	0	0
superoxide dismutase activity	4784	0.06086	0.01152	0.7952	1	9	9	33	3
copper\, zinc superoxide dismutase activity	4785	0.18945	0.07051	0.6447	1	8	8	25	2
thioredoxin-disulfide reductase activity	4791	1	1	1	0.02579	1	0	100	1
thiosulfate sulfurtransferase activity	4792	1	1	1	1	1	0	0	0
thyroxine 5'-deiodinase activity	4800	0.95511	1	0.40044	1	2	2	0	0
transaldolase activity	4801	1	1	1	1	1	0	0	0
transketolase activity	4802	0.83796	1	0.71756	1	4	4	0	0
transposase activity	4803	1	1	1	1	1	0	0	0
triacylglycerol lipase activity	4806	0.66931	1	0.10729	1	3	3	0	0
tRNA (5-methylaminomethyl-2-thiouridylate)-methyltransferase activity	4808	1	1	1	1	1	0	0	0
tRNA (guanine-N2-)-methyltransferase activity	4809	1	1	1	1	1	0	0	0
tRNA adenylyltransferase activity	4810	1	1	1	1	1	0	0	0
tRNA isopentenyltransferase activity	4811	1	1	1	1	1	0	0	0
tRNA ligase activity	4812	0.00297	0.45288	0.96742	0.68365	44	44	9	4
alanine-tRNA ligase activity	4813	0.27836	1	0.87651	1	2	2	0	0
arginine-tRNA ligase activity	4814	1	1	1	1	1	0	0	0
aspartate-tRNA ligase activity	4815	1	1	1	1	1	0	0	0
glutamate-tRNA ligase activity	4818	1	1	1	1	1	0	0	0
glutamine-tRNA ligase activity	4819	1	1	1	1	1	0	0	0
histidine-tRNA ligase activity	4821	1	1	1	1	1	0	0	0
isoleucine-tRNA ligase activity	4822	1	1	1	1	1	0	0	0
leucine-tRNA ligase activity	4823	1	1	1	1	1	0	0	0
lysine-tRNA ligase activity	4824	1	1	1	1	1	0	0	0
methionine-tRNA ligase activity	4825	1	0.05621	1	1	1	0	100	1
phenylalanine-tRNA ligase activity	4826	0.47447	1	0.47129	0.0754	3	3	33	1
proline-tRNA ligase activity	4827	1	1	1	1	1	0	0	0
serine-tRNA ligase activity	4828	1	1	1	1	1	0	0	0
threonine-tRNA ligase activity	4829	0.10787	1	0.84514	1	2	2	0	0
tryptophan 2\,3-dioxygenase activity	4833	1	1	1	1	1	0	0	0
tubulin-tyrosine ligase activity	4835	0.75704	1	0.24886	1	5	5	0	0
tyrosine transaminase activity	4838	1	1	1	1	1	0	0	0
ubiquitin activating enzyme activity	4839	0.42411	1	0.75553	1	4	4	0	0
ubiquitin conjugating enzyme activity	4840	0.01846	0.17742	0.99421	1	26	26	12	3
ubiquitin-protein ligase activity	4842	0.01295	0.26728	0.95754	1	32	32	9	3
ubiquitin-specific protease activity	4843	0.02346	1	0.74595	1	28	28	0	0
uracil DNA N-glycosylase activity	4844	0.19439	1	0.82641	1	3	3	0	0
uridine kinase activity	4849	0.25824	1	0.86314	1	5	5	0	0
uridine phosphorylase activity	4850	1	1	1	1	1	0	0	0
uroporphyrinogen decarboxylase activity	4853	1	1	1	1	1	0	0	0
xanthine dehydrogenase activity	4854	0.99729	1	0.00842	0.05092	2	2	50	1
xanthine oxidase activity	4855	1	1	1	0.02579	1	0	100	1
enzyme inhibitor activity	4857	0.93681	0.95839	0.01446	0.87948	140	139	4	6
phospholipase inhibitor activity	4859	0.91365	1	0.31282	0.12249	5	5	20	1
protein kinase inhibitor activity	4860	0.61951	1	0.42241	1	16	16	0	0
cyclin-dependent protein kinase inhibitor activity	4861	0.85133	1	0.13391	1	5	5	0	0
cAMP-dependent protein kinase inhibitor activity	4862	1	1	1	1	1	0	0	0
protein phosphatase inhibitor activity	4864	0.87998	1	0.60247	1	7	7	0	0
type 1 serine/threonine specific protein phosphatase inhibitor activity	4865	1	1	1	1	1	0	0	0
endopeptidase inhibitor activity	4866	0.86122	0.70193	0.09649	0.88911	84	84	6	5
serine-type endopeptidase inhibitor activity	4867	0.97152	0.83784	0.01556	0.77494	57	57	5	3
serpin	4868	0.67949	1	0.34784	1	2	2	0	0
cysteine protease inhibitor activity	4869	0.23214	0.3321	0.86672	1	21	21	10	2
signal transducer activity	4871	0.6209	0.10466	0	0.00026	1371	1287	11	145
receptor activity	4872	0.85913	0.49291	0	0.00792	881	846	10	85
complement receptor activity	4875	0.35667	0.10926	0.33174	1	2	2	50	1
complement component C3b receptor activity	4877	0.35667	0.10926	0.33174	1	2	2	50	1
ligand-dependent nuclear receptor activity	4879	0.64876	0.73583	0.32264	1	23	23	4	1
androgen receptor activity	4882	1	1	1	1	1	0	0	0
ecdysteroid hormone receptor activity	4884	1	1	1	1	1	0	0	0
retinoid-X receptor activity	4886	0.90973	1	0.22492	1	3	3	0	0
thyroid hormone receptor activity	4887	0.75275	0.33301	0.84569	1	7	7	14	1
transmembrane receptor activity	4888	0.92169	0.42917	0	0.07471	546	533	10	52
nicotinic acetylcholine-activated cation-selective channel activity	4889	0.98084	0.58021	0.01887	0.32436	15	15	13	2
GABA-A receptor activity	4890	0.83116	0.6261	0.08947	1	17	17	6	1
glycine-inhibited chloride channel activity	4891	0.96349	1	0.25153	1	3	3	0	0
T cell receptor activity	4894	0.54649	1	0.14081	1	2	2	0	0
cell adhesion receptor activity	4895	0.38835	1	0.69687	1	20	20	0	0
hematopoietin/interferon-class (D200-domain) cytokine receptor activity	4896	0.95636	1	0.00705	0.60995	36	36	3	1
erythropoietin receptor activity	4900	1	1	1	1	1	0	0	0
growth hormone receptor activity	4903	1	1	1	1	1	0	0	0
interleukin receptor activity	4907	0.95235	1	0.00024	1	12	12	0	0
interleukin-1 receptor activity	4908	0.99035	1	0.02377	1	2	2	0	0
interleukin-1\, Type II\, blocking receptor activity	4910	0.99035	1	0.07053	1	2	2	0	0
interleukin-2 receptor activity	4911	1	1	1	1	1	0	0	0
interleukin-3 receptor activity	4912	1	1	1	1	1	0	0	0
interleukin-4 receptor activity	4913	1	1	1	1	1	0	0	0
interleukin-5 receptor activity	4914	0.686	1	0.13781	1	2	2	0	0
interleukin-7 receptor activity	4917	0.96957	1	0.0564	1	2	2	0	0
interleukin-8 receptor activity	4918	0.33929	1	0.71952	1	3	3	0	0
interleukin-10 receptor activity	4920	1	1	1	1	1	0	0	0
non-G-protein coupled 7TM receptor activity	4926	0.66703	0.40591	0.31123	1	9	9	11	1
frizzled receptor activity	4928	0.89982	1	0.27765	1	2	2	0	0
G-protein coupled receptor activity	4930	0.99025	0.65527	2e-05	0.22021	325	320	9	28
ATP-gated cation channel activity	4931	0.9764	1	0.02816	1	2	2	0	0
adrenoceptor activity	4935	0.91625	1	0.02117	1	5	5	0	0
alpha1-adrenergic receptor activity	4937	0.77258	1	0.5392	1	2	2	0	0
alpha2-adrenergic receptor activity	4938	0.94604	1	0.01078	1	3	3	0	0
beta-adrenergic receptor activity	4939	0.90965	1	0.0225	1	2	2	0	0
beta1-adrenergic receptor activity	4940	1	1	1	1	1	0	0	0
beta2-adrenergic receptor activity	4941	1	1	1	1	1	0	0	0
anaphylatoxin receptor activity	4942	1	1	1	1	1	0	0	0
C5a anaphylatoxin receptor activity	4944	1	1	1	1	1	0	0	0
angiotensin type II receptor activity	4945	0.65605	1	0.11233	0.39146	19	19	5	1
bombesin receptor activity	4946	0.98072	1	0.19228	1	3	3	0	0
calcitonin receptor activity	4948	1	1	1	1	1	0	0	0
cannabinoid receptor activity	4949	0.99378	1	0.00809	1	3	3	0	0
chemokine receptor activity	4950	0.52715	1	0.45921	1	30	30	0	0
cholecystokinin receptor activity	4951	0.712	1	0.06477	1	2	2	0	0
dopamine receptor activity	4952	0.81435	1	0.03991	1	6	6	0	0
prostaglandin D receptor activity	4956	1	1	1	1	1	0	0	0
prostaglandin E receptor activity	4957	0.93879	1	0.04775	1	3	3	0	0
thromboxane receptor activity	4960	0.64133	1	0.33563	1	4	4	0	0
thromboxane A2 receptor activity	4961	1	1	1	1	1	0	0	0
endothelin receptor activity	4962	1	1	1	1	1	0	0	0
follicle stimulating hormone receptor activity	4963	1	1	1	1	1	0	0	0
GABA-B receptor activity	4965	0.76281	1	0.07928	1	2	2	0	0
galanin receptor activity	4966	0.87639	1	0.39265	1	3	3	0	0
glucagon receptor activity	4967	0.89958	1	0.11177	1	2	2	0	0
gonadotropin-releasing hormone receptor activity	4968	1	1	1	1	1	0	0	0
histamine receptor activity	4969	0.63343	1	0.10622	1	8	8	0	0
ionotropic glutamate receptor activity	4970	0.89816	1	0.01316	1	5	5	0	0
alpha-amino-3-hydroxy-5-methyl-4-isoxazole propionate selective glutamate receptor activity	4971	1	1	1	1	1	0	0	0
N-methyl-D-aspartate selective glutamate receptor activity	4972	0.442	1	0.60354	1	2	2	0	0
leukotriene receptor activity	4974	0.75035	1	0.6894	1	2	2	0	0
melanocortin receptor activity	4977	0.84013	1	0.19371	1	5	5	0	0
adrenocorticotropin receptor activity	4978	1	1	1	1	1	0	0	0
muscarinic acetylcholine receptor activity	4981	0.48592	1	0.10251	1	5	5	0	0
N-formyl peptide receptor activity	4982	0.48476	1	0.58932	1	5	5	0	0
neuropeptide Y receptor activity	4983	0.94329	1	0.09683	1	10	10	0	0
olfactory receptor activity	4984	0.9988	1	0.12754	0.06078	35	35	9	3
opioid receptor activity	4985	0.94016	1	0.04135	1	6	6	0	0
delta-opioid receptor activity	4986	1	1	1	1	1	0	0	0
mu-opioid receptor activity	4988	1	1	1	1	1	0	0	0
oxytocin receptor activity	4990	1	1	1	1	1	0	0	0
parathyroid hormone receptor activity	4991	0.29872	0.10926	0.84962	1	2	2	50	1
platelet activating factor receptor activity	4992	1	1	1	1	1	0	0	0
serotonin receptor activity	4993	0.63314	0.52868	0.61262	1	13	13	8	1
somatostatin receptor activity	4994	0.78204	1	0.01444	1	3	3	0	0
tachykinin receptor activity	4995	1	1	1	1	1	0	0	0
thyrotropin-releasing hormone receptor activity	4997	1	1	1	1	1	0	0	0
vasoactive intestinal polypeptide receptor activity	4999	0.99427	1	0.00921	1	2	2	0	0
vasopressin receptor activity	5000	0.33463	1	0.98008	1	2	2	0	0
transmembrane receptor protein tyrosine phosphatase activity	5001	0.17532	0.20658	0.38767	1	4	4	25	1
ephrin receptor activity	5003	0.0414	0.43931	0.35981	0.23	10	10	20	2
transmembrane-ephrin receptor activity	5005	0.48366	0.15932	0.21376	1	3	3	33	1
epidermal growth factor receptor activity	5006	0.52804	1	0.63566	1	2	2	0	0
fibroblast growth factor receptor activity	5007	0.71433	1	0.44831	1	2	2	0	0
Neu/ErbB-2 receptor activity	5012	1	1	1	1	1	0	0	0
neurotrophin TRKA receptor activity	5014	1	1	1	1	1	0	0	0
platelet-derived growth factor alpha-receptor activity	5018	1	1	1	1	1	0	0	0
vascular endothelial growth factor receptor activity	5021	1	1	1	1	1	0	0	0
transforming growth factor beta receptor activity	5024	0.93072	1	0.24901	1	4	4	0	0
transforming growth factor beta receptor activity\, type II	5026	1	1	1	1	1	0	0	0
NGF/TNF (6 C-domain) receptor activity	5027	0.76127	1	0.06928	1	2	2	0	0
tumor necrosis factor receptor activity	5031	0.84648	1	0.24659	1	2	2	0	0
death receptor activity	5035	0.68648	1	0.50422	1	4	4	0	0
death receptor adaptor protein activity	5037	0.54772	1	0.25831	1	6	6	0	0
death receptor interacting protein activity	5038	1	1	1	1	1	0	0	0
low-density lipoprotein receptor activity	5041	0.83434	1	0.42986	1	5	5	0	0
netrin receptor activity	5042	1	1	1	1	1	0	0	0
scavenger receptor activity	5044	0.47737	0.07694	0.04674	0.07741	18	18	28	5
signal recognition particle binding	5047	1	1	1	1	1	0	0	0
signal sequence binding	5048	0.22135	0.40591	0.99002	1	9	9	11	1
nuclear export signal receptor activity	5049	0.0655	1	0.91119	1	2	2	0	0
laminin receptor activity	5055	1	1	1	1	1	0	0	0
receptor signaling protein activity	5057	0.55179	0.34782	0.67059	0.75008	53	53	9	5
aryl hydrocarbon receptor nuclear translocator activity	5061	1	1	1	1	1	0	0	0
transmembrane receptor protein tyrosine kinase signaling protein activity	5066	0.87826	1	0.29217	1	4	4	0	0
transmembrane receptor protein tyrosine kinase adaptor protein activity	5068	0.90422	1	0.12997	1	3	3	0	0
SH3/SH2 adaptor activity	5070	0.89107	0.80225	0.04631	1	28	28	4	1
transmembrane receptor protein serine/threonine kinase signaling protein activity	5071	0.0657	0.10926	0.99335	1	2	2	50	1
transforming growth factor beta receptor\, cytoplasmic mediator activity	5072	0.0657	0.10926	0.99335	1	2	2	50	1
receptor signaling protein serine/threonine kinase signaling protein activity	5076	0.52236	0.15932	0.55925	1	3	3	33	1
MAP-kinase scaffold activity	5078	0.69159	1	0.14028	1	2	2	0	0
protein kinase A anchoring activity	5079	0.69219	1	0.08009	1	2	2	0	0
protein kinase C binding	5080	0.21312	1	0.52933	1	3	3	0	0
small GTPase regulator activity	5083	0.89065	0.43803	0.05136	0.46056	60	60	10	6
guanyl-nucleotide exchange factor activity	5085	0.84215	0.37663	0.07935	0.63941	39	39	10	4
ARF guanyl-nucleotide exchange factor activity	5086	1	1	1	1	1	0	0	0
Ras guanyl-nucleotide exchange factor activity	5088	0.94798	1	0.01924	1	2	2	0	0
Rho guanyl-nucleotide exchange factor activity	5089	1	1	1	1	1	0	0	0
GDP-dissociation inhibitor activity	5092	0.8882	1	0.33249	1	2	2	0	0
Rab GDP-dissociation inhibitor activity	5093	1	1	1	1	1	0	0	0
Rho GDP-dissociation inhibitor activity	5094	1	1	1	1	1	0	0	0
GTPase inhibitor activity	5095	0.49371	1	0.90078	1	3	3	0	0
GTPase activator activity	5096	0.34096	0.1215	0.90927	1	34	34	12	4
Ran GTPase activator activity	5098	1	1	1	1	1	0	0	0
Ras GTPase activator activity	5099	1	0.05621	1	1	1	0	100	1
Rho GTPase activator activity	5100	0.38636	1	0.54441	1	6	6	0	0
receptor binding	5102	0.23968	0.00373	0	0.00256	358	352	15	52
fibroblast growth factor receptor binding	5104	0.68385	0.25119	0.17726	1	5	5	20	1
Notch binding	5112	0.48428	1	0.76981	1	2	2	0	0
Toll binding	5121	1	1	1	1	1	0	0	0
death receptor binding	5123	0.73476	1	0.36884	1	5	5	0	0
cytokine activity	5125	0.05957	3e-05	0.00093	0.0049	147	146	22	32
hematopoietin/interferon-class (D200-domain) cytokine receptor binding	5126	0.52831	0.06582	0.00782	0.00045	39	39	28	11
erythropoietin receptor binding	5128	0.7637	1	0.09757	1	2	2	0	0
granulocyte macrophage colony-stimulating factor receptor binding	5129	1	1	1	1	1	0	0	0
granulocyte colony-stimulating factor receptor binding	5130	1	1	1	1	1	0	0	0
growth hormone receptor binding	5131	0.29397	0.10926	0.3563	1	2	2	50	1
interferon-alpha/beta receptor binding	5132	0.96181	0.52868	0.00709	1e-05	13	13	46	6
interferon-gamma receptor binding	5133	1	1	1	1	1	0	0	0
interleukin-2 receptor binding	5134	1	1	1	1	1	0	0	0
interleukin-3 receptor binding	5135	1	1	1	1	1	0	0	0
interleukin-4 receptor binding	5136	1	1	1	1	1	0	0	0
interleukin-5 receptor binding	5137	1	1	1	1	1	0	0	0
interleukin-6 receptor binding	5138	0.80876	1	0.22163	1	2	2	0	0
interleukin-9 receptor binding	5140	1	1	1	1	1	0	0	0
interleukin-10 receptor binding	5141	1	1	1	1	1	0	0	0
interleukin-12 receptor binding	5143	0.96199	1	0.10368	1	2	2	0	0
interleukin-13 receptor binding	5144	1	1	1	1	1	0	0	0
oncostatin-M receptor binding	5147	1	0.05621	1	1	1	0	100	1
prolactin receptor binding	5148	1	1	1	1	1	0	0	0
interleukin-1 receptor binding	5149	0.17302	0.43931	0.84766	1	10	10	10	1
interleukin-1 receptor antagonist activity	5152	0.47045	0.20658	0.34218	1	4	4	25	1
interleukin-8 receptor binding	5153	1	0.05621	1	1	1	0	100	1
epidermal growth factor receptor binding	5154	0.16845	0.20658	0.98052	1	4	4	25	1
epidermal growth factor receptor activating ligand activity	5155	0.34198	1	0.97753	1	2	2	0	0
macrophage colony stimulating factor receptor binding	5157	1	1	1	1	1	0	0	0
insulin receptor binding	5158	0.74513	1	0.46058	1	9	9	0	0
insulin-like growth factor receptor binding	5159	0.67191	1	0.55275	1	2	2	0	0
transforming growth factor beta receptor binding	5160	0.37939	1	0.63071	1	5	5	0	0
platelet-derived growth factor receptor binding	5161	0.99475	1	0.07249	0.0754	3	3	33	1
tumor necrosis factor receptor binding	5164	0.89541	0.52868	0.25243	1	13	13	8	1
neurotrophin receptor binding	5165	1	1	1	1	1	0	0	0
neurotrophin p75 receptor binding	5166	1	1	1	1	1	0	0	0
vascular endothelial growth factor receptor binding	5172	0.07381	0.10926	0.98549	1	2	2	50	1
stem cell factor receptor binding	5173	1	1	1	1	1	0	0	0
CD40 receptor binding	5174	1	1	1	1	1	0	0	0
integrin binding	5178	0.47597	0.14352	0.50848	1	12	12	17	2
hormone activity	5179	0.82773	0.35391	0.00028	0.18188	86	86	12	10
peptide hormone	5180	0.72912	0.29328	0.34514	0.14513	6	6	33	2
luteinizing hormone-releasing factor activity	5183	1	1	1	1	1	0	0	0
neuropeptide hormone activity	5184	0.99407	1	0.00514	0.37534	18	18	6	1
neurohypophyseal hormone activity	5185	0.53894	1	0.20115	1	2	2	0	0
milk protein	5189	1	0.05621	1	1	1	0	100	1
cell adhesion molecule activity	5194	0.05252	2e-05	0.00665	0.00079	179	178	21	38
structural molecule activity	5198	0.53417	0.10842	0.01856	0.60031	405	398	10	39
structural constituent of cytoskeleton	5200	0.97459	0.84074	0.0026	0.34779	81	81	7	6
extracellular matrix structural constituent	5201	0.25862	0.00808	0.00304	1	52	52	15	8
collagen	5202	0.45192	0.33301	0.13297	1	7	7	14	1
extracellular matrix glycoprotein	5207	0.5761	1	0.45572	1	2	2	0	0
plasma protein	5209	0.40025	1	0.6628	1	2	2	0	0
plasma glycoprotein	5211	0.86848	1	0.41347	1	3	3	0	0
structural constituent of eye lens	5212	0.99306	1	0.00016	0.39146	19	19	5	1
transporter activity	5215	0.86757	0.77754	0.0006	0.00042	940	900	10	90
ion channel activity	5216	0.97625	0.92649	0	0.01267	195	193	9	18
intracellular ligand-gated ion channel activity	5217	0.65556	0.29328	0.58404	1	6	6	17	1
inositol 1\,4\,5-triphosphate-sensitive calcium-release channel activity	5220	1	1	1	1	1	0	0	0
intracellular cyclic nucleotide activated cation channel activity	5221	1	1	1	1	1	0	0	0
ATP-binding and phosphorylation-dependent chloride channel activity	5224	0.52252	0.20658	0.86027	1	4	4	25	1
calcium activated cation channel activity	5227	1	1	1	1	1	0	0	0
extracellular ligand-gated ion channel activity	5230	0.9399	0.4075	0.0001	0.6578	41	41	10	4
excitatory extracellular ligand-gated ion channel activity	5231	0.93426	0.4531	0.00123	0.50637	27	27	11	3
serotonin-activated cation-selective channel activity	5232	0.12614	0.10926	0.99997	1	2	2	50	1
glutamate-gated ion channel activity	5234	0.92353	1	0.00196	1	4	4	0	0
inhibitory extracellular ligand-gated ion channel activity	5237	0.96349	1	0.25153	1	3	3	0	0
inward rectifier potassium channel activity	5242	0.93839	1	0.23102	0.24987	11	11	9	1
gap-junction forming channel activity	5243	0.60844	1	0.57121	1	10	10	0	0
voltage-gated ion channel activity	5244	0.97179	0.99594	0	0.03634	95	95	7	7
voltage-gated calcium channel activity	5245	0.74195	1	0.00212	1	13	13	0	0
calcium channel regulator activity	5246	0.9851	1	0.08999	1	2	2	0	0
voltage-gated chloride channel activity	5247	0.99072	1	0.05177	0.16719	7	7	14	1
voltage-gated sodium channel activity	5248	0.99399	1	0.07409	0.23	10	10	10	1
voltage-gated potassium channel activity	5249	0.90907	1	1e-05	0.06899	60	60	7	4
A-type (transient outward) potassium channel activity	5250	1	1	1	1	1	0	0	0
delayed rectifier potassium channel activity	5251	0.99466	1	0.03384	0.0128	7	7	29	2
anion channel activity	5253	0.89599	0.66698	0.0228	0.39146	19	19	11	2
chloride channel activity	5254	0.84845	0.52868	0.0401	0.28809	13	13	15	2
cation channel activity	5261	0.9942	0.98906	0	0.07975	144	143	7	10
calcium channel activity	5262	0.67744	1	0.00171	1	25	25	0	0
potassium channel activity	5267	0.80504	1	0	0.12399	74	74	5	4
sodium channel activity	5272	0.99173	1	0.02222	0.30646	14	14	7	1
amine transporter activity	5275	0.54715	0.62346	0.42339	0.24718	37	37	11	4
acetylcholine transporter activity	5277	1	1	1	1	1	0	0	0
amino acid-polyamine transporter activity	5279	0.31721	0.72008	0.68145	0.43739	22	22	9	2
sodium\:amino acid symporter activity	5283	1	1	1	1	1	0	0	0
neutral L-amino acid porter activity	5294	1	1	1	1	1	0	0	0
dicarboxylic acid transporter activity	5310	1	1	1	1	1	0	0	0
sodium\:dicarboxylate/tricarboxylate symporter activity	5311	0.43208	1	0.74747	1	2	2	0	0
L-glutamate transporter activity	5313	0.69742	1	0.61919	1	2	2	0	0
inorganic phosphate transporter activity	5315	1	0.05621	1	1	1	0	100	1
lipid transporter activity	5319	0.99386	1	0.02337	1e-05	31	31	23	7
apolipoprotein	5320	0.01885	0.10926	0.99527	1	2	2	50	1
high-density lipoprotein	5321	1	1	1	1	1	0	0	0
neurotransmitter transporter activity	5326	0.98317	1	0.01834	0.24987	11	11	9	1
neurotransmitter\:sodium symporter activity	5328	0.95738	1	0.00157	0.20961	9	9	11	1
dopamine transporter activity	5329	1	1	1	1	1	0	0	0
dopamine\:sodium symporter activity	5330	1	1	1	1	1	0	0	0
norepinephrine transporter activity	5333	1	1	1	1	1	0	0	0
norephinephrine\:sodium symporter activity	5334	1	1	1	1	1	0	0	0
serotonin\:sodium symporter activity	5335	1	1	1	0.02579	1	0	100	1
nucleoside transporter activity	5337	0.18592	1	0.70776	1	5	5	0	0
nucleotide-sugar transporter activity	5338	0.14048	1	0.53895	1	5	5	0	0
organic acid transporter activity	5342	0.85526	0.90689	0.24366	0.28565	41	41	7	3
organic acid\:sodium symporter activity	5343	1	1	0.12215	0.14513	6	6	17	1
oxygen transporter activity	5344	0.97791	1	0.07309	1	5	5	0	0
sugar porter activity	5351	0.62565	0.73583	0.34313	0.11782	23	23	13	3
glucose transporter activity	5355	0.98607	1	0.30323	0.14513	6	6	17	1
water transporter activity	5372	0.5798	0.40591	0.13508	0.20961	9	9	22	2
copper ion transporter activity	5375	1	1	1	1	1	0	0	0
iron ion transporter activity	5381	0.92074	1	0.02029	1	2	2	0	0
zinc ion transporter activity	5385	1	0.05621	1	1	1	0	100	1
carrier activity	5386	0.6409	0.57341	0.26343	0.01506	200	198	11	22
calcium-transporting ATPase activity	5388	0.2142	1	0.42397	1	2	2	0	0
sodium\:potassium-exchanging ATPase activity	5391	0.99949	1	0.01901	0.14513	6	6	17	1
cation\:sugar symporter activity	5402	1	1	1	1	1	0	0	0
hydrogen\:sugar symporter activity	5403	1	1	1	1	1	0	0	0
glucose\:sodium symporter activity	5412	1	1	1	1	1	0	0	0
nucleoside\:sodium symporter activity	5415	1	1	1	1	1	0	0	0
calcium\:sodium antiporter activity	5432	1	1	1	1	1	0	0	0
sodium\:phosphate symporter activity	5436	0.31954	0.10926	0.95865	1	2	2	50	1
monovalent cation\:proton antiporter activity	5451	0.70966	1	0.46216	1	4	4	0	0
inorganic anion exchanger activity	5452	0.7674	0.37052	0.10552	0.01677	8	8	38	3
UDP-galactose transporter activity	5459	0.01639	1	0.67569	1	3	3	0	0
UDP-N-acetylglucosamine transporter activity	5462	1	1	1	1	1	0	0	0
intracellular transporter activity	5478	0.56842	0.43931	0.28737	1	10	10	10	1
vesicle transport	5480	1	1	1	1	1	0	0	0
SNAP receptor activity	5484	1	1	1	1	1	0	0	0
nucleocytoplasmic transporter activity	5487	0.45704	1	0.60801	1	2	2	0	0
binding	5488	0.1942	0.00012	0.08108	0.03393	4019	3294	10	397
electron transporter activity	5489	0.43514	0.1055	0.56998	0.02365	187	185	13	25
steroid binding	5496	0.97691	0.76472	0.13892	0.47985	25	25	8	2
androgen binding	5497	0.54095	0.15932	0.58033	1	3	3	33	1
sterol carrier activity	5498	0.45657	1	0.74731	1	3	3	0	0
vitamin D binding	5499	1	1	1	1	1	0	0	0
retinoid binding	5501	0.94447	1	0.02468	1	8	8	0	0
fatty acid binding	5504	0.92481	0.43931	0.10905	0.23	10	10	20	2
heavy metal binding	5505	0.20957	0.33301	0.84429	1	7	7	14	1
iron ion binding	5506	0.78959	0.24727	0.04567	1	17	17	12	2
copper ion binding	5507	0.87743	0.72008	0.04584	0.01825	22	22	18	4
copper/cadmium binding	5508	0.99966	1	0.00292	1e-05	6	6	67	4
calcium ion binding	5509	0.11751	0.00014	0.0362	0.092	333	328	15	49
calcium ion storage activity	5514	0.56706	0.20658	0.56135	0.09925	4	4	50	2
protein binding	5515	0.71841	0.1766	0.00217	0.01451	1147	1088	10	114
calmodulin binding	5516	0.83989	0.739	0.07415	0.69979	46	46	7	3
calmodulin inhibitor activity	5517	1	1	1	1	1	0	0	0
collagen binding	5518	0.35411	1	0.84136	1	9	9	0	0
cytoskeletal regulatory protein binding	5519	1	1	1	1	1	0	0	0
insulin-like growth factor binding	5520	0.63166	1	0.47021	0.16719	7	7	14	1
lamin binding	5521	0.08446	1	0.77646	1	3	3	0	0
tropomyosin binding	5523	0.45333	0.15932	0.61607	1	3	3	33	1
ATP binding	5524	0.00101	0.00033	0.9357	0.42222	578	563	12	69
GTP binding	5525	0.68148	0.95839	0.30613	0.70379	140	139	5	7
macrolide binding	5527	1	1	1	1	1	0	0	0
FK506 binding	5528	1	1	1	1	1	0	0	0
sugar binding	5529	0.87386	0.91178	0.00255	0.71243	96	96	5	5
lectin	5530	0.62732	1	0.0845	1	3	3	0	0
mannose binding	5537	0.9689	1	0.23196	1	2	2	0	0
glycosaminoglycan binding	5539	0.36637	0.08135	0.08624	0.16264	54	54	17	9
hyaluronic acid binding	5540	0.44518	0.12403	0.01385	1	11	11	18	2
folic acid binding	5542	0.16303	0.40591	0.97434	1	9	9	11	1
phospholipid binding	5543	0.65257	0.24727	0.42122	1	17	17	12	2
calcium-dependent phospholipid binding	5544	0.38275	0.29328	0.74001	1	6	6	17	1
phosphatidylinositol binding	5545	0.04251	0.15932	0.99475	1	3	3	33	1
phosphatidylinositol-4\,5-bisphosphate binding	5546	1	1	1	1	1	0	0	0
phospholipid transporter activity	5548	0.14604	1	0.48914	1	9	9	0	0
odorant binding	5549	0.43062	1	0.33381	1	2	2	0	0
ubiquitin	5551	0.89155	1	0.27076	1	2	2	0	0
molecular function unknown	5554	0.05089	0.53891	0.89775	0.16856	339	334	9	31
blood group antigen	5555	1	1	1	1	1	0	0	0
lymphocyte antigen	5557	1	1	1	1	1	0	0	0
fibrinogen	8001	1	1	1	1	1	0	0	0
chemokine activity	8009	0.04359	0.00024	0.15733	0.19003	31	31	32	10
beta-catenin binding	8013	0.50124	1	0.42297	1	2	2	0	0
calcium-dependent cell adhesion molecule activity	8014	0.00997	1e-05	0.67493	0.04871	32	32	41	13
microtubule binding	8017	0.66732	1	0.78114	1	8	8	0	0
G-protein coupled photoreceptor activity	8020	0.91548	1	0.19716	0.14513	6	6	17	1
protein C-terminus binding	8022	0.69258	1	0.71807	1	11	11	0	0
diazepam binding inhibitor activity	8025	1	1	1	1	1	0	0	0
ATP-dependent helicase activity	8026	0.05917	0.49675	0.93089	1	47	47	6	3
monocarboxylic acid transporter activity	8028	0.92743	1	0.08135	0.23	10	10	10	1
lipoprotein binding	8034	0.63472	0.16358	0.05705	0.28809	13	13	23	3
high-density lipoprotein binding	8035	0.99985	1	0.0146	0.05092	2	2	50	1
iron-sulfur electron transfer carrier	8042	0.3649	1	0.54941	1	3	3	0	0
axon guidance receptor activity	8046	0.30006	0.10926	0.53007	1	2	2	50	1
enzyme activator activity	8047	0.4332	0.23594	0.76484	0.29823	74	74	12	9
calcium sensitive guanylate cyclase activator activity	8048	0.99923	1	0.00135	0.09925	4	4	25	1
ARF GTPase activator activity	8060	1	1	1	1	1	0	0	0
chitin binding	8061	0.7826	1	0.19978	1	4	4	0	0
glutamate receptor activity	8066	0.28326	0.24727	0.56716	1	17	17	12	2
metabotropic glutamate\, GABA-B-like receptor activity	8067	0.2655	0.14352	0.9977	1	12	12	17	2
ornithine decarboxylase inhibitor activity	8073	0.45733	1	0.29949	1	2	2	0	0
Hsp70/Hsp90 organizing protein activity	8077	0.96648	1	0.32989	1	2	2	0	0
translation termination factor activity	8079	0.06845	1	0.91413	1	2	2	0	0
N-acetyltransferase activity	8080	0.67341	1	0.30967	1	15	15	0	0
phosphoric diester hydrolase activity	8081	0.99408	1	0.01018	0.54363	30	30	3	1
growth factor activity	8083	0.76297	0.11455	0.00046	0.12024	101	101	14	14
cytoskeletal protein binding	8092	0.91075	0.32811	0.01671	0.00538	149	148	13	20
cytoskeletal adaptor activity	8093	0.23447	1	0.88792	1	3	3	0	0
DNA-dependent ATPase activity	8094	0.00025	0.13942	0.97748	1	49	49	10	5
inositol-1\,4\,5-triphosphate receptor activity	8095	1	1	1	1	1	0	0	0
galactoside 2-alpha-L-fucosyltransferase activity	8107	1	1	1	1	1	0	0	0
N-acetyllactosaminide beta-1\,6-N-acetylglucosaminyltransferase activity	8109	0.99981	1	0.011	0.05092	2	2	50	1
protein-methionine-S-oxide reductase activity	8113	1	1	1	1	1	0	0	0
prostaglandin-I synthase activity	8116	1	1	1	1	1	0	0	0
ubiquinol-cytochrome-c reductase activity	8121	0.96026	1	0.38126	1	6	6	0	0
cholesterol 7-alpha-monooxygenase activity	8123	1	1	1	1	1	0	0	0
4-alpha-hydroxytetrahydrobiopterin dehydratase activity	8124	1	1	1	1	1	0	0	0
pancreatic elastase I activity	8125	0.50484	0.15932	0.92728	1	3	3	33	1
amine oxidase activity	8131	1	1	1	0.02579	1	0	100	1
pancreatic elastase activity	8132	0.48826	0.25119	0.65749	1	5	5	20	1
collagenase activity	8133	0.00019	1e-05	0.99981	1	4	4	100	4
transcription factor binding	8134	0.08959	0.87821	0.60185	0.86369	134	133	5	7
translation factor activity\, nucleic acid binding	8135	2e-05	0.95079	0.76499	1	52	52	2	1
NADH dehydrogenase (ubiquinone) activity	8137	0.22988	1	0.53741	1	19	19	0	0
protein tyrosine/serine/threonine phosphatase activity	8138	0.23215	0.39398	0.66199	1	24	24	8	2
nuclear localization sequence binding	8139	0.16288	1	0.90394	1	3	3	0	0
poly(A) binding	8143	0.07548	1	0.91469	1	4	4	0	0
drug binding	8144	0.21851	1	0.75356	1	3	3	0	0
sulfotransferase activity	8146	0.7491	0.26728	0.0084	0.5669	32	32	13	4
structural constituent of bone	8147	0.50595	0.15932	0.6345	1	3	3	33	1
hedgehog receptor activity	8158	0.99015	1	0.18848	1	4	4	0	0
positive transcription elongation factor activity	8159	0.81482	1	0.34329	1	2	2	0	0
protein tyrosine phosphatase activator activity	8160	1	1	1	1	1	0	0	0
methyltransferase activity	8168	0.00011	0.73593	0.87409	0.19228	88	88	9	8
N-methyltransferase activity	8170	0.03478	0.55519	0.93784	1	14	14	7	1
O-methyltransferase activity	8171	0.46307	0.15932	0.82947	1	3	3	33	1
S-methyltransferase activity	8172	0.33877	1	0.49321	0.0754	3	3	33	1
RNA methyltransferase activity	8173	0.02458	1	0.79489	0.28809	13	13	8	1
mRNA methyltransferase activity	8174	0.06688	1	0.71548	1	2	2	0	0
tRNA methyltransferase activity	8175	0.01261	1	0.76781	1	4	4	0	0
tRNA (guanine-N7-)-methyltransferase activity	8176	1	1	1	1	1	0	0	0
succinate dehydrogenase (ubiquinone) activity	8177	1	1	1	1	1	0	0	0
tumor suppressor	8181	0.90346	0.64713	0.34231	1	18	18	6	1
glycogen phosphorylase activity	8184	0.99978	1	0.13245	0.05092	2	2	50	1
RNA-dependent ATPase activity	8186	0.35074	1	0.79323	1	11	11	0	0
poly-pyrimidine tract binding	8187	1	1	1	1	1	0	0	0
neuropeptide receptor activity	8188	0.82996	0.33301	0.05811	1	7	7	14	1
apoptosis inhibitor activity	8189	0.29088	0.81338	0.68884	0.53153	29	29	7	2
metalloendopeptidase inhibitor activity	8191	0.97647	1	0.05899	1	2	2	0	0
RNA guanylyltransferase activity	8192	1	1	1	1	1	0	0	0
tRNA guanylyltransferase activity	8193	1	1	1	1	1	0	0	0
UDP-glycosyltransferase activity	8194	0.9999	0.71628	0.0096	1e-05	44	44	23	10
phosphatidate phosphatase activity	8195	1	1	1	1	1	0	0	0
ferric iron binding	8199	0.50839	0.15932	0.62836	1	3	3	33	1
ion channel inhibitor activity	8200	0.67064	1	0.49653	1	14	14	0	0
heparin binding	8201	0.69563	0.39211	0.26176	0.08363	40	40	15	6
tumor antigen	8222	0.27374	0.15932	0.47397	0.0754	3	3	67	2
Gram positive antibacterial peptide activity	8224	0.90554	1	0.07091	1	3	3	0	0
Gram negative antibacterial peptide activity	8225	1	1	1	1	1	0	0	0
opsonin activity	8229	0.40025	1	0.26304	1	2	2	0	0
peptidase activity	8233	0.23146	0.00242	0.33076	0.20904	321	316	13	42
cysteine-type peptidase activity	8234	0.01159	0.97815	0.65931	0.82222	66	66	3	2
metalloexopeptidase activity	8235	0.51481	0.17742	0.38898	0.14407	26	26	19	5
serine-type peptidase activity	8236	0.35914	0.00557	0.00017	0.1807	116	115	16	19
metallopeptidase activity	8237	0.18215	0.00226	0.10281	0.06339	83	83	20	17
exopeptidase activity	8238	0.65807	0.22143	0.15119	0.00623	29	29	24	7
dipeptidyl-peptidase activity	8239	0.24796	0.15932	0.87847	1	3	3	33	1
tripeptidyl-peptidase activity	8240	1	1	1	1	1	0	0	0
peptidyl-dipeptidase activity	8241	0.99298	1	0.01099	1	2	2	0	0
omega peptidase activity	8242	0.17537	0.15932	0.99967	1	3	3	33	1
plasminogen activator activity	8243	0.26601	0.15932	0.99977	1	3	3	33	1
electron transfer flavoprotein	8246	1	0.05621	1	1	1	0	100	1
pre-mRNA splicing factor activity	8248	0.00199	0.92175	0.84449	1	44	44	2	1
tRNA specific adenosine deaminase activity	8251	1	1	1	1	1	0	0	0
nucleotidase activity	8252	0.61294	1	0.45401	1	3	3	0	0
5'-nucleotidase activity	8253	0.61294	1	0.45401	1	3	3	0	0
importin-alpha export receptor activity	8262	1	0.05621	1	1	1	0	100	1
poly(U) binding	8266	0.43707	1	0.569	1	3	3	0	0
receptor signaling protein tyrosine kinase signaling protein activity	8268	1	1	1	1	1	0	0	0
JAK pathway signal transduction adaptor activity	8269	1	1	1	1	1	0	0	0
zinc ion binding	8270	0.71484	0.19826	0.06823	0	193	191	17	32
sulfate porter activity	8271	0.68844	0.29328	0.13765	0.0093	6	6	50	3
calcium\, potassium\:sodium antiporter activity	8273	0.1575	1	0.48222	1	2	2	0	0
protein methyltransferase activity	8276	0.01458	0.15932	0.99718	1	3	3	33	1
sulfonylurea receptor activity	8281	1	1	1	1	1	0	0	0
lipid binding	8289	0.96036	0.59282	0	0.01136	73	73	14	10
calcium- and calmodulin-responsive adenylate cyclase activity	8294	1	1	1	1	1	0	0	0
3'-5'-exodeoxyribonuclease activity	8296	1	1	1	1	1	0	0	0
DNA bending activity	8301	0.63768	1	0.16617	1	2	2	0	0
structural constituent of muscle	8307	0.72049	0.37361	0.0002	0.0206	23	23	22	5
voltage-gated ion-selective channel activity	8308	0.72871	1	0.17399	1	2	2	0	0
double-stranded DNA specific exodeoxyribonuclease activity	8309	1	1	1	1	1	0	0	0
protein prenyltransferase activity	8318	0.1568	1	0.89241	1	6	6	0	0
protein carrier activity	8320	0.28899	1	0.72802	1	3	3	0	0
Ral guanyl-nucleotide exchange factor activity	8321	1	1	1	1	1	0	0	0
cation transporter activity	8324	0.92966	0.77379	0	0.10572	215	213	9	19
site-specific DNA-methyltransferase (cytosine-specific) activity	8326	1	1	1	1	1	0	0	0
methyl-CpG binding	8327	0.65096	1	0.11806	1	2	2	0	0
pattern recognition receptor activity	8329	0.90554	1	0.07091	1	3	3	0	0
protein tyrosine/threonine phosphatase activity	8330	0.28854	0.10926	0.91533	1	2	2	50	1
low voltage-gated calcium channel activity	8332	0.84542	1	0.09636	1	2	2	0	0
gamma-butyrobetaine dioxygenase activity	8336	1	0.05621	1	1	1	0	100	1
MP kinase activity	8339	0.51479	1	0.12232	1	2	2	0	0
kinetochore motor activity	8350	1	1	1	1	1	0	0	0
microtubule severing activity	8351	1	1	1	1	1	0	0	0
bacterial binding	8367	0.96593	1	0.07091	1	3	3	0	0
obsolete molecular function	8369	0.57734	0.02667	0.13576	0.00019	876	842	12	104
sialyltransferase activity	8373	0.99428	1	0.01809	0.20961	9	9	11	1
O-acyltransferase activity	8374	0.10269	0.07828	0.94294	1	41	41	12	5
acetylglucosaminyltransferase activity	8375	0.87527	1	0.23548	0.04292	13	13	15	2
acetylgalactosaminyltransferase activity	8376	0.6618	1	0.40076	1	4	4	0	0
galactosyltransferase activity	8378	0.96978	1	0.07986	0.00616	15	15	20	3
thioredoxin peroxidase activity	8379	0.0851	0.10926	0.9934	1	2	2	50	1
IkappaB kinase activity	8384	1	1	1	1	1	0	0	0
coumarin 7-hydroxylase activity	8389	0.6731	1	0.08239	1	5	5	0	0
arachidonic acid monooxygenase activity	8391	1	1	1	1	1	0	0	0
arachidonic acid epoxygenase activity	8392	1	1	1	1	1	0	0	0
fatty acid (omega-1)-hydroxylase activity	8393	0.85201	1	0.05113	1	3	3	0	0
steroid hydroxylase activity	8395	0.62514	1	0.35817	1	9	9	0	0
oxysterol 7-alpha-hydroxylase activity	8396	1	1	1	1	1	0	0	0
sterol 12-alpha-hydroxylase activity	8397	1	1	1	1	1	0	0	0
sterol 14-demethylase activity	8398	1	1	1	1	1	0	0	0
retinoic acid 4-hydroxylase activity	8401	1	0.05621	1	1	1	0	100	1
3'-5' exonuclease activity	8408	0.53578	1	0.51316	1	9	9	0	0
CoA-transferase activity	8410	0.69639	1	0.17583	1	2	2	0	0
acyltransferase activity	8415	0.47453	0.08937	0.96543	1	82	82	10	8
fucosyltransferase activity	8417	0.64769	1	0.21395	1	7	7	0	0
beta-glucosidase activity	8422	1	1	1	1	1	0	0	0
glycoprotein 6-alpha-L-fucosyltransferase activity	8424	1	1	1	1	1	0	0	0
protein kinase C inhibitor activity	8426	0.19375	1	0.52813	1	2	2	0	0
ribonuclease inhibitor activity	8428	0.41208	1	0.29875	1	2	2	0	0
phosphatidylethanolamine binding	8429	1	1	1	1	1	0	0	0
selenium binding	8430	0.99308	1	0.21065	0.12249	5	5	20	1
vitamin E binding	8431	1	0.05621	1	1	1	0	100	1
anticoagulant activity	8435	0.07224	0.15932	0.63158	1	3	3	33	1
heterogeneous nuclear ribonucleoprotein	8436	1	1	1	1	1	0	0	0
thyrotropin-releasing hormone activity	8437	1	1	1	1	1	0	0	0
inositol trisphosphate 3-kinase activity	8440	0.94701	1	0.20379	1	3	3	0	0
phosphofructokinase activity	8443	0.63708	1	0.73569	1	4	4	0	0
N-acetylglucosamine-6-phosphate deacetylase activity	8448	0.15828	1	0.76074	1	3	3	0	0
N-acetylglucosamine-6-sulfatase activity	8449	1	1	1	1	1	0	0	0
O-sialoglycoprotein endopeptidase activity	8450	1	1	1	1	1	0	0	0
X-Pro aminopeptidase activity	8451	1	1	1	1	1	0	0	0
RNA ligase activity	8452	0.00297	0.45288	0.96742	0.68365	44	44	9	4
alanine-glyoxylate transaminase activity	8453	1	1	1	1	1	0	0	0
alpha-1\,3-mannosylglycoprotein 4-beta-N-acetylglucosaminyltransferase activity	8454	0.91666	1	0.40217	1	2	2	0	0
alpha-1\,6-mannosylglycoprotein 2-beta-N-acetylglucosaminyltransferase activity	8455	1	1	1	1	1	0	0	0
alpha-N-acetylgalactosaminidase activity	8456	1	1	1	1	1	0	0	0
chondroitin 6-sulfotransferase activity	8459	0.72013	1	0.0799	1	2	2	0	0
dTDP-glucose 4\,6-dehydratase activity	8460	1	0.05621	1	1	1	0	100	1
gamma-glutamyl hydrolase activity	8464	1	0.05621	1	1	1	0	100	1
heparin-glucosamine 3-O-sulfotransferase activity	8467	0.84174	1	0.15267	1	4	4	0	0
ornithine cyclodeaminase activity	8473	1	1	1	1	1	0	0	0
palmitoyl-(protein) hydrolase activity	8474	1	1	1	1	1	0	0	0
procollagen-lysine 5-dioxygenase activity	8475	0.34143	1	0.91014	1	3	3	0	0
protein-tyrosine sulfotransferase activity	8476	1	1	1	1	1	0	0	0
queuine tRNA-ribosyltransferase activity	8479	1	1	1	1	1	0	0	0
sarcosine dehydrogenase activity	8480	1	1	1	1	1	0	0	0
transaminase activity	8483	0.69583	0.60382	0.62374	0.3418	16	16	13	2
sulfuric ester hydrolase activity	8484	0.29887	0.07051	0.97925	1	8	8	25	2
diphosphoinositol-polyphosphate diphosphatase activity	8486	0.72433	1	0.26705	1	3	3	0	0
gamma-glutamyl carboxylase activity	8488	1	1	1	1	1	0	0	0
cAMP generating peptide activity	8492	0.29818	0.10926	0.95201	1	2	2	50	1
tetracycline transporter activity	8493	0.06558	1	0.87452	1	3	3	0	0
translation activator activity	8494	1	1	1	1	1	0	0	0
UDP-galactose\:beta-N-acetylglucosamine beta-1\,3-galactosyltransferase activity	8499	0.70133	1	0.14644	0.09925	4	4	25	1
melatonin receptor activity	8502	0.94963	1	0.28393	1	2	2	0	0
benzodiazepine receptor activity	8503	0.86505	1	0.04433	1	5	5	0	0
monoamine transporter activity	8504	1	1	1	1	1	0	0	0
sucrose\:hydrogen symporter activity	8506	1	1	1	1	1	0	0	0
bile acid\:sodium symporter activity	8508	0.89458	1	0.40564	0.09925	4	4	25	1
anion transporter activity	8509	0.70151	0.08496	0.00078	0.00434	42	42	24	10
sodium\:bicarbonate symporter activity	8510	0.99994	1	0.1493	0.05092	2	2	50	1
sodium\:potassium\:chloride symporter activity	8511	1	0.05621	1	1	1	0	100	1
organic anion transporter activity	8514	0.41877	1	0.40641	1	3	3	0	0
folic acid transporter activity	8517	0.29482	1	0.91223	1	3	3	0	0
reduced folate carrier activity	8518	0.57647	1	0.96554	1	4	4	0	0
ammonium transporter activity	8519	0.69571	1	0.73997	1	2	2	0	0
sodium-dependent multivitamin transporter activity	8523	0.34521	0.10926	0.27672	0.05092	2	2	100	2
glucose 6-phosphate\:phosphate antiporter activity	8524	1	1	1	1	1	0	0	0
phosphatidylcholine transporter activity	8525	1	1	1	1	1	0	0	0
phosphatidylinositol transporter activity	8526	0.16094	1	0.62542	1	2	2	0	0
taste receptor activity	8527	0.05561	0.33301	0.95549	1	7	7	14	1
peptide receptor activity\, G-protein coupled	8528	0.40557	1	0.57648	1	3	3	0	0
riboflavin kinase activity	8531	1	1	1	1	1	0	0	0
N-acetyllactosaminide beta-1\,3-N-acetylglucosaminyltransferase activity	8532	1	1	1	1	1	0	0	0
astacin activity	8533	0.92537	1	0.10101	0.00385	4	4	50	2
purine-specific oxidized base lesion DNA N-glycosylase activity	8534	1	1	1	1	1	0	0	0
Ran GTPase binding	8536	0.11383	0.20658	0.97926	1	4	4	25	1
proteasome activator activity	8538	0.10115	1	0.76378	1	2	2	0	0
protein-synthesizing GTPase activity	8547	0.10221	1	0.89951	1	7	7	0	0
hydrogen-exporting ATPase activity\, phosphorylative mechanism	8553	0.02801	0.05489	0.99999	1	7	7	29	2
sodium-exporting ATPase activity\, phosphorylative mechanism	8554	1	1	1	1	1	0	0	0
protein transporter activity	8565	0.00055	0.75429	0.15752	1	111	110	5	5
dynein ATPase activity	8567	0.58616	1	0.22673	1	3	3	0	0
microtubule-severing ATPase activity	8568	1	1	1	1	1	0	0	0
myosin ATPase activity	8570	0.60213	0.72008	0.48802	0.43739	22	22	9	2
non-chaperonin molecular chaperone ATPase activity	8571	1	1	1	1	1	0	0	0
peroxisome-assembly ATPase activity	8573	0.41988	1	0.75466	1	2	2	0	0
proteasome ATPase activity	8575	1	1	1	1	1	0	0	0
vesicle-fusing ATPase activity	8576	1	1	1	1	1	0	0	0
ubiquitin-specific protease 5 activity	8581	1	1	1	1	1	0	0	0
protein phosphatase type 1 regulator activity	8599	0.06539	1	0.86921	1	2	2	0	0
protein phosphatase type 2A regulator activity	8601	0.32773	1	0.47926	1	3	3	0	0
cAMP-dependent protein kinase regulator activity	8603	0.3462	0.0407	0.88813	1	6	6	33	2
protein kinase CK2 regulator activity	8605	0.76176	1	0.36543	1	2	2	0	0
phosphorylase kinase regulator activity	8607	1	1	1	1	1	0	0	0
diuretic hormone activity	8613	1	1	1	1	1	0	0	0
small protein conjugating enzyme activity	8639	0.01333	0.19183	0.994	1	27	27	11	3
small protein activating enzyme activity	8641	0.42411	1	0.75553	1	4	4	0	0
ubiquitin-like activating enzyme activity	8642	1	1	1	1	1	0	0	0
tachykinin	8648	0.54952	1	0.56661	1	3	3	0	0
rRNA methyltransferase activity	8649	0.70699	1	0.57514	1	4	4	0	0
actin polymerizing activity	8651	0.13431	1	0.35517	1	3	3	0	0
caspase activator activity	8656	0.07623	1	0.88994	1	2	2	0	0
2\,3-dihydro-2\,3-dihydroxybenzoate dehydrogenase activity	8667	0.5278	0.1841	0.42077	0.04924	14	14	29	4
7-alpha-hydroxysteroid dehydrogenase activity	8709	1	1	1	1	1	0	0	0
D-alanyl-D-alanine endopeptidase activity	8717	1	1	1	1	1	0	0	0
N-acetylmuramoyl-L-alanine amidase activity	8745	0.85517	1	0.01541	1	5	5	0	0
NAD(P) transhydrogenase activity	8746	1	1	1	1	1	0	0	0
S-adenosylmethionine-dependent methyltransferase activity	8757	0.00172	0.69515	0.8312	0.22166	63	63	10	6
UDP-N-acetylglucosamine 2-epimerase activity	8761	1	1	1	1	1	0	0	0
acyl-CoA thioesterase II activity	8778	1	1	1	1	1	0	0	0
N-acylneuraminate cytidylyltransferase activity	8781	1	1	1	1	1	0	0	0
agmatinase activity	8783	1	1	1	1	1	0	0	0
alkyl hydroperoxide reductase activity	8785	1	1	1	1	1	0	0	0
arsenate reductase (glutaredoxin) activity	8794	1	1	1	1	1	0	0	0
cob(I)yrinic acid a\,c-diamide adenosyltransferase activity	8817	1	1	1	1	1	0	0	0
dTDP-4-dehydrorhamnose reductase activity	8831	1	1	1	1	1	0	0	0
glycerophosphodiester phosphodiesterase activity	8889	0.99931	1	0.04994	0.0754	3	3	33	1
glycine C-acetyltransferase activity	8890	1	1	1	1	1	0	0	0
homocysteine S-methyltransferase activity	8898	0.59003	1	0.3065	0.05092	2	2	50	1
hydrogen\:potassium-exchanging ATPase activity	8900	0.44085	1	0.44766	1	3	3	0	0
ferredoxin hydrogenase activity	8901	0.75006	1	0.41749	1	2	2	0	0
ferredoxin reductase activity	8937	1	1	1	1	1	0	0	0
glyceraldehyde-3-phosphate dehydrogenase activity	8943	1	1	1	1	1	0	0	0
phosphohistidine phosphatase activity	8969	1	1	1	1	1	0	0	0
pitrilysin activity	8975	1	1	1	1	1	0	0	0
selenocysteine lyase activity	9000	0.06375	1	0.96333	1	2	2	0	0
DNA-methyltransferase activity	9008	0.00489	1	0.92771	1	3	3	0	0
electron donor activity	9053	1	1	1	1	1	0	0	0
electron carrier activity	9055	0.2355	1	0.39283	1	6	6	0	0
biotin binding	9374	0.53012	0.25119	0.69808	0.12249	5	5	40	2
N-acylmannosamine kinase activity	9384	1	1	1	1	1	0	0	0
2Fe-2S electron transfer carrier	9492	1	1	1	1	1	0	0	0
low affinity phosphate transporter activity	9673	1	1	1	1	1	0	0	0
cyclase activity	9975	0.58582	1	0.16167	1	8	8	0	0
heme-copper terminal oxidase activity	15002	0.72863	1	0.09707	1	12	12	0	0
galactosylgalactosylxylosylprotein 3-beta-glucuronosyltransferase activity	15018	1	1	1	1	1	0	0	0
glucuronosyltransferase activity	15020	0.7908	0.20495	0.00647	3e-05	15	15	47	7
GPI-anchored membrane-bound receptor	15025	1	1	1	1	1	0	0	0
coreceptor activity	15026	0.7283	1	0.49207	0.32436	15	15	7	1
internalization receptor activity	15029	0.34664	1	0.23196	1	2	2	0	0
cytochrome P450 activity	15034	0.97762	1	0.23289	1	3	3	0	0
protein disulfide oxidoreductase activity	15035	0.96593	1	0.12067	1	3	3	0	0
disulfide oxidoreductase activity	15036	0.87517	1	0.11445	1	13	13	0	0
peptide disulfide oxidoreductase activity	15037	0.48791	1	0.59599	1	2	2	0	0
glutathione disulfide oxidoreductase activity	15038	0.48791	1	0.59599	1	2	2	0	0
X-opioid receptor activity	15051	1	1	1	1	1	0	0	0
beta3-adrenergic receptor activity	15052	1	1	1	1	1	0	0	0
gastrin receptor activity	15054	1	1	1	1	1	0	0	0
corticotrophin-releasing factor receptor activity	15056	1	1	1	1	1	0	0	0
thrombin receptor activity	15057	0.80933	1	0.03488	1	5	5	0	0
amidinotransferase activity	15067	1	1	1	1	1	0	0	0
glycine amidinotransferase activity	15068	1	1	1	1	1	0	0	0
toxin activity	15070	0.43376	0.24727	0.21068	0.35879	17	17	18	3
protein phosphatase type 2C activity	15071	0.30844	1	0.27037	1	5	5	0	0
ion transporter activity	15075	0.8606	0.48371	0	0.00128	311	307	12	36
monovalent inorganic cation transporter activity	15077	0.59208	0.84315	0.35364	0.5669	32	32	6	2
hydrogen ion transporter activity	15078	0.33035	0.81338	0.414	1	29	29	3	1
potassium ion transporter activity	15079	1	1	1	1	1	0	0	0
di-\, tri-valent inorganic cation transporter activity	15082	0.1334	0.01152	0.45297	1	9	9	33	3
calcium ion transporter activity	15085	1	1	1	1	1	0	0	0
cobalt ion transporter activity	15087	0.47637	0.15932	0.63876	1	3	3	33	1
magnesium ion transporter activity	15095	1	0.05621	1	1	1	0	100	1
organic cation transporter activity	15101	0.38499	1	0.07948	1	6	6	0	0
inorganic anion transporter activity	15103	0.69793	0.12339	0.00826	0.00221	22	22	32	7
iodide transporter activity	15111	1	1	1	1	1	0	0	0
phosphate transporter activity	15114	0.81397	1	0.02652	1	5	5	0	0
sulfate transporter activity	15116	1	1	1	0.02579	1	0	100	1
bile acid transporter activity	15125	1	1	1	1	1	0	0	0
lactate transporter activity	15129	1	1	1	1	1	0	0	0
mevalonate transporter activity	15130	1	1	1	1	1	0	0	0
citrate transporter activity	15137	1	1	1	1	1	0	0	0
tricarboxylic acid transporter activity	15142	1	1	1	1	1	0	0	0
carbohydrate transporter activity	15144	0.30291	0.79045	0.27769	0.15307	27	27	11	3
monosaccharide transporter activity	15145	0.58284	1	0.39402	0.14513	6	6	17	1
hexose transporter activity	15149	0.58284	1	0.39402	0.14513	6	6	17	1
rhamnose transporter activity	15153	1	1	1	1	1	0	0	0
pyrimidine nucleotide sugar transporter activity	15165	0.09531	1	0.60325	1	4	4	0	0
polyol transporter activity	15166	1	1	1	1	1	0	0	0
glycerol transporter activity	15168	1	1	1	1	1	0	0	0
amino acid transporter activity	15171	0.45579	0.81338	0.50163	0.53153	29	29	7	2
acidic amino acid transporter activity	15172	0.38028	1	0.73031	1	3	3	0	0
basic amino acid transporter activity	15174	0.07684	1	0.9323	1	2	2	0	0
neutral amino acid transporter activity	15175	0.11889	1	0.63387	1	3	3	0	0
L-amino acid transporter activity	15179	1	1	1	1	1	0	0	0
L-cystine transporter activity	15184	0.91065	1	0.27282	0.05092	2	2	50	1
L-serine transporter activity	15194	1	1	1	1	1	0	0	0
peptide transporter activity	15197	0.15756	1	0.60138	1	5	5	0	0
oligopeptide transporter activity	15198	0.30976	1	0.72433	1	3	3	0	0
urea transporter activity	15204	1	0.05621	1	1	1	0	100	1
purine nucleoside transporter activity	15211	1	1	1	1	1	0	0	0
choline transporter activity	15220	0.98495	1	0.11606	1	2	2	0	0
serotonin transporter activity	15222	1	1	1	0.02579	1	0	100	1
heme transporter activity	15232	0.46855	1	0.74932	1	2	2	0	0
thiamin transporter activity	15234	0.73894	1	0.66814	1	2	2	0	0
cobalamin transporter activity	15235	1	1	1	1	1	0	0	0
drug transporter activity	15238	0.61709	1	0.09033	1	2	2	0	0
fatty acid transporter activity	15245	1	1	1	1	1	0	0	0
sterol transporter activity	15248	0.36535	1	0.37153	1	2	2	0	0
water channel activity	15250	0.5798	0.40591	0.13508	0.20961	9	9	22	2
glycerol channel activity	15254	1	1	1	1	1	0	0	0
channel or pore class transporter activity	15267	0.96186	0.86988	0	0.00526	197	195	10	20
alpha-type channel activity	15268	0.95717	0.82682	0	0.00911	186	184	10	19
calcium-activated potassium channel activity	15269	0.63897	1	0.22312	1	3	3	0	0
dihydropyridine-sensitive calcium channel activity	15270	0.64415	1	0.32195	1	2	2	0	0
ATP-activated inward rectifier potassium channel activity	15272	0.90012	1	0.39292	1	2	2	0	0
ligand-gated ion channel activity	15276	0.80677	1	0.07406	1	2	2	0	0
kainate selective glutamate receptor activity	15277	0.94016	1	0.00516	1	3	3	0	0
store-operated calcium channel activity	15279	0.90944	1	0.06679	1	5	5	0	0
amiloride-sensitive sodium channel activity	15280	0.44366	1	0.46702	1	3	3	0	0
nonselective cation channel activity	15281	1	1	1	1	1	0	0	0
connexon channel activity	15285	0.60844	1	0.57121	1	10	10	0	0
porin activity	15288	0.93707	1	0.28105	1	8	8	0	0
electrochemical potential-driven transporter activity	15290	0.85142	0.5818	0.06823	0.01065	72	72	14	10
porter activity	15291	0.82161	0.54777	0.04578	0.00871	69	69	14	10
symporter activity	15293	0.84797	0.32977	0.06084	0.06508	36	36	17	6
antiporter activity	15297	0.83542	1	0.0802	0.23	10	10	10	1
solute\:hydrogen antiporter activity	15299	0.82831	1	0.22515	1	2	2	0	0
solute\:solute antiporter activity	15300	0.44245	1	0.35819	1	2	2	0	0
phosphate carrier activity	15320	1	1	1	1	1	0	0	0
sodium-dependent phosphate transporter activity	15321	0.87762	1	0.10005	1	3	3	0	0
thyroid hormone transporter activity	15349	1	1	1	1	1	0	0	0
methotrexate transporter activity	15350	1	1	1	1	1	0	0	0
monocarboxylate porter activity	15355	0.8612	1	0.24713	1	2	2	0	0
amino acid permease activity	15359	0.11889	1	0.90575	1	3	3	0	0
low affinity sodium\:dicarboxylate symporter activity	15361	1	1	1	1	1	0	0	0
oxoglutarate\:malate antiporter activity	15367	1	1	1	1	1	0	0	0
glycine\:sodium symporter activity	15375	1	1	1	1	1	0	0	0
cation\:chloride symporter activity	15377	0.20617	0.15932	0.96054	1	3	3	33	1
potassium\:chloride symporter activity	15379	0.68943	1	0.29577	1	3	3	0	0
anion exchanger activity	15380	0.56199	0.20658	0.195	1	4	4	25	1
sodium\:hydrogen antiporter activity	15385	0.70966	1	0.46216	1	4	4	0	0
primary active transporter activity	15399	0.02405	1	0.9451	1	7	7	0	0
P-P-bond-hydrolysis-driven transporter activity	15405	0.02405	1	0.9451	1	7	7	0	0
bile acid-exporting ATPase activity	15432	1	1	1	1	1	0	0	0
peptide antigen-transporting ATPase activity	15433	0.27954	1	0.61627	1	3	3	0	0
peptide-transporting ATPase activity	15440	0.27954	1	0.61627	1	3	3	0	0
protein translocase activity	15450	0.02405	1	0.9451	1	7	7	0	0
auxiliary transport protein activity	15457	0.99233	1	0.21081	0.43739	22	22	5	1
potassium channel regulator activity	15459	0.99707	1	0.06899	0.18867	8	8	13	1
acetylcholine receptor activity	15464	0.98081	0.5006	0.1012	0.26923	12	12	17	2
G-protein activated inward rectifier potassium channel activity	15467	0.88334	1	0.52597	1	2	2	0	0
cholesterol binding	15485	0.36535	1	0.37153	1	2	2	0	0
tetracycline\:hydrogen antiporter activity	15520	0.06558	1	0.87452	1	3	3	0	0
tubulin binding	15631	0.43999	0.47084	0.9279	1	11	11	9	1
bacteriolytic toxin activity	15642	1	1	1	1	1	0	0	0
toxin binding	15643	1	1	1	1	1	0	0	0
fatty-acid ligase activity	15645	0.17637	0.20658	0.99593	1	4	4	25	1
ATPase activity\, coupled to transmembrane movement of ions\, phosphorylative mechanism	15662	0.19308	0.5006	0.49372	0.26923	12	12	17	2
alcohol transporter activity	15665	1	1	1	1	1	0	0	0
mannosidase activity	15923	0.25423	1	0.72461	1	4	4	0	0
mannosyl-oligosaccharide mannosidase activity	15924	0.05409	1	0.77892	1	3	3	0	0
galactosidase activity	15925	0.26162	1	0.62302	1	7	7	0	0
glucosidase activity	15926	0.86884	1	0.15632	0.0128	7	7	29	2
trehalase activity	15927	0.99425	1	0.06456	1	3	3	0	0
fucosidase activity	15928	1	1	1	1	1	0	0	0
hexosaminidase activity	15929	0.27244	1	0.81456	1	8	8	0	0
nucleobase\, nucleoside\, nucleotide and nucleic acid transporter activity	15932	0.18592	1	0.70776	1	5	5	0	0
phospholipase activator activity	16004	1	1	1	1	1	0	0	0
phospholipase A2 activator activity	16005	1	1	1	1	1	0	0	0
cyclosporin A binding	16018	1	1	1	1	1	0	0	0
peptidoglycan receptor activity	16019	0.90554	1	0.07091	1	3	3	0	0
maleylacetoacetate isomerase activity	16034	1	1	1	1	1	0	0	0
urocanate hydratase activity	16153	1	1	1	1	1	0	0	0
formyltetrahydrofolate dehydrogenase activity	16155	1	1	1	1	1	0	0	0
lipoxygenase activity	16165	0.91004	1	0.15062	1	5	5	0	0
glial cell line-derived neurotrophic factor receptor activity	16167	1	1	1	1	1	0	0	0
NAD(P)H oxidase activity	16174	0.77402	1	0.60218	1	2	2	0	0
superoxide-generating NADPH oxidase activity	16175	1	0.05621	1	1	1	0	100	1
AMP binding	16208	0.45109	0.29328	0.36467	1	6	6	17	1
antioxidant activity	16209	0.69172	0.86031	0.591	0.05661	34	34	12	4
ammonia ligase activity	16211	0.95289	1	0.03835	1	2	2	0	0
CoA desaturase activity	16215	1	1	1	1	1	0	0	0
steroid dehydrogenase activity	16229	0.68192	0.12403	0.03405	0.00013	11	11	55	6
sphingomyelin phosphodiesterase activator activity	16230	1	1	1	1	1	0	0	0
channel regulator activity	16247	0.99233	1	0.21081	0.43739	22	22	5	1
channel inhibitor activity	16248	0.67064	1	0.49653	1	14	14	0	0
N-sulfoglucosamine sulfohydrolase activity	16250	1	1	1	1	1	0	0	0
general RNA polymerase II transcription factor activity	16251	0.30284	1	0.56035	1	20	20	0	0
glycoprotein-N-acetylgalactosamine 3-beta-galactosyltransferase activity	16263	1	1	1	1	1	0	0	0
arginine N-methyltransferase activity	16273	1	0.05621	1	1	1	0	100	1
protein-arginine N-methyltransferase activity	16274	1	0.05621	1	1	1	0	100	1
small conductance calcium-activated potassium channel activity	16286	0.63897	1	0.22312	1	3	3	0	0
CoA hydrolase activity	16289	0.89191	1	0.40232	1	4	4	0	0
palmitoyl-CoA hydrolase activity	16290	0.93911	1	0.40906	1	2	2	0	0
acyl-CoA thioesterase activity	16291	0.93911	1	0.40906	1	2	2	0	0
acyl-[acyl-carrier protein] hydrolase activity	16297	1	1	1	1	1	0	0	0
lipase activity	16298	0.95747	1	1e-05	0.62984	38	38	3	1
regulator of G-protein signaling activity	16299	1	1	1	1	1	0	0	0
kinase activity	16301	0.37181	0.05683	0.80844	0.54386	348	343	10	36
phosphatidylinositol 3-kinase activity	16303	0.98744	1	0.10209	1	3	3	0	0
phosphatidylinositol phosphate kinase activity	16307	0.85577	1	0.27632	1	5	5	0	0
1-phosphatidylinositol-4-phosphate 5-kinase activity	16308	0.64304	1	0.487	1	4	4	0	0
inositol bisphosphate phosphatase activity	16312	1	1	1	1	1	0	0	0
apoptosis regulator activity	16329	0.11331	0.29844	0.82405	1	34	34	9	3
cytoskeletal anchoring activity	16343	0.72493	1	0.39416	1	2	2	0	0
dimethylargininase activity	16403	1	1	1	1	1	0	0	0
15-hydroxyprostaglandin dehydrogenase (NAD+) activity	16404	1	1	1	0.02579	1	0	100	1
CoA-ligase activity	16405	0.83589	1	0.04969	1	2	2	0	0
carnitine O-acyltransferase activity	16406	0.76968	1	0.2242	1	2	2	0	0
acetyltransferase activity	16407	0.65665	1	0.23287	1	16	16	0	0
C-acyltransferase activity	16408	0.79963	1	0.6506	1	3	3	0	0
palmitoyltransferase activity	16409	0.70762	1	0.67395	1	2	2	0	0
N-acyltransferase activity	16410	0.69062	1	0.02779	1	14	14	0	0
acylglycerol O-acyltransferase activity	16411	0.20694	1	0.80975	1	2	2	0	0
S-acyltransferase activity	16417	0.14666	1	0.49117	1	2	2	0	0
S-malonyltransferase activity	16419	1	1	1	1	1	0	0	0
CoA carboxylase activity	16421	0.53012	1	0.69808	0.12249	5	5	20	1
mRNA (2'-O-methyladenosine-N6-)-methyltransferase activity	16422	1	1	1	1	1	0	0	0
C-acetyltransferase activity	16453	1	1	1	1	1	0	0	0
C-palmitoyltransferase activity	16454	1	1	1	1	1	0	0	0
RNA polymerase II transcription mediator activity	16455	0.77109	1	0.60955	1	8	8	0	0
pyrophosphatase activity	16462	0.00063	0.22835	0.97235	1	135	134	7	10
immunoglobulin receptor activity	16489	0.95618	1	0.03545	1	2	2	0	0
oxidoreductase activity	16491	0.50538	0.01255	0.30132	0.01833	346	341	13	46
neurotensin receptor activity\, G-protein coupled	16492	0.98664	1	0.05697	1	2	2	0	0
C-C chemokine receptor activity	16493	0.3224	1	0.30486	1	27	27	0	0
C-X-C chemokine receptor activity	16494	0.46768	1	0.33101	0.40717	20	20	5	1
orexin receptor activity	16499	0.98631	1	0.31112	1	2	2	0	0
pheromone receptor activity	16503	0.98402	1	0.04791	1	2	2	0	0
protease activator activity	16504	0.02639	1	0.84818	1	3	3	0	0
apoptotic protease activator activity	16505	0.02639	1	0.84818	1	3	3	0	0
apoptosis activator activity	16506	0.81883	1	0.0391	1	7	7	0	0
interleukin-12 receptor activity	16517	1	1	1	1	1	0	0	0
growth hormone-releasing hormone receptor activity	16520	0.9695	1	0.15882	1	2	2	0	0
latrotoxin receptor activity	16524	0.88714	1	0.55908	1	4	4	0	0
G-protein coupled receptor activity\, unknown ligand	16526	0.82555	1	0.26538	1	13	13	0	0
brain-specific angiogenesis inhibitor activity	16527	1	1	1	1	1	0	0	0
cyclin-dependent protein kinase 5 activator activity	16534	1	1	1	1	1	0	0	0
cyclin-dependent protein kinase regulator activity	16538	0.59911	0.60382	0.75709	1	16	16	6	1
transcriptional activator activity	16563	0.23574	0.74396	0.45585	0.90274	89	89	6	5
transcriptional repressor activity	16564	0.18932	0.74347	0.7309	0.52664	68	68	7	5
specific transcriptional repressor activity	16566	0.31399	1	0.6016	1	4	4	0	0
glycine binding	16594	1	1	1	1	1	0	0	0
amino acid binding	16597	0.42678	0.29328	0.63488	1	6	6	17	1
glutaminyl-peptide cyclotransferase activity	16603	1	0.05621	1	1	1	0	100	1
oxidoreductase activity\, acting on CH-OH group of donors	16614	0.99936	0.85167	0.06344	0.00013	59	59	17	10
oxidoreductase activity\, acting on the CH-OH group of donors\, NAD or NADP as acceptor	16616	0.99938	0.83784	0.0538	0.0001	57	57	18	10
oxidoreductase activity\, acting on the aldehyde or oxo group of donors\, NAD or NADP as acceptor	16620	0.86491	0.40591	0.35238	1	9	9	11	1
oxidoreductase activity\, acting on the aldehyde or oxo group of donors\, oxygen as acceptor	16623	1	1	1	1	1	0	0	0
oxidoreductase activity\, acting on the aldehyde or oxo group of donors\, disulfide as acceptor	16624	0.73749	1	0.16793	1	4	4	0	0
oxidoreductase activity\, acting on the CH-CH group of donors	16627	0.29645	0.47207	0.79748	0.16218	28	28	14	4
oxidoreductase activity\, acting on the CH-CH group of donors\, NAD or NADP as acceptor	16628	0.61297	0.24727	0.53354	0.06997	17	17	24	4
oxidoreductase activity\, acting on the CH-CH group of donors\, oxygen as acceptor	16634	0.05686	1	0.89978	1	3	3	0	0
oxidoreductase activity\, acting on the CH-CH group of donors\, quinone or related compound as acceptor	16635	1	1	1	1	1	0	0	0
oxidoreductase activity\, acting on the CH-NH2 group of donors	16638	0.60822	1	0.11613	0.14513	6	6	17	1
oxidoreductase activity\, acting on the CH-NH2 group of donors\, oxygen as acceptor	16641	0.46463	1	0.28325	0.12249	5	5	20	1
oxidoreductase activity\, acting on the CH-NH2 group of donors\, disulfide as acceptor	16642	1	1	1	1	1	0	0	0
oxidoreductase activity\, acting on the CH-NH group of donors	16645	0.54022	1	0.57206	1	14	14	0	0
oxidoreductase activity\, acting on the CH-NH group of donors\, NAD or NADP as acceptor	16646	0.53389	1	0.77648	1	10	10	0	0
oxidoreductase activity\, acting on the CH-NH group of donors\, quinone or similar compound as acceptor	16649	0.35896	1	0.42296	1	3	3	0	0
oxidoreductase activity\, acting on NADH or NADPH	16651	0.07202	0.52651	0.89353	1	31	31	6	2
oxidoreductase activity\, acting on NADH or NADPH\, NAD or NADP as acceptor	16652	1	1	1	1	1	0	0	0
oxidoreductase activity\, acting on NADH or NADPH\, disulfide as acceptor	16654	1	1	1	1	1	0	0	0
oxidoreductase activity\, acting on NADH or NADPH\, quinone or similar compound as acceptor	16655	0.18872	1	0.93572	1	4	4	0	0
oxidoreductase activity\, acting on NADH or NADPH\, nitrogenous group as acceptor	16657	1	1	1	1	1	0	0	0
oxidoreductase activity\, acting on sulfur group of donors	16667	1	1	1	1	1	0	0	0
oxidoreductase activity\, acting on sulfur group of donors\, disulfide as acceptor	16671	1	1	1	1	1	0	0	0
oxidoreductase activity\, acting on peroxide as acceptor	16684	0.4237	0.81338	0.84011	0.53153	29	29	7	2
oxidoreductase activity\, acting on hydrogen as donor	16695	0.75006	1	0.41749	1	2	2	0	0
oxidoreductase activity\, acting on hydrogen as donor\, iron-sulfur protein as acceptor	16699	0.75006	1	0.41749	1	2	2	0	0
oxidoreductase activity\, acting on single donors with incorporation of molecular oxygen	16701	0.69468	0.3321	0.27924	1	21	21	10	2
oxidoreductase activity\, acting on single donors with incorporation of molecular oxygen\, incorporation of two atoms of oxygen	16702	0.70641	0.31104	0.37207	1	20	20	10	2
oxidoreductase activity\, acting on paired donors\, with incorporation or reduction of molecular oxygen	16705	0.3154	0.00989	0.14841	0.31238	76	76	17	13
oxidoreductase activity\, acting on paired donors\, with incorporation or reduction of molecular oxygen\, 2-oxoglutarate as one donor\, and incorporation of one atom each of oxygen into both donors	16706	0.12546	0.07051	0.99291	1	8	8	25	2
oxidoreductase activity\, acting on paired donors\, with incorporation or reduction of molecular oxygen\, NAD or NADH as one donor\, and incorporation of one atom of oxygen	16709	0.26134	0.41403	0.60951	1	25	25	8	2
oxidoreductase activity\, acting on paired donors\, with incorporation or reduction of molecular oxygen\, reduced flavin or flavoprotein as one donor\, and incorporation of one atom of oxygen	16712	0.54927	0.12339	0.02226	0.01825	22	22	27	6
oxidoreductase activity\, acting on paired donors\, with incorporation or reduction of molecular oxygen\, reduced iron-sulfur protein as one donor\, and incorporation of one atom of oxygen	16713	0.85201	1	0.32631	1	3	3	0	0
oxidoreductase activity\, acting on paired donors\, with incorporation or reduction of molecular oxygen\, reduced pteridine as one donor\, and incorporation of one atom of oxygen	16714	0.59707	0.20658	0.06844	1	4	4	25	1
oxidoreductase activity\, acting on paired donors\, with incorporation or reduction of molecular oxygen\, reduced ascorbate as one donor\, and incorporation of one atom of oxygen	16715	0.71087	1	0.48777	1	3	3	0	0
oxidoreductase activity\, acting on superoxide radicals as acceptor	16721	0.06086	0.01152	0.7952	1	9	9	33	3
oxidoreductase activity\, acting on CH2 groups	16725	0.47355	0.20658	0.13661	0.09925	4	4	50	2
oxidoreductase activity\, acting on CH2 groups\, NAD or NADP as acceptor	16726	0.99729	1	0.00842	0.05092	2	2	50	1
oxidoreductase activity\, acting on CH2 groups\, oxygen as acceptor	16727	1	1	1	0.02579	1	0	100	1
oxidoreductase activity\, acting on CH2 groups\, disulfide as acceptor	16728	0.04197	0.10926	0.99336	1	2	2	50	1
transferase activity	16740	0.1859	0.21659	0.79889	0.0475	776	749	10	77
transferase activity\, transferring one-carbon groups	16741	0.00014	0.86343	0.77005	0.17674	85	85	8	7
hydroxymethyl-\, formyl- and related transferase activity	16742	1	1	1	1	1	0	0	0
carboxyl- and carbamoyltransferase activity	16743	0.46001	1	0.94982	1	3	3	0	0
transferase activity\, transferring aldehyde or ketonic groups	16744	0.59246	1	0.84798	1	5	5	0	0
transferase activity\, transferring acyl groups	16746	0.54763	0.03773	0.9558	1	81	81	11	9
transferase activity\, transferring groups other than amino-acyl groups	16747	0.54383	0.34543	0.26461	1	37	37	8	3
transferase activity\, transferring amino-acyl groups	16755	0.36654	0.0266	0.69551	1	12	12	25	3
transferase activity\, transferring glycosyl groups	16757	0.94592	0.9686	0.02955	0	92	92	15	14
transferase activity\, transferring hexosyl groups	16758	0.98212	0.83049	0.00421	0	56	56	23	13
transferase activity\, transferring pentosyl groups	16763	0.1502	1	0.78282	1	14	14	0	0
transferase activity\, transferring alkyl or aryl (other than methyl) groups	16765	0.48209	1	0.12717	0.60995	36	36	3	1
transferase activity\, transferring nitrogenous groups	16769	0.73625	0.6261	0.3874	0.35879	17	17	12	2
transferase activity\, transferring phosphorus-containing groups	16772	0.13406	0.04721	0.98926	0.78402	387	380	10	38
phosphotransferase activity\, alcohol group as acceptor	16773	0.50036	0.06468	0.19933	0.71767	232	230	10	24
phosphotransferase activity\, carboxyl group as acceptor	16774	0.69052	1	0.40863	1	2	2	0	0
phosphotransferase activity\, nitrogenous group as acceptor	16775	0.45108	0.15932	0.37874	1	3	3	33	1
phosphotransferase activity\, phosphate group as acceptor	16776	0.1377	0.1841	0.99987	1	14	14	14	2
diphosphotransferase activity	16778	0.00351	0.20658	0.99199	1	4	4	25	1
nucleotidyltransferase activity	16779	0.01116	0.37377	0.97127	1	55	55	7	4
phosphotransferase activity\, for other substituted phosphate groups	16780	0.10128	1	0.62542	1	2	2	0	0
phosphotransferase activity\, paired acceptors	16781	0.13253	1	0.94314	1	2	2	0	0
transferase activity\, transferring sulfur-containing groups	16782	0.80206	0.31409	0.01254	0.5996	35	35	11	4
sulfurtransferase activity	16783	1	1	1	1	1	0	0	0
3-mercaptopyruvate sulfurtransferase activity	16784	1	1	1	1	1	0	0	0
hydrolase activity	16787	0.1063	0.13759	0.91954	0.75714	842	810	9	74
hydrolase activity\, acting on ester bonds	16788	0.53301	0.92987	0.06691	0.9782	219	217	5	10
carboxylic ester hydrolase activity	16789	0.58238	1	0.00321	1	21	21	0	0
thiolester hydrolase activity	16790	0.89853	1	0.44297	1	6	6	0	0
phosphoric monoester hydrolase activity	16791	0.39243	0.67712	0.91487	1	101	101	5	5
hydrolase activity\, acting on glycosyl bonds	16798	0.61403	1	0.3434	0.22166	63	63	5	3
hydrolase activity\, hydrolyzing N-glycosyl compounds	16799	0.04729	1	0.71579	1	6	6	0	0
hydrolase activity\, acting on ether bonds	16801	0.40479	1	0.88128	1	5	5	0	0
trialkylsulfonium hydrolase activity	16802	1	1	1	1	1	0	0	0
ether hydrolase activity	16803	0.73709	1	0.61604	1	4	4	0	0
dipeptidase activity	16805	0.28481	0.10926	0.27589	0.05092	2	2	100	2
dipeptidyl-peptidase and tripeptidyl-peptidase activity	16806	0.28481	0.10926	0.6273	1	2	2	50	1
hydrolase activity\, acting on carbon-nitrogen (but not peptide) bonds	16810	0.61066	0.94474	0.64304	0.13816	50	50	8	4
hydrolase activity\, acting on carbon-nitrogen (but not peptide) bonds\, in linear amides	16811	0.47816	1	0.38847	0.42248	21	21	5	1
hydrolase activity\, acting on carbon-nitrogen (but not peptide) bonds\, in cyclic amides	16812	0.41585	1	0.79209	1	7	7	0	0
hydrolase activity\, acting on carbon-nitrogen (but not peptide) bonds\, in linear amidines	16813	0.54631	0.29328	0.63616	0.14513	6	6	33	2
hydrolase activity\, acting on carbon-nitrogen (but not peptide) bonds\, in cyclic amidines	16814	0.35398	1	0.81926	0.24987	11	11	9	1
hydrolase activity\, acting on carbon-nitrogen (but not peptide) bonds\, in nitriles	16815	1	1	1	1	1	0	0	0
hydrolase activity\, acting on carbon-nitrogen (but not peptide) bonds\, in other compounds	16816	1	1	1	1	1	0	0	0
hydrolase activity\, acting on acid anhydrides	16817	0.001	0.22835	0.97235	1	135	134	7	10
hydrolase activity\, acting on acid anhydrides\, in phosphorus-containing anhydrides	16818	0.00134	0.13917	0.98121	1	91	91	9	8
hydrolase activity\, acting on acid carbon-carbon bonds	16822	1	1	1	1	1	0	0	0
hydrolase activity\, acting on acid carbon-carbon bonds\, in ketonic substances	16823	1	1	1	1	1	0	0	0
hydrolase activity\, acting on acid sulfur-nitrogen bonds	16826	1	1	1	1	1	0	0	0
lyase activity	16829	0.47756	0.25482	0.53606	0.01368	76	76	16	12
carbon-carbon lyase activity	16830	0.85005	1	0.21376	0.32436	15	15	7	1
carboxy-lyase activity	16831	0.91277	1	0.23258	0.24987	11	11	9	1
aldehyde-lyase activity	16832	0.50363	1	0.71949	1	2	2	0	0
carbon-oxygen lyase activity	16835	0.26758	0.09378	0.37981	0.00793	31	31	26	8
hydro-lyase activity	16836	0.19492	0.06949	0.33717	0.00548	28	28	29	8
carbon-nitrogen lyase activity	16840	0.45858	1	0.65443	1	4	4	0	0
ammonia-lyase activity	16841	0.79885	1	0.32836	1	2	2	0	0
amidine-lyase activity	16842	0.22179	1	0.92257	1	2	2	0	0
carbon-sulfur lyase activity	16846	0.20801	0.14352	0.88108	0.26923	12	12	25	3
1-aminocyclopropane-1-carboxylate synthase activity	16847	0.93024	1	0.14198	0.09925	4	4	25	1
phosphorus-oxygen lyase activity	16849	0.62361	1	0.15521	1	7	7	0	0
isomerase activity	16853	0.03582	0.55234	0.80462	0.3802	51	51	10	5
racemase and epimerase activity	16854	0.26652	1	0.80103	1	5	5	0	0
racemase and epimerase activity\, acting on carbohydrates and derivatives	16857	0.26652	1	0.80103	1	5	5	0	0
cis-trans isomerase activity	16859	0.12748	1	0.82146	1	10	10	0	0
intramolecular oxidoreductase activity	16860	0.42711	1	0.38498	0.10108	21	21	10	2
intramolecular oxidoreductase activity\, interconverting aldoses and ketoses	16861	0.44045	1	0.91968	1	2	2	0	0
intramolecular oxidoreductase activity\, interconverting keto- and enol-groups	16862	0.21294	1	0.66688	1	5	5	0	0
intramolecular oxidoreductase activity\, transposing C=C bonds	16863	0.60436	1	0.6551	0.20961	9	9	11	1
intramolecular oxidoreductase activity\, transposing S-S bonds	16864	0.21294	1	0.66688	1	5	5	0	0
intramolecular transferase activity	16866	0.30518	0.33301	0.92022	1	7	7	14	1
intramolecular transferase activity\, phosphotransferases	16868	0.30518	0.33301	0.92022	1	7	7	14	1
intramolecular lyase activity	16872	1	1	1	1	1	0	0	0
ligase activity	16874	6e-05	0.17149	0.98134	0.83967	126	125	10	12
ligase activity\, forming carbon-oxygen bonds	16875	0.00297	0.45288	0.96742	0.68365	44	44	9	4
ligase activity\, forming aminoacyl-tRNA and related compounds	16876	0.00203	0.39211	0.97689	1	40	40	8	3
ligase activity\, forming carbon-sulfur bonds	16877	0.62401	0.29328	0.80882	1	6	6	17	1
acid-thiol ligase activity	16878	1	1	1	1	1	0	0	0
ligase activity\, forming carbon-nitrogen bonds	16879	0.01532	0.22597	0.98304	0.78076	58	58	10	6
acid-ammonia (or amide) ligase activity	16880	0.95289	1	0.03835	1	2	2	0	0
acid-amino acid ligase activity	16881	0.03209	0.37663	0.89565	1	39	39	8	3
carbon-nitrogen ligase activity\, with glutamine as amido-N-donor	16884	0.01361	1	0.94654	1	5	5	0	0
ligase activity\, forming carbon-carbon bonds	16885	0.37587	1	0.60274	0.14513	6	6	17	1
ligase activity\, forming phosphoric ester bonds	16886	0.15985	1	0.27399	1	7	7	0	0
ATPase activity	16887	0.01992	0.10526	0.99778	1	10	10	20	2
oxidoreductase activity\, acting on the CH-OH group of donors\, oxygen as acceptor	16899	1	1	1	1	1	0	0	0
oxidoreductase activity\, acting on the aldehyde or oxo group of donors	16903	0.93885	0.55519	0.11271	1	14	14	7	1
SAP kinase 3 activity	16910	1	1	1	1	1	0	0	0
GABA receptor activity	16917	0.83116	0.6261	0.08947	1	17	17	6	1
SUMO-specific protease activity	16929	1	1	1	1	1	0	0	0
glycine-gated chloride channel activity	16934	0.8821	1	0.26833	1	4	4	0	0
lipoate-protein ligase B activity	16978	0.04028	0.20658	0.95493	1	4	4	25	1
lipoate-protein ligase activity	16979	0.04028	0.20658	0.95493	1	4	4	25	1
transcription initiation factor activity	16986	0.89368	1	0.3272	1	2	2	0	0
alpha-sialidase activity	16997	0.75457	1	0.38919	0.16719	7	7	14	1
Ras GTPase binding	17016	1	1	1	1	1	0	0	0
MAP kinase phosphatase activity	17017	0.35092	0.33301	0.57865	1	7	7	14	1
myosin binding	17022	1	1	1	1	1	0	0	0
myosin I binding	17024	1	1	1	1	1	0	0	0
procollagen C-endopeptidase activity	17026	1	1	1	1	1	0	0	0
protein stabilization activity	17028	0.42782	1	0.71386	0.18867	8	8	13	1
ceramidase activity	17040	1	1	1	0.02579	1	0	100	1
D-erythro-sphingosine kinase activity	17050	1	0.05621	1	1	1	0	100	1
FH1 domain binding	17058	1	1	1	1	1	0	0	0
3-galactosyl-N-acetylglucosaminide 4-alpha-L-fucosyltransferase activity	17060	0.81694	1	0.03375	1	3	3	0	0
glutamyl-tRNA(Gln) amidotransferase activity	17068	0.06553	1	0.96576	1	3	3	0	0
snRNA binding	17069	0.01617	1	0.96244	1	3	3	0	0
U6 snRNA binding	17070	0.01617	1	0.96244	1	3	3	0	0
tubulin-specific chaperone activity	17072	0.69751	1	0.07611	1	2	2	0	0
procollagen N-endopeptidase activity	17074	1	0.05621	1	1	1	0	100	1
syntaxin-1 binding	17075	1	1	1	1	1	0	0	0
purine nucleotide binding	17076	0.01702	0.00402	0.97186	0.59272	722	699	11	76
activin inhibitor activity	17106	0.66541	1	0.07153	1	2	2	0	0
nucleoside-diphosphatase activity	17110	0.77854	1	0.32177	1	2	2	0	0
wide-spectrum protease inhibitor activity	17114	1	1	1	1	1	0	0	0
SH3 domain binding	17124	0.7775	1	0.40155	1	3	3	0	0
cholesterol transporter activity	17127	0.36535	1	0.37153	1	2	2	0	0
phospholipid scramblase activity	17128	1	1	1	1	1	0	0	0
fibroblast growth factor binding	17134	1	1	1	1	1	0	0	0
Wnt-protein binding	17147	1	1	1	1	1	0	0	0
protein biosynthesis inhibitor activity	17149	0.00879	0.00316	0.99344	1	2	2	100	2
pantetheinase activity	17159	1	1	1	1	1	0	0	0
vinculin binding	17166	1	1	1	1	1	0	0	0
5-oxoprolinase (ATP-hydrolyzing) activity	17168	1	1	1	1	1	0	0	0
CDP-alcohol phosphatidyltransferase activity	17169	0.10128	1	0.62542	1	2	2	0	0
cysteine dioxygenase activity	17172	1	1	1	1	1	0	0	0
phosphatidylinositol N-acetylglucosaminyltransferase activity	17176	0.01727	1	0.96401	1	2	2	0	0
histone-lysine N-methyltransferase activity	18024	1	1	1	1	1	0	0	0
biotin-protein ligase activity	18271	1	0.05621	1	1	1	0	100	1
alkane 1-monooxygenase activity	18685	0.89278	1	0.06561	1	2	2	0	0
guanyl nucleotide binding	19001	0.64074	0.96	0.28283	0.70833	141	140	5	7
DNA N-glycosylase activity	19104	0.0538	1	0.78207	1	4	4	0	0
deoxynucleoside kinase activity	19136	1	1	1	1	1	0	0	0
aminobutyraldehyde dehydrogenase activity	19145	0.39074	1	0.53522	1	2	2	0	0
carbohydrate kinase activity	19200	1	1	1	1	1	0	0	0
nucleotide kinase activity	19201	0.73752	1	0.63133	1	2	2	0	0
carbohydrate phosphatase activity	19203	0.52127	1	0.47073	1	6	6	0	0
nucleotide phosphatase activity	19204	1	1	1	1	1	0	0	0
nucleobase\, nucleoside\, nucleotide kinase activity	19205	0.44889	1	0.84038	1	6	6	0	0
kinase regulator activity	19207	0.75069	0.49675	0.20912	0.70755	47	47	9	4
phosphatase regulator activity	19208	0.60078	1	0.70301	1	14	14	0	0
kinase activator activity	19209	0.99284	1	0.04855	0.14513	6	6	17	1
kinase inhibitor activity	19210	0.88031	1	0.40116	1	17	17	0	0
phosphatase activator activity	19211	1	1	1	1	1	0	0	0
phosphatase inhibitor activity	19212	0.59201	1	0.69215	1	8	8	0	0
deacetylase activity	19213	0.04817	1	0.8748	1	9	9	0	0
surfactant activity	19214	0.7125	1	0.0621	1	6	6	0	0
centromeric DNA binding	19237	1	0.05621	1	1	1	0	100	1
cyclohydrolase activity	19238	0.01525	1	0.96588	1	2	2	0	0
deaminase activity	19239	0.72023	1	0.73482	0.24987	11	11	9	1
ubiquitin-like-protein-specific protease activity	19783	1	1	1	1	1	0	0	0
oxygen binding	19825	0.86719	0.31104	0.01472	0.01404	20	20	25	5
growth factor binding	19838	0.44057	1	0.6787	0.18867	8	8	13	1
isoprenoid binding	19840	0.94447	1	0.02468	1	8	8	0	0
retinol binding	19841	0.95719	1	0.00335	1	6	6	0	0
vitamin binding	19842	0.45412	0.12339	0.38844	0.43739	22	22	18	4
rRNA binding	19843	0.28814	0.20658	0.97627	1	4	4	25	1
neurotoxin activity	19847	0.92662	1	0.08313	1	5	5	0	0
IgA binding	19862	0.46326	1	0.90848	1	2	2	0	0
IgE binding	19863	0.48657	1	0.83948	1	3	3	0	0
IgG binding	19864	0.15263	0.20658	0.96117	1	4	4	25	1
immunoglobulin binding	19865	0.11524	0.40591	0.99647	1	9	9	11	1
protein kinase regulator activity	19887	0.61728	0.45288	0.32609	0.68365	44	44	9	4
protein phosphatase regulator activity	19888	0.42691	1	0.73985	1	13	13	0	0
kinesin binding	19894	0.59407	1	0.06244	1	3	3	0	0
enzyme binding	19899	0.46384	0.82388	0.18812	0.54363	30	30	7	2
kinase binding	19900	0.28669	1	0.31176	1	12	12	0	0
protein kinase binding	19901	0.28669	1	0.31176	1	12	12	0	0
phosphatase binding	19902	0.9967	1	0.12264	0.0754	3	3	33	1
protein phosphatase binding	19903	0.9967	1	0.12264	0.0754	3	3	33	1
protein domain specific binding	19904	0.55873	0.52868	0.33571	1	13	13	8	1
syntaxin binding	19905	0.61067	1	0.43121	1	5	5	0	0
cytokine binding	19955	1	1	1	1	1	0	0	0
interleukin binding	19965	1	1	1	1	1	0	0	0
sigma DNA polymerase activity	19984	1	1	1	1	1	0	0	0
diacylglycerol binding	19992	0.81472	1	0.01484	1	9	9	0	0
complement factor H activity	30009	1	1	1	1	1	0	0	0
tryptase activity	30019	1	1	1	1	1	0	0	0
extracellular matrix structural constituent conferring tensile strength	30020	0.52944	0.37052	0.12328	1	8	8	13	1
extracellular matrix structural constituent conferring compression resistance	30021	0.96871	1	0.05844	1	4	4	0	0
adhesive extracellular matrix constituent	30022	0.90561	1	0.33391	1	3	3	0	0
extracellular matrix constituent conferring elasticity	30023	1	1	1	1	1	0	0	0
MHC class I receptor activity	30106	0.13648	0.83379	0.03747	1	31	31	3	1
HLA-B specific inhibitory MHC class I receptor activity	30109	0.73021	1	0.51073	1	3	3	0	0
HLA-C specific inhibitory MHC class I receptor activity	30110	0.28872	1	0.1013	1	13	13	0	0
manganese ion binding	30145	0.32479	1	0.21269	1	19	19	0	0
molybdenum ion binding	30151	0.99729	1	0.00842	0.05092	2	2	50	1
benzodiazepine receptor binding	30156	1	1	1	1	1	0	0	0
receptor signaling complex scaffold activity	30159	0.66295	1	0.28727	1	9	9	0	0
GKAP/Homer scaffold activity	30160	1	1	1	1	1	0	0	0
calpain inhibitor activity	30161	1	1	1	1	1	0	0	0
PDZ domain binding	30165	0.8286	1	0.04975	1	2	2	0	0
low-density lipoprotein binding	30169	0.29164	0.20658	0.27358	1	4	4	25	1
voltage-gated proton channel activity	30171	1	0.05621	1	1	1	0	100	1
extracellular matrix constituent\, lubricant activity	30197	1	1	1	1	1	0	0	0
enzyme regulator activity	30234	0.96737	0.63549	0.02058	0.60118	284	280	8	22
carbohydrate binding	30246	0.93158	0.46926	0.00433	0.34512	150	149	9	14
polysaccharide binding	30247	0.45456	0.10609	0.07319	0.18829	58	58	16	9
guanylate cyclase regulator activity	30249	0.99994	1	0.00055	0.0212	9	9	22	2
guanylate cyclase activator activity	30250	0.99996	1	0.00031	0.00631	5	5	40	2
guanylate cyclase inhibitor activity	30251	0.98233	1	0.26355	1	4	4	0	0
glyoxylate reductase (NADP) activity	30267	1	1	1	1	1	0	0	0
chymase activity	30271	1	1	1	1	1	0	0	0
melanin-concentrating hormone receptor activity	30273	1	1	1	1	1	0	0	0
clathrin binding	30276	0.41781	1	0.19208	1	2	2	0	0
structural constituent of epidermis	30280	0.84178	1	0.22978	1	7	7	0	0
estrogen receptor activity	30284	1	1	1	1	1	0	0	0
protein tyrosine kinase inhibitor activity	30292	1	1	1	1	1	0	0	0
protein kinase activator activity	30295	1	1	1	1	1	0	0	0
transmembrane receptor protein tyrosine kinase activator activity	30297	0.99727	1	0.02649	0.05092	2	2	50	1
stromelysin 2 activity	30303	1	0.05621	1	1	1	0	100	1
trypsin inhibitor activity	30304	0.78902	1	0.06411	1	2	2	0	0
ADP-ribosylation factor binding	30306	1	1	1	1	1	0	0	0
structural constituent of tooth enamel	30345	0.96871	1	0.05844	1	4	4	0	0
protein phosphatase 2B binding	30346	0.78025	1	0.22628	1	2	2	0	0
syntaxin-2 binding	30347	0.80132	1	0.47239	1	2	2	0	0
syntaxin-3 binding	30348	1	1	1	1	1	0	0	0
syntaxin-13 binding	30349	1	1	1	1	1	0	0	0
melanin-concentrating hormone activity	30354	0.90162	1	0.46198	1	3	3	0	0
interleukin-17 receptor activity	30368	1	1	1	1	1	0	0	0
ICAM-3 receptor activity	30369	1	1	1	1	1	0	0	0
translation repressor activity	30371	1	1	1	1	1	0	0	0
ligand-dependent nuclear receptor transcription coactivator activity	30374	0.53298	1	0.64587	1	7	7	0	0
interleukin-17E receptor binding	30380	1	1	1	1	1	0	0	0
fructosamine-3-kinase activity	30387	1	1	1	1	1	0	0	0
protease inhibitor activity	30414	0.84065	0.71072	0.08314	0.89198	85	85	6	5
hemoglobin binding	30492	0.03875	0.00912	0.99999	1	3	3	67	2
inorganic diphosphate transporter activity	30504	1	0.05621	1	1	1	0	100	1
ankyrin binding	30506	0.52429	1	0.54141	1	2	2	0	0
thiol-disulfide exchange intermediate activity	30508	0.35594	1	0.83706	1	4	4	0	0
transcription regulator activity	30528	0.70627	0.28463	0.01723	0.9035	595	579	8	48
receptor regulator activity	30545	1	1	1	1	1	0	0	0
receptor activator activity	30546	1	1	1	1	1	0	0	0
cyclic nucleotide binding	30551	0.45109	0.29328	0.36467	1	6	6	17	1
cAMP binding	30552	0.45109	0.29328	0.36467	1	6	6	17	1
adenyl nucleotide binding	30554	0.00111	0.00034	0.93664	0.42493	579	564	12	69
neurotransmitter receptor activity	30594	0.91801	0.32977	0.01013	0.60995	36	36	11	4
arsenate reductase activity	30611	1	1	1	1	1	0	0	0
oxidoreductase activity\, acting on phosphorus or arsenic in donors	30613	1	1	1	1	1	0	0	0
oxidoreductase activity\, acting on phosphorus or arsenic in donors\, with disulfide as acceptor	30614	1	1	1	1	1	0	0	0
transforming growth factor beta receptor\, inhibitory cytoplasmic mediator activity	30617	1	0.05621	1	1	1	0	100	1
protein binding\, bridging	30674	0.8624	0.83379	0.044	1	31	31	3	1
caspase activity	30693	0.58186	1	0.29452	1	9	9	0	0
GTPase regulator activity	30695	0.86837	0.19279	0.24433	0.64154	84	84	11	9
guanidinoacetate N-methyltransferase activity	30731	1	1	1	1	1	0	0	0
GTP-dependent protein binding	30742	1	1	1	1	1	0	0	0
amine N-methyltransferase activity	30748	0.12849	1	0.57409	0.30646	14	14	7	1
beta-2-microglobulin binding	30881	1	1	1	1	1	0	0	0
lipid antigen binding	30882	1	1	1	1	1	0	0	0
exogenous lipid antigen binding	30884	1	1	1	1	1	0	0	0
small GTPase binding	31267	0.26474	0.29328	0.97018	1	6	6	17	1
phosphatidylinositol-4-phosphate 3-kinase activity	35005	1	1	1	1	1	0	0	0
phosphoinositide 3-kinase regulator activity	35014	1	1	1	1	1	0	0	0
phosphoinositide binding	35091	0.21025	0.20658	0.96072	1	4	4	25	1
interleukin-18 binding	42007	1	1	1	1	1	0	0	0
neurexin binding	42043	1	1	1	1	1	0	0	0
chemoattractant activity	42056	0.04275	0.00912	0.99994	1	3	3	67	2
fructose-bisphosphatase activity	42132	1	1	1	1	1	0	0	0
telomeric DNA binding	42162	1	1	1	1	1	0	0	0
neurotransmitter binding	42165	0.92293	0.34543	0.00542	0.62003	37	37	11	4
acetylcholine binding	42166	1	1	1	1	1	0	0	0
SH2 domain binding	42169	1	1	1	1	1	0	0	0
peptide binding	42277	0.28888	0.55519	0.93823	1	14	14	7	1
MHC protein binding	42287	0.56999	1	0.25612	1	7	7	0	0
MHC class I protein binding	42288	0.68914	1	0.36875	1	6	6	0	0
MHC class II protein binding	42289	1	1	1	1	1	0	0	0
phosphate binding	42301	0.09749	0.15932	0.98066	1	3	3	33	1
GDP-4-dehydro-D-rhamnose reductase activity	42356	1	0.05621	1	1	1	0	100	1
histone binding	42393	0.52214	1	0.81244	1	2	2	0	0
triacylated lipoprotein binding	42497	1	1	1	1	1	0	0	0
eukaryotic elongation factor-2 kinase activator activity	42557	1	1	1	1	1	0	0	0
hormone binding	42562	0.54095	0.15932	0.58033	1	3	3	33	1
phosphoric ester hydrolase activity	42578	0.284	0.54491	0.69603	0.8975	87	87	7	6
peptide antigen binding	42605	0.76871	1	0.53575	1	4	4	0	0
exogenous peptide antigen binding	42607	1	1	1	1	1	0	0	0
T cell receptor binding	42608	0.89838	1	0.02259	1	2	2	0	0
ATPase activity\, uncoupled	42624	1	1	1	1	1	0	0	0
identical protein binding	42802	0.98423	1	0.08147	1	5	5	0	0
protein homodimerization activity	42803	0.98423	1	0.08147	1	5	5	0	0
protein homooligomerization activity	42804	0.43516	1	0.40469	1	2	2	0	0
neuronal Cdc2-like kinase binding	42808	1	1	1	1	1	0	0	0
vitamin D receptor binding	42809	0.25088	1	0.72551	1	5	5	0	0
Wnt receptor activity	42813	0.75751	0.29328	0.62181	1	6	6	17	1
histone deacetylase binding	42826	0.68212	1	0.4352	1	2	2	0	0
peptidoglycan binding	42834	0.90554	1	0.07091	1	3	3	0	0
BRE binding	42835	1	1	1	1	1	0	0	0
ornithine decarboxylase regulator activity	42979	0.45733	1	0.29949	1	2	2	0	0
cystic fibrosis transmembrane conductance regulator binding	42980	1	1	1	1	1	0	0	0
gamma-tubulin binding	43015	1	1	1	1	1	0	0	0
ribonucleoprotein binding	43021	0.09071	1	0.95134	1	2	2	0	0
ribosome binding	43022	1	1	1	1	1	0	0	0
caspase inhibitor activity	43027	0.98636	1	0.10103	1	2	2	0	0
caspase regulator activity	43028	0.67521	1	0.68863	1	4	4	0	0
ion binding	43167	0.23138	0.00103	0.00532	2e-05	636	618	14	90
cation binding	43169	0.3768	0.0053	0.00271	1e-05	568	554	14	80
amine binding	43176	0.52578	0.33301	0.36244	1	7	7	14	1
sequence-specific DNA binding	43565	0.53815	0.40591	0.85596	1	9	9	11	1
structure-specific DNA binding	43566	0.094	0.60382	0.9041	0.3418	16	16	13	2
MHC class II receptor activity	45012	0.92569	1	0.03615	1	8	8	0	0
purinergic nucleotide receptor activity\, G-protein coupled	45028	0.9385	0.55519	0.20286	0.30646	14	14	14	2
UDP-activated nucleotide receptor activity	45029	1	1	1	0.02579	1	0	100	1
N-acetylglucosamine kinase activity	45127	1	1	1	1	1	0	0	0
electron transporter\, transferring electrons from CoQH2-cytochrome c reductase complex and cytochrome c oxidase complex activity	45155	1	1	1	1	1	0	0	0
translation regulator activity	45182	4e-05	0.95356	0.7581	1	53	53	2	1
cadherin binding	45296	1	0.05621	1	1	1	0	100	1
unmethylated CpG binding	45322	1	1	1	1	1	0	0	0
dynein binding	45502	0.1939	1	0.95663	1	2	2	0	0
interleukin-20 receptor binding	45517	0.43935	1	0.24309	1	2	2	0	0
interleukin-22 receptor binding	45518	1	1	1	1	1	0	0	0
TRAIL binding	45569	1	1	1	1	1	0	0	0
nutrient reservoir activity	45735	0.19429	1	0.83679	1	4	4	0	0
SMAD binding	46332	1	1	1	1	1	0	0	0
polynucleotide 3'-phosphatase activity	46403	1	1	1	1	1	0	0	0
histamine N-methyltransferase activity	46539	1	1	1	1	1	0	0	0
host cell surface receptor binding	46789	1	1	1	1	1	0	0	0
virion binding	46790	1	1	1	1	1	0	0	0
host cell surface binding	46812	1	1	1	1	1	0	0	0
hydroxyapatite binding	46848	0.41001	1	0.50623	1	2	2	0	0
cadmium ion binding	46870	0.9983	1	0.06271	0.0754	3	3	33	1
metal ion binding	46872	0.23138	0.00103	0.00532	2e-05	636	618	14	90
metal ion transporter activity	46873	0.26824	0.04855	0.56588	1	15	15	20	3
ephrin receptor binding	46875	1	1	1	1	1	0	0	0
transferase activity\, transferring acyl groups\, acyl groups converted into alkyl on transfer	46912	0.46059	1	0.48427	1	4	4	0	0
transition metal ion binding	46914	0.68597	0.3039	0.03213	1e-05	245	242	15	36
alpha(1\,3)-fucosyltransferase activity	46920	0.77053	1	0.03374	1	4	4	0	0
ER retention sequence binding	46923	1	1	1	1	1	0	0	0
hydrogen-transporting ATP synthase activity\, rotational mechanism	46933	0.48365	1	0.27451	1	2	2	0	0
phosphatidylinositol-4\,5-bisphosphate 3-kinase activity	46934	0.92361	1	0.33539	1	2	2	0	0
phosphatidylinositol 3-kinase regulator activity	46935	1	1	1	1	1	0	0	0
carboxylic acid transporter activity	46943	0.88533	1	0.49169	0.3418	16	16	6	1
hydrogen-transporting ATPase activity\, rotational mechanism	46961	0.08377	0.20658	1	1	4	4	25	1
thyroid hormone receptor binding	46966	0.48649	1	0.57535	1	9	9	0	0
TAP binding	46977	0.40551	1	0.70979	1	2	2	0	0
TAP1 binding	46978	0.40551	1	0.70979	1	2	2	0	0
TAP2 binding	46979	0.40551	1	0.70979	1	2	2	0	0
tapasin binding	46980	0.19233	1	0.70979	1	2	2	0	0
protein heterodimerization activity	46982	0.87235	1	0.03532	1	9	9	0	0
protein dimerization activity	46983	0.98042	1	0.00199	1	13	13	0	0
prostaglandin-F synthase activity	47017	1	1	1	1	1	0	0	0
15-hydroxyprostaglandin dehydrogenase (NADP+) activity	47021	1	1	1	1	1	0	0	0
3-alpha(17-beta)-hydroxysteroid dehydrogenase (NAD+) activity	47035	1	1	1	0.02579	1	0	100	1
4-trimethylammoniobutyraldehyde dehydrogenase activity	47105	0.39074	1	0.53522	1	2	2	0	0
trans-1\,2-dihydrobenzene-1\,2-diol dehydrogenase activity	47115	0.55153	1	0.15984	1	2	2	0	0
betaine-homocysteine S-methyltransferase activity	47150	1	1	1	1	1	0	0	0
beta-1\,3-galactosyl-O-glycosyl-glycoprotein beta-1\,3-N-acetylglucosaminyltransferase activity	47223	1	1	1	0.02579	1	0	100	1
(alpha-N-acetylneuraminyl-2\,3-beta-galactosyl-1\,3)-N-acetyl-galactosaminide 6-alpha-sialyltransferase activity	47290	1	1	1	1	1	0	0	0
lactosylceramide alpha-2\,3-sialyltransferase activity	47291	1	1	1	1	1	0	0	0
fucose-1-phosphate guanylyltransferase activity	47341	0.60722	1	0.64646	1	2	2	0	0
protein N-terminus binding	47485	1	1	1	1	1	0	0	0
calcium-dependent phospholipase A2 activity	47498	0.94642	1	0.00927	1	3	3	0	0
calcium-independent phospholipase A2 activity	47499	1	1	1	1	1	0	0	0
3-oxo-5-beta-steroid 4-dehydrogenase activity	47568	1	1	1	1	1	0	0	0
acyl-CoA dehydrogenase (NADP+) activity	47616	1	1	1	1	1	0	0	0
beta-adrenergic receptor kinase activity	47696	1	1	1	1	1	0	0	0
butyrate-CoA ligase activity	47760	1	1	1	1	1	0	0	0
corticosterone 18-monooxygenase activity	47783	1	1	1	1	1	0	0	0
glycine N-acyltransferase activity	47961	1	1	1	1	1	0	0	0
receptor antagonist activity	48019	1	1	1	1	1	0	0	0
monosaccharide binding	48029	0.9689	1	0.23196	1	2	2	0	0
cofactor binding	48037	0.63203	0.33301	0.63562	1	7	7	14	1
S100 beta binding	48154	1	1	1	1	1	0	0	0
S100 alpha binding	48155	1	1	1	1	1	0	0	0
tau protein binding	48156	0.99985	1	0.00726	0.05092	2	2	50	1
peptide antigen stabilization activity	48192	1	1	1	1	1	0	0	0
methionine adenosyltransferase regulator activity	48270	1	1	1	1	1	0	0	0
mitogen-activated protein kinase p38 binding	48273	1	1	1	1	1	0	0	0
lathosterol oxidase activity	50046	1	1	1	1	1	0	0	0
leukotriene-B4 20-monooxygenase activity	50051	0.1874	0.3321	0.51692	1	21	21	10	2
inositol oxygenase activity	50113	1	1	1	1	1	0	0	0
N-acylglucosamine 2-epimerase activity	50121	1	1	1	1	1	0	0	0
fucokinase activity	50201	1	1	1	1	1	0	0	0
prostaglandin-E2 9-reductase activity	50221	1	1	1	1	1	0	0	0
thiamin-triphosphatase activity	50333	1	1	1	1	1	0	0	0
unspecific monooxygenase activity	50381	0.54927	0.12339	0.02226	0.01825	22	22	27	6
syntaxin-6 binding	50430	1	1	1	1	1	0	0	0
arachidonate 15-lipoxygenase activity	50473	0.95855	1	0.15291	1	2	2	0	0
hyaluronan synthase activity	50501	0.91017	1	0.31957	1	2	2	0	0
glucuronosyl-N-acetylglucosaminyl-proteoglycan 4-alpha-N-acetylglucosaminyltransferase activity	50508	1	1	1	1	1	0	0	0
lactosylceramide 4-alpha-galactosyltransferase activity	50512	1	1	1	1	1	0	0	0
icosanoid binding	50542	1	1	1	1	1	0	0	0
icosatetraenoic acid binding	50543	1	1	1	1	1	0	0	0
GDP-L-fucose synthase activity	50577	1	0.05621	1	1	1	0	100	1
delta14-sterol reductase activity	50613	1	1	1	1	1	0	0	0
5-oxo-6E\,8Z\,11Z\,14Z-icosatetraenoic acid binding	50646	1	1	1	1	1	0	0	0
5-hydroxy-6E\,8Z\,11Z\,14Z-icosatetraenoic acid binding	50647	1	1	1	1	1	0	0	0
5(S)-hydroxyperoxy-6E\,8Z\,11Z\,14Z-icosatetraenoic acid binding	50648	1	1	1	1	1	0	0	0
3'-phosphoadenosine 5'-phosphosulfate binding	50656	1	1	1	1	1	0	0	0
NADP binding	50661	0.77402	1	0.60218	1	2	2	0	0
coenzyme binding	50662	0.63203	0.33301	0.63562	1	7	7	14	1
oxidoreductase activity\, acting on NADH or NADPH\, with oxygen as acceptor	50664	0.39811	0.15932	0.9131	1	3	3	33	1
galactose 3-O-sulfotransferase activity	50694	0.42803	1	0.89971	1	3	3	0	0
WW domain binding	50699	1	0.05621	1	1	1	0	100	1
RS domain binding	50733	0.13111	1	0.48205	1	2	2	0	0
apolipoprotein E receptor binding	50749	1	1	1	0.02579	1	0	100	1
low-density lipoprotein receptor binding	50750	1	1	1	0.02579	1	0	100	1
cell adhesion molecule binding	50839	1	0.05621	1	1	1	0	100	1
GTPase binding	51020	0.26474	0.29328	0.97018	1	6	6	17	1
sugar transporter activity	51119	0.58284	1	0.39402	0.14513	6	6	17	1
vitamin transporter activity	51183	0.57647	1	0.47989	1	4	4	0	0
cofactor transporter activity	51184	0.2598	1	0.95802	1	5	5	0	0
dioxygenase activity	51213	0.70641	0.31104	0.37207	1	20	20	10	2
Exon_CC_BP_GO_analysis
name	GO ID	KS-P	Fishex	KS-P	FISHEX	N	KS	% Changed	# changed
		(high)	(INC)	(low)	(DEC)		accur	Genes	Genes
reproduction	3	0.21858	0.07264	0.40971	0.60426	162	161	11	18
biological process unknown	4	0.11417	0.7008	0.70065	0.03073	522	510	9	48
single strand break repair	12	0.45962	1	0.72002	1	3	3	0	0
regulation of DNA recombination	18	0.56076	1	0.35939	1	4	4	0	0
ribosomal large subunit assembly and maintenance	27	1	0.05621	1	1	1	0	100	1
very-long-chain fatty acid metabolism	38	0.26032	0.15932	0.89235	1	3	3	33	1
transition metal ion transport	41	0.15865	0.04049	0.82271	1	14	14	21	3
urea cycle	50	0.47676	1	0.20921	1	3	3	0	0
urea cycle intermediate metabolism	51	0.25158	1	0.63616	1	6	6	0	0
protein import into nucleus\, docking	59	0.03381	0.25119	0.99624	1	5	5	20	1
protein import into nucleus\, translocation	60	0.95996	1	0.17048	1	4	4	0	0
mitochondrial ornithine transport	66	1	1	1	1	1	0	0	0
DNA replication and chromosome cycle	67	0.01223	0.10926	0.98847	1	2	2	50	1
mitotic sister chromatid segregation	70	0.00445	0.12403	0.94767	1	11	11	18	2
M phase specific microtubule process	72	1	1	1	1	1	0	0	0
regulation of progression through cell cycle	74	1e-05	0	0.99872	0.91816	215	213	17	37
cell cycle checkpoint	75	0.00021	0.00026	0.99725	1	24	24	29	7
DNA replication checkpoint	76	0.18535	0.15932	0.78786	1	3	3	33	1
DNA damage checkpoint	77	0.168	0.05489	0.93456	1	7	7	29	2
regulation of cyclin dependent protein kinase activity	79	0.05145	0.01597	0.97336	1	27	27	19	5
G1 phase of mitotic cell cycle	80	0.0163	0.14352	0.99837	1	12	12	17	2
G1/S transition of mitotic cell cycle	82	0.03669	0.07051	0.98966	1	8	8	25	2
G1/S-specific transcription in mitotic cell cycle	83	1	1	1	1	1	0	0	0
S phase of mitotic cell cycle	84	0.08832	0.02817	0.9981	1	5	5	40	2
G2 phase of mitotic cell cycle	85	1	1	1	1	1	0	0	0
G2/M transition of mitotic cell cycle	86	0.00909	0.02817	0.99204	1	5	5	40	2
M phase of mitotic cell cycle	87	0	0	0.99142	1	77	77	29	22
mitotic metaphase	89	1	0.05621	1	1	1	0	100	1
mitotic anaphase	90	1	1	1	1	1	0	0	0
septin assembly and septum formation	94	1	0.05621	1	1	1	0	100	1
sulfur amino acid metabolism	96	0.11038	0.5006	0.64001	0.26923	12	12	17	2
sulfur amino acid biosynthesis	97	0.05759	1	0.75413	0.14513	6	6	17	1
sulfur amino acid transport	101	1	1	1	1	1	0	0	0
histidine biosynthesis	105	1	1	1	1	1	0	0	0
G1-specific transcription in mitotic cell cycle	114	1	1	1	1	1	0	0	0
negative regulation of transcription from RNA polymerase II promoter	122	0.09952	0.63803	0.95601	0.62984	38	38	8	3
rRNA modification	154	0.18631	1	0.96809	1	4	4	0	0
two-component signal transduction system (phosphorelay)	160	0.79431	1	0.33057	0.18867	8	8	13	1
MAPKKK cascade during osmolarity sensing	161	1	1	1	1	1	0	0	0
tryptophan biosynthesis	162	1	1	1	1	1	0	0	0
MAPKKK cascade	165	0.94752	0.70431	0.42799	0.30483	43	43	9	4
inactivation of MAPK activity during osmolarity sensing	173	1	1	1	1	1	0	0	0
mRNA catabolism\, nonsense-mediated decay	184	1	1	1	1	1	0	0	0
activation of MAPKKK activity	185	0.48491	1	0.19329	1	2	2	0	0
activation of MAPKK activity	186	1	1	1	1	1	0	0	0
activation of MAPK activity	187	0.88765	0.60382	0.02404	0.06278	16	16	19	3
inactivation of MAPK activity	188	0.46221	1	0.8762	1	9	9	0	0
microtubule cytoskeleton organization and biogenesis	226	0.58121	0.11096	0.75078	1	21	21	14	3
assembly of spliceosomal tri-snRNP	244	0.13111	1	0.48205	1	2	2	0	0
spliceosome assembly	245	0.00397	1	0.90954	1	10	10	0	0
peptidoglycan metabolism	270	0.72203	1	0.35167	1	11	11	0	0
polysaccharide biosynthesis	271	0.6165	1	0.14241	1	16	16	0	0
polysaccharide catabolism	272	0.56378	1	0.27477	0.12249	5	5	20	1
mitotic cell cycle	278	0	0	0.98912	1	98	98	27	26
M phase	279	0	0	0.98574	0.96598	129	128	22	28
response to reactive oxygen species	302	0.48791	1	0.28033	0.05092	2	2	50	1
RNA splicing\, via transesterification reactions	375	0	0.92615	0.83788	1	45	45	2	1
RNA splicing\, via transesterification reactions with bulged adenosine as nucleophile	377	0	0.92615	0.83788	1	45	45	2	1
spliceosomal snRNP biogenesis	387	0.05675	1	0.5147	1	3	3	0	0
RNA splicing\, via endonucleolytic cleavage and ligation	394	0.43219	1	0.70403	1	4	4	0	0
nuclear mRNA 5'-splice site recognition	395	0.13111	1	0.48205	1	2	2	0	0
nuclear mRNA splicing\, via spliceosome	398	0	0.92615	0.83788	1	45	45	2	1
embryonic axis specification	578	0.74848	1	0.19982	1	3	3	0	0
telomere maintenance	723	0.1135	0.20658	0.98798	1	4	4	25	1
double-strand break repair via homologous recombination	724	1	0.05621	1	1	1	0	100	1
recombinational repair	725	1	0.05621	1	1	1	0	100	1
non-recombinational repair	726	1	1	1	1	1	0	0	0
DNA synthesis during DNA repair	731	1	1	1	1	1	0	0	0
sister chromatid segregation	819	0.00445	0.12403	0.94767	1	11	11	18	2
cellular morphogenesis	902	0.46455	0.16248	0.12872	0.34071	80	80	13	10
cellular morphogenesis during differentiation	904	0.76197	0.39398	0.22689	0.46606	24	24	13	3
cytokinesis	910	4e-05	0.00021	0.9929	1	55	55	20	11
septin ring assembly	921	1	1	1	1	1	0	0	0
response to acid	1101	1	1	1	1	1	0	0	0
skeletal development	1501	0.03601	6e-05	0.13551	0.88911	84	84	19	16
cartilage condensation	1502	0.27977	0.10526	0.99464	1	10	10	20	2
ossification	1503	0.59452	0.16334	0.89019	1	25	25	12	3
neurotransmitter uptake	1504	1	1	1	0.02579	1	0	100	1
regulation of neurotransmitter levels	1505	0.98674	1	0.00108	0.12643	24	24	8	2
acetylcholine catabolism in synaptic cleft	1507	1	1	1	1	1	0	0	0
regulation of action potential	1508	0.27295	0.10926	0.48369	1	2	2	50	1
RNA methylation	1510	1	1	1	1	1	0	0	0
prostaglandin biosynthesis	1516	0.97309	1	0.01761	1	4	4	0	0
pseudouridine synthesis	1522	1	1	1	1	1	0	0	0
retinoid metabolism	1523	1	1	1	1	1	0	0	0
angiogenesis	1525	0.20546	0.02337	0.04232	0.01404	20	20	35	7
proteoglycan sulfate transfer	1526	1	1	1	1	1	0	0	0
ciliary or flagellar motility	1539	1	1	1	1	1	0	0	0
ovarian follicle development	1541	0.66541	1	0.50435	1	2	2	0	0
regulation of cell growth	1558	0.6765	0.29844	0.48468	0.21844	34	34	15	5
fatty acid alpha-oxidation	1561	1	1	1	1	1	0	0	0
blood vessel development	1568	0.23223	0.02762	0.02113	0.01607	21	21	33	7
patterning of blood vessels	1569	1	1	1	1	1	0	0	0
vasculogenesis	1570	1	1	1	1	1	0	0	0
ganglioside metabolism	1573	1	1	1	1	1	0	0	0
ganglioside biosynthesis	1574	1	1	1	1	1	0	0	0
eye development	1654	0.55976	0.20658	0.41389	1	4	4	25	1
response to hypoxia	1666	0.37974	1	0.34985	1	2	2	0	0
histamine metabolism	1692	1	1	1	1	1	0	0	0
histamine biosynthesis	1694	1	1	1	1	1	0	0	0
embryonic development (sensu Mammalia)	1701	1	1	1	1	1	0	0	0
formation of primary germ layer	1704	0.33684	0.05489	0.42104	0.16719	7	7	43	3
mesoderm formation	1707	0.33684	0.05489	0.42104	0.16719	7	7	43	3
cell fate determination	1709	0.69899	0.22604	0.48516	0.3418	16	16	19	3
mesodermal cell fate commitment	1710	0.33684	0.05489	0.42104	0.16719	7	7	43	3
eye development (sensu Mammalia)	1747	0.27608	0.10926	0.99961	1	2	2	50	1
morphogenesis of a branching structure	1763	1	1	1	1	1	0	0	0
microglial cell activation	1774	1	1	1	1	1	0	0	0
cell activation	1775	0.85486	0.29612	0.01462	0.72247	49	49	10	5
immune cell homeostasis	1776	1	1	1	1	1	0	0	0
cytokine production	1816	0.97336	1	0.0364	1	18	18	0	0
regulation of cytokine production	1817	0.97758	1	0.07617	1	15	15	0	0
negative regulation of cytokine production	1818	0.56256	1	0.38037	1	3	3	0	0
[truncated: 1,560 more rows]
