# Supplementary material for: Identifying Alternative Hyper-Splicing Signatures in MG-Thymoma by Exon Arrays
Source: PLoS One. 2008 Jun 11;3(6):e2392. doi: 10.1371/journal.pone.0002392 (PMC2409220; doi:10.1371/journal.pone.0002392)
Supplement: Table S3 — Specific, Term-To-Parent Functional GO Analysis Results on MG-Thymoma Data Set. Results of hierarchical comparison between GO terms to their direct and indirect (BP/MF) parent GO terms in MG-thymoma exon array data set are given for all the terms represented on Affymetrix exon 1.0 S_T array. The columns of the Excel table are: Name (of GO term), GO ID (of the term), Parent name (the name and GO ID of the compared parent, KS-P (high): p-value for the one tailed KS test (ie, the continuous method), testing the hypothesis that the tested distribution contains larger values than the global distribution, Fishex (INC): p-value for the Fisher exact test using the hypergeometric distribution (ie, the discrete method), testing the hypothesis that the tested distribution contains a larger than expected number of increased (INC) genes (using a 2-fold cutoff), KS-P (low)-a p-value for the one tailed KS test (ie, the continuous method), testing the hypothesis that the tested distribution contains smaller values than those observed with the global distribution, Fishex (DEC): a p-value for the Fisher exact test using the hypergeometric distribution (ie, the discrete methods), testing the hypothesis that the testes distribution contain larger than expected number of decreased (DEC) genes (using a 2-fold cutoff), N-the number of transcripts associated with the GO term, KS accur (KS accuracy)-a number indicating the reliability of the KS test. The p- value is most accurate when KS accur >4.VAR: P value for variances (VAR) test indicating a change in dispersion and of Kruskal Wallis (KW) test indicate a change in location. The percent of transcripts that changed more than the threshold (both increased and decreased) of all the GO term transcripts (% change genes), the number of changed genes (# changed genes)-the number of transcripts that changed more than the threshold (both increased and decreased) out of all the GO term transcripts. The red and blue cells in the tables indicate th [file pone.0002392.s016.xls]

## Sheet: Exon_Thymoma_MF_GO_analysis_TP
name	GO ID	parent name	KS-P (high)	KS-P (low)	KS accur	VAR	KW	Fishex high	Fishex low	N child	N parent	% Changed Genes	# Changed genes
nucleotide binding	166	molecular function	0.87385	0.08168	197.126	NaN	NaN	0.19767	0.27535	199	20931	8	15
nucleotide binding	166	5488 binding	0.85987	0.28223	158.09	NaN	NaN	0	0	199	769	8	15
nucleotide binding	166	30528 transcription regulator activity	0.50689	0.68095	65.2128	1.01625	0.72408	NaN	NaN	199	97	8	15
heterotrimeric G-protein GTPase\, beta-subunit	264	molecular function	0.13355	0.73148	1.99981	0.63464	0.37124	1	1	2	21128	0	0
heterotrimeric G-protein GTPase\, beta-subunit	264	8369 obsolete molecular function	0.10871	0.7996	1.97938	0.28267	0.27908	1	1	2	192	0	0
heterotrimeric G-protein GTPase\, beta-subunit	264	8757 S-adenosylmethionine-dependent methyltransferase activity	0.05444	0.91949	1.94521	0.64151	0.15092	1	1	2	71	0	0
magnesium ion binding	287	molecular function	0.01982	0.88214	20.9791	0.91598	0.10237	1	0.43416	21	21109	5	1
magnesium ion binding	287	46872 metal ion binding	0.02524	0.84995	18.5085	0.10988	0.06257	1	0.00199	21	156	5	1
rhodopsin-like receptor activity	1584	molecular function	0.88521	0.35684	72.7478	NaN	NaN	0.87834	0.58389	73	21057	4	3
rhodopsin-like receptor activity	1584	4930 G-protein coupled receptor activity	0.50925	0.18893	8.0122	1.11256	0.59331	NaN	1e-05	73	9	4	3
G-protein chemoattractant receptor activity	1637	molecular function	0.99867	0.0027	2.99957	0.73579	0.00606	1	0.0021	3	21127	67	2
G-protein chemoattractant receptor activity	1637	16526 G-protein coupled receptor activity\, unknown ligand	1	0.0632	2.1	0.3625	0.05	1	NaN	3	7	67	2
peptide receptor activity	1653	molecular function	0.98312	0.01847	45.8999	NaN	NaN	1	0.34858	46	21084	4	2
peptide receptor activity	1653	4872 receptor activity	0.98202	0.01357	34.1788	0.96803	NaN	1	1e-05	46	133	4	2
opsonin binding	1846	molecular function	0.0803	0.62183	1.99981	NaN	0.34948	1	1	2	21128	0	0
opsonin binding	1846	5515 protein binding	0.07757	0.63855	1.98947	NaN	0.32495	1	1	2	378	0	0
opsonin receptor activity	1847	molecular function	0.0803	0.62183	1.99981	NaN	0.34948	1	1	2	21128	0	0
opsonin receptor activity	1847	4888 transmembrane receptor activity	0.05829	0.71748	1.9633	NaN	0.2542	1	1	2	107	0	0
complement binding	1848	molecular function	0.0803	0.62183	1.99981	NaN	0.34948	1	1	2	21128	0	0
complement binding	1848	5515 protein binding	0.07757	0.63855	1.98947	NaN	0.32495	1	1	2	378	0	0
complement binding	1848	4888 transmembrane receptor activity	0.05829	0.71748	1.9633	NaN	0.2542	1	1	2	107	0	0
complement component C3a binding	1850	molecular function	0.0803	0.62183	1.99981	NaN	0.34948	1	1	2	21128	0	0
pattern binding	1871	molecular function	0.04843	0.79652	9.99527	0.87463	0.41512	1	1	10	21120	0	0
pattern binding	1871	5488 binding	0.03033	0.8582	9.89669	0.87628	0.2691	1	1	10	958	0	0
pattern binding	1871	4875 complement receptor activity	0.66835	0.11149	1.66667	0	0.48485	1	1	10	2	0	0
nucleic acid binding	3676	molecular function	0.36101	0.07764	356.764	NaN	NaN	0.88777	0.99685	363	20767	3	10
nucleic acid binding	3676	5488 binding	0.57593	0.22092	226.875	NaN	NaN	0	0.00159	363	605	3	10
nucleic acid binding	3676	4875 complement receptor activity	0.68301	0.06555	1.98904	NaN	0.27778	NaN	NaN	363	2	3	10
DNA binding	3677	molecular function	0.43105	0.39238	241.182	NaN	NaN	0.82153	0.95971	244	20886	3	8
DNA binding	3677	3676 nucleic acid binding	0.2738	0.9622	79.989	1.01463	0.24438	NaN	NaN	244	119	3	8
DNA binding	3677	4875 complement receptor activity	0.64127	0.0783	1.98374	NaN	0.33562	NaN	NaN	244	2	3	8
damaged DNA binding	3684	molecular function	0.55627	0.83382	2.99957	0.73579	0.77223	1	1	3	21127	0	0
damaged DNA binding	3684	3677 DNA binding	0.53966	0.86831	2.96311	0.73881	0.74198	1	1	3	241	0	0
damaged DNA binding	3684	4875 complement receptor activity	0.6806	0.21457	1.2	0	0.8	1	1	3	2	0	0
transcription factor activity	3700	molecular function	0.72755	0.23477	77.7121	0.95736	0.27575	0.6529	1	78	21052	3	2
transcription factor activity	3700	3677 DNA binding	0.7818	0.25883	53.0656	0.9811	0.30905	4e-05	1	78	166	3	2
transcription factor activity	3700	30528 transcription regulator activity	0.20337	0.73007	32.9333	0.00013	0.37174	1e-05	1	78	57	3	2
transcription factor activity	3700	4875 complement receptor activity	0.73935	0.05996	1.95	0	0.23543	NaN	1	78	2	3	2
RNA polymerase I transcription factor activity	3701	molecular function	0.83446	0.05616	4.99882	0.81206	0.21871	1	1	5	21125	0	0
RNA polymerase I transcription factor activity	3701	30528 transcription regulator activity	0.76749	0.15592	4.81481	0.03549	0.45939	1	1	5	130	0	0
RNA polymerase I transcription factor activity	3701	30528 transcription regulator activity	0.76749	0.15592	4.81481	0.03549	0.45939	1	1	5	130	0	0
RNA polymerase I transcription factor activity	3701	4875 complement receptor activity	1	0.01905	1.42857	0	0.09524	1	1	5	2	0	0
RNA polymerase II transcription factor activity	3702	molecular function	0.41755	0.02208	56.8462	0.94993	0.09154	0.48328	1	57	21073	4	2
RNA polymerase II transcription factor activity	3702	30528 transcription regulator activity	0.51609	0.40283	32.9333	0.00033	0.80816	1e-05	1	57	78	4	2
RNA polymerase II transcription factor activity	3702	30528 transcription regulator activity	0.51609	0.40283	32.9333	0.00033	0.80816	1e-05	1	57	78	4	2
RNA polymerase II transcription factor activity	3702	4875 complement receptor activity	0.85602	0.03225	1.9322	0	0.12629	NaN	1	57	2	4	2
specific RNA polymerase II transcription factor activity	3704	molecular function	0.93888	0.34314	1.99981	0.63464	0.39151	1	1	2	21128	0	0
specific RNA polymerase II transcription factor activity	3704	3702 RNA polymerase II transcription factor activity	0.83202	0.36742	1.92982	0.77906	0.5582	1	1	2	55	0	0
specific RNA polymerase II transcription factor activity	3704	30528 transcription regulator activity	0.89552	0.4494	1.97037	0.95128	0.56001	1	1	2	133	0	0
specific RNA polymerase II transcription factor activity	3704	4875 complement receptor activity	1	0.04852	1	0	0.33333	1	1	2	2	0	0
RNA polymerase II transcription factor activity\, enhancer binding	3705	molecular function	0.52402	0.4019	1.99981	0.63464	0.85508	1	1	2	21128	0	0
RNA polymerase II transcription factor activity\, enhancer binding	3705	3700 transcription factor activity	0.45268	0.50137	1.94872	0.52884	0.96218	1	1	2	76	0	0
RNA polymerase II transcription factor activity\, enhancer binding	3705	3702 RNA polymerase II transcription factor activity	0.27043	0.68708	1.92982	0.33488	0.58772	1	1	2	55	0	0
RNA polymerase II transcription factor activity\, enhancer binding	3705	4875 complement receptor activity	1	0.04852	1	0	0.33333	1	1	2	2	0	0
steroid hormone receptor activity	3707	molecular function	0.18765	0.99249	2.99957	0.73579	0.20041	1	1	3	21127	0	0
steroid hormone receptor activity	3707	3702 RNA polymerase II transcription factor activity	0.12542	0.9914	2.85	1.08894	0.1035	1	1	3	57	0	0
steroid hormone receptor activity	3707	4875 complement receptor activity	0.21457	0.6806	1.2	0	0.8	1	1	3	2	0	0
transcriptional elongation regulator activity	3711	molecular function	0.91349	0.62557	3.99924	0.78329	0.6843	1	1	4	21126	0	0
transcriptional elongation regulator activity	3711	30528 transcription regulator activity	0.80245	0.6811	3.88148	0.62969	0.96377	1	1	4	131	0	0
transcriptional elongation regulator activity	3711	3702 RNA polymerase II transcription factor activity	0.68947	0.62028	3.72881	0.37869	0.98797	1	1	4	55	0	0
transcriptional elongation regulator activity	3711	4875 complement receptor activity	0.79089	0.12107	1.33333	0	0.53333	1	1	4	2	0	0
transcription cofactor activity	3712	molecular function	0.03834	0.95253	29.9574	0.93028	0.08806	0.57886	1	30	21100	3	1
transcription cofactor activity	3712	30528 transcription regulator activity	0.00152	0.94459	24.2308	0.18034	0.00875	0.00567	1	30	126	3	1
transcription cofactor activity	3712	4875 complement receptor activity	0.39642	0.2055	1.875	0	0.78516	NaN	1	30	2	3	1
transcription coactivator activity	3713	molecular function	0.76588	0.65094	13.9907	0.89572	0.83503	1	1	14	21116	0	0
transcription coactivator activity	3713	3712 transcription cofactor activity	0.99867	0.02043	7.46667	0.75404	0.04369	1	1	14	16	0	0
transcription coactivator activity	3713	4875 complement receptor activity	0.80746	0.0564	1.75	0	0.26667	1	1	14	2	0	0
transcription corepressor activity	3714	molecular function	0.00534	0.97385	15.9879	0.90294	0.01142	0.36939	1	16	21114	6	1
transcription corepressor activity	3714	3712 transcription cofactor activity	0.02043	0.99867	7.46667	0.75404	0.04369	NaN	1	16	14	6	1
transcription corepressor activity	3714	16564 transcriptional repressor activity	0.0704	1	1.77778	0.8088	0.10458	NaN	1	16	2	6	1
transcription corepressor activity	3714	4875 complement receptor activity	0.15837	0.51509	1.77778	0	0.61438	NaN	1	16	2	6	1
RNA binding	3723	molecular function	0.28954	0.28742	82.674	0.9587	0.69281	0.20763	1	83	21047	5	4
RNA binding	3723	3676 nucleic acid binding	0.40781	0.76337	64.022	0.97419	0.65428	NaN	1	83	280	5	4
RNA binding	3723	16564 transcriptional repressor activity	0.92856	0.01059	14.7921	0.03756	0.04832	NaN	1	83	18	5	4
RNA binding	3723	4875 complement receptor activity	0.72166	0.05823	1.95294	0	0.2403	NaN	1	83	2	5	4
single-stranded RNA binding	3727	molecular function	0.0378	0.92353	1.99981	0.63464	0.10834	1	1	2	21128	0	0
single-stranded RNA binding	3727	3723 RNA binding	0.034	0.92531	1.95181	0.26296	0.09932	1	1	2	81	0	0
single-stranded RNA binding	3727	4875 complement receptor activity	0.04852	1	1	0	0.33333	1	1	2	2	0	0
mRNA binding	3729	molecular function	0.0378	0.92353	1.99981	0.63464	0.10834	1	1	2	21128	0	0
mRNA binding	3729	3723 RNA binding	0.034	0.92531	1.95181	0.26296	0.09932	1	1	2	81	0	0
mRNA binding	3729	4875 complement receptor activity	0.04852	1	1	0	0.33333	1	1	2	2	0	0
structural constituent of ribosome	3735	molecular function	0.61812	0.1575	18.9829	0.91142	0.78073	1	1	19	21111	0	0
structural constituent of ribosome	3735	5198 structural molecule activity	0.44007	0.61236	14.4304	0.14179	0.70929	1	1	19	60	0	0
structural constituent of ribosome	3735	4875 complement receptor activity	0.88752	0.03357	1.80952	0	0.13411	1	1	19	2	0	0
translation initiation factor activity	3743	molecular function	0.31605	0.81849	3.99924	0.78329	0.41356	1	1	4	21126	0	0
translation initiation factor activity	3743	4875 complement receptor activity	0.39125	0.39125	1.33333	0	1	1	1	4	2	0	0
chaperone activity	3754	molecular function	0.49955	0.28359	3.99924	0.78329	0.53715	1	1	4	21126	0	0
chaperone activity	3754	8369 obsolete molecular function	0.48548	0.36022	3.91753	0.06471	0.68222	1	1	4	190	0	0
chaperone activity	3754	4875 complement receptor activity	1	0.02343	1.33333	0	0.13333	1	1	4	2	0	0
heat shock protein activity	3773	molecular function	0.30795	0.99237	1.99981	0.63464	0.2984	0.05599	1	2	21128	50	1
heat shock protein activity	3773	8369 obsolete molecular function	0.27578	0.99498	1.97938	0.15714	0.25721	0.00057	1	2	192	50	1
heat shock protein activity	3773	4875 complement receptor activity	0.46933	0.46933	1	0	1	NaN	1	2	2	50	1
motor activity	3774	molecular function	0.88356	0.21524	16.9863	NaN	NaN	0.38731	0.3693	17	21113	12	2
motor activity	3774	8369 obsolete molecular function	0.87474	0.40291	15.6238	0.91704	NaN	0.00562	0.00321	17	193	12	2
motor activity	3774	4875 complement receptor activity	0.92001	0.02953	1.78947	NaN	0	NaN	NaN	17	2	12	2
microtubule motor activity	3777	molecular function	0.88776	0.48883	6.99768	NaN	NaN	1	0.17283	7	21123	14	1
microtubule motor activity	3777	3774 motor activity	0.72476	0.72476	4.11765	0.95971	1	1	NaN	7	10	14	1
microtubule motor activity	3777	4875 complement receptor activity	0.85348	0.07927	1.55556	NaN	0.22222	1	NaN	7	2	14	1
actin binding	3779	molecular function	0.35743	0.67105	10.9943	0.88107	0.77647	1	1	11	21119	0	0
actin binding	3779	8092 cytoskeletal protein binding	0.54237	0.81459	4.27778	0.10818	0.79142	1	1	11	7	0	0
actin binding	3779	4875 complement receptor activity	0.71381	0.09095	1.69231	0	0.41026	1	1	11	2	0	0
defense/immunity protein activity	3793	molecular function	0.96417	0.00624	8.99617	0.86701	0.00639	1	1	9	21121	0	0
defense/immunity protein activity	3793	8369 obsolete molecular function	0.97308	0.00664	8.58247	0.12787	0.00796	1	1	9	185	0	0
defense/immunity protein activity	3793	4875 complement receptor activity	1	0.01214	1.63636	0	0.03636	1	1	9	2	0	0
lysozyme activity	3796	molecular function	0.43912	0.87283	1.99981	0.63464	0.58163	1	1	2	21128	0	0
lysozyme activity	3796	4553 hydrolase activity\, hydrolyzing O-glycosyl compounds	0.05737	1	1.5	0.14313	0.14286	1	1	2	6	0	0
lysozyme activity	3796	4875 complement receptor activity	0.46933	0.46933	1	0	1	1	1	2	2	0	0
antifungal peptide activity	3799	molecular function	0.97797	0.01071	1.99981	0.63464	0.03311	1	1	2	21128	0	0
antifungal peptide activity	3799	8369 obsolete molecular function	0.98323	0.01026	1.97938	0.00233	0.03189	1	1	2	192	0	0
antifungal peptide activity	3799	4875 complement receptor activity	1	0.04852	1	0	0.33333	1	1	2	2	0	0
blood coagulation factor activity	3801	molecular function	0.44012	0.43965	5.9983	0.83182	0.8201	1	1	6	21124	0	0
blood coagulation factor activity	3801	8369 obsolete molecular function	0.40567	0.50456	5.81443	0.03981	0.97348	1	1	6	188	0	0
blood coagulation factor activity	3801	4875 complement receptor activity	0.89196	0.05737	1.5	0	0.28571	1	1	6	2	0	0
protein-glutamine gamma-glutamyltransferase activity	3810	molecular function	0.56667	0.20092	3.99924	0.78329	0.55391	1	1	4	21126	0	0
protein-glutamine gamma-glutamyltransferase activity	3810	4875 complement receptor activity	1	0.02343	1.33333	0	0.13333	1	1	4	2	0	0
complement activity	3811	molecular function	0.1057	0.73951	5.9983	0.83182	0.40964	1	1	6	21124	0	0
complement activity	3811	8369 obsolete molecular function	0.08671	0.85172	5.81443	1.02154	0.28251	1	1	6	188	0	0
complement activity	3811	4875 complement receptor activity	0.89196	0.05737	1.5	0	0.28571	1	1	6	2	0	0
antigen binding	3823	molecular function	0.99053	0.047	1.99981	0.63464	0.07491	1	1	2	21128	0	0
antigen binding	3823	5488 binding	0.99593	0.04711	1.99587	0.63512	0.07006	1	1	2	966	0	0
antigen binding	3823	4875 complement receptor activity	1	0.04852	1	0	0.33333	1	1	2	2	0	0
catalytic activity	3824	molecular function	0.50825	0.01419	597.1	NaN	NaN	0.53479	0.93314	615	20515	5	28
catalytic activity	3824	5488 binding	0.62694	0.80141	318.585	NaN	NaN	0	NaN	615	661	5	28
3-beta-hydroxy-delta5-steroid dehydrogenase activity	3854	molecular function	0.95225	0.19723	2.99957	0.73579	0.21626	1	1	3	21127	0	0
3-beta-hydroxy-delta5-steroid dehydrogenase activity	3854	4875 complement receptor activity	1	0.03134	1.2	0	0.2	1	1	3	2	0	0
6-phosphofructo-2-kinase activity	3873	molecular function	0.28755	0.33181	1.99981	0.63464	0.96121	0.05599	1	2	21128	50	1
6-phosphofructo-2-kinase activity	3873	4875 complement receptor activity	0.46933	0.46933	1	0	1	NaN	1	2	2	50	1
AMP deaminase activity	3876	molecular function	0.54245	0.41942	2.99957	0.73579	0.94924	1	1	3	21127	0	0
AMP deaminase activity	3876	4875 complement receptor activity	1	0.03134	1.2	0	0.2	1	1	3	2	0	0
DNA-directed RNA polymerase activity	3899	molecular function	0.17132	0.98429	1.99981	0.63464	0.2075	1	1	2	21128	0	0
DNA-directed RNA polymerase activity	3899	16779 nucleotidyltransferase activity	0.21457	1	1.2	0.03416	0.4	1	1	2	3	0	0
DNA-directed RNA polymerase activity	3899	4875 complement receptor activity	0.46933	0.46933	1	0	1	1	1	2	2	0	0
GTPase activity	3924	molecular function	0.9936	0.0002	10.9943	0.88107	0.00551	1	0.00014	11	21119	36	4
GTPase activity	3924	16853 isomerase activity	0.9572	0.03513	3.4375	0.35321	0.14332	1	NaN	11	5	36	4
GTPase activity	3924	4875 complement receptor activity	0.86084	0.04811	1.69231	0	0.23077	1	NaN	11	2	36	4
small monomeric GTPase activity	3925	molecular function	0.46523	0.73143	9.99527	0.87463	0.85275	0.25033	1	10	21120	10	1
small monomeric GTPase activity	3925	8369 obsolete molecular function	0.34296	0.7373	9.48454	0.56246	0.69199	0.00284	1	10	184	10	1
small monomeric GTPase activity	3925	16853 isomerase activity	0.72476	0.48465	3.33333	0.4902	0.95305	NaN	1	10	5	10	1
small monomeric GTPase activity	3925	4875 complement receptor activity	0.48853	0.19953	1.66667	0	0.75758	NaN	1	10	2	10	1
RAB small monomeric GTPase activity	3928	molecular function	0.93054	0.15706	4.99882	0.81206	0.28947	1	1	5	21125	0	0
RAB small monomeric GTPase activity	3928	8369 obsolete molecular function	0.90464	0.21038	4.87113	0.74633	0.35971	1	1	5	189	0	0
RAB small monomeric GTPase activity	3928	16853 isomerase activity	1	0.10461	2.5	0.90119	0.30952	1	1	5	5	0	0
RAB small monomeric GTPase activity	3928	4875 complement receptor activity	0.85348	0.07927	1.42857	0	0.38095	1	1	5	2	0	0
RAS small monomeric GTPase activity	3930	molecular function	0.43738	0.9274	1.99981	0.63464	0.51244	1	1	2	21128	0	0
RAS small monomeric GTPase activity	3930	8369 obsolete molecular function	0.37297	0.94562	1.97938	1.06948	0.42147	1	1	2	192	0	0
RAS small monomeric GTPase activity	3930	16853 isomerase activity	0.70014	0.70014	1.42857	1.22342	1	1	1	2	5	0	0
RAS small monomeric GTPase activity	3930	4875 complement receptor activity	0.46933	0.46933	1	0	1	1	1	2	2	0	0
Rho small monomeric GTPase activity	3931	molecular function	0.28098	0.87178	3.99924	0.78329	0.65052	1	1	4	21126	0	0
Rho small monomeric GTPase activity	3931	8369 obsolete molecular function	0.23527	0.87789	3.91753	0.78185	0.54358	1	1	4	190	0	0
Rho small monomeric GTPase activity	3931	16853 isomerase activity	0.60004	0.60004	2.22222	0.91103	1	1	1	4	5	0	0
Rho small monomeric GTPase activity	3931	4875 complement receptor activity	0.39125	0.39125	1.33333	0	1	1	1	4	2	0	0
hydrogen-transporting two-sector ATPase activity	3936	molecular function	0.95601	0.22527	13.9907	0.89572	0.26553	1	1	14	21116	0	0
hydrogen-transporting two-sector ATPase activity	3936	8369 obsolete molecular function	0.96468	0.32665	12.9897	0.05855	0.41485	1	1	14	180	0	0
hydrogen-transporting two-sector ATPase activity	3936	16853 isomerase activity	0.86472	0.17827	3.68421	0.57488	0.3913	1	1	14	5	0	0
hydrogen-transporting two-sector ATPase activity	3936	4875 complement receptor activity	0.80746	0.0564	1.75	0	0.26667	1	1	14	2	0	0
NADH dehydrogenase activity	3954	molecular function	0.73934	0.09511	31.9515	0.93257	0.13663	1	1	32	21098	0	0
NADH dehydrogenase activity	3954	5489 electron transporter activity	0.92406	0.48021	14.3448	0.00903	0.61683	1	1	32	26	0	0
NADH dehydrogenase activity	3954	4875 complement receptor activity	0.84047	0.03826	1.88235	0	0.15344	1	1	32	2	0	0
ATP-binding cassette (ABC) transporter activity	4009	molecular function	0.63674	0.60322	4.99882	0.81206	0.95252	1	1	5	21125	0	0
ATP-binding cassette (ABC) transporter activity	4009	8369 obsolete molecular function	0.53903	0.72331	4.87113	0.25249	0.83066	1	1	5	189	0	0
ATP-binding cassette (ABC) transporter activity	4009	15662 ATPase activity\, coupled to transmembrane movement of ions\, phosphorylative mechanism	0.77815	0.10461	2.5	0.79717	0.42063	1	1	5	5	0	0
adenylosuccinate synthase activity	4019	molecular function	0.04398	0.98164	23.9727	0.92167	0.10362	0.14731	1	24	21106	8	2
adenylosuccinate synthase activity	4019	16879 ligase activity\, forming carbon-nitrogen bonds	0.84012	0.20848	4.8	0.45132	0.45218	NaN	1	24	6	8	2
alcohol dehydrogenase activity	4022	molecular function	0.74793	0.13852	1.99981	0.63464	0.34428	1	1	2	21128	0	0
alcohol dehydrogenase activity	4022	16616 oxidoreductase activity\, acting on the CH-OH group of donors\, NAD or NADP as acceptor	0.53061	0.2403	1.42857	0.54629	0.85714	1	1	2	5	0	0
alcohol dehydrogenase activity	4022	16773 phosphotransferase activity\, alcohol group as acceptor	0.68949	0.16878	1.93443	0.24608	0.44158	1	1	2	59	0	0
alcohol dehydrogenase activity\, zinc-dependent	4024	molecular function	0.74793	0.13852	1.99981	0.63464	0.34428	1	1	2	21128	0	0
alcohol dehydrogenase activity\, zinc-dependent	4024	16773 phosphotransferase activity\, alcohol group as acceptor	0.68949	0.16878	1.93443	0.24608	0.44158	1	1	2	59	0	0
3-chloroallyl aldehyde dehydrogenase activity	4028	molecular function	0.63772	0.11913	2.99957	0.73579	0.40049	1	1	3	21127	0	0
3-chloroallyl aldehyde dehydrogenase activity	4028	16773 phosphotransferase activity\, alcohol group as acceptor	0.5579	0.16245	2.85484	0.04702	0.53309	1	1	3	59	0	0
aldehyde dehydrogenase (NAD) activity	4029	molecular function	0.72764	0.06437	3.99924	0.78329	0.20091	1	1	4	21126	0	0
aldehyde dehydrogenase (NAD) activity	4029	16773 phosphotransferase activity\, alcohol group as acceptor	0.60505	0.09954	3.74603	0.01876	0.33082	1	1	4	59	0	0
aldo-keto reductase activity	4033	molecular function	0.21614	0.42764	1.99981	0.63464	0.75269	1	1	2	21128	0	0
aldo-keto reductase activity	4033	16616 oxidoreductase activity\, acting on the CH-OH group of donors\, NAD or NADP as acceptor	0.07927	0.85348	1.42857	0.18568	0.38095	1	1	2	5	0	0
aldo-keto reductase activity	4033	16773 phosphotransferase activity\, alcohol group as acceptor	0.226	0.40344	1.93443	0.06802	0.79235	1	1	2	59	0	0
arginase activity	4053	molecular function	0.02159	0.99211	7.99697	0.85783	0.05135	0.20586	1	8	21122	13	1
arginase activity	4053	16813 hydrolase activity\, acting on carbon-nitrogen (but not peptide) bonds\, in linear amidines	0.02404	1	2.66667	0.29271	0.07273	NaN	1	8	4	13	1
arginase activity	4053	16773 phosphotransferase activity\, alcohol group as acceptor	0.02638	0.98195	7.04478	0.80775	0.05198	0.00076	1	8	59	13	1
cystathionine gamma-lyase activity	4123	molecular function	0.17406	0.49172	1.99981	0.63464	0.62457	1	1	2	21128	0	0
dimethylallyltranstransferase activity	4161	molecular function	0.23332	0.22848	2.99957	0.73579	0.93881	1	1	3	21127	0	0
dimethylallyltranstransferase activity	4161	16765 transferase activity\, transferring alkyl or aryl (other than methyl) groups	0.19117	0.34092	2.86765	0.74711	0.85778	1	1	3	65	0	0
dimethylallyltranstransferase activity	4161	15399 primary active transporter activity	0.42074	0.42074	1.2	0.03777	1	1	1	3	2	0	0
endopeptidase activity	4175	molecular function	0.14182	0.53673	46.8955	0.94471	0.58646	0.38639	1	47	21083	4	2
endopeptidase activity	4175	8233 peptidase activity	0.679	0.03399	4.51923	0.00528	0.09993	NaN	1	47	5	4	2
endopeptidase activity	4175	16773 phosphotransferase activity\, alcohol group as acceptor	0.16117	0.82426	26.1604	0.00075	0.43971	0	1	47	59	4	2
endopeptidase activity	4175	15399 primary active transporter activity	0.42134	0.77833	1.91837	1.16759	0.66755	NaN	1	47	2	4	2
ATP-dependent peptidase activity	4176	molecular function	0.23563	0.69439	1.99981	0.63464	0.53802	1	1	2	21128	0	0
ATP-dependent peptidase activity	4176	8233 peptidase activity	0.28428	0.81771	1.92308	0.5147	0.4902	1	1	2	50	0	0
ATP-dependent peptidase activity	4176	16773 phosphotransferase activity\, alcohol group as acceptor	0.27059	0.75227	1.93443	0.30953	0.53016	1	1	2	59	0	0
ATP-dependent peptidase activity	4176	15399 primary active transporter activity	0.46933	1	1	0.47458	0.66667	1	1	2	2	0	0
carboxypeptidase activity	4180	molecular function	0.0803	0.62183	1.99981	NaN	0.34948	1	1	2	21128	0	0
carboxypeptidase activity	4180	15399 primary active transporter activity	0.04852	1	1	0	0.33333	1	1	2	2	0	0
metallocarboxypeptidase activity	4181	molecular function	0.0803	0.62183	1.99981	NaN	0.34948	1	1	2	21128	0	0
metallocarboxypeptidase activity	4181	15399 primary active transporter activity	0.04852	1	1	0	0.33333	1	1	2	2	0	0
carboxypeptidase A activity	4182	molecular function	0.0803	0.62183	1.99981	NaN	0.34948	1	1	2	21128	0	0
carboxypeptidase A activity	4182	15399 primary active transporter activity	0.04852	1	1	0	0.33333	1	1	2	2	0	0
aspartic-type endopeptidase activity	4190	molecular function	0.35427	0.1429	2.99957	0.73579	0.63932	1	1	3	21127	0	0
aspartic-type endopeptidase activity	4190	4175 endopeptidase activity	0.54609	0.07356	2.80851	0.0271	0.34943	1	1	3	44	0	0
aspartic-type endopeptidase activity	4190	15399 primary active transporter activity	0.42074	0.42074	1.2	0.0417	1	1	1	3	2	0	0
cysteine-type endopeptidase activity	4197	molecular function	0.41507	0.54084	23.9727	0.92167	0.89754	0.4993	1	24	21106	4	1
cysteine-type endopeptidase activity	4197	4175 endopeptidase activity	0.12922	0.02821	11.7447	0.45758	0.83978	0.00114	1	24	23	4	1
cysteine-type endopeptidase activity	4197	15399 primary active transporter activity	0.58241	0.87359	1.84615	1.0871	0.73623	NaN	1	24	2	4	1
ubiquitin thiolesterase activity	4221	molecular function	0.16567	0.85696	18.9829	0.91142	0.41708	0.42164	1	19	21111	5	1
ubiquitin thiolesterase activity	4221	15399 primary active transporter activity	0.47437	0.92048	1.80952	1.03798	0.58967	NaN	1	19	2	5	1
metalloendopeptidase activity	4222	molecular function	0.26867	0.47073	5.9983	0.83182	0.73151	1	1	6	21124	0	0
metalloendopeptidase activity	4222	4175 endopeptidase activity	0.41967	0.4763	5.23404	0.05834	0.81103	1	1	6	41	0	0
metalloendopeptidase activity	4222	15399 primary active transporter activity	0.35737	0.63297	1.5	0.24549	0.85714	1	1	6	2	0	0
serine-type endopeptidase activity	4252	molecular function	0.12568	0.90736	11.9932	0.88661	0.38654	0.29233	1	12	21118	8	1
serine-type endopeptidase activity	4252	4175 endopeptidase activity	0.34787	0.96429	8.93617	0.17531	0.55	0.00057	1	12	35	8	1
serine-type endopeptidase activity	4252	15399 primary active transporter activity	0.3182	0.88053	1.71429	0.96258	0.54945	NaN	1	12	2	8	1
chymotrypsin activity	4263	molecular function	0.35793	0.68953	7.99697	0.85783	0.86168	1	1	8	21122	0	0
chymotrypsin activity	4263	4252 serine-type endopeptidase activity	1	0.19074	2.66667	0.00907	0.28283	1	1	8	4	0	0
chymotrypsin activity	4263	8236 serine-type peptidase activity	1	0.19074	2.66667	0.00907	0.28283	1	1	8	4	0	0
chymotrypsin activity	4263	15399 primary active transporter activity	0.33851	0.76277	1.6	0.39519	0.71111	1	1	8	2	0	0
subtilase activity	4289	molecular function	0.20577	0.99912	1.99981	0.63464	0.19788	0.05599	1	2	21128	50	1
subtilase activity	4289	4252 serine-type endopeptidase activity	0.19953	1	1.66667	0.00108	0.27273	NaN	1	2	10	50	1
subtilase activity	4289	15399 primary active transporter activity	0.46933	1	1	0.36627	0.66667	NaN	1	2	2	50	1
trypsin activity	4295	molecular function	0.27694	0.58074	8.99617	0.86701	0.89713	1	1	9	21121	0	0
trypsin activity	4295	4252 serine-type endopeptidase activity	1	0.07818	2.25	0.00327	0.14545	1	1	9	3	0	0
trypsin activity	4295	15399 primary active transporter activity	0.33191	0.71148	1.63636	0.33533	0.72727	1	1	9	2	0	0
proteasome endopeptidase activity	4299	molecular function	0.34013	0.0868	2.99957	0.73579	0.56175	1	1	3	21127	0	0
proteasome endopeptidase activity	4299	8369 obsolete molecular function	0.2808	0.11689	2.95361	0.00226	0.74017	1	1	3	191	0	0
proteasome endopeptidase activity	4299	15399 primary active transporter activity	0.42074	0.42074	1.2	0.00544	1	1	1	3	2	0	0
epoxide hydrolase activity	4301	molecular function	0.58029	0.45577	2.99957	0.73579	0.87637	1	1	3	21127	0	0
epoxide hydrolase activity	4301	15399 primary active transporter activity	0.42074	0.90829	1.2	0.74601	0.8	1	1	3	2	0	0
exo-alpha-sialidase activity	4308	molecular function	0.82246	0.00306	3.99924	0.78329	0.01987	1	1	4	21126	0	0
exo-alpha-sialidase activity	4308	16773 phosphotransferase activity\, alcohol group as acceptor	0.73331	0.00557	3.74603	0.00106	0.05709	1	1	4	59	0	0
exo-alpha-sialidase activity	4308	15399 primary active transporter activity	1	0.12107	1.33333	0.01234	0.26667	1	1	4	2	0	0
fructose-2\,6-bisphosphate 2-phosphatase activity	4331	molecular function	0.28755	0.33181	1.99981	0.63464	0.96121	0.05599	1	2	21128	50	1
fructose-2\,6-bisphosphate 2-phosphatase activity	4331	15399 primary active transporter activity	0.46933	0.46933	1	0.2284	1	NaN	1	2	2	50	1
geranyltranstransferase activity	4337	molecular function	0.23332	0.22848	2.99957	0.73579	0.93881	1	1	3	21127	0	0
geranyltranstransferase activity	4337	4659 prenyltransferase activity	0.64169	0.45443	2.35714	0.02097	0.87363	1	1	3	11	0	0
geranyltranstransferase activity	4337	15399 primary active transporter activity	0.42074	0.42074	1.2	0.03777	1	1	1	3	2	0	0
glutathione transferase activity	4364	molecular function	0.10979	0.9898	8.99617	0.86701	0.12539	0.22842	1	9	21121	11	1
glutathione transferase activity	4364	16765 transferase activity\, transferring alkyl or aryl (other than methyl) groups	0.03715	0.99943	7.80882	0.89206	0.08229	NaN	1	9	59	11	1
glutathione transferase activity	4364	16209 antioxidant activity	0.09019	1	3.21429	0.01436	0.13886	NaN	1	9	5	11	1
helicase activity	4386	molecular function	0.55742	0.76541	1.99981	0.63464	0.80923	1	1	2	21128	0	0
helicase activity	4386	3824 catalytic activity	0.50603	0.76324	1.9935	0.63541	0.75435	1	1	2	613	0	0
helicase activity	4386	16209 antioxidant activity	0.37151	0.70014	1.42857	0.07412	0.85714	1	1	2	5	0	0
inositol or phosphatidylinositol phosphodiesterase activity	4434	molecular function	0.33214	0.75981	2.99957	0.73579	0.56258	1	1	3	21127	0	0
inositol or phosphatidylinositol phosphodiesterase activity	4434	16773 phosphotransferase activity\, alcohol group as acceptor	0.31251	0.80604	2.85484	0.77934	0.57706	1	1	3	59	0	0
inositol or phosphatidylinositol phosphodiesterase activity	4434	16209 antioxidant activity	0.45457	0.97834	1.875	0.03389	0.57143	1	1	3	5	0	0
phosphoinositide phospholipase C activity	4435	molecular function	0.33214	0.75981	2.99957	0.73579	0.56258	1	1	3	21127	0	0
phosphoinositide phospholipase C activity	4435	16209 antioxidant activity	0.45457	0.97834	1.875	0.03389	0.57143	1	1	3	5	0	0
leukotriene-A4 hydrolase activity	4463	molecular function	0.58029	0.45577	2.99957	0.73579	0.87637	1	1	3	21127	0	0
leukotriene-A4 hydrolase activity	4463	16209 antioxidant activity	0.57839	0.7044	1.875	0.15395	1	1	1	3	5	0	0
monooxygenase activity	4497	molecular function	0.05062	0.94788	20.9791	NaN	NaN	0.11833	1	21	21109	10	2
monooxygenase activity	4497	16491 oxidoreductase activity	0.01709	1	16.9541	0.94143	NaN	0	1	21	88	10	2
monooxygenase activity	4497	16773 phosphotransferase activity\, alcohol group as acceptor	0.06472	0.99079	15.4875	0.9523	NaN	0	1	21	59	10	2
monooxygenase activity	4497	16209 antioxidant activity	0.05715	0.90973	4.03846	1.13864	0.05915	NaN	1	21	5	10	2
kynurenine 3-monooxygenase activity	4502	molecular function	0.21365	0.42764	1.99981	0.63464	0.74948	1	1	2	21128	0	0
kynurenine 3-monooxygenase activity	4502	16709 oxidoreductase activity\, acting on paired donors\, with incorporation or reduction of molecular oxygen\, NAD or NADH as one donor\, and incorporation of one atom of oxygen	0.66835	0.32651	1.69231	0.68179	0	1	1	2	11	0	0
kynurenine 3-monooxygenase activity	4502	16705 oxidoreductase activity\, acting on paired donors\, with incorporation or reduction of molecular oxygen	0.39964	0.39964	1.84615	0.65543	0.96163	1	1	2	24	0	0
kynurenine 3-monooxygenase activity	4502	16209 antioxidant activity	0.07927	1	1.42857	0.32087	0.19048	1	1	2	5	0	0
nuclease activity	4518	molecular function	0.16393	0.60557	10.9943	0.88107	0.61297	1	1	11	21119	0	0
nuclease activity	4518	16788 hydrolase activity\, acting on ester bonds	0.4463	0.73986	8.11905	0.01674	0.83008	1	1	11	31	0	0
nuclease activity	4518	16705 oxidoreductase activity\, acting on paired donors\, with incorporation or reduction of molecular oxygen	0.68386	0.37355	7.72973	0.93921	0.51693	1	1	11	26	0	0
nuclease activity	4518	16209 antioxidant activity	0.2071	0.93394	3.4375	0.28741	0.21154	1	1	11	5	0	0
endonuclease activity	4519	molecular function	0.71688	0.50885	1.99981	0.63464	0.77764	1	1	2	21128	0	0
endonuclease activity	4519	4518 nuclease activity	0.71148	0.33191	1.63636	0.09924	0.69091	1	1	2	9	0	0
endonuclease activity	4519	16705 oxidoreductase activity\, acting on paired donors\, with incorporation or reduction of molecular oxygen	0.85382	0.42299	1.85714	0.65378	0.56203	1	1	2	26	0	0
endonuclease activity	4519	16209 antioxidant activity	0.37151	0.37151	1.42857	0.05527	1	1	1	2	5	0	0
exonuclease activity	4527	molecular function	0.12255	0.72016	6.99768	0.84644	0.52941	1	1	7	21123	0	0
exonuclease activity	4527	4518 nuclease activity	0.59461	0.74646	2.54545	0.58626	0.72121	1	1	7	4	0	0
exonuclease activity	4527	16209 antioxidant activity	0.15046	1	2.91667	0.34342	0.19444	1	1	7	5	0	0
deoxyribonuclease activity	4536	molecular function	0.83602	0.38585	2.99957	0.73579	0.62719	1	1	3	21127	0	0
deoxyribonuclease activity	4536	4518 nuclease activity	1	0.37901	2.18182	0.52664	0.32727	1	1	3	8	0	0
deoxyribonuclease activity	4536	16209 antioxidant activity	0.57839	0.57839	1.875	0.2132	1	1	1	3	5	0	0
caspase-activated deoxyribonuclease activity	4537	molecular function	0.28776	0.50948	1.99981	0.63464	0.77027	1	1	2	21128	0	0
caspase-activated deoxyribonuclease activity	4537	16209 antioxidant activity	0.2403	1	1.42857	0.949	0.38095	1	1	2	5	0	0
hydrolase activity\, hydrolyzing O-glycosyl compounds	4553	molecular function	0.69157	0.04844	7.99697	0.85783	0.13732	1	1	8	21122	0	0
hydrolase activity\, hydrolyzing O-glycosyl compounds	4553	16798 hydrolase activity\, acting on glycosyl bonds	0.54373	0.93454	1.6	0.60514	0.71111	1	1	8	2	0	0
hydrolase activity\, hydrolyzing O-glycosyl compounds	4553	19205 nucleobase\, nucleoside\, nucleotide kinase activity	0.76277	0.0874	1.6	0.33493	0.4	1	1	8	2	0	0
hydrolase activity\, hydrolyzing O-glycosyl compounds	4553	16209 antioxidant activity	0.62568	0.05336	3.07692	0.10689	0.28438	1	1	8	5	0	0
chitinase activity	4568	molecular function	0.097	0.94771	1.99981	0.63464	0.17399	1	1	2	21128	0	0
chitinase activity	4568	4553 hydrolase activity\, hydrolyzing O-glycosyl compounds	0.01631	1	1.5	0.08258	0.07143	1	1	2	6	0	0
chitinase activity	4568	19205 nucleobase\, nucleoside\, nucleotide kinase activity	0.04852	1	1	0.34161	0.33333	1	1	2	2	0	0
chitinase activity	4568	16209 antioxidant activity	0.01905	1	1.42857	0.25098	0.09524	1	1	2	5	0	0
peroxidase activity	4601	molecular function	0.45488	0.14047	4.99882	0.81206	0.46247	1	1	5	21125	0	0
glutathione peroxidase activity	4602	molecular function	0.39201	0.41418	1.99981	0.63464	0.99514	1	1	2	21128	0	0
glutathione peroxidase activity	4602	4601 peroxidase activity	0.21457	1	1.2	0.97638	0.4	1	1	2	3	0	0
glutathione peroxidase activity	4602	16684 oxidoreductase activity\, acting on peroxide as acceptor	0.21457	1	1.2	0.97638	0.4	1	1	2	3	0	0
glutathione peroxidase activity	4602	16209 antioxidant activity	0.21457	1	1.2	0.97638	0.4	1	1	2	3	0	0
phosphatidylcholine-sterol O-acyltransferase activity	4607	molecular function	0.6621	0.55911	17.9847	0.90884	0.65241	1	1	18	21112	0	0
phosphatidylcholine-sterol O-acyltransferase activity	4607	8757 S-adenosylmethionine-dependent methyltransferase activity	0.29011	0.91862	14.3596	0.93783	0.55697	1	1	18	71	0	0
phosphatidylcholine-sterol O-acyltransferase activity	4607	16209 antioxidant activity	0.24585	0.48878	3.91304	0.05181	0.68185	1	1	18	5	0	0
phosphoglucomutase activity	4614	molecular function	0.24217	0.94666	2.99957	0.73579	0.34606	1	1	3	21127	0	0
phosphoglucomutase activity	4614	8757 S-adenosylmethionine-dependent methyltransferase activity	0.08826	0.99424	2.87838	0.74615	0.12481	1	1	3	71	0	0
phosphoglucomutase activity	4614	16209 antioxidant activity	0.11192	1	1.875	0.1186	0.14286	1	1	3	5	0	0
phospholipase activity	4620	molecular function	0.8846	0.13382	9.99527	0.87463	0.24187	1	1	10	21120	0	0
phospholipase activity	4620	16209 antioxidant activity	0.64427	0.3245	2.85714	0.13117	0.94505	1	1	10	4	0	0
phospholipase A2 activity	4623	molecular function	0.91593	0.12928	6.99768	0.84644	0.07543	1	1	7	21123	0	0
phospholipase A2 activity	4623	4620 phospholipase activity	1	0.17079	2.1	0.21478	0.26667	1	1	7	3	0	0
phospholipase A2 activity	4623	16209 antioxidant activity	0.81623	0.12501	2.54545	0.3308	0.52727	1	1	7	4	0	0
phospholipase C activity	4629	molecular function	0.33214	0.75981	2.99957	0.73579	0.56258	1	1	3	21127	0	0
phospholipase C activity	4629	4620 phospholipase activity	0.17079	1	2.1	0.21478	0.26667	1	1	3	7	0	0
phospholipase C activity	4629	16209 antioxidant activity	0.45457	0.97834	1.875	0.03389	0.57143	1	1	3	5	0	0
prenyltransferase activity	4659	molecular function	0.10409	0.31737	13.9907	0.89572	0.89908	1	0.31584	14	21116	7	1
prenyltransferase activity	4659	16765 transferase activity\, transferring alkyl or aryl (other than methyl) groups	0.04138	0.55872	11.1176	0.92913	0.49967	1	NaN	14	54	7	1
prenyltransferase activity	4659	16791 phosphoric monoester hydrolase activity	0.81453	0.08856	8.55556	0.33402	0.26279	1	NaN	14	22	7	1
protein-arginine deiminase activity	4668	molecular function	0.93198	0.17962	3.99924	0.78329	0.24237	1	1	4	21126	0	0
protein-arginine deiminase activity	4668	16813 hydrolase activity\, acting on carbon-nitrogen (but not peptide) bonds\, in linear amidines	1	0.02404	2.66667	0.29271	0.07273	1	1	4	8	0	0
protein-arginine deiminase activity	4668	16791 phosphoric monoester hydrolase activity	0.93481	0.05795	3.38462	0.40625	0.12646	1	1	4	22	0	0
protein kinase activity	4672	molecular function	0.5777	0.71357	67.7812	0.95426	0.9419	0.57822	0.54527	68	21062	6	4
protein kinase activity	4672	16301 kinase activity	0.66855	0.18925	11.6098	0.00144	0.65284	NaN	NaN	68	14	6	4
protein kinase activity	4672	16773 phosphotransferase activity\, alcohol group as acceptor	0.21775	0.71993	3.77778	0.00105	0.41018	NaN	NaN	68	4	6	4
protein kinase activity	4672	8757 S-adenosylmethionine-dependent methyltransferase activity	0.08176	0.87403	33.2331	1.00151	NaN	NaN	NaN	68	65	6	4
protein serine/threonine kinase activity	4674	molecular function	0.53158	0.83352	51.872	0.94751	0.90925	0.43596	0.75612	52	21078	6	3
protein serine/threonine kinase activity	4674	4672 protein kinase activity	0.55342	0.83701	12.2353	0.87003	0.59768	NaN	0.00246	52	16	6	3
protein serine/threonine kinase activity	4674	8757 S-adenosylmethionine-dependent methyltransferase activity	0.07114	0.91449	28.8889	0.992	0.09271	NaN	NaN	52	65	6	3
receptor signaling protein serine/threonine kinase activity	4702	molecular function	0.77821	0.29914	7.99697	0.85783	0.54771	1	1	8	21122	0	0
receptor signaling protein serine/threonine kinase activity	4702	4674 protein serine/threonine kinase activity	0.82093	0.2373	6.76923	0.10452	0.45431	1	1	8	44	0	0
receptor signaling protein serine/threonine kinase activity	4702	5057 receptor signaling protein activity	0.39219	0.45543	4.44444	0.08116	0.88002	1	1	8	10	0	0
receptor signaling protein serine/threonine kinase activity	4702	8757 S-adenosylmethionine-dependent methyltransferase activity	0.34403	0.29512	7.18987	0.87754	0.95464	1	1	8	71	0	0
NF-kappaB-inducing kinase activity	4704	molecular function	0.85257	0.13177	5.9983	0.83182	0.24392	1	1	6	21124	0	0
NF-kappaB-inducing kinase activity	4704	4702 receptor signaling protein serine/threonine kinase activity	0.89196	0.05737	1.5	0.32081	0.28571	1	1	6	2	0	0
NF-kappaB-inducing kinase activity	4704	5057 receptor signaling protein activity	0.85317	0.23952	3.75	0.16706	0.61713	1	1	6	10	0	0
NF-kappaB-inducing kinase activity	4704	8757 S-adenosylmethionine-dependent methyltransferase activity	0.90143	0.13156	5.53247	0.84858	0.48789	1	1	6	71	0	0
MAP kinase kinase kinase activity	4709	molecular function	0.1355	0.67439	1.99981	0.63464	0.41462	1	1	2	21128	0	0
MAP kinase kinase kinase activity	4709	4702 receptor signaling protein serine/threonine kinase activity	0.05737	0.89196	1.5	0.32081	0.28571	1	1	2	6	0	0
MAP kinase kinase kinase activity	4709	5057 receptor signaling protein activity	0.05696	0.95622	1.66667	0.17262	0.18182	1	1	2	10	0	0
MAP kinase kinase kinase activity	4709	8757 S-adenosylmethionine-dependent methyltransferase activity	0.05444	0.88216	1.94521	0.64151	0.17109	1	1	2	71	0	0
protein-tyrosine kinase activity	4713	molecular function	0.37909	0.88137	37.9317	0.93831	0.55351	0.29303	1	38	21092	5	2
protein-tyrosine kinase activity	4713	4672 protein kinase activity	0.13692	0.81485	16.7647	0.01917	0.38049	NaN	1	38	30	5	2
protein-tyrosine kinase activity	4713	5057 receptor signaling protein activity	0.27987	0.62469	7.91667	0.80645	0.56786	NaN	1	38	10	5	2
protein-tyrosine kinase activity	4713	8757 S-adenosylmethionine-dependent methyltransferase activity	0.07052	0.91472	24.7523	0.97636	0.1049	NaN	1	38	71	5	2
transmembrane receptor protein tyrosine kinase activity	4714	molecular function	0.71244	0.33162	21.9771	0.91801	0.56314	1	1	22	21108	0	0
transmembrane receptor protein tyrosine kinase activity	4714	4713 protein-tyrosine kinase activity	0.87848	0.02197	9.26316	0.00597	0.14333	1	1	22	16	0	0
transmembrane receptor protein tyrosine kinase activity	4714	8757 S-adenosylmethionine-dependent methyltransferase activity	0.34238	0.93984	16.7957	0.94944	0.64474	1	1	22	71	0	0
phosphoprotein phosphatase activity	4721	molecular function	0.17674	0.5052	12.992	0.89145	0.98786	1	1	13	21117	0	0
phosphoprotein phosphatase activity	4721	16791 phosphoric monoester hydrolase activity	0.85976	0.02567	5.31818	0.00283	0.02524	1	1	13	9	0	0
phosphoprotein phosphatase activity	4721	8757 S-adenosylmethionine-dependent methyltransferase activity	0.05139	0.83832	10.9881	0.91657	0.21847	1	1	13	71	0	0
protein tyrosine phosphatase activity	4725	molecular function	0.23658	0.55775	5.9983	0.83182	0.76925	1	1	6	21124	0	0
protein tyrosine phosphatase activity	4725	4721 phosphoprotein phosphatase activity	0.41895	0.75271	3.23077	0.74301	0.83566	1	1	6	7	0	0
protein tyrosine phosphatase activity	4725	8757 S-adenosylmethionine-dependent methyltransferase activity	0.09745	0.91107	5.53247	0.84858	0.27034	1	1	6	71	0	0
pyrroline-5-carboxylate reductase activity	4735	molecular function	0.24141	0.66192	1.99981	0.63464	0.573	1	1	2	21128	0	0
pyrroline-5-carboxylate reductase activity	4735	16646 oxidoreductase activity\, acting on the CH-NH group of donors\, NAD or NADP as acceptor	0.04852	1	1	0.63759	0.33333	1	1	2	2	0	0
pyrroline-5-carboxylate reductase activity	4735	5057 receptor signaling protein activity	0.19953	0.95622	1.66667	0.2993	0.36364	1	1	2	10	0	0
pyrroline-5-carboxylate reductase activity	4735	8757 S-adenosylmethionine-dependent methyltransferase activity	0.11163	0.88216	1.94521	0.64151	0.25757	1	1	2	71	0	0
pyruvate kinase activity	4743	molecular function	0.99996	0.01427	1.99981	0.63464	0.02708	1	0.05276	2	21128	50	1
pyruvate kinase activity	4743	16301 kinase activity	1	0.01351	1.94805	0.00984	0.02825	1	0.00019	2	75	50	1
pyruvate kinase activity	4743	16773 phosphotransferase activity\, alcohol group as acceptor	1	0.01494	1.9322	0.01353	0.03099	1	0.00019	2	57	50	1
pyruvate kinase activity	4743	8757 S-adenosylmethionine-dependent methyltransferase activity	1	0.01435	1.94521	0.64151	0.02927	1	NaN	2	71	50	1
spermidine synthase activity	4766	molecular function	0.75124	0.09124	43.9084	NaN	NaN	1	1	44	21086	0	0
spermidine synthase activity	4766	16765 transferase activity\, transferring alkyl or aryl (other than methyl) groups	0.94403	0.05729	15.5294	1.02957	0.0965	1	1	44	24	0	0
spermidine synthase activity	4766	16773 phosphotransferase activity\, alcohol group as acceptor	0.56565	0.27928	25.2039	0.98873	NaN	1	1	44	59	0	0
spermidine synthase activity	4766	8757 S-adenosylmethionine-dependent methyltransferase activity	0.42893	0.85152	16.7324	1.02312	0.34939	1	1	44	27	0	0
steroid delta-isomerase activity	4769	molecular function	0.93759	0.40315	1.99981	0.63464	0.4443	1	1	2	21128	0	0
steroid delta-isomerase activity	4769	16773 phosphotransferase activity\, alcohol group as acceptor	0.95702	0.38891	1.93443	0.96952	0.42966	1	1	2	59	0	0
steroid delta-isomerase activity	4769	8757 S-adenosylmethionine-dependent methyltransferase activity	0.71482	0.39354	1.94521	0.64151	0.6727	1	1	2	71	0	0
superoxide dismutase activity	4784	molecular function	0.40922	0.40603	9.99527	0.87463	0.99125	1	1	10	21120	0	0
superoxide dismutase activity	4784	8757 S-adenosylmethionine-dependent methyltransferase activity	0.10212	0.90572	8.76543	0.89676	0.28478	1	1	10	71	0	0
copper\, zinc superoxide dismutase activity	4785	molecular function	0.40922	0.40603	9.99527	0.87463	0.99125	1	1	10	21120	0	0
copper\, zinc superoxide dismutase activity	4785	8757 S-adenosylmethionine-dependent methyltransferase activity	0.10212	0.90572	8.76543	0.89676	0.28478	1	1	10	71	0	0
thyroxine 5'-deiodinase activity	4800	molecular function	0.59784	0.83547	1.99981	0.63464	0.77094	1	1	2	21128	0	0
thyroxine 5'-deiodinase activity	4800	16491 oxidoreductase activity	0.51807	0.86281	1.9633	0.63918	0.67616	1	1	2	107	0	0
tRNA (guanine-N2-)-methyltransferase activity	4809	molecular function	0.98203	0.04426	1.99981	0.63464	0.07841	1	1	2	21128	0	0
tRNA ligase activity	4812	molecular function	0.52813	0.14912	37.9317	0.93831	0.35328	0.66567	1	38	21092	3	1
glutamate-tRNA ligase activity	4818	molecular function	0.25236	0.88094	3.99924	0.78329	0.39395	0.10884	1	4	21126	25	1
glutamate-tRNA ligase activity	4818	4812 tRNA ligase activity	0.16847	0.99815	3.57895	0.00403	0.27393	NaN	1	4	34	25	1
glutamate-tRNA ligase activity	4818	16876 ligase activity\, forming aminoacyl-tRNA and related compounds	0.14277	1	3.56757	0.00342	0.24042	NaN	1	4	33	25	1
glutamine-tRNA ligase activity	4819	molecular function	0.25236	0.88094	3.99924	0.78329	0.39395	0.10884	1	4	21126	25	1
glutamine-tRNA ligase activity	4819	4812 tRNA ligase activity	0.16847	0.99815	3.57895	0.00403	0.27393	NaN	1	4	34	25	1
glutamine-tRNA ligase activity	4819	16876 ligase activity\, forming aminoacyl-tRNA and related compounds	0.14277	1	3.56757	0.00342	0.24042	NaN	1	4	33	25	1
isoleucine-tRNA ligase activity	4822	molecular function	0.53354	0.03436	21.9771	0.91801	0.14065	1	1	22	21108	0	0
isoleucine-tRNA ligase activity	4822	4812 tRNA ligase activity	0.8261	0.09258	9.26316	0.00217	0.20359	1	1	22	16	0	0
isoleucine-tRNA ligase activity	4822	16876 ligase activity\, forming aminoacyl-tRNA and related compounds	0.79044	0.12524	8.91892	0.0018	0.3073	1	1	22	15	0	0
threonine-tRNA ligase activity	4829	molecular function	0.2293	0.58107	7.99697	0.85783	0.83149	1	1	8	21122	0	0
threonine-tRNA ligase activity	4829	4812 tRNA ligase activity	0.09167	0.9524	6.31579	0.44892	0.34267	1	1	8	30	0	0
threonine-tRNA ligase activity	4829	16876 ligase activity\, forming aminoacyl-tRNA and related compounds	0.07485	0.95628	6.27027	0.45074	0.2764	1	1	8	29	0	0
tubulin-tyrosine ligase activity	4835	molecular function	0.66701	0.47628	1.99981	0.63464	0.79435	1	1	2	21128	0	0
tubulin-tyrosine ligase activity	4835	16881 acid-amino acid ligase activity	1	0.39125	1.33333	0.98952	0.53333	1	1	2	4	0	0
tubulin-tyrosine ligase activity	4835	16876 ligase activity\, forming aminoacyl-tRNA and related compounds	0.5156	0.37174	1.89744	0.30757	0.87352	1	1	2	37	0	0
ubiquitin conjugating enzyme activity	4840	molecular function	0.13873	0.63865	7.99697	0.85783	0.42631	1	0.19496	8	21122	13	1
ubiquitin conjugating enzyme activity	4840	16876 ligase activity\, forming aminoacyl-tRNA and related compounds	0.06746	0.79255	6.57778	0.01395	0.17204	1	NaN	8	37	13	1
ubiquitin-protein ligase activity	4842	molecular function	0.0828	0.82963	2.99957	0.73579	0.17541	1	1	3	21127	0	0
ubiquitin-protein ligase activity	4842	16881 acid-amino acid ligase activity	0.63297	0.63297	1.5	0.04454	1	1	1	3	3	0	0
ubiquitin-protein ligase activity	4842	16876 ligase activity\, forming aminoacyl-tRNA and related compounds	0.04366	0.98016	2.775	0.34927	0.06829	1	1	3	37	0	0
ubiquitin-specific protease activity	4843	molecular function	0.16567	0.85696	18.9829	0.91142	0.41708	0.42164	1	19	21111	5	1
ubiquitin-specific protease activity	4843	8234 cysteine-type peptidase activity	0.34596	0.97095	4.56	0.27055	0.23905	NaN	1	19	6	5	1
ubiquitin-specific protease activity	4843	16876 ligase activity\, forming aminoacyl-tRNA and related compounds	0.03396	0.92982	12.0577	0.00347	0.14337	NaN	1	19	33	5	1
uridine kinase activity	4849	molecular function	0.31021	0.42063	1.99981	0.63464	0.88849	1	1	2	21128	0	0
uridine kinase activity	4849	16876 ligase activity\, forming aminoacyl-tRNA and related compounds	0.1462	0.5925	1.89744	0.32491	0.50376	1	1	2	37	0	0
enzyme inhibitor activity	4857	molecular function	0.5623	0.25909	26.9655	0.92634	0.76217	0.5408	1	27	21103	4	1
enzyme inhibitor activity	4857	30234 enzyme regulator activity	0.65632	0.11665	13.2453	0.67278	0.5812	NaN	1	27	26	4	1
phospholipase inhibitor activity	4859	molecular function	0.97472	0.01224	2.99957	0.73579	0.04587	1	1	3	21127	0	0
phospholipase inhibitor activity	4859	4857 enzyme inhibitor activity	1	0.01003	2.66667	0.46079	0.02519	1	1	3	24	0	0
endopeptidase inhibitor activity	4866	molecular function	0.28222	0.20765	5.9983	0.83182	0.69467	1	1	6	21124	0	0
endopeptidase inhibitor activity	4866	19887 protein kinase regulator activity	0.09555	0.80453	3.23077	0.9408	0.4662	1	1	6	7	0	0
serine-type endopeptidase inhibitor activity	4867	molecular function	0.97892	0.23501	1.99981	0.63464	0.25065	1	1	2	21128	0	0
serine-type endopeptidase inhibitor activity	4867	4866 endopeptidase inhibitor activity	1	0.02343	1.33333	0.01428	0.13333	1	1	2	4	0	0
serine-type endopeptidase inhibitor activity	4867	19887 protein kinase regulator activity	0.82322	0.34676	1.55556	0.38147	0.66667	1	1	2	7	0	0
cysteine protease inhibitor activity	4869	molecular function	0.08905	0.33695	3.99924	0.78329	0.74019	1	1	4	21126	0	0
cysteine protease inhibitor activity	4869	4866 endopeptidase inhibitor activity	0.02343	1	1.33333	0.01428	0.13333	1	1	4	2	0	0
cysteine protease inhibitor activity	4869	19887 protein kinase regulator activity	0.03881	0.87813	2.54545	0.03256	0.17576	1	1	4	7	0	0
signal transducer activity	4871	molecular function	0.28679	0.3769	370.274	NaN	NaN	0.61229	0.7818	377	20753	5	18
signal transducer activity	4871	4866 endopeptidase inhibitor activity	0.3224	0.06006	4.93455	1.18512	0.63191	NaN	NaN	377	5	5	18
signal transducer activity	4871	19887 protein kinase regulator activity	0.54812	0.68667	4.93455	1.18512	0.72893	NaN	NaN	377	5	5	18
receptor activity	4872	molecular function	0.87258	0.54828	177.484	NaN	NaN	0.74817	0.51748	179	20951	5	9
receptor activity	4872	4871 signal transducer activity	0.66058	0.58681	94.0106	NaN	NaN	0	NaN	179	198	5	9		377
receptor activity	4872	19887 protein kinase regulator activity	0.24484	0.91021	6.73656	1.1462	0.35405	NaN	NaN	179	7	5	9
complement receptor activity	4875	molecular function	0.0803	0.62183	1.99981	NaN	0.34948	1	1	2	21128	0	0
complement receptor activity	4875	4888 transmembrane receptor activity	0.05829	0.71748	1.9633	NaN	0.2542	1	1	2	107	0	0
complement component C3b receptor activity	4877	molecular function	0.0803	0.62183	1.99981	NaN	0.34948	1	1	2	21128	0	0
ligand-dependent nuclear receptor activity	4879	molecular function	0.18765	0.99249	2.99957	0.73579	0.20041	1	1	3	21127	0	0
ligand-dependent nuclear receptor activity	4879	4872 receptor activity	0.17679	0.99623	2.94972	0.73994	0.17217	1	1	3	176	0	0
ligand-dependent nuclear receptor activity	4879	4875 complement receptor activity	0.21457	0.6806	1.2	0	0.8	1	1	3	2	0	0
transmembrane receptor activity	4888	molecular function	0.76602	0.33277	108.438	NaN	NaN	0.95707	0.16433	109	21021	6	6
transmembrane receptor activity	4888	4872 receptor activity	0.2177	0.28988	42.6257	1.01279	0.93286	0.0154	NaN	109	70	6	6
nicotinic acetylcholine-activated cation-selective channel activity	4889	molecular function	0.74042	0.09186	2.99957	0.73579	0.19821	1	1	3	21127	0	0
nicotinic acetylcholine-activated cation-selective channel activity	4889	5261 cation channel activity	0.63907	0.1668	2.59091	0.18379	0.38894	1	1	3	19	0	0
nicotinic acetylcholine-activated cation-selective channel activity	4889	4875 complement receptor activity	1	0.03134	1.2	0	0.2	1	1	3	2	0	0
cell adhesion receptor activity	4895	molecular function	0.43743	0.84159	10.9943	0.88107	0.55314	1	0.25785	11	21119	9	1
cell adhesion receptor activity	4895	8369 obsolete molecular function	0.25494	0.82835	10.3763	0.02474	0.34866	1	0.00156	11	183	9	1
cell adhesion receptor activity	4895	5254 chloride channel activity	0.12055	0.89722	5.73913	0.02218	0.14758	1	NaN	11	12	9	1
cell adhesion receptor activity	4895	4875 complement receptor activity	0.54916	0.15952	1.69231	0	0.64103	1	NaN	11	2	9	1
hematopoietin/interferon-class (D200-domain) cytokine receptor activity	4896	molecular function	0.08578	0.69275	4.99882	0.81206	0.50844	1	1	5	21125	0	0
hematopoietin/interferon-class (D200-domain) cytokine receptor activity	4896	4888 transmembrane receptor activity	0.09948	0.83815	4.77064	0.82232	0.42988	1	1	5	104	0	0
hematopoietin/interferon-class (D200-domain) cytokine receptor activity	4896	5254 chloride channel activity	0.02324	0.94291	3.52941	0.10776	0.15514	1	1	5	12	0	0
hematopoietin/interferon-class (D200-domain) cytokine receptor activity	4896	4875 complement receptor activity	0.85348	0.07927	1.42857	0	0.38095	1	1	5	2	0	0
G-protein coupled receptor activity	4930	molecular function	0.88463	0.58141	81.6818	NaN	NaN	0.90621	0.17441	82	21048	6	5
G-protein coupled receptor activity	4930	4888 transmembrane receptor activity	0.51812	0.22776	20.3119	1.0437	0.60835	NaN	NaN	82	27	6	5
bombesin receptor activity	4946	molecular function	0.88654	0.1818	1.99981	0.63464	0.29681	1	1	2	21128	0	0
bombesin receptor activity	4946	5261 cation channel activity	0.7789	0.29838	1.83333	0.84707	0.56549	1	1	2	22	0	0
chemokine receptor activity	4950	molecular function	0.99867	0.0027	2.99957	0.73579	0.00606	1	0.0021	3	21127	67	2
histamine receptor activity	4969	molecular function	0.01089	0.90234	5.9983	0.83182	0.11309	1	1	6	21124	0	0
neuropeptide Y receptor activity	4983	molecular function	0.88654	0.1818	1.99981	0.63464	0.29681	1	1	2	21128	0	0
neuropeptide Y receptor activity	4983	15464 acetylcholine receptor activity	0.90829	0.42074	1.2	0.45708	0.8	1	1	2	3	0	0
olfactory receptor activity	4984	molecular function	0.00111	0.99868	4.99882	0.81206	0.00193	0.13415	1	5	21125	20	1
olfactory receptor activity	4984	1584 rhodopsin-like receptor activity	0.00039	1	4.65753	0.82771	0.00172	NaN	1	5	68	20	1
olfactory receptor activity	4984	15464 acetylcholine receptor activity	0.00724	1	1.875	0.08148	0.03571	NaN	1	5	3	20	1
delta-opioid receptor activity	4986	molecular function	0.7854	0.05092	37.9317	NaN	NaN	1	1	38	21092	0	0
delta-opioid receptor activity	4986	15464 acetylcholine receptor activity	0.27732	0.72568	2.78049	1.24479	0.35436	1	1	38	3	0	0
serotonin receptor activity	4993	molecular function	0.05268	0.75243	6.99768	0.84644	0.25124	1	1	7	21123	0	0
serotonin receptor activity	4993	15464 acetylcholine receptor activity	0.01875	1	2.1	0.27034	0.03333	1	1	7	3	0	0
ephrin receptor activity	5003	molecular function	0.81011	0.15547	16.9863	0.90603	0.29017	1	1	17	21113	0	0
ephrin receptor activity	5003	4714 transmembrane receptor protein tyrosine kinase activity	0.75152	0.21114	3.86364	0.22026	0.27271	1	1	17	5	0	0
transmembrane-ephrin receptor activity	5005	molecular function	0.51651	0.83415	1.99981	0.63464	0.69591	1	1	2	21128	0	0
transmembrane-ephrin receptor activity	5005	5003 ephrin receptor activity	0.30747	0.74464	1.77778	0.97614	0.64052	1	1	2	16	0	0
NGF/TNF (6 C-domain) receptor activity	5027	molecular function	0.05544	0.73655	1.99981	0.63464	0.22999	1	1	2	21128	0	0
NGF/TNF (6 C-domain) receptor activity	5027	8369 obsolete molecular function	0.03958	0.81723	1.97938	0.03005	0.15076	1	1	2	192	0	0
scavenger receptor activity	5044	molecular function	0.87964	0.37992	7.99697	0.85783	0.67982	1	0.19496	8	21122	13	1
scavenger receptor activity	5044	4888 transmembrane receptor activity	0.8179	0.38409	7.41284	0.87182	0.70138	1	0.00151	8	101	13	1
signal recognition particle binding	5047	molecular function	0.58152	0.76541	1.99981	0.63464	0.83258	1	1	2	21128	0	0
receptor signaling protein activity	5057	molecular function	0.41855	0.34341	9.99527	0.87463	0.66237	0.25033	1	10	21120	10	1
receptor signaling protein activity	5057	4871 signal transducer activity	0.43903	0.42896	9.73475	0.87903	0.71314	0.00425	1	10	367	10	1
SH3/SH2 adaptor activity	5070	molecular function	0.00794	0.93597	14.9893	0.89952	0.00237	1	1	15	21115	0	0
SH3/SH2 adaptor activity	5070	4871 signal transducer activity	0.0042	0.92518	14.4032	0.90508	0.00108	1	1	15	362	0	0
small GTPase regulator activity	5083	molecular function	0.00013	0.94791	11.9932	0.88661	0.00229	1	1	12	21118	0	0
small GTPase regulator activity	5083	30695 GTPase regulator activity	0.0014	1	4	0.69833	0.00323	1	1	12	6	0	0
guanyl-nucleotide exchange factor activity	5085	molecular function	0.00014	0.95599	9.99527	0.87463	0.00369	1	1	10	21120	0	0
guanyl-nucleotide exchange factor activity	5085	5083 small GTPase regulator activity	0.19953	0.83603	1.66667	0.822	0.48485	1	1	10	2	0	0
GTPase activator activity	5096	molecular function	0.00677	0.80145	13.9907	0.89572	0.09231	1	1	14	21116	0	0
GTPase activator activity	5096	8047 enzyme activator activity	0.13172	0.60244	2.47059	0.07465	0.43235	1	1	14	3	0	0
GTPase activator activity	5096	30695 GTPase regulator activity	0.15049	0.85676	3.11111	0.40575	0.27712	1	1	14	4	0	0
receptor binding	5102	molecular function	0.18707	0.2146	144.005	NaN	NaN	0.38901	0.90233	145	20985	5	7
receptor binding	5102	4871 signal transducer activity	0.53634	0.35455	89.2308	NaN	NaN	0	0.00069	145	232	5	7
receptor binding	5102	5515 protein binding	0.46053	0.12802	89.3783	0.99065	NaN	0	NaN	145	233	5	7
cytokine activity	5125	molecular function	0.04822	0.98658	32.9485	0.93364	0.05569	0.61378	1	33	21097	3	1
cytokine activity	5125	5102 receptor binding	0.00414	0.97012	25.4897	0.95822	0.00886	0.00623	1	33	112	3	1
cytokine activity	5125	5515 protein binding	0.02977	0.96975	30.1191	0.94226	0.04655	0.02012	1	33	345	3	1
hematopoietin/interferon-class (D200-domain) cytokine receptor binding	5126	molecular function	0.27439	0.61054	1.99981	0.63464	0.65918	1	1	2	21128	0	0
hematopoietin/interferon-class (D200-domain) cytokine receptor binding	5126	5125 cytokine activity	0.53716	0.4198	1.87879	0.41332	0.90988	1	1	2	31	0	0
hematopoietin/interferon-class (D200-domain) cytokine receptor binding	5126	5515 protein binding	0.26493	0.62511	1.98942	0.63591	0.6242	1	1	2	376	0	0
macrophage colony stimulating factor receptor binding	5157	molecular function	0.55603	0.1975	1.99981	0.63464	0.57359	1	1	2	21128	0	0
macrophage colony stimulating factor receptor binding	5157	5125 cytokine activity	0.8795	0.0519	1.87879	0.24047	0.1627	1	1	2	31	0	0
macrophage colony stimulating factor receptor binding	5157	8083 growth factor activity	0.4864	0.16868	1.8	0.18482	0.65924	1	1	2	18	0	0
transforming growth factor beta receptor binding	5160	molecular function	0.24141	0.66192	1.99981	0.63464	0.573	1	1	2	21128	0	0
transforming growth factor beta receptor binding	5160	5102 receptor binding	0.18031	0.75772	1.97241	0.63802	0.4158	1	1	2	143	0	0
transforming growth factor beta receptor binding	5160	8083 growth factor activity	0.16868	0.7903	1.8	0.3337	0.41283	1	1	2	18	0	0
tumor necrosis factor receptor binding	5164	molecular function	0.12765	0.8591	15.9879	0.90294	0.29937	1	1	16	21114	0	0
tumor necrosis factor receptor binding	5164	5125 cytokine activity	0.47218	0.26661	8.24242	0.23985	0.5522	1	1	16	17	0	0
tumor necrosis factor receptor binding	5164	8083 growth factor activity	0.3292	0.82121	8.88889	0.12072	0.47378	1	1	16	20	0	0
hormone activity	5179	molecular function	0.86422	0.31439	12.992	0.89145	0.28661	1	0.29703	13	21117	8	1
hormone activity	5179	5102 receptor binding	0.72541	0.20833	11.8345	0.90537	0.41017	1	0.00062	13	132	8	1
hormone activity	5179	8083 growth factor activity	0.86077	0.46813	7.87879	0.25582	0.53105	1	0.00062	13	20	8	1
cell adhesion molecule activity	5194	molecular function	0.7145	0.15379	43.9084	0.9428	0.15638	0.35575	0.11198	44	21086	11	5
cell adhesion molecule activity	5194	8369 obsolete molecular function	0.8145	0.34157	34.0206	0	0.31581	4e-05	NaN	44	150	11	5
cell adhesion molecule activity	5194	8083 growth factor activity	0.94036	0.43089	13.75	0.15286	0.51918	NaN	NaN	44	20	11	5
structural molecule activity	5198	molecular function	0.78573	0.07374	78.7046	0.95764	0.25305	0.65975	1	79	21051	3	2
structural molecule activity	5198	8369 obsolete molecular function	0.66772	0.32907	55.1794	0.06131	0.7769	0.00021	1	79	183	3	2
structural molecule activity	5198	8083 growth factor activity	0.89015	0.47409	15.9596	0.12087	0.72412	NaN	1	79	20	3	2
structural constituent of cytoskeleton	5200	molecular function	0.94027	0.37593	6.99768	0.84644	0.32645	1	1	7	21123	0	0
structural constituent of cytoskeleton	5200	5198 structural molecule activity	0.96503	0.55296	6.37975	0.45923	0.49559	1	1	7	72	0	0
structural constituent of cytoskeleton	5200	8083 growth factor activity	0.95177	0.59859	5.18519	0.18713	0.56128	1	1	7	20	0	0
extracellular matrix structural constituent	5201	molecular function	0.71681	0.34021	26.9655	0.92634	0.34143	1	1	27	21103	0	0
extracellular matrix structural constituent	5201	5198 structural molecule activity	0.37636	0.33507	17.7721	0.01955	0.79609	1	1	27	52	0	0
extracellular matrix structural constituent	5201	8083 growth factor activity	0.90531	0.48272	11.4894	0.00702	0.59809	1	1	27	20	0	0
transporter activity	5215	molecular function	0.31582	0.05575	284.075	NaN	NaN	0.82437	0.99961	288	20842	2	7
transporter activity	5215	8083 growth factor activity	0.79455	0.48696	16.9412	1.0835	0.68445	NaN	0.01363	288	18	2	7
ion channel activity	5216	molecular function	0.88586	0.04593	38.928	0.93913	0.12156	1	1	39	21091	0	0
ion channel activity	5216	15075 ion transporter activity	0.61895	0.15163	20.4512	0.07866	0.28348	1	1	39	43	0	0
ion channel activity	5216	15268 alpha-type channel activity	1	7e-05	7.3125	0.53043	0.00027	1	1	39	9	0	0
extracellular ligand-gated ion channel activity	5230	molecular function	0.62258	0.20449	4.99882	0.81206	0.39775	1	1	5	21125	0	0
extracellular ligand-gated ion channel activity	5230	5254 chloride channel activity	0.58918	0.58918	3.52941	0.24055	0.94053	1	1	5	12	0	0
excitatory extracellular ligand-gated ion channel activity	5231	molecular function	0.67877	0.37869	3.99924	0.78329	0.46311	1	1	4	21126	0	0
excitatory extracellular ligand-gated ion channel activity	5231	5254 chloride channel activity	0.63212	0.63212	3	0.4666	0.84176	1	1	4	12	0	0
gap-junction forming channel activity	5243	molecular function	3e-05	0.96006	8.99617	0.86701	0.00021	1	1	9	21121	0	0
gap-junction forming channel activity	5243	15268 alpha-type channel activity	0.0001	1	6.3871	0.64938	0.00118	1	1	9	22	0	0
gap-junction forming channel activity	5243	5261 cation channel activity	0.00027	1	6.3871	0.5228	0.00087	1	1	9	22	0	0
voltage-gated ion channel activity	5244	molecular function	0.91599	0.0479	27.9629	0.92773	0.10718	1	1	28	21102	0	0
voltage-gated ion channel activity	5244	5216 ion channel activity	0.76458	0.23704	7.89744	0.32733	0.40814	1	1	28	11	0	0
voltage-gated ion channel activity	5244	5261 cation channel activity	0.59119	0.39281	4.94118	0.09906	0.83887	1	1	28	6	0	0
voltage-gated calcium channel activity	5245	molecular function	0.29258	0.34108	4.99882	0.81206	0.9828	1	1	5	21125	0	0
voltage-gated calcium channel activity	5245	5244 voltage-gated ion channel activity	0.02761	0.51722	4.10714	0.05059	0.23006	1	1	5	23	0	0
voltage-gated chloride channel activity	5247	molecular function	0.95098	0.14163	11.9932	0.88661	0.24704	1	1	12	21118	0	0
voltage-gated chloride channel activity	5247	5244 voltage-gated ion channel activity	0.71973	0.58063	6.85714	0.63202	0.79839	1	1	12	16	0	0
voltage-gated sodium channel activity	5248	molecular function	0.61689	0.48066	1.99981	0.63464	0.84685	1	1	2	21128	0	0
voltage-gated sodium channel activity	5248	5244 voltage-gated ion channel activity	0.35295	0.70161	1.85714	0.74488	0.68799	1	1	2	26	0	0
voltage-gated potassium channel activity	5249	molecular function	0.426	0.05424	9.99527	0.87463	0.22037	1	1	10	21120	0	0
voltage-gated potassium channel activity	5249	5244 voltage-gated ion channel activity	0.26953	0.11046	6.42857	0.05021	0.54879	1	1	10	18	0	0
delayed rectifier potassium channel activity	5251	molecular function	0.94861	0.06628	1.99981	0.63464	0.12547	1	1	2	21128	0	0
delayed rectifier potassium channel activity	5251	5249 voltage-gated potassium channel activity	0.54373	0.33851	1.6	0.47415	0.84444	1	1	2	8	0	0
delayed rectifier potassium channel activity	5251	5267 potassium channel activity	0.61252	0.25625	1.63636	0.50261	0.65455	1	1	2	9	0	0
anion channel activity	5253	molecular function	0.95601	0.17611	13.9907	0.89572	0.28148	1	1	14	21116	0	0
anion channel activity	5253	5216 ion channel activity	0.88845	0.6012	8.97436	0.69915	0.78088	1	1	14	25	0	0
anion channel activity	5253	8509 anion transporter activity	0.68005	0.49372	7.46667	0.16868	0.75518	1	1	14	16	0	0
chloride channel activity	5254	molecular function	0.95098	0.14163	11.9932	0.88661	0.24704	1	1	12	21118	0	0
chloride channel activity	5254	5253 anion channel activity	0.75106	0.21044	1.71429	0.86198	0.52747	1	1	12	2	0	0
chloride channel activity	5254	8509 anion transporter activity	0.54241	0.36377	7.2	0.0829	0.53928	1	1	12	18	0	0
cation channel activity	5261	molecular function	0.86004	0.18604	21.9771	0.91801	0.19728	1	1	22	21108	0	0
cation channel activity	5261	5216 ion channel activity	0.80382	0.65389	9.58974	0.93536	0.89857	1	1	22	17	0	0
cation channel activity	5261	8324 cation transporter activity	0.74619	0.37774	12.6923	0.20435	0.31711	1	1	22	30	0	0
calcium channel activity	5262	molecular function	0.29258	0.34108	4.99882	0.81206	0.9828	1	1	5	21125	0	0
calcium channel activity	5262	5261 cation channel activity	0.07647	0.6018	3.86364	0.05852	0.27244	1	1	5	17	0	0
calcium channel activity	5262	8324 cation transporter activity	0.33337	0.52204	4.44444	0.13886	0.67781	1	1	5	40	0	0
potassium channel activity	5267	molecular function	0.5001	0.08699	10.9943	0.88107	0.34773	1	1	11	21119	0	0
potassium channel activity	5267	5261 cation channel activity	0.18845	0.0737	5.5	0.00054	0.64558	1	1	11	11	0	0
potassium channel activity	5267	8324 cation transporter activity	0.31639	0.06899	8.53061	0.00223	0.42897	1	1	11	38	0	0
sodium channel activity	5272	molecular function	0.50552	0.35539	2.99957	0.73579	0.93941	1	1	3	21127	0	0
sodium channel activity	5272	5261 cation channel activity	0.31784	0.63907	2.59091	0.25996	0.56572	1	1	3	19	0	0
sodium channel activity	5272	8324 cation transporter activity	0.56878	0.5157	2.8	0.3964	0.90941	1	1	3	42	0	0
amine transporter activity	5275	molecular function	0.60923	0.65998	1.99981	0.63464	0.96699	1	1	2	21128	0	0
amine transporter activity	5275	5215 transporter activity	0.54284	0.76432	1.98611	0.63632	0.78513	1	1	2	286	0	0
lipid transporter activity	5319	molecular function	0.50675	0.62538	1.99981	0.63464	0.89853	1	1	2	21128	0	0
lipid transporter activity	5319	5215 transporter activity	0.43115	0.7387	1.98611	0.63632	0.70142	1	1	2	286	0	0
neurotransmitter transporter activity	5326	molecular function	0.16969	0.65998	1.99981	0.63464	0.47559	1	1	2	21128	0	0
neurotransmitter transporter activity	5326	5215 transporter activity	0.11879	0.76432	1.98611	0.63632	0.32091	1	1	2	286	0	0
neurotransmitter\:sodium symporter activity	5328	molecular function	0.16969	0.65998	1.99981	0.63464	0.47559	1	1	2	21128	0	0
organic acid transporter activity	5342	molecular function	0.85981	0.46927	3.99924	0.78329	0.59133	1	1	4	21126	0	0
organic acid transporter activity	5342	5215 transporter activity	0.70715	0.60391	3.94444	0.7865	0.75783	1	1	4	284	0	0
sugar porter activity	5351	molecular function	0.8096	0.18513	6.99768	0.84644	0.36746	0.18264	0.17283	7	21123	29	2
sugar porter activity	5351	15291 porter activity	0.48371	0.3591	3.73333	0.00131	0.77887	NaN	NaN	7	8	29	2
carrier activity	5386	molecular function	0.76108	0.04389	78.7046	0.95764	0.05885	0.89772	0.88295	79	21051	3	2
carrier activity	5386	5215 transporter activity	0.99911	0.28263	57.3299	0.97728	0.16866	0.01856	NaN	79	209	3	2
sodium\:potassium-exchanging ATPase activity	5391	molecular function	0.45211	0.68836	1.99981	0.63464	0.78293	1	1	2	21128	0	0
sodium\:potassium-exchanging ATPase activity	5391	15662 ATPase activity\, coupled to transmembrane movement of ions\, phosphorylative mechanism	0.42074	0.42074	1.2	0.41334	1	1	1	2	3	0	0
sodium\:potassium-exchanging ATPase activity	5391	15662 ATPase activity\, coupled to transmembrane movement of ions\, phosphorylative mechanism	0.42074	0.42074	1.2	0.41334	1	1	1	2	3	0	0
monovalent cation\:proton antiporter activity	5451	molecular function	0.34349	0.05217	3.99924	0.78329	0.42606	1	1	4	21126	0	0
monovalent cation\:proton antiporter activity	5451	15078 hydrogen ion transporter activity	0.71312	0.0477	2.76923	0.0188	0.24056	1	1	4	9	0	0
binding	5488	molecular function	0.29277	0.01163	923.654	NaN	NaN	0.24388	0.96921	968	20162	5	47
electron transporter activity	5489	molecular function	0.64321	0.04715	57.8408	0.95037	0.1216	0.81233	1	58	21072	2	1
electron transporter activity	5489	5215 transporter activity	0.91395	0.24766	46.3194	0.96648	0.23928	0.01365	1	58	230	2	1
heavy metal binding	5505	molecular function	0.40922	0.40603	9.99527	0.87463	0.99125	1	1	10	21120	0	0
heavy metal binding	5505	8369 obsolete molecular function	0.26716	0.5817	9.48454	0.01506	0.7156	1	1	10	184	0	0
heavy metal binding	5505	19842 vitamin binding	0.64427	0.24065	2.85714	0.1235	0.71129	1	1	10	4	0	0
copper/cadmium binding	5508	molecular function	0.55742	0.76541	1.99981	0.63464	0.80923	1	1	2	21128	0	0
copper/cadmium binding	5508	8369 obsolete molecular function	0.50414	0.7906	1.97938	1.10926	0.72299	1	1	2	192	0	0
copper/cadmium binding	5508	19842 vitamin binding	0.39125	0.79089	1.33333	1.10231	0.8	1	1	2	4	0	0
calcium ion binding	5509	molecular function	0.68126	0.00845	96.5547	0.96187	0.02327	0.13928	0.73538	97	21033	7	7
calcium ion binding	5509	43169 cation binding	0.98283	0.0136	37.8239	0.00274	0.01625	NaN	NaN	97	62	7	7
calcium ion binding	5509	46872 metal ion binding	0.94726	0.00882	43.8418	0.08846	0.00525	NaN	NaN	97	80	7	7
protein binding	5515	molecular function	0.21601	0.63678	371.238	NaN	NaN	0.16987	0.99776	378	20752	4	17
protein binding	5515	5488 binding	0.07688	1	230.393	NaN	NaN	0	0.00179	378	590	4	17
protein binding	5515	46872 metal ion binding	0.13447	0.94607	96.7323	1.01882	0.09141	NaN	1e-05	378	130	4	17
calmodulin binding	5516	molecular function	0.98497	0.18383	5.9983	0.83182	0.13893	1	1	6	21124	0	0
calmodulin binding	5516	5515 protein binding	0.99912	0.1794	5.90476	0.83503	0.11804	1	1	6	372	0	0
calmodulin binding	5516	46872 metal ion binding	0.99147	0.18152	5.80328	0.3052	0.17769	1	1	6	177	0	0
collagen binding	5518	molecular function	0.15372	0.94563	8.99617	0.86701	0.16757	1	1	9	21121	0	0
collagen binding	5518	5515 protein binding	0.12454	0.92672	8.78571	0.87114	0.17232	1	1	9	369	0	0
collagen binding	5518	46872 metal ion binding	0.10415	0.93497	8.54237	0.15164	0.13735	1	1	9	168	0	0
cytoskeletal regulatory protein binding	5519	molecular function	0.74986	0.30635	1.99981	0.63464	0.54274	1	1	2	21128	0	0
cytoskeletal regulatory protein binding	5519	8092 cytoskeletal protein binding	0.74464	0.30747	1.77778	0.79619	0.64052	1	1	2	16	0	0
cytoskeletal regulatory protein binding	5519	46872 metal ion binding	0.74833	0.40658	1.97765	0.50916	0.66553	1	1	2	177	0	0
ATP binding	5524	molecular function	0.40377	0.111	174.534	NaN	NaN	0.22735	0.85141	176	20954	6	10
ATP binding	5524	46872 metal ion binding	0.80062	0.52763	86.9885	1.00047	0.76783	0	0	176	172	6	10
GTP binding	5525	molecular function	0.71051	0.01294	22.975	0.9199	0.23064	0.48465	0.00293	23	21107	22	5
GTP binding	5525	46872 metal ion binding	0.66211	0.00868	20.355	0.14539	0.27593	0.00868	NaN	23	177	22	5
sugar binding	5529	molecular function	0.41854	0.5866	18.9829	0.91142	0.96897	1	0.09022	19	21111	11	2
sugar binding	5529	30246 carbohydrate binding	0.32301	0.32301	5.62963	0.09721	0.85256	1	NaN	19	8	11	2
sugar binding	5529	46872 metal ion binding	0.3685	0.52969	17.1582	0.59563	0.79516	1	0	19	177	11	2
glycosaminoglycan binding	5539	molecular function	0.18341	0.34853	6.99768	0.84644	0.83916	1	1	7	21123	0	0
glycosaminoglycan binding	5539	30247 polysaccharide binding	1	0.04449	1.55556	0.97449	0.11111	1	1	7	2	0	0
glycosaminoglycan binding	5539	46872 metal ion binding	0.13096	0.43418	6.73077	0.19501	0.92132	1	1	7	175	0	0
hyaluronic acid binding	5540	molecular function	0.30288	0.78204	1.99981	0.63464	0.5386	1	1	2	21128	0	0
hyaluronic acid binding	5540	5539 glycosaminoglycan binding	0.37151	0.96117	1.42857	0.72931	0.57143	1	1	2	5	0	0
hyaluronic acid binding	5540	46872 metal ion binding	0.24136	0.75861	1.97765	0.53023	0.47546	1	1	2	177	0	0
folic acid binding	5542	molecular function	0.46132	0.54879	2.99957	0.73579	0.97108	1	1	3	21127	0	0
folic acid binding	5542	46872 metal ion binding	0.34389	0.48484	2.95	1.13825	0.99108	1	1	3	177	0	0
phospholipid binding	5543	molecular function	0.20088	0.5026	2.99957	0.73579	0.75796	1	1	3	21127	0	0
phospholipid binding	5543	8289 lipid binding	0.79109	0.05666	2.30769	0.0752	0.21678	1	1	3	10	0	0
phospholipid binding	5543	46872 metal ion binding	0.16066	0.58042	2.94944	0.06093	0.5644	1	1	3	175	0	0
calcium-dependent phospholipid binding	5544	molecular function	0.32091	0.28393	1.99981	0.63464	0.93542	1	1	2	21128	0	0
calcium-dependent phospholipid binding	5544	46872 metal ion binding	0.27203	0.3787	1.9774	0.06841	0.87319	1	1	2	175	0	0
molecular function unknown	5554	molecular function	0.96428	0.17482	50.8769	0.94699	0.15492	0.77028	0.74941	51	21079	4	2
molecular function unknown	5554	8369 obsolete molecular function	0.98972	0.44666	40.2521	0.07222	0.40989	0.01678	0.00722	51	191	4	2
molecular function unknown	5554	46872 metal ion binding	0.92172	0.27964	39.5418	0.00248	0.35559	0.01915	0.00722	51	176	4	2
blood group antigen	5555	molecular function	0.75335	0.05229	1.99981	0.63464	0.19908	1	1	2	21128	0	0
blood group antigen	5555	8369 obsolete molecular function	0.74396	0.05737	1.97938	0.03236	0.22185	1	1	2	192	0	0
blood group antigen	5555	46872 metal ion binding	0.76877	0.05228	1.97765	0.02834	0.20186	1	1	2	177	0	0
microtubule binding	8017	molecular function	0.32841	0.46445	1.99981	0.63464	0.86614	1	1	2	21128	0	0
G-protein coupled photoreceptor activity	8020	molecular function	0.191	0.9946	1.99981	0.63464	0.20362	1	1	2	21128	0	0
G-protein coupled photoreceptor activity	8020	1584 rhodopsin-like receptor activity	0.19054	0.99896	1.94521	0.64151	0.20505	1	1	2	71	0	0
monocarboxylic acid transporter activity	8028	molecular function	0.92039	0.35264	1.99981	0.63464	0.4233	1	1	2	21128	0	0
iron-sulfur electron transfer carrier	8042	molecular function	0.83877	0.50948	1.99981	0.63464	0.65269	1	1	2	21128	0	0
iron-sulfur electron transfer carrier	8042	8369 obsolete molecular function	0.83431	0.59446	1.97938	0.89249	0.75163	1	1	2	192	0	0
enzyme activator activity	8047	molecular function	0.03344	0.92811	16.9863	0.90603	0.10281	1	1	17	21113	0	0
enzyme activator activity	8047	30234 enzyme regulator activity	0.06639	0.90308	11.4423	0.28562	0.11628	1	1	17	35	0	0
chitin binding	8061	molecular function	0.097	0.94771	1.99981	0.63464	0.17399	1	1	2	21128	0	0
chitin binding	8061	30247 polysaccharide binding	0.04449	1	1.55556	0.97449	0.11111	1	1	2	7	0	0
chitin binding	8061	5096 GTPase activator activity	0.42509	0.55207	1.75	0.69102	0.93333	1	1	2	14	0	0
glutamate receptor activity	8066	molecular function	0.06482	0.70749	1.99981	0.63464	0.26558	1	1	2	21128	0	0
glutamate receptor activity	8066	4888 transmembrane receptor activity	0.04339	0.81804	1.9633	0.63918	0.17194	1	1	2	107	0	0
glutamate receptor activity	8066	5096 GTPase activator activity	0.42509	0.21853	1.75	0.03249	0.81667	1	1	2	14	0	0
Hsp70/Hsp90 organizing protein activity	8077	molecular function	0.72002	0.04531	3.99924	0.78329	0.17561	1	1	4	21126	0	0
Hsp70/Hsp90 organizing protein activity	8077	8369 obsolete molecular function	0.70316	0.06881	3.91753	0.05306	0.24389	1	1	4	190	0	0
phosphoric diester hydrolase activity	8081	molecular function	0.33214	0.75981	2.99957	0.73579	0.56258	1	1	3	21127	0	0
phosphoric diester hydrolase activity	8081	42578 phosphoric ester hydrolase activity	0.5102	0.95881	2.4	0.01724	0.63297	1	1	3	12	0	0
growth factor activity	8083	molecular function	0.74029	0.75188	19.9811	0.91379	0.92284	0.43808	0.4186	20	21110	10	2
growth factor activity	8083	5102 receptor binding	0.69129	0.80883	17.2414	0.9318	0.9087	0.00378	0.00095	20	125	10	2
cytoskeletal protein binding	8092	molecular function	0.43944	0.31052	17.9847	0.90884	0.92861	1	1	18	21112	0	0
cytoskeletal protein binding	8092	5515 protein binding	0.41766	0.36783	17.1429	0.91498	0.87529	1	1	18	360	0	0
DNA-dependent ATPase activity	8094	molecular function	0.35013	0.62986	1.99981	0.63464	0.73049	1	1	2	21128	0	0
ubiquinol-cytochrome-c reductase activity	8121	molecular function	0.13438	0.30647	2.99957	0.73579	0.73992	1	1	3	21127	0	0
ubiquinol-cytochrome-c reductase activity	8121	15078 hydrogen ion transporter activity	0.17034	0.32213	2.25	0.02058	0.81818	1	1	3	9	0	0
ubiquinol-cytochrome-c reductase activity	8121	15399 primary active transporter activity	0.42074	0.42074	1.2	0.01566	1	1	1	3	2	0	0
pancreatic elastase activity	8132	molecular function	0.14333	0.8583	1.99981	0.63464	0.29505	1	1	2	21128	0	0
pancreatic elastase activity	8132	4252 serine-type endopeptidase activity	0.11149	0.83603	1.66667	0.47602	0.36364	1	1	2	10	0	0
transcription factor binding	8134	molecular function	0.02407	0.95103	30.9545	0.93145	0.05465	0.59084	1	31	21099	3	1
transcription factor binding	8134	5515 protein binding	0.01289	0.91886	28.4577	0.93978	0.05675	0.01891	1	31	347	3	1
translation factor activity\, nucleic acid binding	8135	molecular function	0.50907	0.72865	4.99882	0.81206	0.99222	1	1	5	21125	0	0
translation factor activity\, nucleic acid binding	8135	3676 nucleic acid binding	0.46317	0.66559	4.93113	0.81503	0.87046	1	1	5	358	0	0
NADH dehydrogenase (ubiquinone) activity	8137	molecular function	0.73934	0.09511	31.9515	0.93257	0.13663	1	1	32	21098	0	0
NADH dehydrogenase (ubiquinone) activity	8137	15078 hydrogen ion transporter activity	0.66804	0.29519	7.02439	1.08379	0.45911	1	1	32	9	0	0
NADH dehydrogenase (ubiquinone) activity	8137	15399 primary active transporter activity	0.55759	0.61708	1.88235	0.5248	0.9708	1	1	32	2	0	0
protein tyrosine/serine/threonine phosphatase activity	8138	molecular function	0.71077	0.14874	5.9983	0.83182	0.33087	1	1	6	21124	0	0
protein tyrosine/serine/threonine phosphatase activity	8138	4721 phosphoprotein phosphatase activity	1	0.14121	3.23077	0.54488	0.13753	1	1	6	7	0	0
protein tyrosine/serine/threonine phosphatase activity	8138	15399 primary active transporter activity	0.63297	0.63297	1.5	0.53188	1	1	1	6	2	0	0
poly(A) binding	8143	molecular function	0.0378	0.92353	1.99981	0.63464	0.10834	1	1	2	21128	0	0
poly(A) binding	8143	15399 primary active transporter activity	0.04852	1	1	0.39847	0.33333	1	1	2	2	0	0
positive transcription elongation factor activity	8159	molecular function	0.57211	0.31314	1.99981	0.63464	0.70863	1	1	2	21128	0	0
positive transcription elongation factor activity	8159	3711 transcriptional elongation regulator activity	0.46933	0.46933	1	0.24847	1	1	1	2	2	0	0
positive transcription elongation factor activity	8159	3729 mRNA binding	1	0.04852	1	0.89852	0.33333	1	1	2	2	0	0
positive transcription elongation factor activity	8159	15399 primary active transporter activity	0.46933	0.46933	1	0.46212	1	1	1	2	2	0	0
methyltransferase activity	8168	molecular function	0.76948	0.00878	72.7478	NaN	NaN	1	1	73	21057	0	0
methyltransferase activity	8168	3729 mRNA binding	0.99122	0.01806	1.94667	1.35868	0.05037	1	1	73	2	0	0
methyltransferase activity	8168	15399 primary active transporter activity	0.59545	0.64908	1.94667	1.35868	0.93447	1	1	73	2	0	0
N-methyltransferase activity	8170	molecular function	0.98203	0.04426	1.99981	0.63464	0.07841	1	1	2	21128	0	0
N-methyltransferase activity	8170	8168 methyltransferase activity	0.99586	0.05444	1.94521	0.64151	0.07885	1	1	2	71	0	0
N-methyltransferase activity	8170	3729 mRNA binding	1	0.04852	1	0.49954	0.33333	1	1	2	2	0	0
N-methyltransferase activity	8170	15399 primary active transporter activity	1	0.46933	1	0.84503	0.66667	1	1	2	2	0	0
RNA methyltransferase activity	8173	molecular function	0.97472	0.01224	2.99957	0.73579	0.0344	1	1	3	21127	0	0
RNA methyltransferase activity	8173	8168 methyltransferase activity	0.99408	0.01541	2.87671	0.7463	0.03237	1	1	3	70	0	0
RNA methyltransferase activity	8173	3729 mRNA binding	1	0.03134	1.2	0.73359	0.2	1	1	3	2	0	0
RNA methyltransferase activity	8173	15399 primary active transporter activity	1	0.21457	1.2	0.45402	0.4	1	1	3	2	0	0
tRNA methyltransferase activity	8175	molecular function	0.98203	0.04426	1.99981	0.63464	0.07841	1	1	2	21128	0	0
tRNA methyltransferase activity	8175	8757 S-adenosylmethionine-dependent methyltransferase activity	0.99586	0.05444	1.94521	0.64151	0.07885	1	1	2	71	0	0
tRNA methyltransferase activity	8175	15399 primary active transporter activity	1	0.46933	1	0.84503	0.66667	1	1	2	2	0	0
tumor suppressor	8181	molecular function	0.50665	0.18684	3.99924	0.78329	0.57136	1	1	4	21126	0	0
tumor suppressor	8181	8369 obsolete molecular function	0.49877	0.22191	3.91753	0.18356	0.69547	1	1	4	190	0	0
tumor suppressor	8181	8757 S-adenosylmethionine-dependent methyltransferase activity	0.37832	0.39447	3.78667	0.79621	0.99059	1	1	4	71	0	0
tumor suppressor	8181	15399 primary active transporter activity	0.39125	0.79089	1.33333	0.45934	0.8	1	1	4	2	0	0
apoptosis inhibitor activity	8189	molecular function	0.09494	0.90859	3.99924	0.78329	0.1961	1	1	4	21126	0	0
apoptosis inhibitor activity	8189	8369 obsolete molecular function	0.06881	0.95083	3.91753	0.17668	0.12277	1	1	4	190	0	0
apoptosis inhibitor activity	8189	30594 neurotransmitter receptor activity	0.00553	1	2	0.29456	0.02857	1	1	4	4	0	0
UDP-glycosyltransferase activity	8194	molecular function	0.87983	0.04909	1.99981	0.63464	0.1363	1	1	2	21128	0	0
UDP-glycosyltransferase activity	8194	16757 transferase activity\, transferring glycosyl groups	0.89196	0.05737	1.5	0.39615	0.28571	1	1	2	6	0	0
UDP-glycosyltransferase activity	8194	30594 neurotransmitter receptor activity	1	0.39125	1.33333	0.89811	0.53333	1	1	2	4	0	0
ion channel inhibitor activity	8200	molecular function	0.23172	0.08173	86.6418	NaN	NaN	0.4484	1	87	21043	3	3
ion channel inhibitor activity	8200	30594 neurotransmitter receptor activity	0.1401	0.86189	3.82418	1.20617	0.21176	NaN	1	87	4	3	3
heparin binding	8201	molecular function	0.42789	0.15493	4.99882	0.81206	0.52927	1	1	5	21125	0	0
heparin binding	8201	5539 glycosaminoglycan binding	0.96117	0.37151	1.42857	0.72931	0.57143	1	1	5	2	0	0
heparin binding	8201	30594 neurotransmitter receptor activity	0.02646	0.79692	2.22222	0.06559	0.19048	1	1	5	4	0	0
peptidase activity	8233	molecular function	0.08368	0.56542	51.872	0.94751	0.35421	0.43596	1	52	21078	4	2
peptidase activity	8233	16787 hydrolase activity	0.08836	0.5882	35.5122	0.06134	0.30296	1e-05	1	52	112	4	2
peptidase activity	8233	30594 neurotransmitter receptor activity	0.01809	0.92138	3.71429	0.0606	0.04676	NaN	1	52	4	4	2
cysteine-type peptidase activity	8234	molecular function	0.2969	0.63116	24.9704	0.92332	0.79274	0.51353	1	25	21105	4	1
cysteine-type peptidase activity	8234	8233 peptidase activity	0.24414	0.02443	12.9808	0.27768	0.71413	0.00118	1	25	27	4	1
cysteine-type peptidase activity	8234	30594 neurotransmitter receptor activity	0.05053	0.80874	3.44828	0.04499	0.17385	NaN	1	25	4	4	1
metalloexopeptidase activity	8235	molecular function	0.0803	0.62183	1.99981	NaN	0.34948	1	1	2	21128	0	0
metalloexopeptidase activity	8235	8237 metallopeptidase activity	0.11516	0.70763	1.55556	0	0.5	1	1	2	7	0	0
serine-type peptidase activity	8236	molecular function	0.12568	0.90736	11.9932	0.88661	0.38654	0.29233	1	12	21118	8	1
serine-type peptidase activity	8236	8233 peptidase activity	0.47249	0.81539	9.23077	0.0978	0.73638	0.00057	1	12	40	8	1
metallopeptidase activity	8237	molecular function	0.21971	0.68775	6.99768	0.84644	0.52016	1	1	7	21123	0	0
metallopeptidase activity	8237	8233 peptidase activity	0.43865	0.70647	6.05769	0.04274	0.66794	1	1	7	45	0	0
pre-mRNA splicing factor activity	8248	molecular function	0.45448	0.6522	3.99924	0.78329	0.62314	1	1	4	21126	0	0
pre-mRNA splicing factor activity	8248	8369 obsolete molecular function	0.39609	0.69645	3.91753	1.03636	0.53171	1	1	4	190	0	0
nucleotidase activity	8252	molecular function	0.00732	0.97357	5.9983	0.83182	0.01071	1	1	6	21124	0	0
nucleotidase activity	8252	16791 phosphoric monoester hydrolase activity	0.03929	0.96083	4.36364	0.16491	0.02695	1	1	6	16	0	0
5'-nucleotidase activity	8253	molecular function	0.00732	0.97357	5.9983	0.83182	0.01071	1	1	6	21124	0	0
zinc ion binding	8270	molecular function	0.08516	0.75359	52.8671	0.94802	0.57596	0.44561	1	53	21077	4	2
zinc ion binding	8270	46914 transition metal ion binding	0.91151	0.05976	7.69355	0.12575	0.1446	NaN	1	53	9	4	2
sulfate porter activity	8271	molecular function	0.83674	0.26903	14.9893	0.89952	0.50847	1	1	15	21115	0	0
sulfate porter activity	8271	15291 porter activity	0.51057	0.51057	7.5	0	0.93389	1	1	15	15	0	0
lipid binding	8289	molecular function	0.01967	0.94391	12.992	0.89145	0.01976	1	1	13	21117	0	0
lipid binding	8289	5488 binding	0.01193	0.93642	12.8254	0.89337	0.01087	1	1	13	955	0	0
lipid binding	8289	15291 porter activity	0.03044	0.93265	6.96429	0.00494	0.05893	1	1	13	15	0	0
structural constituent of muscle	8307	molecular function	0.40149	0.94782	2.99957	0.73579	0.41313	0.08279	1	3	21127	33	1
structural constituent of muscle	8307	5198 structural molecule activity	0.38169	1	2.88608	0.00011	0.28711	0.00014	1	3	76	33	1
voltage-gated ion-selective channel activity	8308	molecular function	0.56708	0.57267	1.99981	0.63464	0.98895	1	1	2	21128	0	0
voltage-gated ion-selective channel activity	8308	5253 anion channel activity	0.21044	0.75106	1.71429	0.86198	0.52747	1	1	2	12	0	0
protein prenyltransferase activity	8318	molecular function	0.07547	0.69918	4.99882	0.81206	0.39853	1	0.12675	5	21125	20	1
protein prenyltransferase activity	8318	4659 prenyltransferase activity	0.00681	0.73213	3.21429	0	0.07692	1	NaN	5	9	20	1
cation transporter activity	8324	molecular function	0.40941	0.32909	44.9042	0.94346	0.51344	1	1	45	21085	0	0
cation transporter activity	8324	15075 ion transporter activity	0.20631	0.9786	19.3671	0.89984	0.33182	1	1	45	34	0	0
cation transporter activity	8324	5515 protein binding	0.73796	0.36731	40.1555	0.95268	0.43896	1	1	45	373	0	0
cation transporter activity	8324	8565 protein transporter activity	0.21806	0.94737	8.83929	0.30593	0.24386	1	1	45	11	0	0
obsolete molecular function	8369	molecular function	0.86558	0.24294	192.219	0.9733	0.2279	0.30504	0.76183	194	20936	6	11
obsolete molecular function	8369	43565 sequence-specific DNA binding	0.35868	0.99827	4.87437	1.18244	NaN	NaN	NaN	194	5	6	11
obsolete molecular function	8369	8565 protein transporter activity	0.42818	0.78927	9.5098	0.16021	0.60369	NaN	NaN	194	10	6	11
O-acyltransferase activity	8374	molecular function	0.64767	0.39908	18.9829	0.91142	0.52402	1	1	19	21111	0	0
O-acyltransferase activity	8374	43565 sequence-specific DNA binding	0.41579	0.95147	3.95833	1.13367	NaN	1	1	19	5	0	0
O-acyltransferase activity	8374	8565 protein transporter activity	0.69293	0.84221	8.06061	0.99973	0.84121	1	1	19	14	0	0
galactosyltransferase activity	8378	molecular function	0.68423	0.54427	1.99981	0.63464	0.84477	1	1	2	21128	0	0
galactosyltransferase activity	8378	16758 transferase activity\, transferring hexosyl groups	0.46933	0.46933	1	0.38209	1	1	1	2	2	0	0
galactosyltransferase activity	8378	16758 transferase activity\, transferring hexosyl groups	0.46933	0.46933	1	0.38209	1	1	1	2	2	0	0
galactosyltransferase activity	8378	8565 protein transporter activity	0.55207	0.55207	1.75	0.51982	1	1	1	2	14	0	0
fatty acid (omega-1)-hydroxylase activity	8393	molecular function	0.93765	0.0466	1.99981	0.63464	0.10596	1	1	2	21128	0	0
fatty acid (omega-1)-hydroxylase activity	8393	4497 monooxygenase activity	1	0.00852	1.80952	0.66113	0.02661	1	1	2	19	0	0
fatty acid (omega-1)-hydroxylase activity	8393	16705 oxidoreductase activity\, acting on paired donors\, with incorporation or reduction of molecular oxygen	0.99087	0.01751	1.84615	0.65543	0.04854	1	1	2	24	0	0
fatty acid (omega-1)-hydroxylase activity	8393	8565 protein transporter activity	0.90933	0.0564	1.75	0.5423	0.2	1	1	2	14	0	0
3'-5' exonuclease activity	8408	molecular function	0.16194	0.6908	5.9983	0.83182	0.55693	1	1	6	21124	0	0
3'-5' exonuclease activity	8408	16705 oxidoreductase activity\, acting on paired donors\, with incorporation or reduction of molecular oxygen	0.52366	0.25931	4.875	0.87614	0.57864	1	1	6	26	0	0
3'-5' exonuclease activity	8408	8565 protein transporter activity	0.16277	0.91425	4.2	0.33629	0.34233	1	1	6	14	0	0
CoA-transferase activity	8410	molecular function	0.15894	0.96958	6.99768	0.84644	0.18823	1	1	7	21123	0	0
CoA-transferase activity	8410	16705 oxidoreductase activity\, acting on paired donors\, with incorporation or reduction of molecular oxygen	0.48519	0.72511	5.51515	0.89432	0.7747	1	1	7	26	0	0
CoA-transferase activity	8410	8565 protein transporter activity	0.13584	1	4.66667	0.8939	0.12617	1	1	7	14	0	0
acyltransferase activity	8415	molecular function	0.63357	0.50405	19.9811	0.91379	0.51865	1	1	20	21110	0	0
acyltransferase activity	8415	16705 oxidoreductase activity\, acting on paired donors\, with incorporation or reduction of molecular oxygen	0.96185	0.27639	11.3043	0.98429	0.1436	1	1	20	26	0	0
acyltransferase activity	8415	8565 protein transporter activity	0.68781	0.81017	8.23529	0.91404	0.82007	1	1	20	14	0	0
selenium binding	8430	molecular function	0.39195	0.72087	3.99924	0.78329	0.55916	1	1	4	21126	0	0
selenium binding	8430	5488 binding	0.36321	0.75994	3.98347	0.78421	0.47292	1	1	4	964	0	0
selenium binding	8430	16705 oxidoreductase activity\, acting on paired donors\, with incorporation or reduction of molecular oxygen	0.62025	0.52199	3.46667	0.8183	0.87876	1	1	4	26	0	0
selenium binding	8430	8565 protein transporter activity	0.24873	0.85676	3.11111	0.59076	0.36732	1	1	4	14	0	0
phosphofructokinase activity	8443	molecular function	0.28755	0.33181	1.99981	0.63464	0.96121	0.05599	1	2	21128	50	1
phosphofructokinase activity	8443	16773 phosphotransferase activity\, alcohol group as acceptor	0.30737	0.38891	1.93443	0.01523	0.91935	0.00019	1	2	59	50	1
phosphofructokinase activity	8443	8565 protein transporter activity	0.31212	0.42509	1.75	0.00044	0.93333	NaN	1	2	14	50	1
RNA ligase activity	8452	molecular function	0.52813	0.14912	37.9317	0.93831	0.35328	0.66567	1	38	21092	3	1
RNA ligase activity	8452	8565 protein transporter activity	0.64724	0.81987	10.2308	0.61894	0.80447	NaN	1	38	14	3	1
procollagen-lysine 5-dioxygenase activity	8475	molecular function	0.32758	0.31124	1.99981	0.63464	0.96246	1	0.05276	2	21128	50	1
procollagen-lysine 5-dioxygenase activity	8475	16706 oxidoreductase activity\, acting on paired donors\, with incorporation or reduction of molecular oxygen\, 2-oxoglutarate as one donor\, and incorporation of one atom each of oxygen into both donors	0.70014	0.37151	1.42857	0.16394	0.85714	1	NaN	2	5	50	1
procollagen-lysine 5-dioxygenase activity	8475	19239 deaminase activity	0.42074	0.42074	1.2	0.02736	1	1	NaN	2	3	50	1
procollagen-lysine 5-dioxygenase activity	8475	8565 protein transporter activity	0.31212	0.31212	1.75	0.00376	1	1	NaN	2	14	50	1
anion transporter activity	8509	molecular function	0.91321	0.09891	28.9602	0.92904	0.12007	1	1	29	21101	0	0
anion transporter activity	8509	15075 ion transporter activity	0.93923	0.29648	18.2179	0.51043	0.30113	1	1	29	49	0	0
anion transporter activity	8509	8565 protein transporter activity	0.78282	0.359	9.44186	0.25252	0.8662	1	1	29	14	0	0
folic acid transporter activity	8517	molecular function	0.46132	0.54879	2.99957	0.73579	0.97108	1	1	3	21127	0	0
reduced folate carrier activity	8518	molecular function	0.46132	0.54879	2.99957	0.73579	0.97108	1	1	3	21127	0	0
reduced folate carrier activity	8518	15291 porter activity	0.34942	0.68486	2.4	0.33189	0.83956	1	1	3	12	0	0
ammonium transporter activity	8519	molecular function	0.67035	0.27371	2.99957	0.73579	0.57713	1	1	3	21127	0	0
ammonium transporter activity	8519	51184 cofactor transporter activity	0.63297	0.63297	1.5	0.40834	1	1	1	3	3	0	0
protein transporter activity	8565	molecular function	0.9471	0.35594	13.9907	0.89572	0.42654	1	1	14	21116	0	0
protein transporter activity	8565	5215 transporter activity	0.72196	0.60529	13.3194	0.90279	0.62514	1	1	14	274	0	0
small protein conjugating enzyme activity	8639	molecular function	0.13873	0.63865	7.99697	0.85783	0.42631	1	0.19496	8	21122	13	1
small protein conjugating enzyme activity	8639	3824 catalytic activity	0.09768	0.75713	7.89593	0.86015	0.28078	1	0.00378	8	607	13	1
N-acetylmuramoyl-L-alanine amidase activity	8745	molecular function	0.52714	0.29092	1.99981	0.63464	0.72474	1	0.05276	2	21128	50	1
S-adenosylmethionine-dependent methyltransferase activity	8757	molecular function	0.77876	0.0171	70.7614	NaN	NaN	1	1	71	21059	0	0
S-adenosylmethionine-dependent methyltransferase activity	8757	8168 methyltransferase activity	0.05444	0.99586	1.94521	1.35849	0.07885	1	1	71	2	0	0
agmatinase activity	8783	molecular function	0.02159	0.99211	7.99697	0.85783	0.05135	0.20586	1	8	21122	13	1
agmatinase activity	8783	16813 hydrolase activity\, acting on carbon-nitrogen (but not peptide) bonds\, in linear amidines	0.02404	1	2.66667	0.29271	0.07273	NaN	1	8	4	13	1
ferredoxin hydrogenase activity	8901	molecular function	0.36784	0.20997	2.99957	0.73579	0.68128	1	1	3	21127	0	0
ferredoxin hydrogenase activity	8901	15662 ATPase activity\, coupled to transmembrane movement of ions\, phosphorylative mechanism	0.45457	0.16967	1.875	0.11047	0.78571	1	1	3	5	0	0
electron carrier activity	9055	molecular function	0.77925	0.04654	29.9574	0.93028	0.06933	1	1	30	21100	0	0
electron carrier activity	9055	5386 carrier activity	0.86151	0.25116	18.6076	1e-05	0.31241	1	1	30	49	0	0
electron carrier activity	9055	5489 electron transporter activity	0.95562	0.24551	14.4828	0.0147	0.27603	1	1	30	28	0	0
electron carrier activity	9055	16773 phosphotransferase activity\, alcohol group as acceptor	0.63873	0.11849	19.8876	1e-05	0.25736	1	1	30	59	0	0
disulfide oxidoreductase activity	15036	molecular function	0.59182	0.60731	3.99924	0.78329	0.99405	0.10884	1	4	21126	25	1
disulfide oxidoreductase activity	15036	16491 oxidoreductase activity	0.61437	0.66408	3.85321	0.79203	0.99357	0.00057	1	4	105	25	1
disulfide oxidoreductase activity	15036	16758 transferase activity\, transferring hexosyl groups	0.72266	0.72266	2	0.07056	0.88571	NaN	1	4	4	25	1
disulfide oxidoreductase activity	15036	16773 phosphotransferase activity\, alcohol group as acceptor	0.6159	0.59419	3.74603	0.27612	0.96627	0.00038	1	4	59	25	1
toxin activity	15070	molecular function	0.6747	0.05262	4.99882	0.81206	0.2086	0.13415	0.12675	5	21125	40	2
toxin activity	15070	8369 obsolete molecular function	0.68176	0.06795	4.87113	0.01219	0.23872	0.00142	0.00071	5	189	40	2
toxin activity	15070	16773 phosphotransferase activity\, alcohol group as acceptor	0.69758	0.07189	4.60938	0.17963	0.30504	0.00047	0.00071	5	59	40	2
ion transporter activity	15075	molecular function	0.51445	0.06003	77.7121	0.95736	0.16788	1	1	78	21052	0	0
ion transporter activity	15075	5215 transporter activity	0.80041	0.33101	56.875	0.97683	0.50266	1	1	78	210	0	0
ion transporter activity	15075	16773 phosphotransferase activity\, alcohol group as acceptor	0.43248	0.31048	33.5912	0	0.68123	1	1	78	59	0	0
monovalent inorganic cation transporter activity	15077	molecular function	0.68235	0.75163	10.9943	0.88107	0.96281	1	1	11	21119	0	0
monovalent inorganic cation transporter activity	15077	8324 cation transporter activity	0.41101	0.64093	8.31111	0.84094	0.62503	1	1	11	34	0	0
monovalent inorganic cation transporter activity	15077	16773 phosphotransferase activity\, alcohol group as acceptor	0.56694	0.80902	9.27143	0.01338	0.7105	1	1	11	59	0	0
hydrogen ion transporter activity	15078	molecular function	0.63155	0.54179	8.99617	0.86701	0.93757	1	1	9	21121	0	0
hydrogen ion transporter activity	15078	15077 monovalent inorganic cation transporter activity	0.71148	0.33191	1.63636	0.22564	0.65455	1	1	9	2	0	0
hydrogen ion transporter activity	15078	16773 phosphotransferase activity\, alcohol group as acceptor	0.6125	0.66628	7.80882	0.018	0.79998	1	1	9	59	0	0
organic cation transporter activity	15101	molecular function	0.67035	0.27371	2.99957	0.73579	0.57713	1	1	3	21127	0	0
organic cation transporter activity	15101	8324 cation transporter activity	0.8253	0.17763	2.8	1.08721	0.53892	1	1	3	42	0	0
organic cation transporter activity	15101	16773 phosphotransferase activity\, alcohol group as acceptor	0.63486	0.36524	2.85484	0.31316	0.7678	1	1	3	59	0	0
inorganic anion transporter activity	15103	molecular function	0.77193	0.20693	15.9879	0.90294	0.40326	1	1	16	21114	0	0
inorganic anion transporter activity	15103	8509 anion transporter activity	0.35107	0.87413	7.17241	0.19156	0.52481	1	1	16	13	0	0
inorganic anion transporter activity	15103	16773 phosphotransferase activity\, alcohol group as acceptor	0.68502	0.21721	12.5867	7e-05	0.61854	1	1	16	59	0	0
carbohydrate transporter activity	15144	molecular function	0.8096	0.18513	6.99768	0.84644	0.36746	0.18264	0.17283	7	21123	29	2
carbohydrate transporter activity	15144	5215 transporter activity	0.77518	0.14016	6.82986	0.85113	0.37521	0.00166	NaN	7	281	29	2
carbohydrate transporter activity	15144	16773 phosphotransferase activity\, alcohol group as acceptor	0.82536	0.31969	6.25758	8e-05	0.53899	0.00066	0.00099	7	59	29	2
amino acid transporter activity	15171	molecular function	0.60923	0.65998	1.99981	0.63464	0.96699	1	1	2	21128	0	0
amino acid transporter activity	15171	46943 carboxylic acid transporter activity	0.46933	1	1	0.55284	0.66667	1	1	2	2	0	0
amino acid transporter activity	15171	16773 phosphotransferase activity\, alcohol group as acceptor	0.59196	0.72124	1.93443	0.60226	0.88727	1	1	2	59	0	0
thiamin transporter activity	15234	molecular function	0.46132	0.54879	2.99957	0.73579	0.97108	1	1	3	21127	0	0
thiamin transporter activity	15234	16773 phosphotransferase activity\, alcohol group as acceptor	0.39891	0.60919	2.85484	0.96444	0.86971	1	1	3	59	0	0
channel or pore class transporter activity	15267	molecular function	0.11495	0.87145	31.9515	0.93257	0.16239	1	1	32	21098	0	0
channel or pore class transporter activity	15267	5215 transporter activity	0.03768	0.91199	28.4444	0.9439	0.04757	1	1	32	256	0	0
channel or pore class transporter activity	15267	16773 phosphotransferase activity\, alcohol group as acceptor	0.15487	0.81629	20.7473	0.0082	0.18492	1	1	32	59	0	0
alpha-type channel activity	15268	molecular function	0.10123	0.87511	30.9545	0.93145	0.22634	1	1	31	21099	0	0
alpha-type channel activity	15268	16773 phosphotransferase activity\, alcohol group as acceptor	0.21432	0.81957	20.3222	0.01107	0.24128	1	1	31	59	0	0
dihydropyridine-sensitive calcium channel activity	15270	molecular function	0.5415	0.34608	1.99981	0.63464	0.77546	1	1	2	21128	0	0
dihydropyridine-sensitive calcium channel activity	15270	5245 voltage-gated calcium channel activity	0.6806	0.21457	1.2	0.92946	0.8	1	1	2	3	0	0
dihydropyridine-sensitive calcium channel activity	15270	15268 alpha-type channel activity	0.62266	0.31779	1.87097	0.45276	0.71745	1	1	2	29	0	0
dihydropyridine-sensitive calcium channel activity	15270	16773 phosphotransferase activity\, alcohol group as acceptor	0.55937	0.34688	1.93443	0.30426	0.79235	1	1	2	59	0	0
connexon channel activity	15285	molecular function	3e-05	0.96006	8.99617	0.86701	0.00021	1	1	9	21121	0	0
electrochemical potential-driven transporter activity	15290	molecular function	0.91973	0.45191	14.9893	0.89952	0.40266	0.35095	0.33415	15	21115	13	2
electrochemical potential-driven transporter activity	15290	5386 carrier activity	0.40261	0.34697	12.1519	0	0.8857	NaN	NaN	15	64	13	2
porter activity	15291	molecular function	0.91973	0.45191	14.9893	0.89952	0.40266	0.35095	0.33415	15	21115	13	2
symporter activity	15293	molecular function	0.67531	0.39641	4.99882	0.81206	0.72281	1	1	5	21125	0	0
symporter activity	15293	15291 porter activity	0.48465	0.48465	3.33333	0.01796	0.95305	1	1	5	10	0	0
sodium\:hydrogen antiporter activity	15385	molecular function	0.34349	0.05217	3.99924	0.78329	0.42606	1	1	4	21126	0	0
primary active transporter activity	15399	molecular function	0.86689	0.53403	1.99981	0.63464	0.64323	1	1	2	21128	0	0
primary active transporter activity	15399	5386 carrier activity	0.67255	0.54737	1.94937	0.90223	0.88831	1	1	2	77	0	0
primary active transporter activity	15399	15291 porter activity	0.71644	0.59391	1.76471	0.4507	0.94118	1	1	2	15	0	0
P-P-bond-hydrolysis-driven transporter activity	15405	molecular function	0.86689	0.53403	1.99981	0.63464	0.64323	1	1	2	21128	0	0
P-P-bond-hydrolysis-driven transporter activity	15405	15291 porter activity	0.71644	0.59391	1.76471	0.4507	0.94118	1	1	2	15	0	0
protein translocase activity	15450	molecular function	0.86689	0.53403	1.99981	0.63464	0.64323	1	1	2	21128	0	0
protein translocase activity	15450	8565 protein transporter activity	0.88053	0.60114	1.71429	1.19596	0.79121	1	1	2	12	0	0
auxiliary transport protein activity	15457	molecular function	0.30789	0.06288	87.6335	NaN	NaN	0.4558	1	88	21042	3	3
auxiliary transport protein activity	15457	5215 transporter activity	0.46988	0.28353	61.1111	0.98105	NaN	0	1	88	200	3	3
auxiliary transport protein activity	15457	15405 P-P-bond-hydrolysis-driven transporter activity	0.44842	0.73236	1.95556	1.35983	0.72195	NaN	1	88	2	3	3
auxiliary transport protein activity	15457	15405 P-P-bond-hydrolysis-driven transporter activity	0.44842	0.73236	1.95556	1.35983	0.72195	NaN	1	88	2	3	3
acetylcholine receptor activity	15464	molecular function	0.74042	0.09186	2.99957	0.73579	0.19821	1	1	3	21127	0	0
acetylcholine receptor activity	15464	4888 transmembrane receptor activity	0.79098	0.07593	2.91743	0.74271	0.1565	1	1	3	106	0	0
tubulin binding	15631	molecular function	0.11315	0.70675	2.99957	0.73579	0.37944	1	1	3	21127	0	0
tubulin binding	15631	8092 cytoskeletal protein binding	0.0616	0.4982	2.5	0.00378	0.42647	1	1	3	15	0	0
ATPase activity\, coupled to transmembrane movement of ions\, phosphorylative mechanism	15662	molecular function	0.12223	0.87183	4.99882	0.81206	0.34834	1	1	5	21125	0	0
ATPase activity\, coupled to transmembrane movement of ions\, phosphorylative mechanism	15662	8324 cation transporter activity	0.04302	0.97433	4.44444	0.62289	0.21263	1	1	5	40	0	0
ATPase activity\, coupled to transmembrane movement of ions\, phosphorylative mechanism	15662	15405 P-P-bond-hydrolysis-driven transporter activity	0.2403	1	1.42857	0.73781	0.38095	1	1	5	2	0	0
antioxidant activity	16209	molecular function	0.45488	0.14047	4.99882	0.81206	0.46247	1	1	5	21125	0	0
antioxidant activity	16209	30554 adenyl nucleotide binding	0.4089	0.20729	4.86188	0.81813	0.66831	1	1	5	176	0	0
steroid dehydrogenase activity	16229	molecular function	0.95225	0.19723	2.99957	0.73579	0.21626	1	1	3	21127	0	0
steroid dehydrogenase activity	16229	16616 oxidoreductase activity\, acting on the CH-OH group of donors\, NAD or NADP as acceptor	0.60114	0.13059	1.71429	0.25907	0.62857	1	1	3	4	0	0
channel regulator activity	16247	molecular function	0.30789	0.06288	87.6335	NaN	NaN	0.4558	1	88	21042	3	3
channel inhibitor activity	16248	molecular function	0.23172	0.08173	86.6418	NaN	NaN	0.4484	1	87	21043	3	3
general RNA polymerase II transcription factor activity	16251	molecular function	0.83446	0.05616	4.99882	0.81206	0.21871	1	1	5	21125	0	0
general RNA polymerase II transcription factor activity	16251	3702 RNA polymerase II transcription factor activity	0.79658	0.17615	4.5614	0.01481	0.43787	1	1	5	52	0	0
lipase activity	16298	molecular function	0.90534	0.07878	7.99697	0.85783	0.08883	1	1	8	21122	0	0
kinase activity	16301	molecular function	0.3268	0.64959	76.7194	0.95708	0.91159	0.37245	0.33748	77	21053	8	6
kinase activity	16301	16772 transferase activity\, transferring phosphorus-containing groups	0.68859	0.34732	5.56627	0.18328	0.65385	NaN	NaN	77	6	8	6
apoptosis regulator activity	16329	molecular function	0.02314	0.93386	28.9602	0.92904	0.12368	0.19816	1	29	21101	7	2
apoptosis regulator activity	16329	8369 obsolete molecular function	0.00443	0.99236	24.665	0.58048	0.02409	2e-05	1	29	165	7	2
pyrophosphatase activity	16462	molecular function	0.86468	0.00454	15.9879	0.90294	0.07963	1	0.0007	16	21114	25	4
oxidoreductase activity	16491	molecular function	0.57084	0.02102	108.438	NaN	NaN	0.37088	0.79176	109	21021	6	6
oxidoreductase activity	16491	3824 catalytic activity	0.71695	0.13256	89.6813	NaN	NaN	0	0.00093	109	506	6	6
oxidoreductase activity	16491	15662 ATPase activity\, coupled to transmembrane movement of ions\, phosphorylative mechanism	0.94089	0.07036	4.7807	1.17814	0.2898	NaN	NaN	109	5	6	6
orexin receptor activity	16499	molecular function	0.88654	0.1818	1.99981	0.63464	0.29681	1	1	2	21128	0	0
apoptosis activator activity	16506	molecular function	0.71977	0.28801	2.99957	0.73579	0.62736	1	1	3	21127	0	0
apoptosis activator activity	16506	8369 obsolete molecular function	0.71634	0.32748	2.95361	0.23009	0.72457	1	1	3	191	0	0
latrotoxin receptor activity	16524	molecular function	0.07547	0.69918	4.99882	0.81206	0.39853	1	0.12675	5	21125	20	1
latrotoxin receptor activity	16524	4888 transmembrane receptor activity	0.04543	0.72353	4.77064	0.82232	0.27414	1	0.00095	5	104	20	1
G-protein coupled receptor activity\, unknown ligand	16526	molecular function	0.92517	0.17697	6.99768	0.84644	0.28076	1	1	7	21123	0	0
G-protein coupled receptor activity\, unknown ligand	16526	4930 G-protein coupled receptor activity	0.9287	0.21764	6.40244	0.86381	0.31139	1	1	7	75	0	0
cyclin-dependent protein kinase regulator activity	16538	molecular function	0.92089	0.30553	5.9983	0.83182	0.3471	1	1	6	21124	0	0
transcriptional activator activity	16563	molecular function	0.76588	0.65094	13.9907	0.89572	0.83503	1	1	14	21116	0	0
transcriptional activator activity	16563	30528 transcription regulator activity	0.30576	0.68886	12.6389	0.42142	0.61777	1	1	14	130	0	0
transcriptional repressor activity	16564	molecular function	0.02675	0.97077	17.9847	0.90884	0.03952	0.40472	1	18	21112	6	1
transcriptional repressor activity	16564	30528 transcription regulator activity	0.00208	0.96785	15.7959	0.18699	0.00711	0.0034	1	18	129	6	1
oxidoreductase activity\, acting on CH-OH group of donors	16614	molecular function	0.90023	0.09391	6.99768	0.84644	0.2515	1	1	7	21123	0	0
oxidoreductase activity\, acting on CH-OH group of donors	16614	16491 oxidoreductase activity	0.96435	0.29485	6.55046	0.85929	0.33188	1	1	7	102	0	0
oxidoreductase activity\, acting on the CH-OH group of donors\, NAD or NADP as acceptor	16616	molecular function	0.90023	0.09391	6.99768	0.84644	0.2515	1	1	7	21123	0	0
oxidoreductase activity\, acting on the aldehyde or oxo group of donors\, NAD or NADP as acceptor	16620	molecular function	0.72764	0.06437	3.99924	0.78329	0.20091	1	1	4	21126	0	0
oxidoreductase activity\, acting on the aldehyde or oxo group of donors\, NAD or NADP as acceptor	16620	16616 oxidoreductase activity\, acting on the CH-OH group of donors\, NAD or NADP as acceptor	0.81623	0.31047	2.54545	0.35345	0.64848	1	1	4	7	0	0
oxidoreductase activity\, acting on the CH-NH group of donors	16645	molecular function	0.96659	0.38851	3.99924	0.78329	0.36011	1	1	4	21126	0	0
oxidoreductase activity\, acting on the CH-NH group of donors	16645	16491 oxidoreductase activity	0.94731	0.29485	3.85321	0.79203	0.44876	1	1	4	105	0	0
oxidoreductase activity\, acting on the CH-NH group of donors	16645	16616 oxidoreductase activity\, acting on the CH-OH group of donors\, NAD or NADP as acceptor	0.67166	0.44385	2.54545	0.31216	0.78788	1	1	4	7	0	0
oxidoreductase activity\, acting on the CH-NH group of donors\, NAD or NADP as acceptor	16646	molecular function	0.96659	0.38851	3.99924	0.78329	0.36011	1	1	4	21126	0	0
oxidoreductase activity\, acting on the CH-NH group of donors\, NAD or NADP as acceptor	16646	16616 oxidoreductase activity\, acting on the CH-OH group of donors\, NAD or NADP as acceptor	0.67166	0.44385	2.54545	0.31216	0.78788	1	1	4	7	0	0
oxidoreductase activity\, acting on NADH or NADPH	16651	molecular function	0.71961	0.12907	32.9485	0.93364	0.12388	1	1	33	21097	0	0
oxidoreductase activity\, acting on NADH or NADPH	16651	16491 oxidoreductase activity	0.88687	0.07386	23.0092	0.968	0.13782	1	1	33	76	0	0
oxidoreductase activity\, acting on NADH or NADPH	16651	16616 oxidoreductase activity\, acting on the CH-OH group of donors\, NAD or NADP as acceptor	0.41784	0.72188	5.07692	0.84209	0.6128	1	1	33	6	0	0
oxidoreductase activity\, acting on peroxide as acceptor	16684	molecular function	0.45488	0.14047	4.99882	0.81206	0.46247	1	1	5	21125	0	0
oxidoreductase activity\, acting on peroxide as acceptor	16684	16491 oxidoreductase activity	0.52051	0.29889	4.77064	0.82232	0.52865	1	1	5	104	0	0
oxidoreductase activity\, acting on peroxide as acceptor	16684	16616 oxidoreductase activity\, acting on the CH-OH group of donors\, NAD or NADP as acceptor	0.26839	0.55734	2.91667	0.27616	0.87626	1	1	5	7	0	0
oxidoreductase activity\, acting on hydrogen as donor	16695	molecular function	0.36784	0.20997	2.99957	0.73579	0.68128	1	1	3	21127	0	0
oxidoreductase activity\, acting on hydrogen as donor	16695	16491 oxidoreductase activity	0.39144	0.26839	2.91743	0.74271	0.71796	1	1	3	106	0	0
oxidoreductase activity\, acting on hydrogen as donor	16695	16616 oxidoreductase activity\, acting on the CH-OH group of donors\, NAD or NADP as acceptor	0.37005	0.37005	2.1	0.21791	1	1	1	3	7	0	0
oxidoreductase activity\, acting on hydrogen as donor\, iron-sulfur protein as acceptor	16699	molecular function	0.36784	0.20997	2.99957	0.73579	0.68128	1	1	3	21127	0	0
oxidoreductase activity\, acting on hydrogen as donor\, iron-sulfur protein as acceptor	16699	16616 oxidoreductase activity\, acting on the CH-OH group of donors\, NAD or NADP as acceptor	0.37005	0.37005	2.1	0.21791	1	1	1	3	7	0	0
oxidoreductase activity\, acting on single donors with incorporation of molecular oxygen	16701	molecular function	0.32758	0.74494	1.99981	0.63464	0.60008	1	1	2	21128	0	0
oxidoreductase activity\, acting on single donors with incorporation of molecular oxygen	16701	16491 oxidoreductase activity	0.33504	0.69973	1.9633	0.63918	0.65973	1	1	2	107	0	0
oxidoreductase activity\, acting on single donors with incorporation of molecular oxygen	16701	16616 oxidoreductase activity\, acting on the CH-OH group of donors\, NAD or NADP as acceptor	0.34676	0.97862	1.55556	0.02059	0.5	1	1	2	7	0	0
oxidoreductase activity\, acting on single donors with incorporation of molecular oxygen\, incorporation of two atoms of oxygen	16702	molecular function	0.32758	0.74494	1.99981	0.63464	0.60008	1	1	2	21128	0	0
oxidoreductase activity\, acting on paired donors\, with incorporation or reduction of molecular oxygen	16705	molecular function	0.13516	0.92745	25.968	NaN	NaN	0.03618	0.50594	26	21104	15	4
oxidoreductase activity\, acting on paired donors\, with incorporation or reduction of molecular oxygen	16705	16491 oxidoreductase activity	0.0499	0.96847	19.7982	0.95409	NaN	NaN	0.00123	26	83	15	4
oxidoreductase activity\, acting on paired donors\, with incorporation or reduction of molecular oxygen\, 2-oxoglutarate as one donor\, and incorporation of one atom each of oxygen into both donors	16706	molecular function	0.37593	0.72095	6.99768	0.84644	0.78515	0.18264	0.17283	7	21123	29	2
oxidoreductase activity\, acting on paired donors\, with incorporation or reduction of molecular oxygen\, 2-oxoglutarate as one donor\, and incorporation of one atom each of oxygen into both donors	16706	16705 oxidoreductase activity\, acting on paired donors\, with incorporation or reduction of molecular oxygen	0.70096	0.53935	5.11538	0.9104	0.64375	0.00066	NaN	7	19	29	2
oxidoreductase activity\, acting on paired donors\, with incorporation or reduction of molecular oxygen\, NAD or NADH as one donor\, and incorporation of one atom of oxygen	16709	molecular function	0.03902	0.99631	12.992	NaN	NaN	0.31243	1	13	21117	8	1
oxidoreductase activity\, acting on paired donors\, with incorporation or reduction of molecular oxygen\, NAD or NADH as one donor\, and incorporation of one atom of oxygen	16709	4497 monooxygenase activity	0.28972	0.84012	4.95238	1.04771	0.29352	0.00062	1	13	8	8	1
oxidoreductase activity\, acting on paired donors\, with incorporation or reduction of molecular oxygen\, NAD or NADH as one donor\, and incorporation of one atom of oxygen	16709	16705 oxidoreductase activity\, acting on paired donors\, with incorporation or reduction of molecular oxygen	0.12288	0.73486	6.5	1	0.16617	0.00123	1	13	13	8	1
oxidoreductase activity\, acting on paired donors\, with incorporation or reduction of molecular oxygen\, reduced flavin or flavoprotein as one donor\, and incorporation of one atom of oxygen	16712	molecular function	0.25273	0.99981	1.99981	0.63464	0.22462	0.05599	1	2	21128	50	1
oxidoreductase activity\, acting on paired donors\, with incorporation or reduction of molecular oxygen\, reduced flavin or flavoprotein as one donor\, and incorporation of one atom of oxygen	16712	4497 monooxygenase activity	0.3038	0.7903	1.80952	0.66113	0.67488	9e-05	1	2	19	50	1
oxidoreductase activity\, acting on paired donors\, with incorporation or reduction of molecular oxygen\, reduced flavin or flavoprotein as one donor\, and incorporation of one atom of oxygen	16712	16705 oxidoreductase activity\, acting on paired donors\, with incorporation or reduction of molecular oxygen	0.29731	0.89373	1.84615	0.65543	0.53167	0.00019	1	2	24	50	1
oxidoreductase activity\, acting on paired donors\, with incorporation or reduction of molecular oxygen\, reduced iron-sulfur protein as one donor\, and incorporation of one atom of oxygen	16713	molecular function	0.93765	0.0466	1.99981	0.63464	0.10596	1	1	2	21128	0	0
oxidoreductase activity\, acting on paired donors\, with incorporation or reduction of molecular oxygen\, reduced iron-sulfur protein as one donor\, and incorporation of one atom of oxygen	16713	4497 monooxygenase activity	1	0.00852	1.80952	0.66113	0.02661	1	1	2	19	0	0
oxidoreductase activity\, acting on paired donors\, with incorporation or reduction of molecular oxygen\, reduced iron-sulfur protein as one donor\, and incorporation of one atom of oxygen	16713	16705 oxidoreductase activity\, acting on paired donors\, with incorporation or reduction of molecular oxygen	0.99087	0.01751	1.84615	0.65543	0.04854	1	1	2	24	0	0
oxidoreductase activity\, acting on superoxide radicals as acceptor	16721	molecular function	0.40922	0.40603	9.99527	0.87463	0.99125	1	1	10	21120	0	0
oxidoreductase activity\, acting on superoxide radicals as acceptor	16721	16491 oxidoreductase activity	0.3838	0.83779	9.08257	0.89071	0.65549	1	1	10	99	0	0
oxidoreductase activity\, acting on superoxide radicals as acceptor	16721	16705 oxidoreductase activity\, acting on paired donors\, with incorporation or reduction of molecular oxygen	0.79352	0.3965	7.22222	0.93064	0.44759	1	1	10	26	0	0
transferase activity	16740	molecular function	0.37033	0.00518	252.898	NaN	NaN	0.73055	0.91199	256	20874	4	10
transferase activity	16740	3824 catalytic activity	0.57987	0.09746	149.437	NaN	NaN	0	0	256	359	4	10
transferase activity	16740	16705 oxidoreductase activity\, acting on paired donors\, with incorporation or reduction of molecular oxygen	0.97185	0.05048	23.6028	NaN	NaN	NaN	NaN	256	26	4	10
transferase activity\, transferring one-carbon groups	16741	molecular function	0.77876	0.02927	70.7614	NaN	NaN	1	1	71	21059	0	0
transferase activity\, transferring one-carbon groups	16741	16740 transferase activity	0.92585	0.10577	51.3086	0.97627	NaN	1	1	71	185	0	0
transferase activity\, transferring one-carbon groups	16741	16705 oxidoreductase activity\, acting on paired donors\, with incorporation or reduction of molecular oxygen	0.93893	0.01226	19.0309	NaN	NaN	1	1	71	26	0	0
transferase activity\, transferring acyl groups	16746	molecular function	0.56764	0.20255	24.9704	0.92332	0.33805	1	1	25	21105	0	0
transferase activity\, transferring acyl groups	16746	16740 transferase activity	0.71641	0.4575	22.5586	0.93447	0.66249	1	1	25	231	0	0
transferase activity\, transferring acyl groups	16746	16705 oxidoreductase activity\, acting on paired donors\, with incorporation or reduction of molecular oxygen	0.95744	0.1187	12.7451	0.99779	0.07653	1	1	25	26	0	0
transferase activity\, transferring groups other than amino-acyl groups	16747	molecular function	0.71886	0.23637	1.99981	0.63464	0.49059	1	1	2	21128	0	0
transferase activity\, transferring groups other than amino-acyl groups	16747	16746 transferase activity\, transferring acyl groups	0.79509	0.32962	1.84	0.67114	0.58169	1	1	2	23	0	0
transferase activity\, transferring groups other than amino-acyl groups	16747	16705 oxidoreductase activity\, acting on paired donors\, with incorporation or reduction of molecular oxygen	0.88262	0.10483	1.85714	0.65378	0.22849	1	1	2	26	0	0
transferase activity\, transferring amino-acyl groups	16755	molecular function	0.56667	0.20092	3.99924	0.78329	0.55391	1	1	4	21126	0	0
transferase activity\, transferring amino-acyl groups	16755	16746 transferase activity\, transferring acyl groups	0.66057	0.40636	3.36	0.16847	0.91147	1	1	4	21	0	0
transferase activity\, transferring glycosyl groups	16757	molecular function	0.82	0.27799	7.99697	0.85783	0.32381	1	1	8	21122	0	0
transferase activity\, transferring glycosyl groups	16757	16740 transferase activity	0.90256	0.27421	7.75	0.86357	0.41784	1	1	8	248	0	0
transferase activity\, transferring hexosyl groups	16758	molecular function	0.79208	0.406	3.99924	0.78329	0.48662	1	1	4	21126	0	0
transferase activity\, transferring hexosyl groups	16758	16757 transferase activity\, transferring glycosyl groups	0.72266	0.72266	2	0.7991	1	1	1	4	4	0	0
transferase activity\, transferring alkyl or aryl (other than methyl) groups	16765	molecular function	0.26131	0.43231	67.7812	NaN	NaN	0.85942	0.84213	68	21062	3	2
transferase activity\, transferring alkyl or aryl (other than methyl) groups	16765	16740 transferase activity	0.21134	0.85396	49.9375	0.97467	NaN	0.01599	0.00962	68	188	3	2
transferase activity\, transferring phosphorus-containing groups	16772	molecular function	0.29895	0.56718	80.6895	0.95818	0.82822	0.40318	0.36669	81	21049	7	6
transferase activity\, transferring phosphorus-containing groups	16772	16740 transferase activity	0.03517	0.62868	55.3711	0.98117	0.11941	0	NaN	81	175	7	6
phosphotransferase activity\, alcohol group as acceptor	16773	molecular function	0.75931	0.54518	58.8353	0.95081	0.5783	0.50151	0.20776	59	21071	8	5
phosphotransferase activity\, alcohol group as acceptor	16773	16772 transferase activity\, transferring phosphorus-containing groups	0.76303	0.03671	16.0247	0.09257	0.22004	NaN	NaN	59	22	8	5
phosphotransferase activity\, phosphate group as acceptor	16776	molecular function	0.03385	0.87837	4.99882	0.81206	0.14639	1	1	5	21125	0	0
phosphotransferase activity\, phosphate group as acceptor	16776	16772 transferase activity\, transferring phosphorus-containing groups	0.04166	0.88603	4.69136	0.03193	0.14918	1	1	5	76	0	0
nucleotidyltransferase activity	16779	molecular function	0.06778	0.71696	4.99882	0.81206	0.28314	1	1	5	21125	0	0
nucleotidyltransferase activity	16779	16772 transferase activity\, transferring phosphorus-containing groups	0.09866	0.83395	4.69136	0.17189	0.32166	1	1	5	76	0	0
transferase activity\, transferring sulfur-containing groups	16782	molecular function	0.15894	0.96958	6.99768	0.84644	0.18823	1	1	7	21123	0	0
transferase activity\, transferring sulfur-containing groups	16782	16740 transferase activity	0.06863	0.97533	6.80859	0.85173	0.07167	1	1	7	249	0	0
hydrolase activity	16787	molecular function	0.43953	0.62738	157.804	0.97041	0.93922	0.66098	0.41505	159	20971	6	9
hydrolase activity	16787	3824 catalytic activity	0.0932	0.53536	117.893	0.98316	0.29819	0	0	159	456	6	9
hydrolase activity\, acting on ester bonds	16788	molecular function	0.06431	0.80335	40.9204	0.94068	0.35161	0.6934	1	41	21089	2	1
hydrolase activity\, acting on ester bonds	16788	16787 hydrolase activity	0.0732	0.91614	30.4277	0.33697	0.2995	0.00581	1	41	118	2	1
phosphoric monoester hydrolase activity	16791	molecular function	0.07757	0.95501	21.9771	0.91801	0.12214	0.46957	1	22	21108	5	1
hydrolase activity\, acting on glycosyl bonds	16798	molecular function	0.63461	0.00914	9.99527	0.87463	0.05075	1	1	10	21120	0	0
hydrolase activity\, acting on glycosyl bonds	16798	16787 hydrolase activity	0.61065	0.00334	9.37107	0.09173	0.04391	1	1	10	149	0	0
hydrolase activity\, acting on ether bonds	16801	molecular function	0.58029	0.45577	2.99957	0.73579	0.87637	1	1	3	21127	0	0
hydrolase activity\, acting on ether bonds	16801	16787 hydrolase activity	0.63691	0.3945	2.9434	0.64014	0.77577	1	1	3	156	0	0
ether hydrolase activity	16803	molecular function	0.58029	0.45577	2.99957	0.73579	0.87637	1	1	3	21127	0	0
hydrolase activity\, acting on carbon-nitrogen (but not peptide) bonds	16810	molecular function	0.07588	0.39113	22.975	0.9199	0.35454	0.48465	0.46404	23	21107	9	2
hydrolase activity\, acting on carbon-nitrogen (but not peptide) bonds	16810	16787 hydrolase activity	0.07023	0.42289	19.673	0.05565	0.2539	0.00326	0.00435	23	136	9	2
hydrolase activity\, acting on carbon-nitrogen (but not peptide) bonds	16810	8234 cysteine-type peptidase activity	0.37141	0.4257	11.9792	0.14007	0.64977	0.00109	NaN	23	25	9	2
hydrolase activity\, acting on carbon-nitrogen (but not peptide) bonds\, in linear amides	16811	molecular function	0.1399	0.47	2.99957	0.73579	0.6206	1	0.0781	3	21127	33	1
hydrolase activity\, acting on carbon-nitrogen (but not peptide) bonds\, in linear amides	16811	16810 hydrolase activity\, acting on carbon-nitrogen (but not peptide) bonds	0.41713	0.48549	2.6087	0.05502	0.96358	1	NaN	3	20	33	1
hydrolase activity\, acting on carbon-nitrogen (but not peptide) bonds\, in linear amides	16811	8234 cysteine-type peptidase activity	0.18125	0.47749	2.67857	0.0131	0.65579	1	NaN	3	25	33	1
hydrolase activity\, acting on carbon-nitrogen (but not peptide) bonds\, in cyclic amides	16812	molecular function	0.22526	0.1824	3.99924	0.78329	0.90171	1	1	4	21126	0	0
hydrolase activity\, acting on carbon-nitrogen (but not peptide) bonds\, in cyclic amides	16812	16810 hydrolase activity\, acting on carbon-nitrogen (but not peptide) bonds	0.51211	0.20222	3.30435	0.82983	0.65536	1	1	4	19	0	0
hydrolase activity\, acting on carbon-nitrogen (but not peptide) bonds\, in cyclic amides	16812	8234 cysteine-type peptidase activity	0.30198	0.17297	3.44828	0.30041	0.82475	1	1	4	25	0	0
hydrolase activity\, acting on carbon-nitrogen (but not peptide) bonds\, in linear amidines	16813	molecular function	0.18209	0.65237	11.9932	0.88661	0.35964	0.29233	1	12	21118	8	1
hydrolase activity\, acting on carbon-nitrogen (but not peptide) bonds\, in linear amidines	16813	16810 hydrolase activity\, acting on carbon-nitrogen (but not peptide) bonds	0.37677	0.95294	5.73913	0.91111	0.55857	NaN	1	12	11	8	1
hydrolase activity\, acting on carbon-nitrogen (but not peptide) bonds\, in linear amidines	16813	8234 cysteine-type peptidase activity	0.42808	0.59314	8.10811	0.2182	0.62646	0.00057	1	12	25	8	1
hydrolase activity\, acting on carbon-nitrogen (but not peptide) bonds\, in cyclic amidines	16814	molecular function	0.54245	0.41942	2.99957	0.73579	0.94924	1	1	3	21127	0	0
hydrolase activity\, acting on carbon-nitrogen (but not peptide) bonds\, in cyclic amidines	16814	16810 hydrolase activity\, acting on carbon-nitrogen (but not peptide) bonds	0.45083	0.13984	2.6087	0.13492	0.55274	1	1	3	20	0	0
hydrolase activity\, acting on carbon-nitrogen (but not peptide) bonds\, in cyclic amidines	16814	8234 cysteine-type peptidase activity	0.50598	0.42223	2.67857	0.27619	0.88189	1	1	3	25	0	0
hydrolase activity\, acting on acid anhydrides	16817	molecular function	0.86468	0.00454	15.9879	0.90294	0.07963	1	0.0007	16	21114	25	4
hydrolase activity\, acting on acid anhydrides	16817	16787 hydrolase activity	0.84231	0.00455	14.3899	0.00235	0.06997	1	NaN	16	143	25	4
hydrolase activity\, acting on acid anhydrides	16817	8234 cysteine-type peptidase activity	0.76177	0.03347	9.7561	0.03864	0.17695	1	NaN	16	25	25	4
hydrolase activity\, acting on acid anhydrides\, in phosphorus-containing anhydrides	16818	molecular function	0.86468	0.00454	15.9879	0.90294	0.07963	1	0.0007	16	21114	25	4
hydrolase activity\, acting on acid anhydrides\, in phosphorus-containing anhydrides	16818	8234 cysteine-type peptidase activity	0.76177	0.03347	9.7561	0.03864	0.17695	1	NaN	16	25	25	4
lyase activity	16829	molecular function	0.14311	0.89998	7.99697	0.85783	0.2662	1	1	8	21122	0	0
lyase activity	16829	3824 catalytic activity	0.10404	0.89236	7.89593	0.86015	0.19227	1	1	8	607	0	0
lyase activity	16829	8234 cysteine-type peptidase activity	0.28888	0.89426	6.06061	0.93589	0.5706	1	1	8	25	0	0
carbon-oxygen lyase activity	16835	molecular function	0.03338	0.84966	1.99981	0.63464	0.13058	1	1	2	21128	0	0
carbon-oxygen lyase activity	16835	16829 lyase activity	0.16053	0.63297	1.5	0.05179	0.64286	1	1	2	6	0	0
carbon-oxygen lyase activity	16835	8234 cysteine-type peptidase activity	0.04408	0.82275	1.85185	0.05753	0.17939	1	1	2	25	0	0
hydro-lyase activity	16836	molecular function	0.03338	0.84966	1.99981	0.63464	0.13058	1	1	2	21128	0	0
hydro-lyase activity	16836	8234 cysteine-type peptidase activity	0.04408	0.82275	1.85185	0.05753	0.17939	1	1	2	25	0	0
carbon-sulfur lyase activity	16846	molecular function	0.17406	0.49172	1.99981	0.63464	0.62457	1	1	2	21128	0	0
carbon-sulfur lyase activity	16846	16829 lyase activity	0.63297	0.16053	1.5	0.09472	0.64286	1	1	2	6	0	0
carbon-sulfur lyase activity	16846	8234 cysteine-type peptidase activity	0.32504	0.26743	1.85185	0.10951	0.96307	1	1	2	25	0	0
isomerase activity	16853	molecular function	0.51471	0.72993	4.99882	0.81206	0.80565	1	1	5	21125	0	0
isomerase activity	16853	3824 catalytic activity	0.48139	0.80482	4.95935	0.81378	0.67022	1	1	5	610	0	0
isomerase activity	16853	8234 cysteine-type peptidase activity	0.67534	0.67534	4.16667	0.94694	0.95562	1	1	5	25	0	0
intramolecular oxidoreductase activity	16860	molecular function	0.93759	0.40315	1.99981	0.63464	0.4443	1	1	2	21128	0	0
intramolecular oxidoreductase activity	16860	16853 isomerase activity	1	0.21457	1.2	0.61332	0.4	1	1	2	3	0	0
intramolecular oxidoreductase activity	16860	8234 cysteine-type peptidase activity	0.99223	0.26743	1.85185	0.64697	0.28694	1	1	2	25	0	0
intramolecular oxidoreductase activity\, transposing C=C bonds	16863	molecular function	0.93759	0.40315	1.99981	0.63464	0.4443	1	1	2	21128	0	0
intramolecular oxidoreductase activity\, transposing C=C bonds	16863	8234 cysteine-type peptidase activity	0.99223	0.26743	1.85185	0.64697	0.28694	1	1	2	25	0	0
intramolecular transferase activity	16866	molecular function	0.24217	0.94666	2.99957	0.73579	0.34606	1	1	3	21127	0	0
intramolecular transferase activity	16866	16853 isomerase activity	0.21457	1	1.2	0.61332	0.4	1	1	3	2	0	0
intramolecular transferase activity	16866	8234 cysteine-type peptidase activity	0.34492	0.95832	2.67857	0.8306	0.45755	1	1	3	25	0	0
intramolecular transferase activity\, phosphotransferases	16868	molecular function	0.24217	0.94666	2.99957	0.73579	0.34606	1	1	3	21127	0	0
intramolecular transferase activity\, phosphotransferases	16868	8234 cysteine-type peptidase activity	0.34492	0.95832	2.67857	0.8306	0.45755	1	1	3	25	0	0
ligase activity	16874	molecular function	0.3467	0.73363	67.7812	0.95426	0.47575	0.12594	1	68	21062	6	4
ligase activity	16874	3824 catalytic activity	0.18366	0.91109	60.4813	0.96193	0.18502	0	1	68	547	6	4		615
ligase activity	16874	8234 cysteine-type peptidase activity	0.39602	0.83279	16.0449	0.43929	0.65319	NaN	1	68	21	6	4
ligase activity\, forming carbon-oxygen bonds	16875	molecular function	0.52813	0.14912	37.9317	0.93831	0.35328	0.66567	1	38	21092	3	1
ligase activity\, forming carbon-oxygen bonds	16875	16874 ligase activity	0.99294	0.00406	16.7647	0.00813	0.01742	0.00539	1	38	30	3	1
ligase activity\, forming carbon-oxygen bonds	16875	8234 cysteine-type peptidase activity	0.68887	0.38006	13.5254	0.46758	0.67481	NaN	1	38	21	3	1
ligase activity\, forming aminoacyl-tRNA and related compounds	16876	molecular function	0.54218	0.10256	36.9352	0.93745	0.2647	0.65588	1	37	21093	3	1
ligase activity\, forming aminoacyl-tRNA and related compounds	16876	8234 cysteine-type peptidase activity	0.7294	0.31492	13.3965	0.46826	0.59338	NaN	1	37	21	3	1
ligase activity\, forming carbon-nitrogen bonds	16879	molecular function	0.01205	0.9918	29.9574	0.93028	0.03424	0.05203	1	30	21100	10	3
ligase activity\, forming carbon-nitrogen bonds	16879	16874 ligase activity	0.00406	0.99294	16.7647	0.00813	0.01742	NaN	1	30	38	10	3
ligase activity\, forming carbon-nitrogen bonds	16879	8234 cysteine-type peptidase activity	0.20034	0.98826	13.6364	0.32786	0.20792	NaN	1	30	25	10	3
acid-amino acid ligase activity	16881	molecular function	0.07123	0.97336	5.9983	0.83182	0.13944	0.15874	1	6	21124	17	1
acid-amino acid ligase activity	16881	16879 ligase activity\, forming carbon-nitrogen bonds	0.20848	0.84012	4.8	0.45132	0.45218	0.00057	1	6	24	17	1
acid-amino acid ligase activity	16881	8234 cysteine-type peptidase activity	0.08665	0.9191	4.83871	0.20089	0.23995	0.00028	1	6	25	17	1
ATPase activity	16887	molecular function	0.16819	0.83268	2.99957	0.73579	0.3243	1	1	3	21127	0	0
ATPase activity	16887	8234 cysteine-type peptidase activity	0.23484	0.8434	2.67857	0.68366	0.33417	1	1	3	25	0	0
oxidoreductase activity\, acting on the aldehyde or oxo group of donors	16903	molecular function	0.72764	0.06437	3.99924	0.78329	0.20091	1	1	4	21126	0	0
oxidoreductase activity\, acting on the aldehyde or oxo group of donors	16903	16491 oxidoreductase activity	0.82671	0.06406	3.85321	0.79203	0.15847	1	1	4	105	0	0
alpha-sialidase activity	16997	molecular function	0.82246	0.00306	3.99924	0.78329	0.01987	1	1	4	21126	0	0
alpha-sialidase activity	16997	4553 hydrolase activity\, hydrolyzing O-glycosyl compounds	1	0.00553	2	0.00981	0.02857	1	1	4	4	0	0
protein stabilization activity	17028	molecular function	0.66252	0.09417	4.99882	0.81206	0.39503	1	1	5	21125	0	0
protein stabilization activity	17028	8369 obsolete molecular function	0.55414	0.11314	4.87113	0.0319	0.53701	1	1	5	189	0	0
purine nucleotide binding	17076	molecular function	0.87385	0.08168	197.126	NaN	NaN	0.19767	0.27535	199	20931	8	15
alkane 1-monooxygenase activity	18685	molecular function	0.93765	0.0466	1.99981	0.63464	0.10596	1	1	2	21128	0	0
alkane 1-monooxygenase activity	18685	16705 oxidoreductase activity\, acting on paired donors\, with incorporation or reduction of molecular oxygen	0.99087	0.01751	1.84615	0.65543	0.04854	1	1	2	24	0	0
alkane 1-monooxygenase activity	18685	8757 S-adenosylmethionine-dependent methyltransferase activity	0.96338	0.05444	1.94521	0.64151	0.10843	1	1	2	71	0	0
guanyl nucleotide binding	19001	molecular function	0.71051	0.01294	22.975	0.9199	0.23064	0.48465	0.00293	23	21107	22	5
guanyl nucleotide binding	19001	17076 purine nucleotide binding	0.52963	0.0122	20.3417	0.93381	0.37485	0.0076	NaN	23	176	22	5
guanyl nucleotide binding	19001	8757 S-adenosylmethionine-dependent methyltransferase activity	0.25494	0.01612	17.3723	0.95188	0.70855	NaN	NaN	23	71	22	5
aminobutyraldehyde dehydrogenase activity	19145	molecular function	0.63772	0.11913	2.99957	0.73579	0.40049	1	1	3	21127	0	0
aminobutyraldehyde dehydrogenase activity	19145	16705 oxidoreductase activity\, acting on paired donors\, with incorporation or reduction of molecular oxygen	0.8434	0.03178	2.68966	0.76425	0.14209	1	1	3	26	0	0
aminobutyraldehyde dehydrogenase activity	19145	8757 S-adenosylmethionine-dependent methyltransferase activity	0.6588	0.37675	2.87838	0.74615	0.82643	1	1	3	71	0	0
carbohydrate phosphatase activity	19203	molecular function	0.28755	0.33181	1.99981	0.63464	0.96121	0.05599	1	2	21128	50	1
carbohydrate phosphatase activity	19203	16791 phosphoric monoester hydrolase activity	0.30083	0.30083	1.81818	3e-05	1	NaN	1	2	20	50	1
carbohydrate phosphatase activity	19203	4888 transmembrane receptor activity	0.27813	0.34866	1.96396	0.63909	0.93815	9e-05	1	2	109	50	1
carbohydrate phosphatase activity	19203	8757 S-adenosylmethionine-dependent methyltransferase activity	0.28102	0.30185	1.94521	0.64151	1	NaN	1	2	71	50	1
nucleobase\, nucleoside\, nucleotide kinase activity	19205	molecular function	0.31021	0.42063	1.99981	0.63464	0.88849	1	1	2	21128	0	0
nucleobase\, nucleoside\, nucleotide kinase activity	19205	16301 kinase activity	0.37363	0.37363	1.94805	0.16935	1	1	1	2	75	0	0
nucleobase\, nucleoside\, nucleotide kinase activity	19205	4888 transmembrane receptor activity	0.31936	0.44422	1.96396	0.63909	0.87667	1	1	2	109	0	0
nucleobase\, nucleoside\, nucleotide kinase activity	19205	8757 S-adenosylmethionine-dependent methyltransferase activity	0.13452	0.66069	1.94521	0.64151	0.44702	1	1	2	71	0	0
kinase regulator activity	19207	molecular function	0.90934	0.18992	6.99768	0.84644	0.29739	1	1	7	21123	0	0
kinase regulator activity	19207	30234 enzyme regulator activity	0.94288	0.0979	6.07547	0.23142	0.21202	1	1	7	46	0	0
kinase regulator activity	19207	4888 transmembrane receptor activity	0.92164	0.22621	6.57759	0.85848	0.34174	1	1	7	109	0	0
kinase regulator activity	19207	8757 S-adenosylmethionine-dependent methyltransferase activity	0.8994	0.6079	6.37179	0.86476	0.77968	1	1	7	71	0	0
phosphatase regulator activity	19208	molecular function	0.39799	0.85047	12.992	0.89145	0.52087	0.31243	1	13	21117	8	1
phosphatase regulator activity	19208	30234 enzyme regulator activity	0.31845	0.94506	9.75	0.23399	0.51916	NaN	1	13	39	8	1
phosphatase regulator activity	19208	4888 transmembrane receptor activity	0.24262	0.76042	11.6148	0.90819	0.51213	0.00062	1	13	109	8	1
phosphatase regulator activity	19208	8757 S-adenosylmethionine-dependent methyltransferase activity	0.09185	0.90402	10.9881	0.91657	0.18985	NaN	1	13	71	8	1
phosphatase inhibitor activity	19212	molecular function	0.39799	0.85047	12.992	0.89145	0.52087	0.31243	1	13	21117	8	1
phosphatase inhibitor activity	19212	4857 enzyme inhibitor activity	0.08641	0.98858	6.74074	0.01323	0.17403	NaN	1	13	14	8	1
phosphatase inhibitor activity	19212	8757 S-adenosylmethionine-dependent methyltransferase activity	0.09185	0.90402	10.9881	0.91657	0.18985	NaN	1	13	71	8	1
centromeric DNA binding	19237	molecular function	0.99678	0.32998	4.99882	NaN	NaN	1	0.12675	5	21125	20	1
centromeric DNA binding	19237	19888 protein phosphatase regulator activity	1	0.4034	3.61111	0.88989	1	1	NaN	5	13	20	1
centromeric DNA binding	19237	8757 S-adenosylmethionine-dependent methyltransferase activity	0.94372	0.45557	4.67105	NaN	NaN	1	NaN	5	71	20	1
deaminase activity	19239	molecular function	0.54245	0.41942	2.99957	0.73579	0.94924	1	1	3	21127	0	0
deaminase activity	19239	3824 catalytic activity	0.5405	0.5405	2.98537	0.73696	0.91957	1	1	3	612	0	0
deaminase activity	19239	19888 protein phosphatase regulator activity	0.55933	0.4034	2.4375	0.19085	0.8	1	1	3	13	0	0
deaminase activity	19239	8757 S-adenosylmethionine-dependent methyltransferase activity	0.40554	0.75349	2.87838	0.74615	0.56488	1	1	3	71	0	0
oxygen binding	19825	molecular function	0.1178	0.99981	1.99981	0.63464	0.12799	0.05599	1	2	21128	50	1
oxygen binding	19825	5488 binding	0.09004	0.99991	1.99587	0.63512	0.10062	0.00274	1	2	966	50	1
oxygen binding	19825	8757 S-adenosylmethionine-dependent methyltransferase activity	0.04352	1	1.94521	0.64151	0.0706	NaN	1	2	71	50	1
vitamin binding	19842	molecular function	0.27663	0.65771	3.99924	0.78329	0.86877	1	1	4	21126	0	0
vitamin binding	19842	5488 binding	0.22244	0.63687	3.98347	0.78421	0.75381	1	1	4	964	0	0
vitamin binding	19842	8757 S-adenosylmethionine-dependent methyltransferase activity	0.0987	0.60638	3.78667	0.79621	0.48667	1	1	4	71	0	0
IgE binding	19863	molecular function	0.97139	0.02938	2.99957	0.73579	0.09411	1	1	3	21127	0	0
IgE binding	19863	19865 immunoglobulin binding	1	0.0427	1.875	0.17342	0.10714	1	1	3	5	0	0
IgE binding	19863	8200 ion channel inhibitor activity	0.99989	0.04376	2.9	0.74423	0.10557	1	1	3	87	0	0
IgE binding	19863	8757 S-adenosylmethionine-dependent methyltransferase activity	0.97716	0.06107	2.87838	0.74615	0.17054	1	1	3	71	0	0
IgG binding	19864	molecular function	0.3556	0.5373	4.99882	0.81206	0.84195	0.13415	1	5	21125	20	1
IgG binding	19864	19865 immunoglobulin binding	0.0427	1	1.875	0.17342	0.10714	NaN	1	5	3	20	1
IgG binding	19864	8200 ion channel inhibitor activity	0.28653	0.75349	4.72826	0.82432	0.60537	0.00071	1	5	87	20	1
IgG binding	19864	8757 S-adenosylmethionine-dependent methyltransferase activity	0.22326	0.89701	4.67105	0.82705	0.39029	NaN	1	5	71	20	1
immunoglobulin binding	19865	molecular function	0.58279	0.18651	7.99697	0.85783	0.38561	0.20586	1	8	21122	13	1
immunoglobulin binding	19865	5515 protein binding	0.59202	0.20608	7.83069	0.86167	0.37368	0.00491	1	8	370	13	1
immunoglobulin binding	19865	8200 ion channel inhibitor activity	0.4772	0.34966	7.32632	0.87401	0.5781	0.00114	1	8	87	13	1
immunoglobulin binding	19865	8757 S-adenosylmethionine-dependent methyltransferase activity	0.37533	0.58546	7.18987	0.87754	0.89013	NaN	1	8	71	13	1
protein kinase regulator activity	19887	molecular function	0.90934	0.18992	6.99768	0.84644	0.29739	1	1	7	21123	0	0
protein kinase regulator activity	19887	8757 S-adenosylmethionine-dependent methyltransferase activity	0.8994	0.6079	6.37179	0.86476	0.77968	1	1	7	71	0	0
protein phosphatase regulator activity	19888	molecular function	0.39799	0.85047	12.992	0.89145	0.52087	0.31243	1	13	21117	8	1
protein phosphatase regulator activity	19888	8757 S-adenosylmethionine-dependent methyltransferase activity	0.09185	0.90402	10.9881	0.91657	0.18985	NaN	1	13	71	8	1
diacylglycerol binding	19992	molecular function	2e-05	0.96828	6.99768	0.84644	0.00016	1	1	7	21123	0	0
diacylglycerol binding	19992	8289 lipid binding	0.0004	1	3.23077	0.15777	0.00117	1	1	7	6	0	0
diacylglycerol binding	19992	8757 S-adenosylmethionine-dependent methyltransferase activity	1e-05	1	6.37179	0.86476	5e-05	1	1	7	71	0	0
manganese ion binding	30145	molecular function	0.02159	0.99211	7.99697	0.85783	0.05135	0.20586	1	8	21122	13	1
manganese ion binding	30145	46914 transition metal ion binding	0.02819	0.84975	6.96774	0.11238	0.09093	0.00076	1	8	54	13	1
manganese ion binding	30145	16616 oxidoreductase activity\, acting on the CH-OH group of donors\, NAD or NADP as acceptor	0.00671	1	3.73333	0.03521	0.04009	NaN	1	8	7	13	1
manganese ion binding	30145	8757 S-adenosylmethionine-dependent methyltransferase activity	0.00451	0.9754	7.18987	0.87754	0.02057	NaN	1	8	71	13	1
enzyme regulator activity	30234	molecular function	0.31607	0.70783	51.872	0.94751	0.72961	0.77682	1	52	21078	2	1
enzyme regulator activity	30234	8757 S-adenosylmethionine-dependent methyltransferase activity	0.01293	0.87761	30.0163	0.9891	0.10134	NaN	1	52	71	2	1
carbohydrate binding	30246	molecular function	0.34011	0.50222	26.9655	0.92634	0.97916	1	0.16159	27	21103	7	2
carbohydrate binding	30246	5488 binding	0.21026	0.52789	26.2469	0.9292	0.70799	1	0.00016	27	941	7	2
carbohydrate binding	30246	8757 S-adenosylmethionine-dependent methyltransferase activity	0.02669	0.66278	19.5612	0.96028	0.17139	1	NaN	27	71	7	2
polysaccharide binding	30247	molecular function	0.07578	0.79803	8.99617	0.86701	0.64412	1	1	9	21121	0	0
polysaccharide binding	30247	30246 carbohydrate binding	0.21895	0.68405	6	0.1151	0.69968	1	1	9	18	0	0
polysaccharide binding	30247	8757 S-adenosylmethionine-dependent methyltransferase activity	0.00852	0.84634	7.9875	0.88799	0.14171	1	1	9	71	0	0
guanylate cyclase regulator activity	30249	molecular function	0.32652	0.25668	1.99981	0.63464	0.89106	1	1	2	21128	0	0
guanylate cyclase regulator activity	30249	30234 enzyme regulator activity	0.48359	0.18406	1.92308	0.05327	0.63414	1	1	2	50	0	0
guanylate cyclase regulator activity	30249	30246 carbohydrate binding	0.58019	0.22042	1.86207	0.04244	0.63595	1	1	2	27	0	0
guanylate cyclase regulator activity	30249	8757 S-adenosylmethionine-dependent methyltransferase activity	0.13452	0.49635	1.94521	0.64151	0.5771	1	1	2	71	0	0
guanylate cyclase activator activity	30250	molecular function	0.32652	0.25668	1.99981	0.63464	0.89106	1	1	2	21128	0	0
guanylate cyclase activator activity	30250	8047 enzyme activator activity	0.71644	0.08031	1.76471	0.04499	0.36765	1	1	2	15	0	0
guanylate cyclase activator activity	30250	8757 S-adenosylmethionine-dependent methyltransferase activity	0.13452	0.49635	1.94521	0.64151	0.5771	1	1	2	71	0	0
protease inhibitor activity	30414	molecular function	0.28222	0.20765	5.9983	0.83182	0.69467	1	1	6	21124	0	0
protease inhibitor activity	30414	4857 enzyme inhibitor activity	0.47448	0.353	4.66667	0.24111	0.72627	1	1	6	21	0	0
protease inhibitor activity	30414	19239 deaminase activity	0.86557	0.56133	2	0.60912	0.85714	1	1	6	3	0	0
protease inhibitor activity	30414	8757 S-adenosylmethionine-dependent methyltransferase activity	0.06689	0.60226	5.53247	0.84858	0.55576	1	1	6	71	0	0
thiol-disulfide exchange intermediate activity	30508	molecular function	0.47433	0.63016	2.99957	0.73579	0.98297	0.08279	1	3	21127	33	1
thiol-disulfide exchange intermediate activity	30508	19239 deaminase activity	0.63297	0.63297	1.5	0.04439	1	NaN	1	3	3	33	1
thiol-disulfide exchange intermediate activity	30508	8757 S-adenosylmethionine-dependent methyltransferase activity	0.45557	0.61547	2.87838	0.74615	0.81578	NaN	1	3	71	33	1
transcription regulator activity	30528	molecular function	0.50487	0.01697	134.137	0.96781	0.03094	0.53233	1	135	20995	3	4
transcription regulator activity	30528	5198 structural molecule activity	0.72735	0.30121	49.033	0.02903	0.62657	NaN	1	135	77	3	4
transcription regulator activity	30528	19239 deaminase activity	0.66729	0.43348	2.93478	0.18868	0.62994	NaN	1	135	3	3	4
transcription regulator activity	30528	8757 S-adenosylmethionine-dependent methyltransferase activity	0.5333	0.81606	46.5291	1.01743	NaN	NaN	1	135	71	3	4
adenyl nucleotide binding	30554	molecular function	0.40377	0.111	174.534	NaN	NaN	0.22735	0.85141	176	20954	6	10
adenyl nucleotide binding	30554	17076 purine nucleotide binding	0.0122	0.79923	20.3417	1.06619	0.23192	NaN	0	176	23	6	10
adenyl nucleotide binding	30554	8757 S-adenosylmethionine-dependent methyltransferase activity	0.2611	0.92584	50.5911	NaN	NaN	NaN	NaN	176	71	6	10
neurotransmitter receptor activity	30594	molecular function	0.67877	0.04604	3.99924	0.78329	0.18483	1	1	4	21126	0	0
neurotransmitter receptor activity	30594	4872 receptor activity	0.70188	0.04973	3.91061	0.78852	0.19598	1	1	4	175	0	0
neurotransmitter receptor activity	30594	8757 S-adenosylmethionine-dependent methyltransferase activity	0.62476	0.19134	3.78667	0.79621	0.45762	1	1	4	71	0	0
protein binding\, bridging	30674	molecular function	0.00794	0.93597	14.9893	0.89952	0.00237	1	1	15	21115	0	0
protein binding\, bridging	30674	5515 protein binding	0.00386	0.9094	14.4048	0.90506	0.0018	1	1	15	363	0	0
protein binding\, bridging	30674	8757 S-adenosylmethionine-dependent methyltransferase activity	0.00055	1	12.3837	0.92632	0.0001	1	1	15	71	0	0
GTPase regulator activity	30695	molecular function	0.01336	0.79315	17.9847	0.90884	0.20074	1	1	18	21112	0	0
GTPase regulator activity	30695	30234 enzyme regulator activity	0.02345	0.6449	11.7692	0.2163	0.23298	1	1	18	34	0	0
GTPase regulator activity	30695	8757 S-adenosylmethionine-dependent methyltransferase activity	0.00494	0.92783	14.3596	0.93783	0.06375	1	1	18	71	0	0
amine N-methyltransferase activity	30748	molecular function	0.96588	0.02234	15.9879	0.90294	0.04835	1	1	16	21114	0	0
amine N-methyltransferase activity	30748	8757 S-adenosylmethionine-dependent methyltransferase activity	0.73748	0.23713	12.3944	0.93768	0.18414	1	1	16	55	0	0
amine N-methyltransferase activity	30748	8757 S-adenosylmethionine-dependent methyltransferase activity	0.73748	0.23713	12.3944	0.93768	0.18414	1	1	16	55	0	0
beta-2-microglobulin binding	30881	molecular function	0.99053	0.047	1.99981	0.63464	0.07491	1	1	2	21128	0	0
beta-2-microglobulin binding	30881	5515 protein binding	0.99868	0.03566	1.98942	0.63591	0.05477	1	1	2	376	0	0
beta-2-microglobulin binding	30881	8757 S-adenosylmethionine-dependent methyltransferase activity	0.99896	0.05444	1.94521	0.64151	0.07602	1	1	2	71	0	0
lipid antigen binding	30882	molecular function	0.99053	0.047	1.99981	0.63464	0.07491	1	1	2	21128	0	0
lipid antigen binding	30882	8289 lipid binding	1	0.01075	1.69231	0.60012	0.02564	1	1	2	11	0	0
lipid antigen binding	30882	8757 S-adenosylmethionine-dependent methyltransferase activity	0.99896	0.05444	1.94521	0.64151	0.07602	1	1	2	71	0	0
exogenous lipid antigen binding	30884	molecular function	0.99053	0.047	1.99981	0.63464	0.07491	1	1	2	21128	0	0
exogenous lipid antigen binding	30884	8289 lipid binding	1	0.01075	1.69231	0.60012	0.02564	1	1	2	11	0	0
exogenous lipid antigen binding	30884	8757 S-adenosylmethionine-dependent methyltransferase activity	0.99896	0.05444	1.94521	0.64151	0.07602	1	1	2	71	0	0
neurotransmitter binding	42165	molecular function	0.67877	0.04604	3.99924	0.78329	0.18483	1	1	4	21126	0	0
neurotransmitter binding	42165	5488 binding	0.71048	0.05748	3.98347	0.78421	0.20805	1	1	4	964	0	0
neurotransmitter binding	42165	8757 S-adenosylmethionine-dependent methyltransferase activity	0.62476	0.19134	3.78667	0.79621	0.45762	1	1	4	71	0	0
phosphoric ester hydrolase activity	42578	molecular function	0.06341	0.51386	11.9932	0.88661	0.70952	1	1	12	21118	0	0
phosphoric ester hydrolase activity	42578	16788 hydrolase activity\, acting on ester bonds	0.44598	0.33318	8.4878	0.00075	0.52836	1	1	12	29	0	0
phosphoric ester hydrolase activity	42578	8757 S-adenosylmethionine-dependent methyltransferase activity	0.01601	0.84756	10.2651	0.91081	0.09229	1	1	12	71	0	0
ribonucleoprotein binding	43021	molecular function	0.58152	0.76541	1.99981	0.63464	0.83258	1	1	2	21128	0	0
ribonucleoprotein binding	43021	5488 binding	0.53474	0.76934	1.99587	0.63512	0.77481	1	1	2	966	0	0
ribonucleoprotein binding	43021	8757 S-adenosylmethionine-dependent methyltransferase activity	0.4438	0.86139	1.94521	0.64151	0.62411	1	1	2	71	0	0
ion binding	43167	molecular function	0.45439	0.19555	175.517	0.972	0.56404	0.1261	0.85406	177	20953	6	11
ion binding	43167	5488 binding	0.16961	0.45932	144.635	0.98007	0.86714	0	0.0002	177	791	6	11
ion binding	43167	8757 S-adenosylmethionine-dependent methyltransferase activity	0.09603	0.97139	49.1265	1.02425	NaN	NaN	NaN	177	68	6	11
cation binding	43169	molecular function	0.42823	0.07866	157.804	0.97041	0.29408	0.07982	0.92812	159	20971	6	10
cation binding	43169	43167 ion binding	0.87156	0.0534	16.1695	0.06577	0.1251	NaN	NaN	159	18	6	10
cation binding	43169	8757 S-adenosylmethionine-dependent methyltransferase activity	0.13622	0.98461	47.63	1.02221	NaN	NaN	NaN	159	68	6	10
sequence-specific DNA binding	43565	molecular function	0.99678	0.32998	4.99882	NaN	NaN	1	0.12675	5	21125	20	1
sequence-specific DNA binding	43565	3677 DNA binding	0.99949	0.39065	4.89754	0.81652	NaN	1	0.00047	5	239	20	1
sequence-specific DNA binding	43565	8757 S-adenosylmethionine-dependent methyltransferase activity	0.94372	0.45557	4.67105	NaN	NaN	1	NaN	5	71	20	1
translation regulator activity	45182	molecular function	0.50907	0.72865	4.99882	0.81206	0.99222	1	1	5	21125	0	0
translation regulator activity	45182	16209 antioxidant activity	0.36666	0.77815	2.5	0.02132	0.69048	1	1	5	5	0	0
interleukin-20 receptor binding	45517	molecular function	0.17276	0.99946	1.99981	0.63464	0.17182	0.05599	1	2	21128	50	1
interleukin-20 receptor binding	45517	5125 cytokine activity	0.29115	1	1.87879	0.00149	0.25766	NaN	1	2	31	50	1
interleukin-20 receptor binding	45517	16209 antioxidant activity	0.07927	1	1.42857	0.00136	0.19048	NaN	1	2	5	50	1
metal ion binding	46872	molecular function	0.45439	0.19555	175.517	0.972	0.56404	0.1261	0.85406	177	20953	6	11
metal ion binding	46872	16209 antioxidant activity	0.20834	0.498	4.86264	0.00851	0.58465	NaN	NaN	177	5	6	11
metal ion transporter activity	46873	molecular function	0.26183	0.94585	2.99957	0.73579	0.29002	1	1	3	21127	0	0
metal ion transporter activity	46873	15075 ion transporter activity	0.19511	0.99497	2.88462	0.68786	0.14562	1	1	3	75	0	0
metal ion transporter activity	46873	16209 antioxidant activity	0.11192	1	1.875	0.12442	0.14286	1	1	3	5	0	0
transition metal ion binding	46914	molecular function	0.07133	0.84607	61.8181	0.95204	0.24635	0.2562	1	62	21068	5	3
transition metal ion binding	46914	43169 cation binding	0.0136	0.98283	37.8239	0.00274	0.01625	0	1	62	97	5	3
transition metal ion binding	46914	46872 metal ion binding	0.0267	0.9917	40.2825	0.00102	0.05253	0	1	62	115	5	3
transition metal ion binding	46914	16209 antioxidant activity	0.12934	0.83564	4.62687	0.02609	0.2672	NaN	1	62	5	5	3
carboxylic acid transporter activity	46943	molecular function	0.53252	0.55609	2.99957	0.73579	0.81554	1	1	3	21127	0	0
carboxylic acid transporter activity	46943	46872 metal ion binding	0.48484	0.48484	2.95	0.9703	0.85372	1	1	3	177	0	0
carboxylic acid transporter activity	46943	16209 antioxidant activity	0.11192	0.57839	1.875	0.03097	0.57143	1	1	3	5	0	0
protein heterodimerization activity	46982	molecular function	0.99053	0.047	1.99981	0.63464	0.07491	1	1	2	21128	0	0
protein dimerization activity	46983	molecular function	0.99053	0.047	1.99981	0.63464	0.07491	1	1	2	21128	0	0
protein dimerization activity	46983	5515 protein binding	0.99868	0.03566	1.98942	0.63591	0.05477	1	1	2	376	0	0
4-trimethylammoniobutyraldehyde dehydrogenase activity	47105	molecular function	0.63772	0.11913	2.99957	0.73579	0.40049	1	1	3	21127	0	0
fucose-1-phosphate guanylyltransferase activity	47341	molecular function	0.18142	0.36699	2.99957	0.73579	0.72163	1	1	3	21127	0	0
fucose-1-phosphate guanylyltransferase activity	47341	16779 nucleotidyltransferase activity	1	0.21457	1.2	0.03416	0.4	1	1	3	2	0	0
fucose-1-phosphate guanylyltransferase activity	47341	16776 phosphotransferase activity\, phosphate group as acceptor	1	0.34194	1.875	0.19541	0.39286	1	1	3	5	0	0
leukotriene-B4 20-monooxygenase activity	50051	molecular function	0.08202	0.99719	9.99527	NaN	NaN	0.25033	1	10	21120	10	1
leukotriene-B4 20-monooxygenase activity	50051	16709 oxidoreductase activity\, acting on paired donors\, with incorporation or reduction of molecular oxygen\, NAD or NADH as one donor\, and incorporation of one atom of oxygen	0.17034	0.75337	2.30769	1.18931	0	NaN	1	10	3	10	1
unspecific monooxygenase activity	50381	molecular function	0.25273	0.99981	1.99981	0.63464	0.22462	0.05599	1	2	21128	50	1
unspecific monooxygenase activity	50381	16773 phosphotransferase activity\, alcohol group as acceptor	0.27059	0.99855	1.93443	0.05194	0.24839	0.00019	1	2	59	50	1
vitamin transporter activity	51183	molecular function	0.46132	0.54879	2.99957	0.73579	0.97108	1	1	3	21127	0	0
vitamin transporter activity	51183	5215 transporter activity	0.32708	0.46879	2.96875	0.73834	0.93335	1	1	3	285	0	0
vitamin transporter activity	51183	16881 acid-amino acid ligase activity	1	0.56133	2	0.96334	0.54762	1	1	3	6	0	0
cofactor transporter activity	51184	molecular function	0.46132	0.54879	2.99957	0.73579	0.97108	1	1	3	21127	0	0
cofactor transporter activity	51184	5215 transporter activity	0.32708	0.46879	2.96875	0.73834	0.93335	1	1	3	285	0	0
cofactor transporter activity	51184	16881 acid-amino acid ligase activity	1	0.56133	2	0.96334	0.54762	1	1	3	6	0	0
dioxygenase activity	51213	molecular function	0.32758	0.74494	1.99981	0.63464	0.60008	1	1	2	21128	0	0
dioxygenase activity	51213	16491 oxidoreductase activity	0.33504	0.69973	1.9633	0.63918	0.65973	1	1	2	107	0	0
dioxygenase activity	51213	16881 acid-amino acid ligase activity	0.63297	0.63297	1.5	0.46518	1	1	1	2	6	0	0

## Sheet: Exon_Thymoma_BP_GO_analysis_TP
		Table S3
name	GO ID	parent name	KS-P (high)	KS-P (low)	KS accur	VAR	KW	Fishex high	Fishex low	N child	N parent	% Changed Genes	# Changed genes
reproduction	3	biological process	0.84094	0.05519	16.9863	0.90603	0.35306	1	1	17	21113	0	0
biological process unknown	4	biological process	0.44455	0.07126	123.272	0.96638	0.24699	0.27242	0.96564	124	21006	5	6
urea cycle intermediate metabolism	51	biological process	0.02159	0.99211	7.99697	0.85783	0.05135	0.20586	1	8	21122	13	1
urea cycle intermediate metabolism	51	6807 nitrogen compound metabolism	0.01382	0.9661	7.24706	0.87605	0.03711	0.00038	1	8	77	13	1
urea cycle intermediate metabolism	51	8152 metabolism	0.01766	0.96155	7.90361	0.85997	0.0411	0.00604	1	8	656	13	1
protein import into nucleus\, docking	59	biological process	0.23332	0.79802	2.99957	0.73579	0.39537	1	1	3	21127	0	0
protein import into nucleus\, docking	59	7046 ribosome biogenesis	0.16875	0.8648	2.4375	0.73396	0.35	1	1	3	13	0	0
regulation of progression through cell cycle	74	biological process	0.08193	0.97721	48.8864	0.94588	0.20885	0.16098	1	49	21081	6	3
regulation of progression through cell cycle	74	7017 microtubule-based process	0.48237	0.70381	6.87719	0.99677	0.71318	NaN	1	49	8	6	3
regulation of cyclin dependent protein kinase activity	79	biological process	0.16999	0.99562	3.99924	0.78329	0.18677	0.10884	1	4	21126	25	1
regulation of cyclin dependent protein kinase activity	79	74 regulation of progression through cell cycle	0.35329	0.94833	3.67347	0.23976	0.39083	0.00038	1	4	45	25	1
M phase of mitotic cell cycle	87	biological process	0.97287	0.20436	11.9932	NaN	NaN	1	0.27771	12	21118	8	1
M phase of mitotic cell cycle	87	279 M phase	0.27919	0.52155	2.4	1.202	0	1	NaN	12	3	8	1
sulfur amino acid metabolism	96	biological process	0.35687	0.71115	3.99924	0.78329	0.68629	0.10884	1	4	21126	25	1
sulfur amino acid metabolism	96	6520 amino acid metabolism	0.39608	0.57706	3.68627	0.00931	0.79273	0.00038	1	4	47	25	1
negative regulation of transcription from RNA polymerase II promoter	122	biological process	0.84473	0.21598	7.99697	0.85783	0.33244	0.20586	1	8	21122	13	1
negative regulation of transcription from RNA polymerase II promoter	122	6357 regulation of transcription from RNA polymerase II promoter	0.72724	0.52204	4.44444	0.4788	0.76183	NaN	1	8	10	13	1
MAPKKK cascade	165	biological process	0.54677	0.57332	2.99957	0.73579	0.98244	1	1	3	21127	0	0
polysaccharide biosynthesis	271	biological process	0.99504	0.27009	2.99957	0.73579	0.23752	1	0.0781	3	21127	33	1
mitotic cell cycle	278	biological process	0.93331	0.43167	12.992	NaN	NaN	1	0.29703	13	21117	8	1
mitotic cell cycle	278	7049 cell cycle	0.98616	0.27893	10.2295	0.92748	NaN	1	NaN	13	48	8	1
mitotic cell cycle	278	19752 carboxylic acid metabolism	0.14907	0.73746	4.10526	1.08361	0	1	NaN	13	6	8	1
M phase	279	biological process	0.98071	0.2721	14.9893	NaN	NaN	1	0.33415	15	21115	7	1
M phase	279	7049 cell cycle	0.99767	0.06736	11.25	0.94	NaN	1	NaN	15	45	7	1
M phase	279	19752 carboxylic acid metabolism	0.23871	0.79517	4.28571	1.09401	0.45956	1	NaN	15	6	7	1
RNA splicing\, via transesterification reactions	375	biological process	0.25299	0.85927	2.99957	0.73579	0.42986	1	1	3	21127	0	0
RNA splicing\, via transesterification reactions with bulged adenosine as nucleophile	377	biological process	0.25299	0.85927	2.99957	0.73579	0.42986	1	1	3	21127	0	0
nuclear mRNA splicing\, via spliceosome	398	biological process	0.25299	0.85927	2.99957	0.73579	0.42986	1	1	3	21127	0	0
cellular morphogenesis	902	biological process	0.83544	0.55958	8.99617	0.86701	0.66166	1	1	9	21121	0	0
cellular morphogenesis	902	9653 morphogenesis	0.82849	0.71571	6.75	0.74469	0.79816	1	1	9	27	0	0
cellular morphogenesis	902	16043 cell organization and biogenesis	0.75555	0.51506	7.96154	0.808	0.72491	1	1	9	69	0	0
cellular morphogenesis during differentiation	904	biological process	0.7322	0.04837	2.99957	0.73579	0.19508	1	1	3	21127	0	0
cellular morphogenesis during differentiation	904	902 cellular morphogenesis	0.86557	0.02708	2	0.06714	0.16667	1	1	3	6	0	0
cytokinesis	910	biological process	0.73587	0.22197	6.99768	0.84644	0.50658	1	1	7	21123	0	0
skeletal development	1501	biological process	0.3899	0.53018	14.9893	0.89952	0.93913	1	1	15	21115	0	0
skeletal development	1501	48513 organ development	0.95694	0.16485	8.75	0.04469	0.35209	1	1	15	21	0	0
cell activation	1775	biological process	0.98957	0.07971	3.99924	0.78329	0.03782	1	1	4	21126	0	0
cell activation	1775	50874 organismal physiological process	0.99107	0.10609	3.93916	0.78682	0.04915	1	1	4	259	0	0
carbohydrate metabolism	5975	biological process	0.93233	0.28814	38.928	0.93913	0.28351	0.67518	0.08496	39	21091	10	4
carbohydrate metabolism	5975	43170 macromolecule metabolism	0.87957	0.09962	29.434	0.00305	0.15124	0.00736	NaN	39	120	10	4
carbohydrate metabolism	5975	44238 primary metabolism	0.97011	0.12328	21.7159	0.00548	0.07092	0.00369	NaN	39	49	10	4
polysaccharide metabolism	5976	biological process	0.26042	0.76328	5.9983	0.83182	0.80491	1	0.1501	6	21124	17	1
polysaccharide metabolism	5976	5975 carbohydrate metabolism	0.06342	0.87636	5.07692	0.59562	0.33044	1	0.00057	6	33	17	1
polysaccharide metabolism	5976	43283 biopolymer metabolism	0.14352	0.52169	5.02703	0.05029	0.7572	1	NaN	6	31	17	1
monosaccharide metabolism	5996	biological process	0.6513	0.39922	9.99527	0.87463	0.79835	0.25033	0.23745	10	21120	20	2
monosaccharide metabolism	5996	6066 alcohol metabolism	0.33767	0.45963	7.14286	0.00075	0.72865	0.00047	NaN	10	25	20	2
fucose metabolism	6004	biological process	0.18142	0.36699	2.99957	0.73579	0.72163	1	1	3	21127	0	0
glucose metabolism	6006	biological process	0.86163	0.34262	4.99882	0.81206	0.50407	1	0.12675	5	21125	20	1
chitin metabolism	6030	biological process	0.03708	0.92696	2.99957	0.73579	0.12588	1	1	3	21127	0	0
amino sugar metabolism	6040	biological process	0.18841	0.90684	3.99924	0.78329	0.37987	1	1	4	21126	0	0
amino sugar metabolism	6040	9308 amine metabolism	0.34942	0.95881	2.4	0.72811	0.60952	1	1	4	6	0	0
glucosamine metabolism	6041	biological process	0.18841	0.90684	3.99924	0.78329	0.37987	1	1	4	21126	0	0
N-acetylglucosamine metabolism	6044	biological process	0.18841	0.90684	3.99924	0.78329	0.37987	1	1	4	21126	0	0
alcohol metabolism	6066	biological process	0.86685	0.25525	34.942	0.93563	0.42884	0.26129	0.61302	35	21095	9	3
alcohol metabolism	6066	44237 cellular metabolism	0.61264	0.25092	28.484	0.95465	0.53086	2e-05	NaN	35	153	9	3
aldehyde metabolism	6081	biological process	0.49198	0.15084	4.99882	0.81206	0.65132	1	1	5	21125	0	0
aldehyde metabolism	6081	44237 cellular metabolism	0.66078	0.29181	4.84076	0.81909	0.65642	1	1	5	152	0	0
organic acid metabolism	6082	biological process	0.46756	0.6353	81.6818	NaN	NaN	0.08202	0.89213	82	21048	7	6
organic acid metabolism	6082	44237 cellular metabolism	0.28032	0.67637	51.7117	0.98612	NaN	NaN	NaN	82	140	7	6
generation of precursor metabolites and energy	6091	biological process	0.68248	0.02073	73.7408	NaN	NaN	0.3492	0.8659	74	21056	5	4
generation of precursor metabolites and energy	6091	44237 cellular metabolism	0.88484	0.06602	39.9876	0.9951	NaN	NaN	NaN	74	87	5	4
electron transport	6118	biological process	0.56498	0.05501	66.7875	NaN	NaN	0.29476	1	67	21063	4	3
electron transport	6118	6091 generation of precursor metabolites and energy	0.32082	0.97601	6.33784	1.13417	0.26776	NaN	1	67	7	4	3
electron transport	6118	6810 transport	0.74287	0.42344	52.8391	NaN	NaN	0	1	67	250	4	3
oxidative phosphorylation	6119	biological process	0.71961	0.037	32.9485	0.93364	0.10275	1	1	33	21097	0	0
oxidative phosphorylation	6119	6091 generation of precursor metabolites and energy	0.85178	0.32495	18.2838	0.99005	0.19941	1	1	33	41	0	0
mitochondrial electron transport\, NADH to ubiquinone	6120	biological process	0.77925	0.04654	29.9574	0.93028	0.06933	1	1	30	21100	0	0
nucleobase\, nucleoside\, nucleotide and nucleic acid metabolism	6139	biological process	0.32775	0.37551	338.4	0.98019	0.59066	0.62939	0.9952	344	20786	3	12
nucleobase\, nucleoside\, nucleotide and nucleic acid metabolism	6139	44237 cellular metabolism	0.03147	0.39576	91.1453	1.01867	NaN	NaN	NaN	344	124	3	12
nucleobase\, nucleoside\, nucleotide and nucleic acid metabolism	6139	44238 primary metabolism	0.75642	0.34602	46.6734	0.23641	0.96752	NaN	NaN	344	54	3	12
purine nucleotide metabolism	6163	biological process	0.46144	0.35594	13.9907	0.89572	0.96696	1	1	14	21116	0	0
purine nucleotide metabolism	6163	9117 nucleotide metabolism	0.7854	0.53881	3.11111	0.52126	0.85359	1	1	14	4	0	0
purine nucleotide biosynthesis	6164	biological process	0.46144	0.35594	13.9907	0.89572	0.96696	1	1	14	21116	0	0
DNA metabolism	6259	biological process	0.7084	0.1638	49.8817	0.94644	0.24829	0.76355	0.74251	50	21080	4	2
DNA metabolism	6259	6139 nucleobase\, nucleoside\, nucleotide and nucleic acid metabolism	0.68175	0.19867	42.7326	0.55044	0.30816	0.01878	0.00473	50	294	4	2
DNA metabolism	6259	43283 biopolymer metabolism	0.98379	0.0892	19.1358	0.07899	0.23581	NaN	NaN	50	31	4	2
DNA replication	6260	biological process	0.74734	0.21633	14.9893	0.89952	0.49121	1	1	15	21115	0	0
DNA replication	6260	6259 DNA metabolism	0.62484	0.54661	10.5	0.02071	0.92409	1	1	15	35	0	0
DNA replication	6260	43283 biopolymer metabolism	0.88166	0.28821	10.1087	0.51272	0.4967	1	1	15	31	0	0
DNA-dependent DNA replication	6261	biological process	0.77967	0.29009	11.9932	0.88661	0.67662	1	1	12	21118	0	0
DNA-dependent DNA replication	6261	6260 DNA replication	0.22	0.5102	2.4	0.62686	0.63297	1	1	12	3	0	0
DNA-dependent DNA replication	6261	43283 biopolymer metabolism	0.61689	0.34142	8.65116	0.7948	0.75545	1	1	12	31	0	0
DNA replication initiation	6270	biological process	0.86227	0.42975	7.99697	0.85783	0.60084	1	1	8	21122	0	0
DNA replication initiation	6270	6261 DNA-dependent DNA replication	0.90163	0.66086	2.66667	0.976	0.80808	1	1	8	4	0	0
DNA replication initiation	6270	43283 biopolymer metabolism	0.73794	0.32746	6.35897	1.04318	0.61391	1	1	8	31	0	0
DNA repair	6281	biological process	0.82877	0.42101	9.99527	0.87463	0.50621	1	0.23745	10	21120	10	1
DNA repair	6281	6259 DNA metabolism	0.83654	0.57892	8	0.03672	0.74332	1	NaN	10	40	10	1
DNA recombination	6310	biological process	0.68362	0.29636	5.9983	0.83182	0.67258	1	1	6	21124	0	0
DNA recombination	6310	6259 DNA metabolism	0.34596	0.40478	5.28	0.46305	0.98809	1	1	6	44	0	0
DNA packaging	6323	biological process	0.50149	0.10318	20.9791	0.91598	0.4624	1	1	21	21109	0	0
DNA packaging	6323	6259 DNA metabolism	0.25117	0.38841	12.18	0.00294	0.76059	1	1	21	29	0	0
establishment and/or maintenance of chromatin architecture	6325	biological process	0.56151	0.18056	18.9829	0.91142	0.51487	1	1	19	21111	0	0
chromatin assembly or disassembly	6333	biological process	0.52198	0.11124	9.99527	0.87463	0.71337	1	1	10	21120	0	0
chromatin assembly or disassembly	6333	6325 establishment and/or maintenance of chromatin architecture	0.2484	0.29403	4.73684	0.05051	0.8276	1	1	10	9	0	0
chromatin assembly or disassembly	6333	7001 chromosome organization and biogenesis (sensu Eukaryota)	0.35298	0.35298	5	0.06504	0.9698	1	1	10	10	0	0
nucleosome assembly	6334	biological process	0.52198	0.11124	9.99527	0.87463	0.71337	1	1	10	21120	0	0
nucleosome assembly	6334	6461 protein complex assembly	0.92629	0.00074	5.65217	0.03025	0.00392	1	1	10	13	0	0
transcription	6350	biological process	0.60259	0.19039	212.812	0.97468	0.2404	0.72871	0.9799	215	20915	3	7
transcription	6350	6139 nucleobase\, nucleoside\, nucleotide and nucleic acid metabolism	0.80967	0.05984	80.625	0.7938	0.18228	NaN	NaN	215	129	3	7
transcription\, DNA-dependent	6351	biological process	0.6196	0.15161	207.913	0.97437	0.19757	0.84793	0.97742	210	20920	3	6
transcription\, DNA-dependent	6351	6350 transcription	0.88311	0.37261	4.88372	0.04105	0.38671	NaN	NaN	210	5	3	6
RNA elongation	6354	biological process	0.10121	0.97158	3.99924	0.78329	0.11587	1	1	4	21126	0	0
RNA elongation	6354	6351 transcription\, DNA-dependent	0.07053	0.97832	3.92381	0.70233	0.07611	1	1	4	206	0	0
regulation of transcription\, DNA-dependent	6355	biological process	0.66164	0.24821	196.145	0.97358	0.28342	0.81409	0.9702	198	20932	3	6
regulation of transcription\, DNA-dependent	6355	6351 transcription\, DNA-dependent	0.32002	0.777	11.3143	0.22791	0.50425	NaN	NaN	198	12	3	6
regulation of transcription from RNA polymerase II promoter	6357	biological process	0.87395	0.19503	17.9847	0.90884	0.38062	0.40472	1	18	21112	6	1
regulation of transcription from RNA polymerase II promoter	6357	6355 regulation of transcription\, DNA-dependent	0.85536	0.26473	16.3636	0.44533	0.49957	0.00255	1	18	180	6	1
regulation of transcription from RNA polymerase II promoter	6357	6366 transcription from RNA polymerase II promoter	0.13197	0.64336	8.18182	0.02352	0.27006	NaN	1	18	15	6	1
transcription from RNA polymerase I promoter	6360	biological process	0.83446	0.05616	4.99882	0.81206	0.21871	1	1	5	21125	0	0
transcription from RNA polymerase I promoter	6360	6351 transcription\, DNA-dependent	0.79729	0.08795	4.88095	0.07543	0.34036	1	1	5	205	0	0
rRNA processing	6364	biological process	0.12255	0.72016	6.99768	0.84644	0.44483	1	1	7	21123	0	0
rRNA processing	6364	6396 RNA processing	0.27645	0.48519	5.46875	0.01111	1	1	1	7	25	0	0
rRNA processing	6364	7046 ribosome biogenesis	0.03081	1	3.23077	0.60089	0.04779	1	1	7	6	0	0
transcription from RNA polymerase II promoter	6366	biological process	0.89563	0.00949	32.9485	0.93364	0.00988	0.61378	1	33	21097	3	1
transcription from RNA polymerase II promoter	6366	6351 transcription\, DNA-dependent	0.98617	0.02259	27.8143	0.75072	0.01713	0.00468	1	33	177	3	1
transcription from RNA polymerase II promoter	6366	7046 ribosome biogenesis	0.9271	0.12606	9.32609	0.13001	0.21336	NaN	1	33	13	3	1
mRNA splicing	6371	biological process	0.78738	0.07787	4.99882	0.81206	0.1689	1	1	5	21125	0	0
mRNA splicing	6371	8371 obsolete biological process	0.81553	0.0583	4.47917	0.20776	0.15629	1	1	5	43	0	0
transcription from RNA polymerase III promoter	6383	biological process	0.7751	0.46223	2.99957	0.73579	0.59892	1	1	3	21127	0	0
transcription from RNA polymerase III promoter	6383	6351 transcription\, DNA-dependent	0.7833	0.54395	2.95714	0.49264	0.73046	1	1	3	207	0	0
RNA processing	6396	biological process	0.11442	0.99841	31.9515	0.93257	0.11728	0.22958	1	32	21098	6	2
mRNA processing	6397	biological process	0.1145	0.97768	4.99882	0.81206	0.11908	1	1	5	21125	0	0
mRNA processing	6397	6396 RNA processing	0.1926	0.88469	4.21875	0.31398	0.35007	1	1	5	27	0	0
tRNA metabolism	6399	biological process	0.50102	0.07854	39.9243	0.93992	0.25327	0.68442	1	40	21090	3	1
tRNA metabolism	6399	16070 RNA metabolism	0.98929	0.03423	14.6032	0.00011	0.03461	0.00378	1	40	23	3	1
RNA catabolism	6401	biological process	0.05766	0.89375	2.99957	0.73579	0.12158	1	1	3	21127	0	0
RNA catabolism	6401	16070 RNA metabolism	0.1663	0.69028	2.625	0.11604	0.43211	1	1	3	21	0	0
RNA localization	6403	biological process	0.84045	0.23281	2.99957	0.73579	0.47981	1	1	3	21127	0	0
RNA localization	6403	51179 localization	0.79434	0.30345	2.95928	0.73914	0.56989	1	1	3	218	0	0
protein biosynthesis	6412	biological process	0.42292	0.39172	66.7875	0.95391	0.81511	0.8553	1	67	21063	1	1
translational initiation	6413	biological process	0.31605	0.81849	3.99924	0.78329	0.41356	1	1	4	21126	0	0
regulation of protein biosynthesis	6417	biological process	0.49674	0.66788	7.99697	0.85783	0.86111	1	1	8	21122	0	0
regulation of protein biosynthesis	6417	6412 protein biosynthesis	0.30594	0.5332	7.04478	0.3928	0.89998	1	1	8	59	0	0
tRNA aminoacylation for protein translation	6418	biological process	0.35303	0.19875	36.9352	0.93745	0.49575	0.65588	1	37	21093	3	1
glutamyl-tRNA aminoacylation	6424	biological process	0.25236	0.88094	3.99924	0.78329	0.39395	0.10884	1	4	21126	25	1
glutamyl-tRNA aminoacylation	6424	6418 tRNA aminoacylation for protein translation	0.18137	0.9956	3.56757	0.00122	0.30432	NaN	1	4	33	25	1
glutaminyl-tRNA aminoacylation	6425	biological process	0.25236	0.88094	3.99924	0.78329	0.39395	0.10884	1	4	21126	25	1
glutaminyl-tRNA aminoacylation	6425	6418 tRNA aminoacylation for protein translation	0.18137	0.9956	3.56757	0.00122	0.30432	NaN	1	4	33	25	1
isoleucyl-tRNA aminoacylation	6428	biological process	0.53354	0.03436	21.9771	0.91801	0.14065	1	1	22	21108	0	0
isoleucyl-tRNA aminoacylation	6428	6418 tRNA aminoacylation for protein translation	0.96506	0.04882	8.91892	0.00825	0.09481	1	1	22	15	0	0
threonyl-tRNA aminoacylation	6435	biological process	0.2293	0.58107	7.99697	0.85783	0.83149	1	1	8	21122	0	0
threonyl-tRNA aminoacylation	6435	6418 tRNA aminoacylation for protein translation	0.11188	0.8899	6.27027	0.56568	0.40645	1	1	8	29	0	0
regulation of translation	6445	biological process	0.37268	0.80741	3.99924	0.78329	0.62877	1	1	4	21126	0	0
regulation of translation	6445	6417 regulation of protein biosynthesis	0.27273	0.72266	2	0.49582	0.68571	1	1	4	4	0	0
protein folding	6457	biological process	0.42792	0.99758	4.99882	0.81206	0.29287	0.13415	1	5	21125	20	1
protein folding	6457	6445 regulation of translation	0.40332	0.79692	2.22222	0.19361	0.73016	NaN	1	5	4	20	1
protein complex assembly	6461	biological process	0.01867	0.90497	22.975	0.9199	0.01984	1	1	23	21107	0	0
protein complex assembly	6461	19538 protein metabolism	0.08989	0.9182	18.9924	0.60389	0.06684	1	1	23	109	0	0
protein complex assembly	6461	6445 regulation of translation	0.32606	0.82695	3.40741	0.81372	0.56176	1	1	23	4	0	0
protein modification	6464	biological process	0.15851	0.8483	109.427	0.96425	0.36537	0.1996	0.79595	110	21020	6	7
protein amino acid phosphorylation	6468	biological process	0.58791	0.81187	57.8408	0.95037	0.92204	0.22589	0.46083	58	21072	9	5
protein amino acid phosphorylation	6468	6464 protein modification	0.79493	0.22553	27.4182	0.09841	0.39856	NaN	NaN	58	52	9	5
protein amino acid dephosphorylation	6470	biological process	0.17674	0.5052	12.992	0.89145	0.98786	1	1	13	21117	0	0
protein amino acid dephosphorylation	6470	6464 protein modification	0.40069	0.4764	11.4636	0.0038	0.71801	1	1	13	97	0	0
proteolysis	6508	biological process	0.02479	0.34456	62.8122	0.95243	0.48713	0.5367	1	63	21067	3	2
ubiquitin-dependent protein catabolism	6511	biological process	0.22614	0.73484	24.9704	0.92332	0.64576	0.51353	1	25	21105	4	1
ubiquitin cycle	6512	biological process	0.01959	0.74694	6.99768	0.84644	0.0637	1	1	7	21123	0	0
ubiquitin cycle	6512	6464 protein modification	0.01625	0.81766	6.55455	0.01858	0.06445	1	1	7	103	0	0
amino acid and derivative metabolism	6519	biological process	0.4851	0.06452	118.33	NaN	NaN	0.4347	1	119	21011	3	4
amino acid and derivative metabolism	6519	44237 cellular metabolism	0.78064	0.09022	66.5519	NaN	NaN	0	1	119	151	3	4
amino acid and derivative metabolism	6519	44238 primary metabolism	0.96142	0.01277	45.6269	1.01322	0.14419	NaN	1	119	74	3	4
amino acid metabolism	6520	biological process	0.47438	0.68953	50.8769	0.94699	0.82549	0.1749	1	51	21079	6	3
amino acid metabolism	6520	6519 amino acid and derivative metabolism	0.19102	0.98651	29.1429	0.98976	0.19747	NaN	1	51	68	6	3
amino acid metabolism	6520	19752 carboxylic acid metabolism	0.0812	0.98119	5.36842	0.04682	0.1722	NaN	1	51	6	6	3
arginine metabolism	6525	biological process	0.02159	0.99211	7.99697	0.85783	0.05135	0.20586	1	8	21122	13	1
arginine metabolism	6525	19752 carboxylic acid metabolism	0.00965	0.87905	3.42857	0.01646	0.05927	NaN	1	8	6	13	1
arginine catabolism	6527	biological process	0.02159	0.99211	7.99697	0.85783	0.05135	0.20586	1	8	21122	13	1
arginine catabolism	6527	19752 carboxylic acid metabolism	0.00965	0.87905	3.42857	0.01646	0.05927	NaN	1	8	6	13	1
cysteine metabolism	6534	biological process	0.08467	0.99042	2.99957	0.73579	0.17787	0.08279	1	3	21127	33	1
amino acid derivative metabolism	6575	biological process	0.76948	0.03949	72.7478	NaN	NaN	0.87834	1	73	21057	1	1
amino acid derivative metabolism	6575	6519 amino acid and derivative metabolism	0.85253	0.22746	28.2185	1.01654	0.41771	0.01033	1	73	46	1	1
biogenic amine metabolism	6576	biological process	0.76948	0.03949	72.7478	NaN	NaN	0.87834	1	73	21057	1	1
biogenic amine metabolism	6576	9308 amine metabolism	0.81998	0.05887	5.5443	1.15187	0.27897	NaN	1	73	6	1	1
catecholamine metabolism	6584	biological process	0.96588	0.02234	15.9879	0.90294	0.04835	1	1	16	21114	0	0
catecholamine metabolism	6584	6576 biogenic amine metabolism	0.92526	0.1842	12.4931	0.93659	0.10518	1	1	16	57	0	0
polyamine metabolism	6595	biological process	0.68165	0.2247	51.872	NaN	NaN	0.77682	1	52	21078	2	1
polyamine metabolism	6595	6576 biogenic amine metabolism	0.17652	0.99098	14.9589	1.04351	0.1453	NaN	1	52	21	2	1
polyamine biosynthesis	6596	biological process	0.68165	0.2247	51.872	NaN	NaN	0.77682	1	52	21078	2	1
spermine biosynthesis	6597	biological process	0.75124	0.09124	43.9084	NaN	NaN	1	1	44	21086	0	0
spermine biosynthesis	6597	6596 polyamine biosynthesis	0.9546	0.01165	6.76923	1.11099	0.03418	1	1	44	8	0	0
protein targeting	6605	biological process	0.07245	0.69916	9.99527	0.87463	0.35844	1	1	10	21120	0	0
protein targeting	6605	6886 intracellular protein transport	0.00345	1	5	0.23239	0.02575	1	1	10	10	0	0
protein targeting	6605	19752 carboxylic acid metabolism	0.0278	1	3.75	0.48504	0.02473	1	1	10	6	0	0
protein import into nucleus	6606	biological process	0.06645	0.65683	5.9983	0.83182	0.39043	1	1	6	21124	0	0
protein import into nucleus	6606	6605 protein targeting	0.68486	0.68486	2.4	0.04071	1	1	1	6	4	0	0
lipid metabolism	6629	biological process	0.85675	0.33755	54.8568	NaN	NaN	0.46464	0.43376	55	21075	7	4
lipid metabolism	6629	44238 primary metabolism	0.92615	0.18465	26.729	1.0021	0.20575	NaN	NaN	55	52	7	4
fatty acid metabolism	6631	biological process	0.70418	0.36876	24.9704	NaN	NaN	0.51353	0.49235	25	21105	8	2
fatty acid biosynthesis	6633	biological process	0.96993	0.09656	7.99697	0.85783	0.10695	1	0.19496	8	21122	13	1
fatty acid biosynthesis	6633	6631 fatty acid metabolism	1	0.09548	5.44	0.93255	0.05832	1	NaN	8	17	13	1
fatty acid biosynthesis	6633	8610 lipid biosynthesis	0.59712	0.23875	3.42857	0.00648	0.57276	1	NaN	8	6	13	1
membrane lipid metabolism	6643	biological process	0.8809	0.07878	7.99697	0.85783	0.11702	1	1	8	21122	0	0
phospholipid metabolism	6644	biological process	0.8809	0.07878	7.99697	0.85783	0.11702	1	1	8	21122	0	0
icosanoid metabolism	6690	biological process	0.19403	0.9966	11.9932	NaN	NaN	0.29233	1	12	21118	8	1
icosanoid metabolism	6690	6631 fatty acid metabolism	0.01149	1	6.24	0.99309	NaN	NaN	1	12	13	8	1
leukotriene metabolism	6691	biological process	0.08202	0.99719	9.99527	NaN	NaN	0.25033	1	10	21120	10	1
steroid biosynthesis	6694	biological process	0.69476	0.38973	6.99768	0.84644	0.63716	1	1	7	21123	0	0
steroid biosynthesis	6694	8202 steroid metabolism	1	0.0259	2.91667	0.04907	0.04545	1	1	7	5	0	0
steroid biosynthesis	6694	8610 lipid biosynthesis	0.12642	0.87022	3.73333	0.00457	0.4634	1	1	7	8	0	0
cholesterol biosynthesis	6695	biological process	0.36566	0.30235	4.99882	0.81206	0.94085	1	1	5	21125	0	0
cholesterol biosynthesis	6695	8203 cholesterol metabolism	1	0.02646	2.22222	0.03186	0.07937	1	1	5	4	0	0
isoprenoid metabolism	6720	biological process	0.23332	0.22848	2.99957	0.73579	0.93881	1	1	3	21127	0	0
aromatic compound metabolism	6725	biological process	0.95591	0.01937	20.9791	0.91598	0.07502	1	1	21	21109	0	0
aromatic compound metabolism	6725	44237 cellular metabolism	0.99584	0.04903	18.48	0.93111	0.06626	1	1	21	154	0	0
coenzyme metabolism	6732	biological process	0.46144	0.63657	13.9907	0.89572	0.83358	0.33197	1	14	21116	7	1
group transfer coenzyme metabolism	6752	biological process	0.51328	0.50825	9.99527	0.87463	0.92502	1	1	10	21120	0	0
group transfer coenzyme metabolism	6752	6732 coenzyme metabolism	0.64427	0.64427	2.85714	0.01305	1	1	1	10	4	0	0
nucleoside phosphate metabolism	6753	biological process	0.63155	0.54179	8.99617	0.86701	0.93757	1	1	9	21121	0	0
ATP biosynthesis	6754	biological process	0.63155	0.54179	8.99617	0.86701	0.93757	1	1	9	21121	0	0
ATP biosynthesis	6754	9108 coenzyme biosynthesis	0.32213	0.52877	2.25	0.26379	0.98182	1	1	9	3	0	0
vitamin metabolism	6766	biological process	0.85586	0.06437	3.99924	0.78329	0.16951	1	1	4	21126	0	0
vitamin metabolism	6766	44237 cellular metabolism	0.96811	0.05942	3.89809	0.78928	0.09254	1	1	4	153	0	0
vitamin metabolism	6766	19752 carboxylic acid metabolism	0.84515	0.5102	2.4	0.96032	0.7619	1	1	4	6	0	0
water-soluble vitamin metabolism	6767	biological process	0.63772	0.11913	2.99957	0.73579	0.40049	1	1	3	21127	0	0
water-soluble vitamin metabolism	6767	19752 carboxylic acid metabolism	0.56133	0.56133	2	0.54896	1	1	1	3	6	0	0
sulfur metabolism	6790	biological process	0.35687	0.71115	3.99924	0.78329	0.68629	0.10884	1	4	21126	25	1
sulfur metabolism	6790	44237 cellular metabolism	0.2431	0.61104	3.90062	0.78913	0.56855	0.00095	1	4	157	25	1
phosphorus metabolism	6793	biological process	0.78775	0.11145	101.508	0.96284	0.29738	0.78913	0.7603	102	21028	4	4
phosphorus metabolism	6793	44237 cellular metabolism	0.93605	0.16978	55.9646	0.99503	0.19107	0.00023	NaN	102	124	4	4
phosphate metabolism	6796	biological process	0.78775	0.11145	101.508	0.96284	0.29738	0.78913	0.7603	102	21028	4	4
oxygen and reactive oxygen species metabolism	6800	biological process	0.44248	0.33868	15.9879	0.90294	0.98448	0.36939	1	16	21114	6	1
oxygen and reactive oxygen species metabolism	6800	44237 cellular metabolism	0.62724	0.81159	14.4198	0.91694	0.89726	0.00303	1	16	146	6	1
superoxide metabolism	6801	biological process	0.40922	0.40603	9.99527	0.87463	0.99125	1	1	10	21120	0	0
superoxide metabolism	6801	6800 oxygen and reactive oxygen species metabolism	0.6149	0.69958	3.75	0.00692	0.93756	1	1	10	6	0	0
glutathione conjugation reaction	6803	biological process	0.05225	0.99623	2.99957	0.73579	0.04821	0.08279	1	3	21127	33	1
glutathione conjugation reaction	6803	8371 obsolete biological process	0.08225	0.99658	2.8125	0.57176	0.09666	0.00028	1	3	45	33	1
peroxidase reaction	6804	biological process	0.54161	0.64303	2.99957	0.73579	0.78512	1	1	3	21127	0	0
peroxidase reaction	6804	8371 obsolete biological process	0.61053	0.46256	2.8125	0.25027	0.93211	1	1	3	45	0	0
xenobiotic metabolism	6805	biological process	0.95162	0.0859	4.99882	0.81206	0.14204	1	1	5	21125	0	0
xenobiotic metabolism	6805	44237 cellular metabolism	0.94369	0.05676	4.84568	0.81886	0.1017	1	1	5	157	0	0
nitrogen compound metabolism	6807	biological process	0.71556	0.23501	84.6581	NaN	NaN	0.69864	1	85	21045	2	2
nitrogen compound metabolism	6807	8152 metabolism	0.59076	0.18742	74.8096	NaN	NaN	0.00162	1	85	624	2	2
nitrogen compound metabolism	6807	44237 cellular metabolism	0.34276	0.11932	54.7699	NaN	NaN	0.00016	1	85	154	2	2
transport	6810	biological process	0.15842	0.01994	312.244	NaN	NaN	0.66878	1	317	20813	3	8
transport	6810	50875 cellular physiological process	0.63799	0.2174	101.82	NaN	NaN	NaN	1	317	150	3	8
transport	6810	51234 establishment of localization	0.05184	0.65522	12.4879	1.10267	0.22002	NaN	1	317	13	3	8
ion transport	6811	biological process	0.71512	0.13992	70.7614	0.95526	0.16033	1	1	71	21059	0	0
ion transport	6811	6810 transport	0.89586	0.45581	55.0978	0.97165	0.36757	1	1	71	246	0	0
ion transport	6811	51234 establishment of localization	0.93441	0.46825	49.8193	0.97817	0.37015	1	1	71	167	0	0
cation transport	6812	biological process	0.87516	0.19633	42.9125	0.94212	0.28875	1	1	43	21087	0	0
cation transport	6812	6811 ion transport	0.6201	0.50084	16.9578	0.06418	0.99531	1	1	43	28	0	0
cation transport	6812	51234 establishment of localization	0.88559	0.43983	34.5954	0.96024	0.49749	1	1	43	177	0	0
potassium ion transport	6813	biological process	0.77514	0.21383	8.99617	0.86701	0.40893	1	1	9	21121	0	0
potassium ion transport	6813	15672 monovalent inorganic cation transport	0.52877	0.17034	2.25	0.17649	0.6	1	1	9	3	0	0
sodium ion transport	6814	biological process	0.48251	0.55104	5.9983	0.83182	0.98134	1	1	6	21124	0	0
sodium ion transport	6814	15672 monovalent inorganic cation transport	0.15966	0.81558	3	0.1255	0.39394	1	1	6	6	0	0
calcium ion transport	6816	biological process	0.36608	0.41498	3.99924	0.78329	0.85627	1	1	4	21126	0	0
hydrogen transport	6818	biological process	0.88875	0.29723	26.9655	0.92634	0.32242	1	1	27	21103	0	0
hydrogen transport	6818	6810 transport	0.89408	0.47598	24.7003	0.93563	0.50033	1	1	27	290	0	0
anion transport	6820	biological process	0.86925	0.24595	30.9545	0.93145	0.21161	1	1	31	21099	0	0
anion transport	6820	6811 ion transport	0.80282	0.49495	17.4648	0.53319	0.62627	1	1	31	40	0	0
chloride transport	6821	biological process	0.95098	0.14163	11.9932	0.88661	0.24704	1	1	12	21118	0	0
chloride transport	6821	15698 inorganic anion transport	0.58063	0.44392	6.85714	0.12035	0.62589	1	1	12	16	0	0
small molecule transport	6832	biological process	0.20696	0.65771	3.99924	0.78329	0.72701	1	1	4	21126	0	0
small molecule transport	6832	8371 obsolete biological process	0.31419	0.46566	3.66667	0.73605	0.92569	1	1	4	44	0	0
lipid transport	6869	biological process	0.67882	0.51537	2.99957	0.73579	0.77545	1	1	3	21127	0	0
lipid transport	6869	6810 transport	0.54575	0.60489	2.97161	0.7381	0.91934	1	1	3	314	0	0
cell ion homeostasis	6873	biological process	0.56715	0.41991	8.99617	0.86701	0.60694	1	0.02261	9	21121	22	2
calcium ion homeostasis	6874	biological process	0.99829	0.09282	3.99924	0.78329	0.06601	1	0.00412	4	21126	50	2
metal ion homeostasis	6875	biological process	0.79374	0.31115	6.99768	0.84644	0.46502	1	0.01366	7	21123	29	2
intracellular protein transport	6886	biological process	0.92468	0.26073	19.9811	0.91379	0.46728	1	1	20	21110	0	0
endocytosis	6897	biological process	0.65668	0.53989	5.9983	0.83182	0.72784	1	1	6	21124	0	0
endocytosis	6897	16192 vesicle-mediated transport	0.84515	0.5102	2.4	0.79777	0.7619	1	1	6	4	0	0
phagocytosis	6909	biological process	0.65668	0.53989	5.9983	0.83182	0.72784	1	1	6	21124	0	0
phagocytosis	6909	16192 vesicle-mediated transport	0.84515	0.5102	2.4	0.79777	0.7619	1	1	6	4	0	0
phagocytosis\, engulfment	6911	biological process	0.51907	0.11244	2.99957	0.73579	0.40831	1	1	3	21127	0	0
phagocytosis\, engulfment	6911	16192 vesicle-mediated transport	0.64286	0.17079	2.1	0.10188	0.51667	1	1	3	7	0	0
nucleocytoplasmic transport	6913	biological process	0.029	0.48088	7.99697	0.85783	0.46171	1	1	8	21122	0	0
nucleocytoplasmic transport	6913	16192 vesicle-mediated transport	0.07427	0.65968	4.44444	0.04248	0.45976	1	1	8	10	0	0
apoptosis	6915	biological process	0.05881	0.87605	79.6971	0.95791	0.23511	0.19018	0.88609	80	21050	6	5
apoptosis	6915	16192 vesicle-mediated transport	0.3834	0.57561	8.08989	0.09003	0.95117	NaN	NaN	80	9	6	5
anti-apoptosis	6916	biological process	0.18055	0.85132	16.9863	0.90603	0.16671	1	1	17	21113	0	0
anti-apoptosis	6916	16192 vesicle-mediated transport	0.26261	0.95175	6.2963	0.87277	0.28036	1	1	17	10	0	0
induction of apoptosis	6917	biological process	0.16721	0.99276	30.9545	0.93145	0.22449	0.05644	1	31	21099	10	3
cell motility	6928	biological process	0.57534	0.0351	17.9847	0.90884	0.20125	1	0.38618	18	21112	6	1
cell motility	6928	50875 cellular physiological process	0.63568	0.0974	17.1219	0.91514	0.26062	1	0.0017	18	351	6	1
cell motility	6928	51234 establishment of localization	0.5485	0.12122	16.4498	0.92028	0.35367	1	NaN	18	191	6	1
chemotaxis	6935	biological process	0.99677	0.01557	7.99697	0.85783	0.00595	1	0.0179	8	21122	25	2
chemotaxis	6935	42221 response to chemical stimulus	1	0.04625	4.23529	0.71145	0.05701	1	NaN	8	9	25	2
chemotaxis	6935	51234 establishment of localization	0.99958	0.01202	7.69811	0.86481	0.00785	1	NaN	8	204	25	2
muscle contraction	6936	biological process	0.12756	0.81282	21.9771	0.91801	0.25824	0.46957	0.4493	22	21108	9	2
muscle contraction	6936	50874 organismal physiological process	0.09435	0.90255	20.1597	0.92808	0.11724	0.00933	0.00727	22	241	9	2
muscle contraction	6936	42330 taxis	0.01687	1	5.31034	0.84979	0.01005	NaN	0.00208	22	7	9	2
muscle contraction	6936	51234 establishment of localization	0.05726	0.62601	19.7696	0.93036	0.09903	0.00416	0.00104	22	195	9	2
regulation of muscle contraction	6937	biological process	0.40149	0.94782	2.99957	0.73579	0.41313	0.08279	1	3	21127	33	1
regulation of muscle contraction	6937	6936 muscle contraction	0.48754	0.88042	2.59091	0.0385	0.63239	NaN	1	3	19	33	1
regulation of muscle contraction	6937	51234 establishment of localization	0.3431	0.98786	2.95652	0.73937	0.32917	0.00057	1	3	204	33	1
striated muscle contraction	6941	biological process	0.30833	0.76369	3.99924	0.78329	0.65007	0.10884	1	4	21126	25	1
striated muscle contraction	6941	6936 muscle contraction	0.54278	0.6096	3.27273	0.06649	0.96605	NaN	1	4	18	25	1
striated muscle contraction	6941	51234 establishment of localization	0.25342	0.86602	3.92308	0.78778	0.52106	0.00076	1	4	204	25	1
regulation of striated muscle contraction	6942	biological process	0.40149	0.94782	2.99957	0.73579	0.41313	0.08279	1	3	21127	33	1
regulation of striated muscle contraction	6942	51234 establishment of localization	0.3431	0.98786	2.95652	0.73937	0.32917	0.00057	1	3	204	33	1
response to stress	6950	biological process	0.97294	0.00858	102.498	0.96302	0.00148	0.79362	0.01959	103	21027	9	9
response to stress	6950	50896 response to stimulus	0.83165	0.24845	64.4218	0.98809	0.23135	0.00023	NaN	103	172	9	9
response to stress	6950	51234 establishment of localization	0.98865	0.00235	67.9868	0.98522	0.02	0.00014	NaN	103	200	9	9
defense response	6952	biological process	0.96481	2e-05	187.309	NaN	NaN	0.61962	0.01155	189	20941	8	16
defense response	6952	9607 response to biotic stimulus	0.9846	0.01711	6.75	1.14659	0.03662	NaN	NaN	189	7	8	16
defense response	6952	51234 establishment of localization	0.97372	0.00025	96.6977	NaN	NaN	NaN	NaN	189	198	8	16
inflammatory response	6954	biological process	0.96008	0.00158	26.9655	0.92634	0.00028	0.5408	0.03425	27	21103	15	4
inflammatory response	6954	6955 immune response	0.95524	0.05808	23.038	0.94299	0.03301	0.0051	0	27	157	15	4
inflammatory response	6954	9611 response to wounding	0.96806	0.00627	10.8	0.00037	0.00543	NaN	NaN	27	18	15	4
inflammatory response	6954	9613 response to pest\, pathogen or parasite	0.97931	0.00023	6.75	0.09708	0.00088	NaN	NaN	27	9	15	4
immune response	6955	biological process	0.93406	2e-05	182.398	NaN	NaN	0.59592	0.02415	184	20946	8	15
immune response	6955	6952 defense response	0.34478	0.83924	4.86772	1.18214	0.61035	NaN	NaN	184	5	8	15
immune response	6955	50874 organismal physiological process	0.99055	7e-05	72.264	1.0096	0.00018	0	NaN	184	119	8	15
immune response	6955	9613 response to pest\, pathogen or parasite	0.98377	0.01674	6.74346	1.1464	0.03758	NaN	NaN	184	7	8	15
complement activation	6956	biological process	0.19187	0.61783	11.9932	0.88661	0.45481	1	1	12	21118	0	0
complement activation	6956	6959 humoral immune response	0.01507	0.97351	6.85714	0.28233	0.01898	1	1	12	16	0	0
complement activation	6956	50874 organismal physiological process	0.13524	0.74173	11.4744	0.89343	0.30122	1	1	12	262	0	0
complement activation	6956	9613 response to pest\, pathogen or parasite	0.92087	0.16608	5.14286	0.5733	0.2408	1	1	12	9	0	0
complement activation\, classical pathway	6958	biological process	0.08566	0.70476	10.9943	0.88107	0.22056	1	1	11	21119	0	0
complement activation\, classical pathway	6958	9613 response to pest\, pathogen or parasite	0.9096	0.2016	4.95	0.77799	0.36175	1	1	11	9	0	0
humoral immune response	6959	biological process	0.98934	0.00968	27.9629	0.92773	0.06342	1	0.17112	28	21102	7	2
humoral immune response	6959	6955 immune response	0.38029	0.15428	23.7391	0.94474	0.63139	1	5e-05	28	156	7	2
humoral immune response	6959	9613 response to pest\, pathogen or parasite	0.98059	0.0228	6.81081	0.13111	0.01853	1	NaN	28	9	7	2
humoral immune response	6959	9613 response to pest\, pathogen or parasite	0.98059	0.0228	6.81081	0.13111	0.01853	1	NaN	28	9	7	2
cellular defense response	6968	biological process	0.9699	0.03112	6.99768	0.84644	0.12078	1	0.01366	7	21123	29	2
cellular defense response	6968	6955 immune response	0.83315	0.1136	6.7337	0.85388	0.30934	1	0	7	177	29	2
cellular defense response	6968	9611 response to wounding	0.78577	0.0416	5.11538	0.10751	0.24762	1	NaN	7	19	29	2
cellular defense response	6968	9613 response to pest\, pathogen or parasite	1	0.02563	4.11765	0.06749	0.04309	1	NaN	7	10	29	2
response to DNA damage stimulus	6974	biological process	0.82877	0.42101	9.99527	0.87463	0.50621	1	0.23745	10	21120	10	1
response to DNA damage stimulus	6974	6950 response to stress	0.48081	0.81882	9.02913	0.5062	0.72568	1	0.00284	10	93	10	1
response to DNA damage stimulus	6974	9613 response to pest\, pathogen or parasite	1	0.01552	5	0.0725	0.03764	1	NaN	10	10	10	1
response to oxidative stress	6979	biological process	0.49888	0.43965	5.9983	0.83182	0.96335	0.15874	1	6	21124	17	1
response to oxidative stress	6979	6800 oxygen and reactive oxygen species metabolism	0.69958	0.6149	3.75	0.00692	0.93756	NaN	1	6	10	17	1
response to oxidative stress	6979	6950 response to stress	0.18556	0.87551	5.65049	0.20542	0.43867	0.00028	1	6	97	17	1
response to oxidative stress	6979	42221 response to chemical stimulus	0.1117	0.90425	4.28571	0.51045	0.22741	NaN	1	6	15	17	1
organelle organization and biogenesis	6996	biological process	0.2429	0.24073	64.8	0.95319	0.57729	0.84669	1	65	21065	2	1
organelle organization and biogenesis	6996	16043 cell organization and biogenesis	0.70979	0.09734	16.9886	0.02709	0.2333	NaN	1	65	23	2	1
chromosome organization and biogenesis (sensu Eukaryota)	7001	biological process	0.56151	0.25068	18.9829	0.91142	0.54168	1	1	19	21111	0	0
cytoskeleton organization and biogenesis	7010	biological process	0.30539	0.7479	31.9515	0.93257	0.84457	0.60248	1	32	21098	3	1
cytoskeleton organization and biogenesis	7010	6996 organelle organization and biogenesis	0.57478	0.9558	16.2462	0.06131	0.45842	NaN	1	32	33	3	1
microtubule-based process	7017	biological process	0.59836	0.70961	7.99697	0.85783	0.91905	1	1	8	21122	0	0
microtubule-based process	7017	7010 cytoskeleton organization and biogenesis	0.68405	0.42555	6	0.49942	0.84474	1	1	8	24	0	0
cytoplasm organization and biogenesis	7028	biological process	0.03158	0.91646	19.9811	0.91379	0.05953	1	1	20	21110	0	0
cytoplasm organization and biogenesis	7028	16043 cell organization and biogenesis	0.04398	0.96257	14.8718	0.34472	0.03941	1	1	20	58	0	0
intercellular junction assembly	7043	biological process	2e-05	0.96828	6.99768	0.84644	0.00016	1	1	7	21123	0	0
intercellular junction assembly	7043	6461 protein complex assembly	5e-05	1	4.86957	0.33803	0.00074	1	1	7	16	0	0
ribosome biogenesis	7046	biological process	0.45742	0.36043	12.992	0.89145	0.66312	1	1	13	21117	0	0
oncogenesis	7048	biological process	0.08565	0.92787	11.9932	0.88661	0.20808	1	1	12	21118	0	0
oncogenesis	7048	8371 obsolete biological process	0.28778	0.57488	9	0.23596	0.39793	1	1	12	36	0	0
cell cycle	7049	biological process	0.33093	0.87561	59.8296	NaN	NaN	0.24097	0.80378	60	21070	7	4
cell cycle	7049	50875 cellular physiological process	0.16987	0.64623	50.4509	NaN	NaN	0	0.00567	60	317	7	4
mitosis	7067	biological process	0.97287	0.20436	11.9932	NaN	NaN	1	0.27771	12	21118	8	1
invasive growth	7125	biological process	0.00875	0.5893	3.99924	0.78329	0.12226	0.10884	0.10275	4	21126	50	2
invasive growth	7125	8371 obsolete biological process	0.01707	0.57856	3.66667	0.005	0.1733	0.00038	0.00019	4	44	50	2
meiosis	7126	biological process	0.68657	0.08239	3.99924	0.78329	0.3989	1	1	4	21126	0	0
cell communication	7154	biological process	0.39242	0.07675	375.094	NaN	NaN	0.62878	0.94149	382	20748	4	16
cell communication	7154	9987 cellular process	0.35833	0.38684	256.528	NaN	NaN	0	0	382	781	4	16
cell adhesion	7155	biological process	0.92401	0.03755	79.6971	0.95791	0.02947	0.39554	0.16404	80	21050	9	7
cell adhesion	7155	9987 cellular process	0.90258	0.05325	74.497	0.96212	0.09456	0.00018	0	80	1083	9	7
homophilic cell adhesion	7156	biological process	0.68657	0.49174	3.99924	0.78329	0.71367	1	1	4	21126	0	0
homophilic cell adhesion	7156	16337 cell-cell adhesion	0.64427	0.85362	2.85714	0.98798	0.94505	1	1	4	10	0	0
heterophilic cell adhesion	7157	biological process	0.99817	0.2858	7.99697	0.85783	0.24776	1	0.19496	8	21122	13	1
heterophilic cell adhesion	7157	16337 cell-cell adhesion	0.87905	0.69901	3.42857	0.43994	0.85181	1	NaN	8	6	13	1
cell-matrix adhesion	7160	biological process	0.27039	0.90798	15.9879	0.90294	0.38021	1	1	16	21114	0	0
signal transduction	7165	biological process	0.6772	0.2825	276.29	NaN	NaN	0.67559	0.8682	280	20850	4	12
signal transduction	7165	7154 cell communication	0.2104	0.46966	74.7644	NaN	NaN	NaN	NaN	280	102	4	12
cell surface receptor linked signal transduction	7166	biological process	0.8236	0.21776	147.949	NaN	NaN	0.79716	0.56249	149	20981	5	7
cell surface receptor linked signal transduction	7166	7165 signal transduction	0.33404	0.15768	69.7107	1.00293	0.58215	0	NaN	149	131	5	7
enzyme linked receptor protein signaling pathway	7167	biological process	0.75406	0.24626	24.9704	0.92332	0.32034	0.51353	0.49235	25	21105	8	2
enzyme linked receptor protein signaling pathway	7167	7166 cell surface receptor linked signal transduction	0.75696	0.40269	20.8054	0.94335	0.52211	0.00236	0.00355	25	124	8	2
transmembrane receptor protein tyrosine kinase signaling pathway	7169	biological process	0.68815	0.15666	21.9771	0.91801	0.24392	0.46957	0.4493	22	21108	9	2
transmembrane receptor protein tyrosine kinase signaling pathway	7169	7167 enzyme linked receptor protein signaling pathway	0.71221	0.10084	2.64	0.10169	0.37991	NaN	NaN	22	3	9	2
G-protein coupled receptor protein signaling pathway	7186	biological process	0.86053	0.14973	98.5362	NaN	NaN	0.77512	0.26992	99	21031	6	6
G-protein coupled receptor protein signaling pathway	7186	7166 cell surface receptor linked signal transduction	0.9656	0.14987	33.2215	1.02198	0.26116	NaN	NaN	99	50	6	6
G-protein signaling\, coupled to cyclic nucleotide second messenger	7187	biological process	0.9614	0.08115	55.8516	NaN	NaN	1	0.44287	56	21074	4	2
G-protein signaling\, coupled to cyclic nucleotide second messenger	7187	7186 G-protein coupled receptor protein signaling pathway	0.52389	0.22014	24.3232	1.01036	0.91567	1	1e-05	56	43	4	2
G-protein signaling\, coupled to cAMP nucleotide second messenger	7188	biological process	0.89794	0.0683	44.9042	NaN	NaN	1	1	45	21085	0	0
G-protein signaling\, coupled to cAMP nucleotide second messenger	7188	7187 G-protein signaling\, coupled to cyclic nucleotide second messenger	0.52463	0.07575	8.83929	1.08341	0.4454	1	1	45	11	0	0
G-protein signaling\, adenylate cyclase activating pathway	7189	biological process	0.16102	0.38352	2.99957	0.73579	0.7849	1	1	3	21127	0	0
G-protein signaling\, adenylate cyclase activating pathway	7189	7188 G-protein signaling\, coupled to cAMP nucleotide second messenger	0.07681	0.60845	2.8	0.75335	0.45277	1	1	3	42	0	0
G-protein signaling\, adenylate cyclase inhibiting pathway	7193	biological process	0.91149	0.03138	40.9204	NaN	NaN	1	1	41	21089	0	0
G-protein signaling\, adenylate cyclase inhibiting pathway	7193	7188 G-protein signaling\, coupled to cAMP nucleotide second messenger	0.70635	0.03354	3.64444	1.19441	0.24742	1	1	41	4	0	0
G-protein signaling\, coupled to IP3 second messenger (phospholipase C activating)	7200	biological process	0.73197	0.15216	5.9983	0.83182	0.35617	0.15874	0.1501	6	21124	33	2
G-protein signaling\, coupled to IP3 second messenger (phospholipase C activating)	7200	7186 G-protein coupled receptor protein signaling pathway	0.73117	0.32025	5.63636	0.84467	0.56241	0.00028	0.00085	6	93	33	2
protein kinase C activation	7205	biological process	0.6747	0.05262	4.99882	0.81206	0.2086	0.13415	0.12675	5	21125	40	2
neuropeptide signaling pathway	7218	biological process	0.8899	0.16083	45.8999	NaN	NaN	1	0.71295	46	21084	2	1
neuropeptide signaling pathway	7218	7186 G-protein coupled receptor protein signaling pathway	0.59866	0.34238	24.6263	0.99446	NaN	1	0.00652	46	53	2	1
frizzled-2 signaling pathway	7223	biological process	0.37636	0.69305	2.99957	0.73579	0.62143	1	1	3	21127	0	0
integrin-mediated signaling pathway	7229	biological process	0.06873	0.92927	11.9932	0.88661	0.12663	1	1	12	21118	0	0
integrin-mediated signaling pathway	7229	7166 cell surface receptor linked signal transduction	0.056	0.91988	11.0336	0.89951	0.06604	1	1	12	137	0	0
intracellular signaling cascade	7242	biological process	0.71364	0.19916	132.163	NaN	NaN	0.32185	0.69183	133	20997	6	8
intracellular signaling cascade	7242	7165 signal transduction	0.45951	0.37582	69.825	0.99772	NaN	NaN	NaN	133	147	6	8
protein kinase cascade	7243	biological process	0.57074	0.59193	4.99882	0.81206	0.87869	1	1	5	21125	0	0
protein kinase cascade	7243	7242 intracellular signaling cascade	0.46604	0.6261	4.81203	0.82041	0.75392	1	1	5	128	0	0
small GTPase mediated signal transduction	7264	biological process	0.00389	0.98134	18.9829	0.91142	0.0063	0.42164	1	19	21111	5	1
small GTPase mediated signal transduction	7264	7242 intracellular signaling cascade	0.00055	0.97567	16.2857	0.93061	0.00241	0.00359	1	19	114	5	1
cell-cell signaling	7267	biological process	0.54169	0.60596	65.7939	0.95355	0.8688	0.85106	0.2573	66	21064	6	4
cell-cell signaling	7267	7154 cell communication	0.54248	0.83483	54.5969	0.96626	0.77661	0.02777	0	66	316	6	4
synaptic transmission	7268	biological process	0.48633	0.51888	23.9727	0.92167	0.80791	1	0.47839	24	21106	4	1
nerve-nerve synaptic transmission	7270	biological process	0.74042	0.09186	2.99957	0.73579	0.19821	1	1	3	21127	0	0
nerve-nerve synaptic transmission	7270	7268 synaptic transmission	0.94242	0.08163	2.625	0.16603	0.09701	1	1	3	21	0	0
synaptic transmission\, cholinergic	7271	biological process	0.74042	0.09186	2.99957	0.73579	0.19821	1	1	3	21127	0	0
development	7275	biological process	0.11575	0.58495	197.126	0.97365	0.45173	0.10811	1	199	20931	5	9
development	7275	7268 synaptic transmission	0.31703	0.77395	19.81	0.06202	0.51339	NaN	1	199	22	5	9
gametogenesis	7276	biological process	0.26449	0.24234	7.99697	0.85783	0.95319	1	1	8	21122	0	0
gametogenesis	7276	19953 sexual reproduction	0.12642	0.87022	3.73333	0.54815	0.33566	1	1	8	7	0	0
spermatogenesis	7283	biological process	0.58353	0.23996	4.99882	0.81206	0.53707	1	1	5	21125	0	0
female gamete generation	7292	biological process	0.13438	0.5584	2.99957	0.73579	0.48334	1	1	3	21127	0	0
fertilization (sensu Metazoa)	7338	biological process	0.85508	0.14442	6.99768	0.84644	0.30715	1	1	7	21123	0	0
embryogenesis and morphogenesis	7345	biological process	0.75282	0.28051	4.99882	0.81206	0.47211	1	1	5	21125	0	0
embryogenesis and morphogenesis	7345	8371 obsolete biological process	0.9503	0.15957	4.47917	0.48379	0.28009	1	1	5	43	0	0
embryogenesis and morphogenesis	7345	7338 fertilization (sensu Metazoa)	0.49295	0.62281	2.91667	0.12414	0.87626	1	1	5	7	0	0
ectoderm development	7398	biological process	0.00292	0.96265	14.9893	0.89952	0.03486	0.35095	1	15	21115	7	1
ectoderm development	7398	9888 tissue development	0.02669	0.95625	4.28571	0.00878	0.07984	NaN	1	15	6	7	1
nervous system development	7399	biological process	0.21485	0.40698	41.9165	0.94142	0.76721	0.70212	1	42	21088	2	1
axonogenesis	7409	biological process	0.7322	0.04837	2.99957	0.73579	0.19508	1	1	3	21127	0	0
central nervous system development	7417	biological process	0.65148	0.47247	20.9791	0.91598	0.62373	1	1	21	21109	0	0
central nervous system development	7417	7399 nervous system development	0.81139	0.62484	10.5	0.25385	0.68732	1	1	21	21	0	0
mesoderm development	7498	biological process	0.51602	0.11452	2.99957	0.73579	0.50121	1	1	3	21127	0	0
mesoderm development	7498	9888 tissue development	0.98037	0.00625	2.57143	0.0371	0.03071	1	1	3	18	0	0
heart development	7507	biological process	0.39614	0.90945	2.99957	0.73579	0.4461	0.08279	1	3	21127	33	1
heart development	7507	9887 organ morphogenesis	0.27273	1	2	0.01285	0.2619	NaN	1	3	6	33	1
muscle development	7517	biological process	0.19968	0.6641	12.992	0.89145	0.67262	0.31243	1	13	21117	8	1
muscle development	7517	48513 organ development	0.57326	0.81848	8.17143	0.41819	0.69461	0.00062	1	13	22	8	1
muscle development	7517	30154 cell differentiation	0.2733	0.45452	7.17241	0.64314	0.79244	0.00123	1	13	16	8	1
striated muscle development	7519	biological process	0.62327	0.41929	5.9983	0.83182	0.73214	1	1	6	21124	0	0
striated muscle development	7519	7517 muscle development	0.99557	0.27726	3.23077	0.03568	0.29487	1	1	6	7	0	0
sex differentiation	7548	biological process	0.54422	0.67013	4.99882	0.81206	0.96058	1	1	5	21125	0	0
sex differentiation	7548	7275 development	0.70661	0.69212	4.87437	0.14827	0.85337	1	1	5	194	0	0
pregnancy	7565	biological process	0.95366	0.1604	4.99882	0.81206	0.16946	1	1	5	21125	0	0
physiological process	7582	biological process	0.37018	1e-05	1149.56	NaN	NaN	0.51129	0.98385	1220	19910	4	54
physiological process	7582	8371 obsolete biological process	0.9759	0.01224	21.6103	1.08003	0.00824	NaN	NaN	1220	22	4	54
response to nutrient	7584	biological process	0.30807	0.05957	82.674	NaN	NaN	0.41839	1	83	21047	4	3
response to nutrient	7584	42221 response to chemical stimulus	0.03497	0.56512	13.4141	1.07319	0.16663	NaN	1	83	16	4	3
digestion	7586	biological process	0.0752	0.90684	3.99924	0.78329	0.1474	1	1	4	21126	0	0
digestion	7586	50874 organismal physiological process	0.05037	0.88146	3.93916	0.78682	0.11645	1	1	4	259	0	0
digestion	7586	42221 response to chemical stimulus	0.01612	0.96646	3.15789	0.07267	0.0485	1	1	4	15	0	0
excretion	7588	biological process	0.01753	0.98011	28.9602	0.92904	0.0427	0.19816	1	29	21101	7	2
excretion	7588	50874 organismal physiological process	0.00269	0.95292	25.8023	0.94083	0.01128	5e-05	1	29	234	7	2
excretion	7588	42221 response to chemical stimulus	0.01907	0.95879	10.3111	0.04363	0.03003	NaN	1	29	16	7	2
blood coagulation	7596	biological process	0.16043	0.50026	17.9847	0.90884	0.71631	1	1	18	21112	0	0
hemostasis	7599	biological process	0.16043	0.50026	17.9847	0.90884	0.71631	1	1	18	21112	0	0
sensory perception	7600	biological process	0.71297	0.14162	73.7408	NaN	NaN	0.88181	1	74	21056	1	1
sensory perception	7600	50896 response to stimulus	0.25042	0.55095	48.4112	0.98305	NaN	0.02083	1	74	140	1	1
visual perception	7601	biological process	0.84942	0.13402	21.9771	0.91801	0.30795	1	1	22	21108	0	0
visual perception	7601	50896 response to stimulus	0.45238	0.44247	19.7383	0.93054	0.9247	1	1	22	192	0	0
phototransduction	7602	biological process	0.78185	0.35689	5.9983	0.83182	0.72114	1	1	6	21124	0	0
phototransduction	7602	50896 response to stimulus	0.74895	0.55541	5.83178	0.83758	0.99466	1	1	6	208	0	0
sensory perception of sound	7605	biological process	0.71082	0.32275	5.9983	0.83182	0.7849	1	1	6	21124	0	0
sensory perception of chemical stimulus	7606	biological process	0.00111	0.99868	4.99882	0.81206	0.00193	0.13415	1	5	21125	20	1
sensory perception of chemical stimulus	7606	7600 sensory perception	0.00028	1	4.66216	0.82748	0.00124	NaN	1	5	69	20	1
sensory perception of smell	7608	biological process	0.00111	0.99868	4.99882	0.81206	0.00193	0.13415	1	5	21125	20	1
behavior	7610	biological process	0.98071	0.00747	12.992	0.89145	0.00583	1	0.04567	13	21117	15	2
behavior	7610	50896 response to stimulus	0.98634	0.03598	12.2212	0.90056	0.02398	1	1e-05	13	204	15	2
learning and/or memory	7611	biological process	0.74042	0.09186	2.99957	0.73579	0.19821	1	1	3	21127	0	0
learning and/or memory	7611	7610 behavior	0.12135	0.79109	2.30769	0.06628	0.46154	1	1	3	10	0	0
memory	7613	biological process	0.74042	0.09186	2.99957	0.73579	0.19821	1	1	3	21127	0	0
locomotory behavior	7626	biological process	0.99715	0.00909	6.99768	0.84644	0.00335	1	0.01366	7	21123	29	2
locomotory behavior	7626	7610 behavior	1	0.07756	3.23077	0.53081	0.0979	1	NaN	7	6	29	2
circulation	8015	biological process	0.90992	0.02932	13.9907	0.89572	0.05677	0.33197	0.05236	14	21116	21	3
circulation	8015	50874 organismal physiological process	0.94778	0.04465	13.2547	0.90349	0.10001	0.00595	1e-05	14	249	21	3
tRNA processing	8033	biological process	0.97472	0.03832	2.99957	0.73579	0.07548	1	1	3	21127	0	0
tRNA processing	8033	6396 RNA processing	1	0.00668	2.71875	0.34603	0.01672	1	1	3	29	0	0
tRNA processing	8033	6399 tRNA metabolism	1	0.04366	2.775	0.94649	0.06087	1	1	3	37	0	0
establishment of blood-nerve barrier	8065	biological process	0.05225	0.99623	2.99957	0.73579	0.04821	0.08279	1	3	21127	33	1
establishment of blood-nerve barrier	8065	7399 nervous system development	0.03694	1	2.78571	0.16271	0.02467	NaN	1	3	39	33	1
protein localization	8104	biological process	0.95567	0.05816	15.9879	0.90294	0.07639	1	1	16	21114	0	0
protein localization	8104	51179 localization	0.97786	0.13576	14.887	0.9126	0.08513	1	1	16	214	0	0
metabolism	8152	biological process	0.25612	0.00721	635.634	NaN	NaN	0.73311	0.99634	656	20474	4	24
metabolism	8152	7582 physiological process	0.01278	0.95148	303.266	NaN	NaN	0	0	656	564	4	24
steroid metabolism	8202	biological process	0.17212	0.81612	11.9932	0.88661	0.36353	0.29233	1	12	21118	8	1
cholesterol metabolism	8203	biological process	0.02911	0.99841	3.99924	0.78329	0.03611	0.10884	1	4	21126	25	1
blood pressure regulation	8217	biological process	0.87233	0.09662	10.9943	0.88107	0.10648	0.27163	0.03335	11	21119	27	3
blood pressure regulation	8217	8015 circulation	0.82104	0.57827	2.35714	0.41663	0.88462	NaN	NaN	11	3	27	3
cell death	8219	biological process	0.06606	0.82708	81.6818	0.95844	0.23373	0.20176	0.89213	82	21048	6	5
cell death	8219	50875 cellular physiological process	0.0151	0.99417	64.6253	0.97274	0.07023	0	0.00775	82	305	6	5
sulfate transport	8272	biological process	0.83674	0.26903	14.9893	0.89952	0.50847	1	1	15	21115	0	0
sulfate transport	8272	15698 inorganic anion transport	0.26174	0.65543	6.96429	0.18789	0.48952	1	1	15	13	0	0
sulfate transport	8272	50875 cellular physiological process	0.81627	0.47625	14.411	0.905	0.65551	1	1	15	367	0	0
regulation of G-protein coupled receptor protein signaling pathway	8277	biological process	0.94648	0.00185	6.99768	0.84644	0.00892	1	1	7	21123	0	0
regulation of G-protein coupled receptor protein signaling pathway	8277	7186 G-protein coupled receptor protein signaling pathway	0.9166	0.0038	6.50505	0.86066	0.02031	1	1	7	92	0	0
cell proliferation	8283	biological process	0.40651	0.73601	42.9125	NaN	NaN	0.7106	0.68858	43	21087	5	2
cell proliferation	8283	50875 cellular physiological process	0.39325	0.67752	38.1342	NaN	NaN	0.01617	0.00407	43	337	5	2
cell proliferation	8283	9966 regulation of signal transduction	0.01705	0.88293	7.44231	1.09922	0.09511	0.00204	NaN	43	9	5	2
positive regulation of cell proliferation	8284	biological process	0.78057	0.62686	9.99527	0.87463	0.88997	1	1	10	21120	0	0
positive regulation of cell proliferation	8284	42127 regulation of cell proliferation	0.71541	0.75175	4.11765	0.01499	0.96226	1	1	10	7	0	0
negative regulation of cell proliferation	8285	biological process	0.67609	0.7398	7.99697	0.85783	0.91514	0.20586	1	8	21122	13	1
negative regulation of cell proliferation	8285	42127 regulation of cell proliferation	0.59067	0.79136	4.44444	0.02191	1	NaN	1	8	10	13	1
spermidine biosynthesis	8295	biological process	0.68165	0.2247	51.872	NaN	NaN	0.77682	1	52	21078	2	1
isoprenoid biosynthesis	8299	biological process	0.23332	0.22848	2.99957	0.73579	0.93881	1	1	3	21127	0	0
isoprenoid biosynthesis	8299	8610 lipid biosynthesis	0.05666	0.59021	2.30769	0.00545	0.37063	1	1	3	10	0	0
regulation of cell size	8361	biological process	0.49418	0.47179	3.99924	0.78329	0.91549	1	1	4	21126	0	0
regulation of cell size	8361	902 cellular morphogenesis	0.17966	0.70139	2.22222	0.24122	0.73016	1	1	4	5	0	0
regulation of cell size	8361	50791 regulation of physiological process	0.51211	0.60705	3.30435	0.98276	0.83931	1	1	4	19	0	0
obsolete biological process	8371	biological process	0.11842	0.72453	47.891	0.94531	0.3948	0.15415	0.36796	48	21082	10	5
RNA splicing	8380	biological process	0.54154	0.26343	2.99957	0.73579	0.68017	1	1	3	21127	0	0
RNA splicing	8380	6396 RNA processing	0.70039	0.11794	2.71875	0.48615	0.40052	1	1	3	29	0	0
gonad development	8406	biological process	0.67987	0.20801	2.99957	0.73579	0.36441	1	1	3	21127	0	0
gonad development	8406	9887 organ morphogenesis	1	0.09928	2	0.0816	0.09524	1	1	3	6	0	0
epidermis development	8544	biological process	0.00479	0.95483	13.9907	0.89572	0.03186	0.33197	1	14	21116	7	1
male gonad development	8584	biological process	0.67987	0.20801	2.99957	0.73579	0.36441	1	1	3	21127	0	0
lipid biosynthesis	8610	biological process	0.99976	0.16725	12.992	0.89145	0.09406	1	0.29703	13	21117	8	1
lipid biosynthesis	8610	9058 biosynthesis	0.99754	0.13043	10.6849	0.00011	0.06186	1	NaN	13	60	8	1
apoptotic program	8632	biological process	0.12409	0.39307	3.99924	0.78329	0.57312	1	1	4	21126	0	0
apoptotic program	8632	6915 apoptosis	0.29324	0.40605	3.8	0.01151	0.74054	1	1	4	76	0	0
carbohydrate transport	8643	biological process	0.62494	0.4943	3.99924	0.78329	0.8175	0.10884	1	4	21126	25	1
carbohydrate transport	8643	6810 transport	0.60783	0.46086	3.94953	0.7862	0.79003	0.00132	1	4	313	25	1
catabolism	9056	biological process	0.63878	0.61483	42.9125	0.94212	0.93998	0.7106	0.68858	43	21087	5	2
catabolism	9056	8152 metabolism	0.33989	0.86415	40.1814	0.94768	0.673	0.0301	0.01416	43	613	5	2
macromolecule catabolism	9057	biological process	0.09762	0.91709	30.9545	0.93145	0.19539	0.59084	0.56864	31	21099	6	2
macromolecule catabolism	9057	9056 catabolism	0.00667	0.92318	8.65116	0.01734	0.01537	NaN	NaN	31	12	6	2
macromolecule catabolism	9057	43170 macromolecule metabolism	0.08496	0.80099	25.2108	0.63604	0.18144	0.00586	NaN	31	135	6	2
biosynthesis	9058	biological process	0.01184	0.28342	64.8	0.95319	0.63985	0.55364	1	65	21065	3	2
biosynthesis	9058	8152 metabolism	0.01393	0.74839	58.5594	0.96017	0.35856	0.00083	1	65	591	3	2
biosynthesis	9058	43170 macromolecule metabolism	0.2301	0.53369	44.5894	0.13448	0.88273	6e-05	1	65	142	3	2
macromolecule biosynthesis	9059	biological process	0.20701	0.69656	39.9243	0.93992	0.60219	0.68442	1	40	21090	3	1
macromolecule biosynthesis	9059	43170 macromolecule metabolism	0.57716	0.68191	31.2088	0.24562	0.80542	0.00755	1	40	142	3	1
aerobic respiration	9060	biological process	0.13438	0.30647	2.99957	0.73579	0.73992	1	1	3	21127	0	0
coenzyme biosynthesis	9108	biological process	0.25299	0.42805	2.99957	0.73579	0.95494	1	1	3	21127	0	0
coenzyme biosynthesis	9108	6732 coenzyme metabolism	0.45443	0.2916	2.35714	0.08553	0.97802	1	1	3	11	0	0
nucleoside metabolism	9116	biological process	0.00732	0.97357	5.9983	0.83182	0.01071	1	1	6	21124	0	0
nucleoside metabolism	9116	6139 nucleobase\, nucleoside\, nucleotide and nucleic acid metabolism	0.00455	0.9803	5.89535	0.37072	0.00697	1	1	6	338	0	0
nucleotide metabolism	9117	biological process	0.19372	0.4245	7.99697	0.85783	0.61862	1	1	8	21122	0	0
nucleotide metabolism	9117	6139 nucleobase\, nucleoside\, nucleotide and nucleic acid metabolism	0.17021	0.52025	7.81395	0.004	0.47966	1	1	8	336	0	0
purine ribonucleoside monophosphate biosynthesis	9168	biological process	0.54245	0.41942	2.99957	0.73579	0.94924	1	1	3	21127	0	0
amine metabolism	9308	biological process	0.09672	0.85377	5.9983	0.83182	0.40119	1	1	6	21124	0	0
amine metabolism	9308	6807 nitrogen compound metabolism	0.10167	0.81065	5.57647	0.84691	0.40532	1	1	6	79	0	0
amine metabolism	9308	44237 cellular metabolism	0.05124	0.75049	5.77914	0.83946	0.22557	1	1	6	157	0	0
response to radiation	9314	biological process	0.82532	0.24217	6.99768	0.84644	0.52658	1	1	7	21123	0	0
response to radiation	9314	9628 response to abiotic stimulus	0.84963	0.3479	6.56637	0.85881	0.62109	1	1	7	106	0	0
phosphoenolpyruvate-dependent sugar phosphotransferase system	9401	biological process	0.50246	0.76822	2.99957	0.73579	0.80256	0.08279	1	3	21127	33	1
pathogenesis	9405	biological process	0.77469	0.16166	6.99768	0.84644	0.27183	0.18264	0.17283	7	21123	29	2
pathogenesis	9405	44237 cellular metabolism	0.81226	0.20201	6.70122	0.85483	0.19726	0.00166	NaN	7	157	29	2
response to xenobiotic stimulus	9410	biological process	0.95162	0.0859	4.99882	0.81206	0.14204	1	1	5	21125	0	0
response to xenobiotic stimulus	9410	42221 response to chemical stimulus	0.5406	0.37275	3.4375	0.13299	0.71749	1	1	5	11	0	0
response to xenobiotic stimulus	9410	44237 cellular metabolism	0.94369	0.05676	4.84568	0.81886	0.1017	1	1	5	157	0	0
response to light stimulus	9416	biological process	0.82532	0.24217	6.99768	0.84644	0.52658	1	1	7	21123	0	0
response to light stimulus	9416	44237 cellular metabolism	0.83293	0.12982	6.69375	0.85504	0.41839	1	1	7	153	0	0
carnitine metabolism	9437	biological process	0.63772	0.11913	2.99957	0.73579	0.40049	1	1	3	21127	0	0
carnitine metabolism	9437	6576 biogenic amine metabolism	0.68367	0.28672	2.87671	0.7463	0.72831	1	1	3	70	0	0
carnitine metabolism	9437	19752 carboxylic acid metabolism	0.56133	0.56133	2	0.54896	1	1	1	3	6	0	0
putrescine biosynthesis	9446	biological process	0.02159	0.99211	7.99697	0.85783	0.05135	0.20586	1	8	21122	13	1
putrescine biosynthesis	9446	6596 polyamine biosynthesis	0.01165	0.9546	6.76923	0.88901	0.03418	NaN	1	8	44	13	1
fertilization	9566	biological process	0.85508	0.14442	6.99768	0.84644	0.30715	1	1	7	21123	0	0
fertilization	9566	19953 sexual reproduction	0.75271	0.11668	3.23077	0.41205	0.62821	1	1	7	6	0	0
fertilization	9566	30154 cell differentiation	0.85538	0.23105	5.18519	0.01255	0.5246	1	1	7	20	0	0
detection of external stimulus	9581	biological process	0.88412	0.12563	8.99617	0.86701	0.46285	1	1	9	21121	0	0
detection of external stimulus	9581	9605 response to external stimulus	0.62525	0.1558	8.44898	0.878	0.71315	1	1	9	138	0	0
detection of abiotic stimulus	9582	biological process	0.78185	0.35689	5.9983	0.83182	0.72114	1	1	6	21124	0	0
detection of abiotic stimulus	9582	9628 response to abiotic stimulus	0.71586	0.28377	5.68142	0.843	0.79294	1	1	6	107	0	0
detection of light stimulus	9583	biological process	0.72278	0.19728	4.99882	0.81206	0.45782	1	1	5	21125	0	0
detection of light stimulus	9583	9581 detection of external stimulus	0.70139	0.49898	2.22222	0.75231	0.90476	1	1	5	4	0	0
rhodopsin mediated phototransduction	9586	biological process	0.97472	0.01224	2.99957	0.73579	0.04587	1	1	3	21127	0	0
rhodopsin mediated phototransduction	9586	7601 visual perception	1	0.01778	2.59091	0.57104	0.05541	1	1	3	19	0	0
detection of biotic stimulus	9595	biological process	0.7793	0.25148	2.99957	0.73579	0.4433	1	1	3	21127	0	0
detection of biotic stimulus	9595	9607 response to biotic stimulus	0.73326	0.47804	2.95361	0.73961	0.69372	1	1	3	191	0	0
response to external stimulus	9605	biological process	0.94911	0.00555	140.059	NaN	NaN	0.56676	0.32033	141	20989	6	9
response to external stimulus	9605	50896 response to stimulus	0.61934	0.44906	81.2973	NaN	NaN	0	0	141	192	6	9
response to biotic stimulus	9607	biological process	0.96784	0.00014	192.219	NaN	NaN	0.64248	0.01382	194	20936	8	16
response to biotic stimulus	9607	50896 response to stimulus	0.97838	0.0308	43.456	1.03203	0.0399	NaN	NaN	194	56	8	16
response to biotic stimulus	9607	50874 organismal physiological process	0.99229	0.00029	73.7572	1.01061	0.00054	0	NaN	194	119	8	16
response to wounding	9611	biological process	0.49175	0.32718	19.9811	0.91379	0.73278	1	0.4186	20	21110	5	1
response to wounding	9611	16045 detection of bacteria	0.06148	0.66542	16.1165	0.07435	0.1977	1	0.00567	20	83	5	1
response to wounding	9611	9605 response to external stimulus	0.08604	0.77472	17.1631	0.93236	0.30245	1	0.00378	20	121	5	1
response to wounding	9611	16045 detection of bacteria	0.17621	0.59328	2.6087	0.26412	0.55294	1	NaN	20	3	5	1
response to pest\, pathogen or parasite	9613	biological process	0.01479	0.96154	9.99527	0.87463	0.02972	1	1	10	21120	0	0
response to pest\, pathogen or parasite	9613	6950 response to stress	0.00035	0.97941	9.02913	0.09256	0.001	1	1	10	93	0	0
response to pest\, pathogen or parasite	9613	16045 detection of bacteria	0.1524	0.99351	2.30769	0.15887	0.28671	1	1	10	3	0	0
response to bacteria	9617	biological process	0.43017	0.72414	4.99882	0.81206	0.94998	1	1	5	21125	0	0
response to bacteria	9617	51707 response to other organism	0.99417	0.26839	2.91667	0.64349	0.34343	1	1	5	7	0	0
response to abiotic stimulus	9628	biological process	0.64578	0.03572	106.458	NaN	NaN	0.35801	0.78317	107	21023	6	6
response to abiotic stimulus	9628	50896 response to stimulus	0.09456	0.65223	69.7068	NaN	NaN	0	0.00038	107	200	6	6
response to abiotic stimulus	9628	12501 programmed cell death	0.96701	0.00504	45.4462	1.00855	0.03738	NaN	NaN	107	79	6	6
response to toxin	9636	biological process	0.49576	0.74463	3.99924	0.78329	0.98381	1	1	4	21126	0	0
response to toxin	9636	42221 response to chemical stimulus	0.08231	0.63212	3	0.06751	0.37363	1	1	4	12	0	0
morphogenesis	9653	biological process	0.3451	0.12749	34.942	0.93563	0.70146	0.63544	1	35	21095	3	1
morphogenesis	9653	7275 development	0.68499	0.18675	28.8442	0.11267	0.44738	0.01318	1	35	164	3	1
response to endogenous stimulus	9719	biological process	0.53308	0.63727	3.99924	0.78329	0.76722	1	1	4	21126	0	0
response to endogenous stimulus	9719	50896 response to stimulus	0.32397	0.8386	3.92523	0.78765	0.51432	1	1	4	210	0	0
organ morphogenesis	9887	biological process	0.3506	0.36501	8.99617	0.86701	0.84493	0.22842	1	9	21121	11	1
organ morphogenesis	9887	9653 morphogenesis	0.47429	0.67143	6.68571	0.00045	0.77712	NaN	1	9	26	11	1
organ morphogenesis	9887	48513 organ development	0.73254	0.56645	6.86842	0.20451	0.94525	0.00043	1	9	29	11	1
tissue development	9888	biological process	0.03541	0.90641	20.9791	0.91598	0.09319	0.45405	1	21	21109	5	1
tissue development	9888	7275 development	0.05009	0.91302	18.7839	0.60475	0.08676	0.00792	1	21	178	5	1
tissue development	9888	48513 organ development	0.15285	0.94014	12.5192	0.76986	0.19816	0.00199	1	21	31	5	1
negative regulation of metabolism	9892	biological process	0.80782	0.66647	2.99957	0.73579	0.7962	1	1	3	21127	0	0
negative regulation of metabolism	9892	43118 negative regulation of physiological process	0.89305	0.27048	2.78571	0.92566	0.43454	1	1	3	39	0	0
regulation of signal transduction	9966	biological process	0.83039	0.02064	8.99617	0.86701	0.12645	0.22842	1	9	21121	11	1
regulation of signal transduction	9966	7165 signal transduction	0.82427	0.01934	8.71071	0.87264	0.12565	0.00255	1	9	271	11	1
regulation of signal transduction	9966	50794 regulation of cellular process	0.85295	0.12727	5.625	0.01139	0.40383	NaN	1	9	15	11	1
cellular process	9987	biological process	0.12361	0	1098.99	NaN	NaN	0.47603	0.99948	1163	19967	4	47
response to extracellular stimulus	9991	biological process	0.30807	0.05957	82.674	NaN	NaN	0.41839	1	83	21047	4	3
response to extracellular stimulus	9991	7154 cell communication	0.46062	0.25374	64.966	NaN	NaN	0	1	83	299	4	3
response to extracellular stimulus	9991	9605 response to external stimulus	0.01488	0.98638	34.1418	1.01169	0.03127	NaN	1	83	58	4	3
response to extracellular stimulus	9991	50875 cellular physiological process	0.75643	0.08236	64.2289	NaN	NaN	0	1	83	284	4	3
programmed cell death	12501	biological process	0.08088	0.8429	80.6895	0.95818	0.2587	0.19594	0.88915	81	21049	6	5
induction of programmed cell death	12502	biological process	0.08166	0.99344	27.9629	0.92773	0.11278	0.04375	1	28	21102	11	3
protein transport	15031	biological process	0.95828	0.02746	14.9893	0.89952	0.06606	1	1	15	21115	0	0
protein transport	15031	6810 transport	0.95935	0.06608	14.2902	0.90618	0.0677	1	1	15	302	0	0
monovalent inorganic cation transport	15672	biological process	0.91721	0.37248	11.9932	0.88661	0.45131	1	1	12	21118	0	0
monovalent inorganic cation transport	15672	6812 cation transport	0.70686	0.32496	8.65116	0.20013	0.75546	1	1	12	31	0	0
monovalent inorganic cation transport	15672	45184 establishment of protein localization	0.26485	0.94082	5.73913	0.60817	0.3401	1	1	12	11	0	0
di-\, tri-valent inorganic cation transport	15674	biological process	0.36608	0.41498	3.99924	0.78329	0.85627	1	1	4	21126	0	0
di-\, tri-valent inorganic cation transport	15674	6812 cation transport	0.2772	0.56539	3.62791	0.20315	0.78574	1	1	4	39	0	0
di-\, tri-valent inorganic cation transport	15674	15672 monovalent inorganic cation transport	0.15966	0.63212	3	0.13311	0.5989	1	1	4	12	0	0
inorganic anion transport	15698	biological process	0.91599	0.12627	27.9629	0.92773	0.1645	1	1	28	21102	0	0
inorganic anion transport	15698	6820 anion transport	0.73452	0.23494	2.70968	0.53193	0.33259	1	1	28	3	0	0
organic acid transport	15849	biological process	0.85981	0.46927	3.99924	0.78329	0.59133	1	1	4	21126	0	0
organic acid transport	15849	6810 transport	0.70189	0.59096	3.94953	0.7862	0.74393	1	1	4	313	0	0
thiamin transport	15888	biological process	0.46132	0.54879	2.99957	0.73579	0.97108	1	1	3	21127	0	0
energy derivation by oxidation of organic compounds	15980	biological process	0.13438	0.30647	2.99957	0.73579	0.73992	1	1	3	21127	0	0
energy derivation by oxidation of organic compounds	15980	6091 generation of precursor metabolites and energy	0.07829	0.59375	2.87838	0.74615	0.36575	1	1	3	71	0	0
proton transport	15992	biological process	0.94149	0.24977	18.9829	0.91142	0.32181	1	1	19	21111	0	0
proton transport	15992	6818 hydrogen transport	0.91	0.64563	5.62963	0.84409	0.81106	1	1	19	8	0	0
proton transport	15992	15672 monovalent inorganic cation transport	0.75148	0.80686	7.35484	0.40692	0.98381	1	1	19	12	0	0
lipid catabolism	16042	biological process	0.87444	0.08428	10.9943	0.88107	0.06415	1	1	11	21119	0	0
lipid catabolism	16042	6629 lipid metabolism	0.90977	0.16109	8.8	0.91733	0.07713	1	1	11	44	0	0
lipid catabolism	16042	9056 catabolism	0.93124	0.0165	8.18605	0.03599	0.02165	1	1	11	32	0	0
cell organization and biogenesis	16043	biological process	0.2759	0.72933	70.7614	0.95526	0.86073	0.8711	1	71	21059	1	1
cell organization and biogenesis	16043	50875 cellular physiological process	0.07964	0.73425	58.4289	0.96784	0.62622	0.02984	1	71	330	1	1
cell organization and biogenesis	16043	9056 catabolism	0.56464	0.54367	26.7807	0.47615	0.9627	0.00336	1	71	43	1	1
detection of bacteria	16045	biological process	0.7793	0.25148	2.99957	0.73579	0.4433	1	1	3	21127	0	0
detection of bacteria	16045	9581 detection of external stimulus	0.86557	0.56133	2	1.12703	0.90476	1	1	3	6	0	0
Wnt receptor signaling pathway	16055	biological process	0.12255	0.90254	6.99768	0.84644	0.18127	0.18264	1	7	21123	14	1
Wnt receptor signaling pathway	16055	7166 cell surface receptor linked signal transduction	0.05427	0.92899	6.67114	0.85571	0.10634	0.00066	1	7	142	14	1
Wnt receptor signaling pathway	16055	50875 cellular physiological process	0.08	0.98596	6.86898	0.85002	0.08858	0.00298	1	7	367	14	1
RNA metabolism	16070	biological process	0.09358	0.99884	22.975	0.9199	0.0912	0.13749	1	23	21107	9	2
RNA metabolism	16070	6139 nucleobase\, nucleoside\, nucleotide and nucleic acid metabolism	0.0652	1	21.4622	0.00099	0.05325	2e-05	1	23	321	9	2
RNA metabolism	16070	43283 biopolymer metabolism	0.09814	0.65927	13.2037	0.00018	0.31865	NaN	1	23	31	9	2
RNA metabolism	16070	50875 cellular physiological process	0.02166	0.97536	21.6436	0.92672	0.0676	4e-05	1	23	367	9	2
vesicle-mediated transport	16192	biological process	0.50807	0.62686	9.99527	0.87463	0.93512	1	1	10	21120	0	0
vesicle-mediated transport	16192	6810 transport	0.58287	0.8134	9.68454	0.87989	0.73116	1	1	10	307	0	0
death	16265	biological process	0.03335	0.87605	79.6971	0.95791	0.16649	0.19018	0.88609	80	21050	6	5
death	16265	7582 physiological process	0.00371	0.98811	74.7541	0.9619	0.02015	0	0.07309	80	1140	6	5
cytokinesis	16288	biological process	0.78602	0.56948	2.99957	0.73579	0.69441	1	1	3	21127	0	0
cytokinesis	16288	8371 obsolete biological process	0.88395	0.5604	2.8125	0.83463	0.70145	1	1	3	45	0	0
cell-cell adhesion	16337	biological process	0.97656	0.20374	13.9907	0.89572	0.228	1	0.31584	14	21116	7	1
cell-cell adhesion	16337	7155 cell adhesion	0.93421	0.61636	11.55	0.58586	0.71345	1	0.00199	14	66	7	1
negative regulation of transcription	16481	biological process	0.80782	0.66647	2.99957	0.73579	0.7962	1	1	3	21127	0	0
negative regulation of protein biosynthesis	17148	biological process	0.67776	0.11139	2.99957	0.73579	0.40416	1	1	3	21127	0	0
peptidyl-diphthamide metabolism	17182	biological process	0.15315	0.7476	3.99924	0.78329	0.52492	1	1	4	21126	0	0
peptidyl-diphthamide biosynthesis from peptidyl-histidine	17183	biological process	0.15315	0.7476	3.99924	0.78329	0.52492	1	1	4	21126	0	0
peptidyl-diphthamide biosynthesis from peptidyl-histidine	17183	9058 biosynthesis	0.34661	0.82315	3.75385	0.2484	0.59449	1	1	4	61	0	0
transmission of nerve impulse	19226	biological process	0.38326	0.59761	22.975	0.9199	0.72067	1	0.46404	23	21107	4	1
transmission of nerve impulse	19226	7267 cell-cell signaling	0.22028	0.58695	14.9848	0.26493	0.45107	1	0.00218	23	43	4	1
transmission of nerve impulse	19226	50877 neurophysiological process	0.26913	0.75609	17.3118	0.95228	0.49855	1	NaN	23	70	4	1
protein metabolism	19538	biological process	0.00181	0.67958	114.374	0.96505	0.10729	0.40933	1	115	21015	3	4
protein metabolism	19538	43170 macromolecule metabolism	0.02355	0.81738	40.7022	0.26387	0.15544	NaN	1	115	63	3	4
protein metabolism	19538	44238 primary metabolism	0.09544	0.85101	41.9337	0.03843	0.42872	NaN	1	115	66	3	4
cell homeostasis	19725	biological process	0.29546	0.46537	9.99527	0.87463	0.97262	0.25033	0.02777	10	21120	30	3
cell homeostasis	19725	50875 cellular physiological process	0.19115	0.43425	9.7319	0.87908	0.95022	0.00378	0	10	363	30	3
antimicrobial humoral response (sensu Vertebrata)	19735	biological process	0.93959	0.0209	15.9879	0.90294	0.0367	1	0.35196	16	21114	6	1
carboxylic acid metabolism	19752	biological process	0.84418	0.04055	5.9983	0.83182	0.16199	1	1	6	21124	0	0
carboxylic acid metabolism	19752	6082 organic acid metabolism	0.94496	0.06241	5.56098	0.8475	0.13242	1	1	6	76	0	0
sexual reproduction	19953	biological process	0.83961	0.03127	12.992	0.89145	0.30929	1	1	13	21117	0	0
sexual reproduction	19953	3 reproduction	0.62719	0.15474	3.05882	0.2553	0.47731	1	1	13	4	0	0
cation homeostasis	30003	biological process	0.33351	0.88728	6.99768	0.84644	0.48956	1	1	7	21123	0	0
actin filament-based process	30029	biological process	0.24545	0.30554	19.9811	0.91379	0.71975	0.43808	1	20	21110	5	1
actin filament-based process	30029	7010 cytoskeleton organization and biogenesis	0.62699	0.22035	7.5	0.87224	0.5207	NaN	1	20	12	5	1
actin cytoskeleton organization and biogenesis	30036	biological process	0.24545	0.30554	19.9811	0.91379	0.71975	0.43808	1	20	21110	5	1
hemopoiesis	30097	biological process	0.29258	0.35347	4.99882	0.81206	0.84952	1	1	5	21125	0	0
myeloid cell differentiation	30099	biological process	0.36608	0.406	3.99924	0.78329	0.83861	1	1	4	21126	0	0
myeloid cell differentiation	30099	30154 cell differentiation	0.33558	0.33558	3.2	0.07306	0.81326	1	1	4	16	0	0
cell differentiation	30154	biological process	0.40616	0.67191	19.9811	0.91379	0.74832	0.10902	1	20	21110	10	2
cell differentiation	30154	7275 development	0.34774	0.37555	17.99	0.05519	0.98693	2e-05	1	20	179	10	2
cell differentiation	30154	9987 cellular process	0.25897	0.77339	19.6561	0.91579	0.57086	0.00036	1	20	1143	10	2
keratinocyte differentiation	30216	biological process	0.58062	0.4801	3.99924	0.78329	0.80377	0.10884	1	4	21126	25	1
keratinocyte differentiation	30216	30154 cell differentiation	0.61552	0.46848	3.2	0.04971	0.81326	0.00019	1	4	16	25	1
monocyte differentiation	30224	biological process	0.45867	0.10121	2.99957	0.73579	0.41649	1	1	3	21127	0	0
sperm motility	30317	biological process	0.48163	0.91669	2.99957	0.73579	0.60862	1	1	3	21127	0	0
sperm motility	30317	6928 cell motility	0.0616	0.77815	2.5	0.74137	0.30147	1	1	3	15	0	0
cell-substrate adhesion	31589	biological process	0.27039	0.90798	15.9879	0.90294	0.38021	1	1	16	21114	0	0
cell-substrate adhesion	31589	7155 cell adhesion	0.0662	0.89709	12.8	0.01394	0.0452	1	1	16	64	0	0
growth	40007	biological process	0.10253	0.96958	6.99768	0.84644	0.15413	1	1	7	21123	0	0
locomotion	40011	biological process	0.67991	0.05772	15.9879	0.90294	0.2207	1	0.35196	16	21114	6	1
locomotion	40011	7582 physiological process	0.71913	0.17846	15.7902	0.90462	0.36813	1	0.01504	16	1204	6	1
wound healing	42060	biological process	0.16043	0.50026	17.9847	0.90884	0.71631	1	1	18	21112	0	0
regulation of cell proliferation	42127	biological process	0.59825	0.7971	16.9863	0.90603	0.97695	0.38731	1	17	21113	6	1
regulation of cell proliferation	42127	8283 cell proliferation	0.66189	0.7291	10.2791	0.97338	0.59327	NaN	1	17	26	6	1
response to chemical stimulus	42221	biological process	0.83255	0.0773	15.9879	0.90294	0.09916	0.36939	0.06668	16	21114	19	3
response to chemical stimulus	42221	9628 response to abiotic stimulus	0.56689	0.02799	13.6075	0.92485	0.16351	0.00227	NaN	16	91	19	3
ribosome biogenesis and assembly	42254	biological process	0.92271	0.05157	5.9983	0.83182	0.14254	1	1	6	21124	0	0
ribosome biogenesis and assembly	42254	6996 organelle organization and biogenesis	0.87228	0.10271	5.44615	0.66298	0.18486	1	1	6	59	0	0
ribosome biogenesis and assembly	42254	7028 cytoplasm organization and biogenesis	1	0.00898	4.2	0.59015	0.00439	1	1	6	14	0	0
ribosome biogenesis and assembly	42254	42060 wound healing	1	0.00933	4.5	0.40779	0.03573	1	1	6	18	0	0
taxis	42330	biological process	0.99715	0.00909	6.99768	0.84644	0.00335	1	0.01366	7	21123	29	2
taxis	42330	9605 response to external stimulus	1	0.0084	6.65248	0.85625	0.00892	1	0	7	134	29	2
negative regulation of physiological process	43118	biological process	0.01597	0.99095	38.928	0.93913	0.06689	0.09753	1	39	21091	8	3
negative regulation of physiological process	43118	50791 regulation of physiological process	0.14331	0.92061	12.3158	0.62533	0.1011	NaN	1	39	18	8	3
positive regulation of physiological process	43119	biological process	0.95324	0.30746	11.9932	0.88661	0.39334	1	1	12	21118	0	0
positive regulation of physiological process	43119	50791 regulation of physiological process	0.85882	0.32973	7.03448	0.12242	0.54998	1	1	12	17	0	0
macromolecule metabolism	43170	biological process	0.10095	0.60797	144.005	0.96897	0.49977	0.58891	1	145	20985	3	4
macromolecule metabolism	43170	8152 metabolism	0.11814	0.80565	112.95	0.98013	0.17679	0	1	145	511	3	4
biopolymer metabolism	43283	biological process	0.06956	0.53287	30.9545	0.93145	0.61154	1	1	31	21099	0	0
biopolymer metabolism	43283	43170 macromolecule metabolism	0.27757	0.69461	24.3724	0.01002	0.7964	1	1	31	114	0	0
regulation of kinase activity	43549	biological process	0.16999	0.99562	3.99924	0.78329	0.18677	0.10884	1	4	21126	25	1
cellular metabolism	44237	biological process	0.10584	0.02666	155.833	NaN	NaN	0.45571	1	157	20973	3	5
cellular metabolism	44237	8152 metabolism	0.20554	0.32221	119.425	0.98194	NaN	0	1	157	499	3	5
cellular metabolism	44237	50875 cellular physiological process	0.18817	0.60283	107.103	NaN	NaN	0	1	157	337	3	5
primary metabolism	44238	biological process	0.07899	0.96948	73.7408	0.9562	0.39194	0.62437	1	74	21056	3	2
primary metabolism	44238	8152 metabolism	0.05706	0.9805	65.6524	0.9637	0.18704	0.00107	1	74	582	3	2
primary metabolism	44238	50875 cellular physiological process	0.0462	0.97659	61.4115	0.96798	0.23761	0.00043	1	74	361	3	2
symbiosis\, encompassing mutualism through parasitism	44403	biological process	0.77469	0.16166	6.99768	0.84644	0.27183	0.18264	0.17283	7	21123	29	2
interspecies interaction between organisms	44419	biological process	0.77469	0.16166	6.99768	0.84644	0.27183	0.18264	0.17283	7	21123	29	2
interspecies interaction between organisms	44419	51704 interaction between organisms	0.49295	0.62281	2.91667	0.11288	0.87626	NaN	NaN	7	5	29	2
secretory pathway	45045	biological process	0.59503	0.63089	2.99957	0.73579	0.92	1	1	3	21127	0	0
secretory pathway	45045	6810 transport	0.61972	0.73621	2.97161	0.7381	0.95962	1	1	3	314	0	0
innate immune response	45087	biological process	0.7793	0.25148	2.99957	0.73579	0.4433	1	1	3	21127	0	0
innate immune response	45087	6955 immune response	0.72441	0.50896	2.95109	0.73983	0.71834	1	1	3	181	0	0
development of primary sexual characteristics	45137	biological process	0.67987	0.20801	2.99957	0.73579	0.36441	1	1	3	21127	0	0
establishment of protein localization	45184	biological process	0.96877	0.01482	10.9943	0.88107	0.03186	1	1	11	21119	0	0
establishment of protein localization	45184	8104 protein localization	0.99727	0.10036	3.4375	0.83732	0.22115	1	1	11	5	0	0
establishment of protein localization	45184	51234 establishment of localization	0.99942	0.02619	10.4238	0.88961	0.0299	1	1	11	199	0	0
negative regulation of progression through cell cycle	45786	biological process	0.00785	0.98735	31.9515	0.93257	0.04927	0.22958	1	32	21098	6	2
negative regulation of progression through cell cycle	45786	74 regulation of progression through cell cycle	0.05845	1	11.102	0.93483	0.08312	NaN	1	32	17	6	2
regulation of protein kinase activity	45859	biological process	0.16999	0.99562	3.99924	0.78329	0.18677	0.10884	1	4	21126	25	1
carboxylic acid transport	46942	biological process	0.85981	0.46927	3.99924	0.78329	0.59133	1	1	4	21126	0	0
male gamete generation	48232	biological process	0.58353	0.23996	4.99882	0.81206	0.53707	1	1	5	21125	0	0
organ development	48513	biological process	0.09232	0.59933	34.942	0.93563	0.55563	0.26129	1	35	21095	6	2
organ development	48513	7275 development	0.22685	0.58297	28.8442	0.46291	0.79341	6e-05	1	35	164	6	2
positive regulation of biological process	48518	biological process	0.73798	0.8153	8.99617	0.86701	0.92187	1	1	9	21121	0	0
positive regulation of biological process	48518	50789 regulation of biological process	0.50512	0.86265	6.3871	0.06755	0.74413	1	1	9	22	0	0
positive regulation of biological process	48518	30154 cell differentiation	0.68405	0.50912	6	0.04932	0.89769	1	1	9	18	0	0
negative regulation of biological process	48519	biological process	0.02196	0.99118	37.9317	0.93831	0.06554	0.09187	1	38	21092	8	3
negative regulation of biological process	48519	50789 regulation of biological process	0.12852	0.94316	14.3279	0.44686	0.10965	NaN	1	38	23	8	3
negative regulation of biological process	48519	30154 cell differentiation	0.13962	0.69487	13.1035	0.3694	0.46662	NaN	1	38	20	8	3
hemopoietic or lymphoid organ development	48534	biological process	0.43656	0.1599	2.99957	0.73579	0.63888	1	1	3	21127	0	0
hemopoietic or lymphoid organ development	48534	48513 organ development	0.65417	0.14714	2.74286	0.03892	0.46138	1	1	3	32	0	0
reproductive organismal physiological process	48609	biological process	0.95366	0.1604	4.99882	0.81206	0.16946	1	1	5	21125	0	0
reproductive organismal physiological process	48609	50874 organismal physiological process	0.9269	0.16563	4.90494	0.81619	0.23867	1	1	5	258	0	0
system development	48731	biological process	0.13091	0.66562	35.9387	0.93656	0.78005	0.64581	1	36	21094	3	1
system development	48731	7275 development	0.22628	0.49124	29.4874	0.96247	0.86794	0.01355	1	36	163	3	1
regulation of biological process	50789	biological process	0.75623	0.39521	22.975	0.9199	0.65712	0.13749	1	23	21107	9	2
regulation of physiological process	50791	biological process	0.82267	0.37396	18.9829	0.91142	0.55059	0.42164	1	19	21111	5	1
regulation of physiological process	50791	7582 physiological process	0.79154	0.60886	18.7041	0.91326	0.79015	0.0284	1	19	1201	5	1
regulation of physiological process	50791	50789 regulation of biological process	0.76261	0.63891	3.30435	0.19187	0.7765	0.0009	1	19	4	5	1
regulation of cellular process	50794	biological process	0.84748	0.51256	15.9879	0.90294	0.54784	0.36939	1	16	21114	6	1
regulation of cellular process	50794	9987 cellular process	0.85353	0.5216	15.7799	0.90471	0.72689	0.02323	1	16	1147	6	1
regulation of cellular process	50794	50789 regulation of biological process	0.72247	0.49361	4.86957	0.15874	0.71326	0.00076	1	16	7	6	1
organismal physiological process	50874	biological process	0.55938	0.1489	259.726	NaN	NaN	0.20358	0.39294	263	20867	7	18
organismal physiological process	50874	7582 physiological process	0.20675	0.28218	206.304	NaN	NaN	0	0	263	957	7	18
cellular physiological process	50875	biological process	0.06392	0.01397	360.626	NaN	NaN	0.70361	0.99712	367	20763	3	12
cellular physiological process	50875	7582 physiological process	0.05323	0.60089	256.599	NaN	NaN	0	0.00349	367	853	3	12
cellular physiological process	50875	9987 cellular process	0.06218	0.64393	251.188	NaN	NaN	0	0.00102	367	796	3	12
reproductive physiological process	50876	biological process	0.95366	0.1604	4.99882	0.81206	0.16946	1	1	5	21125	0	0
reproductive physiological process	50876	3 reproduction	0.89118	0.20404	3.52941	0.28053	0.32838	1	1	5	12	0	0
reproductive physiological process	50876	7582 physiological process	0.97561	0.1419	4.97951	0.8129	0.2098	1	1	5	1215	0	0
neurophysiological process	50877	biological process	0.71297	0.14162	73.7408	NaN	NaN	0.88181	1	74	21056	1	1
neurophysiological process	50877	50874 organismal physiological process	0.39328	0.23554	53.1787	0.97712	NaN	0.03109	1	74	189	1	1
neurophysiological process	50877	7582 physiological process	0.86181	0.37483	69.5115	NaN	NaN	0.10627	1	74	1146	1	1
response to stimulus	50896	biological process	0.92212	0.00867	211.833	NaN	NaN	0.39627	0.33845	214	20916	7	14
sensory perception of light stimulus	50953	biological process	0.84942	0.13402	21.9771	0.91801	0.30795	1	1	22	21108	0	0
sensory perception of light stimulus	50953	7600 sensory perception	0.55776	0.25181	15.4595	0.9592	0.63195	1	1	22	52	0	0
sensory perception of mechanical stimulus	50954	biological process	0.71082	0.32275	5.9983	0.83182	0.7849	1	1	6	21124	0	0
sensory perception of mechanical stimulus	50954	7600 sensory perception	0.50851	0.30638	5.51351	0.84931	0.85077	1	1	6	68	0	0
localization	51179	biological process	0.10076	0.08139	216.73	NaN	NaN	0.7433	0.99744	219	20911	3	6
localization	51179	7582 physiological process	0.12748	0.47041	179.688	NaN	NaN	1e-05	0.18817	219	1001	3	6
vitamin transport	51180	biological process	0.46132	0.54879	2.99957	0.73579	0.97108	1	1	3	21127	0	0
vitamin transport	51180	6810 transport	0.30515	0.45939	2.97161	0.7381	0.91683	1	1	3	314	0	0
establishment of localization	51234	biological process	0.12771	0.05005	202.03	NaN	NaN	0.83172	0.99614	204	20926	2	5
establishment of localization	51234	51179 localization	0.94801	0.35207	13.9726	1.09068	0.54882	NaN	NaN	204	15	2	5
chromosome organization and biogenesis	51276	biological process	0.52198	0.147	9.99527	0.87463	0.75592	1	1	10	21120	0	0
chromosome organization and biogenesis	51276	6996 organelle organization and biogenesis	0.34965	0.24684	8.46154	0.03274	0.94925	1	1	10	55	0	0
cell division	51301	biological process	0.73587	0.22197	6.99768	0.84644	0.50658	1	1	7	21123	0	0
cell division	51301	50875 cellular physiological process	0.7381	0.30407	6.86649	0.85009	0.53019	1	1	7	360	0	0
meiotic cell cycle	51321	biological process	0.68657	0.08239	3.99924	0.78329	0.3989	1	1	4	21126	0	0
meiotic cell cycle	51321	7049 cell cycle	0.71488	0.0589	3.73333	0.79965	0.30658	1	1	4	56	0	0
interaction between organisms	51704	biological process	0.88693	0.11461	11.9932	0.88661	0.08427	0.29233	0.27771	12	21118	17	2
response to other organism	51707	biological process	0.04793	0.96869	7.99697	0.85783	0.06431	1	1	8	21122	0	0
response to other organism	51707	9607 response to biotic stimulus	0.00744	0.98212	7.6701	0.86548	0.01341	1	1	8	186	0	0
